# Supplementary material for: Adaptive Differences in Gene Expression in Farm-Impacted Seedbeds of the Native Blue Mussel Mytilus chilensis
Source: Front Genet. 2021 May 20;12:666539. doi: 10.3389/fgene.2021.666539 (PMC8174845; doi:10.3389/fgene.2021.666539)
Supplement: Supplementary Table 1 — Listed raw data from sequencing available in GenBank under the Bio Project accession number PRJNA630273. [file Table_1.xlsx]

## Sheet: SRA GenBank-data abstract 
#	Accession	Title	Experiment	Library ID	BioProject	BioSample	Status	Submission	SRA.filename
1	SRR11804636	RNA-Seq of Mytilus chilensis: LCo adult gill-Replicate 1	SRX8356080	LCo-gR1	PRJNA630273	SAMN14829725	Released	SUB7456787	P7_1.fastq, P7_2.fastq
2	SRR14029547	RNA-Seq of Mytilus chilensis: LCo adult gill-Replicate 3	SRX10406015	LCo-gR3	PRJNA630273	SAMN14829725	Released	SUB9334172	P9_1.fastq, P9_2.fastq
3	SRR14028687	RNA-Seq of Mytilus chilensis: LCo adult gill-Replicate 2	SRX10405270	LCo-gR2	PRJNA630273	SAMN14829725	Released	SUB9333506	P8_1.fastq, P8_2.fastq
4	SRR11802012	RNA-Seq of Mytilus chilensis: LYa adult gill-Replicate 1	SRX8353458	LYa-gR1	PRJNA630273	SAMN14829725	Released	SUB7454055	P1_1.fastq, P1_2.fastq
5	SRR14022731	RNA-Seq of Mytilus chilensis: LYa adult gill-Replicate 2	SRX10399338	LYa_gR2	PRJNA630273	SAMN14829725	Released	SUB9330406	P2_1.fastq, P2_2.fastq
6	SRR14022733	RNA-Seq of Mytilus chilensis: LYa adult gill-Replicate 3	SRX10399340	LYa_gR3	PRJNA630273	SAMN14829725	Released	SUB9330540	P3_1.fastq, P3_2.fastq
7	SRR11806302	RNA-Seq of Mytilus chilensis: LCo adult mantle-Replicate 1	SRX8357717	LCo_mR1	PRJNA630273	SAMN14829725	Released	SUB7457024	MP7_1.fastq, MP7_2.fastq
8	SRR14028188	RNA-Seq of Mytilus chilensis: LCo adult mantle-Replicate 2	SRX10404789	LCo_mR2	PRJNA630273	SAMN14829725	Released	SUB9330678	MP8_1.fastq, MP8_2.fastq
9	SRR14028489	RNA-Seq of Mytilus chilensis: LCo adult mantle-Replicate 3	SRX10405072	LCo_mR3	PRJNA630273	SAMN14829725	Released	SUB9333434	MP9_1.fastq, MP9_2.fastq
10	SRR11804833	RNA-Seq of Mytilus chilensis: LYa adult mantle-Replicate 1	SRX8356265	LYa_mR1	PRJNA630273	SAMN14829725	Released	SUB7456877	MP10_1.fastq, MP10_2.fastq
11	SRR14023697	RNA-Seq of Mytilus chilensis: LYa adult mantle-Replicate 2	SRX10400304	LYa_mR2	PRJNA630273	SAMN14829725	Released	SUB9330637	MP11_1.fastq, MP11_2.fastq
12	SRR14023939	RNA-Seq of Mytilus chilensis: LYa adult mantle-Replicate 3	SRX10400546	LYa_mR3	PRJNA630273	SAMN14829725	Released	SUB9330657	MP12_1.fastq, MP12_2.fastq
