# Supplementary material for: Adaptive Differences in Gene Expression in Farm-Impacted Seedbeds of the Native Blue Mussel Mytilus chilensis
Source: Front Genet. 2021 May 20;12:666539. doi: 10.3389/fgene.2021.666539 (PMC8174845; doi:10.3389/fgene.2021.666539)
Supplement: Supplementary Table 4 — Inter-location by tissue comparison. CLC Genomic Workbench output data. [file Table_4.xlsx]

## Sheet: LYa_g vs  LCo_g Stats
Name	Fold change	P-value	FDR p-value	Bonferroni
LYa_b1_contig_296064 (154..2479) consensus	12231.4	2.14438e-08	1.26776e-05	0
LYa_b1_contig_349399 (65..552) consensus	8970.34	5.99566e-08	2.92225e-05	0
LYa_b1_contig_13830 (1..202) consensus	8388.57	3.72033e-08	2.02022e-05	0
LYa_b1_contig_9068 (37..637) consensus	6550.66	6.08423e-08	2.95103e-05	0
LYa_b1_contig_295993 (7..386) consensus	5374.5	3.74777e-07	0.000129572	0
LYa_b1_contig_295989 (36..452) consensus	5190.94	4.22296e-07	0.000142548	0
LYa_b1_contig_982 (95..1660) consensus	4555.36	2.6869e-07	0.000100173	0
LYa_b1_contig_296160 (40..358) consensus	4444.68	6.53998e-07	0.000195059	0
LYa_b1_contig_349530 (10..466) consensus	4144.74	8.39825e-07	0.000234391	0
LYa_b1_contig_3849 (120..2049) consensus	3682.01	6.37389e-07	0.00019138	0
LYa_b1_contig_269883 (20..316) consensus	3549.95	1.4185e-06	0.000357906	0
LYa_b1_contig_18744 (65..492) consensus	3134.93	7.68825e-07	0.00021948	0
LYa_b1_contig_4187 (5..299) consensus	2912.77	2.38112e-06	0.000534634	0
LYa_b1_contig_62658 (3620..6357) consensus	2758.81	2.91714e-06	0.000628735	1
LYa_b1_contig_217595 (228..2545) consensus	2666.6	3.39219e-06	0.000698832	1
LYa_b1_contig_349490 (128..825) consensus	2610.72	3.67214e-06	0.000741223	1
LYa_b1_contig_296458 (1..863) consensus	2525.46	2.02561e-06	0.000469584	0
LYa_b1_contig_2545 (1..445) consensus	2110.93	6.37109e-06	0.00113877	1
LYa_b1_contig_123224 (27..1977) consensus	2077.02	7.50536e-06	0.00129517	1
LYa_b1_contig_23937 (1..1387) consensus	1963.03	3.7468e-06	0.000750232	1
LYa_b1_contig_349610 (55..710) consensus	1945.7	9.36331e-06	0.00150018	1
LYa_b1_contig_295994 (52..392) consensus	1942.9	9.21337e-06	0.00148958	1
LYa_b1_contig_627 (841..1436) consensus	1869.94	9.36785e-06	0.00150018	1
LYa_b1_contig_15031 (1..638) consensus	1821.74	1.01256e-05	0.00160843	1
LYa_b1_contig_10378 (78..974) consensus	1820.63	5.51783e-06	0.00100974	1
LYa_b1_contig_122699 (18..1609) consensus	1814.99	1.2988e-05	0.00197821	1
LYa_b1_contig_296135 (1067..1460) consensus	1800.79	1.32551e-05	0.00199457	1
LYa_b1_contig_297605 (8..1180) consensus	1780.23	1.39223e-05	0.00206063	1
LYa_b1_contig_296135 (200..719) consensus	1768.39	1.41776e-05	0.00208625	1
LYa_b1_contig_296211 (8..591) consensus	1676.6	1.61507e-05	0.00227442	1
LYa_b1_contig_296137 (76..464) consensus	1617.39	1.80623e-05	0.00247222	1
LYa_b1_contig_41001 (204..757) consensus	1493.04	2.23243e-05	0.00285968	1
LYa_b1_contig_43095 (1..318) consensus	1434.83	1.3346e-05	0.00200222	1
LYa_b1_contig_296510 (166..643) consensus	1424.95	2.47604e-05	0.00309632	1
LYa_b1_contig_159 (679..1589) consensus	1396.58	6.30278e-22	2.09916e-17	0
LYa_b1_contig_8386 (92..485) consensus	1377	2.33074e-05	0.00295156	1
LYa_b1_contig_349532 (59..669) consensus	1364.5	2.75623e-05	0.00335434	1
LYa_b1_contig_35698 (354..1239) consensus	1359.66	1.3934e-05	0.00206063	1
LYa_b1_contig_296308 (197..481) consensus	1358.34	1.45175e-05	0.00210527	1
LYa_b1_contig_3734 (311..1765) consensus	1324.13	2.18703e-05	0.00281708	1
LYa_b1_contig_11493 (145..1629) consensus	1269.76	1.61847e-05	0.00227442	1
LYa_b1_contig_20670 (4..439) consensus	1245.08	1.44537e-05	0.00209907	1
LYa_b1_contig_11821 (85..541) consensus	1230.22	3.53065e-05	0.00403164	1
LYa_b1_contig_21146 (1..849) consensus	1207.83	1.5001e-05	0.00215661	1
LYa_b1_contig_14517 (1..2743) consensus	1176.89	2.13322e-05	0.00277169	1
LYa_b1_contig_349749 (1..1285) consensus	1160.52	4.24111e-05	0.00460382	1
LYa_b1_contig_128451 (51..700) consensus	1154.93	4.22e-05	0.00460311	1
LYa_b1_contig_349436 (1..574) consensus	1149.35	4.25702e-05	0.00461328	1
LYa_b1_contig_296390 (1..946) consensus	1134.8	4.78588e-05	0.00507192	1
LYa_b1_contig_297247 (171..697) consensus	1131.84	4.81334e-05	0.00508921	1
LYa_b1_contig_1408 (3..712) consensus	1104.52	2.51065e-05	0.00312336	1
LYa_b1_contig_53621 (287..981) consensus	1092.7	2.00331e-05	0.00265881	1
LYa_b1_contig_315638 (1..1103) consensus	1090.67	4.96119e-05	0.00522892	1
LYa_b1_contig_3415 (1..1319) consensus	1060.64	1.23829e-11	2.33938e-08	0
LYa_b1_contig_17721 (25..347) consensus	1057.14	5.24761e-05	0.00542774	1
LYa_b1_contig_189549 (1..470) consensus	1045.98	6.3209e-05	0.00615114	1
LYa_b1_contig_349637 (1..274) consensus	1043.16	5.78858e-05	0.00581278	1
LYa_b1_contig_147104 (272..1719) consensus	1036.44	3.92811e-05	0.00435269	1
LYa_b1_contig_4807 (67..1394) consensus	1030.85	5.62502e-05	0.00570589	1
LYa_b1_contig_19267 (240..656) consensus	1028.66	5.68488e-05	0.00573748	1
LYa_b1_contig_349381 (94..495) consensus	1011.51	1.81332e-11	3.20799e-08	0
LYa_b1_contig_349718 (1..381) consensus	1009.63	6.32107e-05	0.00615114	1
LYa_b1_contig_298340 (17..317) consensus	1001.57	7.24317e-05	0.00672592	1
LYa_b1_contig_198930 (1..963) consensus	989.533	3.747e-05	0.00421605	1
LYa_b1_contig_15346 (166..3410) consensus	972.111	6.71243e-05	0.00641798	1
LYa_b1_contig_297511 (147..1554) consensus	942.355	8.57444e-05	0.00763268	1
LYa_b1_contig_31549 (1..252) consensus	936.774	3.02038e-05	0.00360482	1
LYa_b1_contig_5870 (4..802) consensus	932.264	7.43155e-05	0.00686947	1
LYa_b1_contig_2562 (1031..1785) consensus	921.31	7.55138e-05	0.00694459	1
LYa_b1_contig_65119 (72..1298) consensus	911.052	5.72882e-05	0.00576436	1
LYa_b1_contig_3435 (188..1605) consensus	901.306	3.37715e-05	0.00390546	1
LYa_b1_contig_34028 (92..573) consensus	878.944	7.99358e-05	0.00724155	1
LYa_b1_contig_1175 (1656..1939) consensus	877.658	5.17477e-05	0.00538025	1
LYa_b1_contig_9250 (1..358) consensus	868.73	8.73953e-05	0.00771046	1
LYa_b1_contig_855 (52..1252) consensus	868.086	8.57205e-05	0.00763268	1
LYa_b1_contig_349820 (62..1183) consensus	853.159	0.000102653	0.00868986	1
LYa_b1_contig_5051 (144..1720) consensus	849.013	8.96055e-05	0.00786042	1
LYa_b1_contig_13374 (1..1317) consensus	846.296	6.12376e-05	0.00605204	1
LYa_b1_contig_5542 (1..2308) consensus	831.265	6.18899e-05	0.00608043	1
LYa_b1_contig_21136 (8..1138) consensus	824.017	1.85043e-20	2.64125e-16	0
LYa_b1_contig_295969 (1..440) consensus	823.928	0.000127892	0.0102392	1
LYa_b1_contig_297895 (44..692) consensus	823.928	0.000127827	0.0102392	1
LYa_b1_contig_349792 (129..2968) consensus	816.834	0.00011916	0.00968758	1
LYa_b1_contig_71243 (1104..2238) consensus	816.342	7.99414e-05	0.00724155	1
LYa_b1_contig_7712 (67..649) consensus	809.578	0.000102801	0.00868986	1
LYa_b1_contig_149002 (1302..1793) consensus	797.282	0.000137243	0.0107635	1
LYa_b1_contig_31333 (63..1126) consensus	776.729	5.16779e-05	0.00537859	1
LYa_b1_contig_6385 (1..330) consensus	767.617	2.69637e-16	2.07239e-12	0
LYa_b1_contig_296834 (114..785) consensus	755.832	0.000147327	0.0112313	1
LYa_b1_contig_138180 (7..810) consensus	755.703	0.000142514	0.0110042	1
LYa_b1_contig_123104 (6..1956) consensus	749.773	0.000148174	0.0112671	1
LYa_b1_contig_38705 (48..1097) consensus	748.087	6.07323e-05	0.00601997	1
LYa_b1_contig_297269 (1..947) consensus	742.616	8.612e-05	0.00765549	1
LYa_b1_contig_940 (69..1604) consensus	733.506	0.000131431	0.0104305	1
LYa_b1_contig_296266 (94..1250) consensus	731.181	8.29526e-05	0.00747255	1
LYa_b1_contig_21875 (16..311) consensus	730.708	0.000134445	0.0106275	1
LYa_b1_contig_30448 (333..2326) consensus	713.181	0.000144271	0.0110659	1
LYa_b1_contig_296182 (1..291) consensus	708.461	0.000168911	0.012355	1
LYa_b1_contig_296538 (206..1539) consensus	699.579	0.000177275	0.0127613	1
LYa_b1_contig_5870 (970..1379) consensus	689.082	0.00015882	0.0119044	1
LYa_b1_contig_155758 (93..1247) consensus	684.776	0.000184651	0.0131594	1
LYa_b1_contig_349828 (150..1584) consensus	682.712	0.000197858	0.0138149	1
LYa_b1_contig_15710 (16..673) consensus	677.354	7.7329e-05	0.00707546	1
LYa_b1_contig_164535 (1..1645) consensus	675.57	0.000184001	0.0131225	1
LYa_b1_contig_349791 (29..597) consensus	671.535	0.000209273	0.0143612	1
LYa_b1_contig_10343 (1..340) consensus	669.437	0.000101808	0.00864991	1
LYa_b1_contig_336928 (2587..4114) consensus	640.969	0.000215414	0.0146417	1
LYa_b1_contig_349810 (1..413) consensus	640.799	0.000219378	0.0148304	1
LYa_b1_contig_349506 (12..637) consensus	635.21	0.000225512	0.0151223	1
LYa_b1_contig_296224 (2154..3514) consensus	634.444	0.000225768	0.0151294	1
LYa_b1_contig_62658 (51..497) consensus	624.033	0.000225968	0.0151326	1
LYa_b1_contig_43311 (1..448) consensus	617.49	0.000195174	0.0136945	1
LYa_b1_contig_627 (104..805) consensus	608.022	0.000231916	0.0153763	1
LYa_b1_contig_2814 (113..1712) consensus	603.64	0.000241663	0.0158412	1
LYa_b1_contig_237123 (1..1254) consensus	599.727	1.68471e-13	6.47421e-10	0
LYa_b1_contig_349459 (1..368) consensus	593.297	0.00025235	0.016288	1
LYa_b1_contig_349457 (3..415) consensus	593.297	0.000251556	0.0162682	1
LYa_b1_contig_122549 (400..2503) consensus	590.503	0.000257236	0.0164699	1
LYa_b1_contig_37020 (8..1945) consensus	588.911	0.000248141	0.0161125	1
LYa_b1_contig_11226 (1..586) consensus	588.432	0.000242375	0.0158593	1
LYa_b1_contig_296422 (201..1478) consensus	587.074	0.000301758	0.0184858	1
LYa_b1_contig_34228 (3..1076) consensus	584.218	0.000141028	0.0109402	1
LYa_b1_contig_20828 (896..2851) consensus	583.922	0.000257579	0.0164765	1
LYa_b1_contig_22681 (632..1452) consensus	573.738	0.000281828	0.0176546	1
LYa_b1_contig_11070 (4..464) consensus	568.587	0.000272247	0.0172272	1
LYa_b1_contig_104976 (18..328) consensus	565.513	0.000119309	0.00969178	1
LYa_b1_contig_296934 (1..695) consensus	560.427	0.000329986	0.0196489	1
LYa_b1_contig_14863 (50..882) consensus	559.823	0.000288571	0.0179644	1
LYa_b1_contig_50576 (1100..1942) consensus	559.823	0.000288447	0.0179644	1
LYa_b1_contig_16569 (85..609) consensus	558.837	0.000160286	0.0119247	1
LYa_b1_contig_6645 (2467..3951) consensus	546.276	0.000169549	0.0123793	1
LYa_b1_contig_350410 (29..442) consensus	545.795	0.000309085	0.0187614	1
LYa_b1_contig_103605 (1..302) consensus	544.946	0.000204019	0.0141169	1
LYa_b1_contig_349872 (1..203) consensus	543.001	0.000313115	0.0189035	1
LYa_b1_contig_24319 (213..1457) consensus	541.931	0.000165803	0.0121722	1
LYa_b1_contig_34041 (278..3603) consensus	534.963	0.000169897	0.0123845	1
LYa_b1_contig_296100 (34..1277) consensus	533.781	0.000357296	0.0209628	1
LYa_b1_contig_37236 (90..541) consensus	524.223	0.000227173	0.0151828	1
LYa_b1_contig_17444 (1..446) consensus	505.053	0.00038323	0.0220823	1
LYa_b1_contig_20593 (557..981) consensus	500.671	0.000398111	0.0226524	1
LYa_b1_contig_27826 (13..3464) consensus	498.48	0.000401303	0.0227671	1
LYa_b1_contig_16646 (5..982) consensus	494.098	0.000406594	0.0229404	1
LYa_b1_contig_32586 (149..674) consensus	492.68	0.000399593	0.0227238	1
LYa_b1_contig_50576 (141..1080) consensus	491.908	0.000407752	0.0229656	1
LYa_b1_contig_1141 (171..2575) consensus	491.908	0.000407752	0.0229656	1
LYa_b1_contig_5922 (85..639) consensus	489.717	0.000405985	0.0229404	1
LYa_b1_contig_296525 (1273..1915) consensus	486.41	0.000439498	0.024128	1
LYa_b1_contig_46798 (1..1485) consensus	486.064	0.000244114	0.0159313	1
LYa_b1_contig_259985 (796..1967) consensus	480.489	0.000446071	0.0243816	1
LYa_b1_contig_8521 (17..372) consensus	480.236	0.000302978	0.0185379	1
LYa_b1_contig_17925 (1..714) consensus	479.557	0.000220197	0.0148757	1
LYa_b1_contig_296525 (278..1202) consensus	474.568	0.000465235	0.0249514	1
LYa_b1_contig_82823 (83..534) consensus	471.162	0.00026317	0.0167804	1
LYa_b1_contig_173728 (1..760) consensus	470.352	0.000481169	0.0254912	1
LYa_b1_contig_2570 (234..1155) consensus	469.544	5.67085e-09	4.49689e-06	0
LYa_b1_contig_17748 (71..982) consensus	467.808	0.000435681	0.0239975	1
LYa_b1_contig_44007 (49..1111) consensus	467.808	0.000435679	0.0239975	1
LYa_b1_contig_349632 (1..777) consensus	463.925	1.36324e-08	8.62083e-06	0
LYa_b1_contig_238968 (453..1202) consensus	461.315	0.000264197	0.0168137	1
LYa_b1_contig_19243 (990..1603) consensus	460.584	0.000213402	0.0145544	1
LYa_b1_contig_297477 (166..1028) consensus	459.764	0.000521541	0.0268213	1
LYa_b1_contig_296109 (98..1396) consensus	456.804	0.000535757	0.0272857	1
LYa_b1_contig_350935 (248..1705) consensus	453.586	0.000509903	0.026425	1
LYa_b1_contig_5179 (1..215) consensus	451.9	1.02438e-20	1.70587e-16	0
LYa_b1_contig_206011 (105..1980) consensus	450.963	0.000499945	0.0261395	1
LYa_b1_contig_48576 (511..1478) consensus	449.864	0.000221469	0.0149112	1
LYa_b1_contig_349517 (73..1061) consensus	447.998	0.000518787	0.0267613	1
LYa_b1_contig_82472 (707..2433) consensus	444.961	0.000592148	0.0291167	1
LYa_b1_contig_45185 (1..645) consensus	443.754	0.000345327	0.0203922	1
LYa_b1_contig_175656 (1..1672) consensus	443.38	1.72733e-08	1.05882e-05	0
LYa_b1_contig_297378 (97..568) consensus	442	0.000607794	0.0295247	1
LYa_b1_contig_165467 (199..1148) consensus	442	0.000608353	0.0295247	1
LYa_b1_contig_28685 (571..1515) consensus	440.99	0.000274001	0.0172933	1
LYa_b1_contig_33031 (1..1221) consensus	439.902	0.000344521	0.0203567	1
LYa_b1_contig_296876 (216..1679) consensus	439.039	0.000622046	0.0299529	1
LYa_b1_contig_10134 (75..3908) consensus	438.394	7.75041e-09	5.65248e-06	0
LYa_b1_contig_296048 (2..741) consensus	424.236	0.000676097	0.0316407	1
LYa_b1_contig_296437 (331..1522) consensus	424.074	0.000655971	0.0309452	1
LYa_b1_contig_100664 (65..452) consensus	417.99	0.000342446	0.0202701	1
LYa_b1_contig_106396 (25..1372) consensus	417.944	0.000558131	0.0280814	1
LYa_b1_contig_349866 (146..772) consensus	414.467	0.000613312	0.0296467	1
LYa_b1_contig_80532 (1590..1977) consensus	408.879	0.000647586	0.0307095	1
LYa_b1_contig_350859 (28..445) consensus	408.879	0.000647523	0.0307095	1
LYa_b1_contig_116408 (6826..7907) consensus	408.879	0.000647486	0.0307095	1
LYa_b1_contig_150300 (918..1466) consensus	403.511	0.000753554	0.0344662	1
LYa_b1_contig_45159 (144..2683) consensus	402.259	0.000304136	0.0185812	1
LYa_b1_contig_42967 (1..207) consensus	402.083	0.000594843	0.0291488	1
LYa_b1_contig_349693 (134..571) consensus	400.496	0.000665667	0.0312697	1
LYa_b1_contig_296841 (1..703) consensus	397.794	0.000576855	0.0286894	1
LYa_b1_contig_296911 (124..841) consensus	395.353	0.000423746	0.0235609	1
LYa_b1_contig_349501 (40..1709) consensus	394.427	1.24091e-11	2.33938e-08	0
LYa_b1_contig_34271 (1..375) consensus	391.336	0.000380865	0.0219588	1
LYa_b1_contig_13374 (1319..1728) consensus	390.552	0.000469216	0.0250841	1
LYa_b1_contig_35956 (173..561) consensus	389.578	0.000313669	0.0189255	1
LYa_b1_contig_123816 (6..1822) consensus	385.927	0.000743655	0.034178	1
LYa_b1_contig_296289 (15..245) consensus	385.747	0.000807388	0.0360404	1
LYa_b1_contig_24612 (71..777) consensus	384.557	0.000683825	0.0319127	1
LYa_b1_contig_238248 (1..833) consensus	383.731	0.000769242	0.0348835	1
LYa_b1_contig_3364 (25..367) consensus	380.907	0.000396752	0.0226008	1
LYa_b1_contig_95457 (1..1574) consensus	380.75	0.000390475	0.0223708	1
LYa_b1_contig_46798 (1740..3853) consensus	379.576	0.000488365	0.0257496	1
LYa_b1_contig_6645 (4210..5456) consensus	378.776	0.000452476	0.0246508	1
LYa_b1_contig_349649 (36..372) consensus	378.143	0.000824747	0.0365921	1
LYa_b1_contig_300043 (141..780) consensus	376.865	0.000844758	0.0371174	1
LYa_b1_contig_34822 (1..470) consensus	371.256	0.000426399	0.0236296	1
LYa_b1_contig_714 (364..1874) consensus	370.355	0.000367734	0.0214242	1
LYa_b1_contig_118754 (1..1561) consensus	369.162	0.000876067	0.0380939	1
LYa_b1_contig_24589 (53..1250) consensus	365.677	0.00075675	0.0345726	1
LYa_b1_contig_49440 (23..1420) consensus	364.742	0.000834409	0.0368408	1
LYa_b1_contig_17068 (12..869) consensus	363.483	0.000497592	0.0260782	1
LYa_b1_contig_16495 (1842..3916) consensus	362.648	0.000845667	0.037141	1
LYa_b1_contig_297135 (84..499) consensus	362.062	0.000893566	0.0385166	1
LYa_b1_contig_295877 (727..1258) consensus	362.062	0.000893529	0.0385166	1
LYa_b1_contig_45125 (26..1047) consensus	360.458	0.000857766	0.0375403	1
LYa_b1_contig_29560 (1..829) consensus	359.417	0.00059638	0.0291924	1
LYa_b1_contig_295887 (85..414) consensus	359.101	0.000927058	0.0394329	1
LYa_b1_contig_32510 (425..2274) consensus	356.909	0.00056154	0.0281728	1
LYa_b1_contig_295877 (164..687) consensus	356.14	0.000942542	0.0399044	1
LYa_b1_contig_349649 (375..651) consensus	355.789	0.000993815	0.0412133	1
LYa_b1_contig_219818 (324..1338) consensus	353.895	0.00058454	0.028899	1
LYa_b1_contig_298494 (1..334) consensus	353.18	0.000948638	0.0400238	1
LYa_b1_contig_349426 (15..822) consensus	352.995	0.00100997	0.0416303	1
LYa_b1_contig_296543 (1..534) consensus	351.916	0.000625055	0.0300544	1
LYa_b1_contig_34820 (1..646) consensus	351.694	0.000880965	0.038174	1
LYa_b1_contig_82119 (80..458) consensus	350.743	0.000615365	0.0297172	1
LYa_b1_contig_54432 (1..710) consensus	350.46	0.000480238	0.0254689	1
LYa_b1_contig_296505 (7..271) consensus	350.219	0.000948164	0.0400238	1
LYa_b1_contig_6645 (5527..6446) consensus	344.415	0.000464336	0.024942	1
LYa_b1_contig_8521 (489..1670) consensus	344.361	2.79943e-17	2.5428e-13	0
LYa_b1_contig_30776 (1..689) consensus	344.171	0.000556833	0.0280709	1
LYa_b1_contig_3109 (864..2212) consensus	340.241	0.000548382	0.027771	1
LYa_b1_contig_32545 (1..907) consensus	338.393	0.000713971	0.0330245	1
LYa_b1_contig_15692 (1..217) consensus	338.094	0.00044745	0.0244303	1
LYa_b1_contig_350397 (1..638) consensus	337.081	0.000955865	0.0401445	1
LYa_b1_contig_2214 (66..900) consensus	336.867	5.52696e-08	2.76116e-05	0
LYa_b1_contig_79354 (1..245) consensus	336.806	0.000641494	0.0305945	1
LYa_b1_contig_296199 (83..1019) consensus	335.416	0.00104265	0.0425215	1
LYa_b1_contig_349606 (2..736) consensus	333.435	0.00110002	0.0440872	1
LYa_b1_contig_53311 (1071..1658) consensus	331.553	0.00068141	0.0318148	1
LYa_b1_contig_194349 (308..653) consensus	329.494	0.00107142	0.0433411	1
LYa_b1_contig_296269 (1..369) consensus	326.534	0.00111913	0.0446204	1
LYa_b1_contig_110528 (58..614) consensus	325.767	0.000521576	0.0268213	1
LYa_b1_contig_108904 (1055..2290) consensus	325.053	0.00114036	0.0451785	1
LYa_b1_contig_38687 (1..382) consensus	323.611	0.000856157	0.0374908	1
LYa_b1_contig_296451 (438..1342) consensus	323.573	0.00116079	0.045698	1
LYa_b1_contig_38307 (101..1089) consensus	322.53	2.32225e-10	2.97474e-07	0
LYa_b1_contig_21870 (116..1164) consensus	321.023	0.00102378	0.0419962	1
LYa_b1_contig_49262 (339..1159) consensus	319.717	0.000763028	0.0347389	1
LYa_b1_contig_349605 (230..585) consensus	319.464	0.00117011	0.0459251	1
LYa_b1_contig_7019 (139..1290) consensus	319.282	2.5015e-09	2.19246e-06	0
LYa_b1_contig_65048 (5..455) consensus	317.808	0.000672638	0.0315275	1
LYa_b1_contig_38492 (24..604) consensus	316.641	0.00105439	0.0428429	1
LYa_b1_contig_26563 (1440..2446) consensus	316.557	0.000647743	0.0307095	1
LYa_b1_contig_132446 (1..385) consensus	316.371	0.000628807	0.0302057	1
LYa_b1_contig_64042 (1..253) consensus	313.876	0.0012076	0.0468396	1
LYa_b1_contig_57829 (1..248) consensus	311.082	0.00121976	0.0470737	1
LYa_b1_contig_7095 (1..1884) consensus	309.669	3.60452e-09	2.97644e-06	0
LYa_b1_contig_299179 (567..1375) consensus	309.477	0.000658945	0.0310709	1
LYa_b1_contig_296447 (1..280) consensus	305.7	0.000734776	0.0338478	1
LYa_b1_contig_349525 (1..445) consensus	305.493	0.00125924	0.0479124	1
LYa_b1_contig_44287 (1..864) consensus	303.496	0.00115476	0.0455502	1
LYa_b1_contig_94620 (936..1978) consensus	302.848	0.00135967	0.0503588	1
LYa_b1_contig_242340 (2648..3878) consensus	302.202	0.0012425	0.0475473	1
LYa_b1_contig_110235 (55..844) consensus	302.06	0.000596507	0.0291924	1
LYa_b1_contig_41599 (136..612) consensus	299.114	0.00120081	0.0466306	1
LYa_b1_contig_40620 (1..217) consensus	297.664	0.00085626	0.0374908	1
LYa_b1_contig_350030 (128..575) consensus	297.111	0.00131244	0.0492059	1
LYa_b1_contig_22675 (617..2097) consensus	296.923	0.00122218	0.0471043	1
LYa_b1_contig_37101 (121..463) consensus	294.732	0.00127157	0.0482402	1
LYa_b1_contig_20174 (1183..2363) consensus	292.542	0.00130972	0.0491409	1
LYa_b1_contig_49173 (889..2538) consensus	291.863	0.00129199	0.0486792	1
LYa_b1_contig_49093 (8..996) consensus	291.264	0.00102094	0.0419269	1
LYa_b1_contig_296372 (1..345) consensus	291.005	0.00149956	0.0533964	1
LYa_b1_contig_103055 (72..347) consensus	290.242	0.000766226	0.0347935	1
LYa_b1_contig_349528 (484..1158) consensus	288.728	0.00140087	0.0514404	1
LYa_b1_contig_31327 (21..1728) consensus	288.222	1.41127e-07	5.87533e-05	0
LYa_b1_contig_264216 (34..880) consensus	286.928	2.47173e-07	9.28443e-05	0
LYa_b1_contig_247273 (45..1185) consensus	286.449	0.000821005	0.0364585	1
LYa_b1_contig_57585 (327..1208) consensus	283.778	0.00146469	0.0528514	1
LYa_b1_contig_296432 (484..1223) consensus	282.123	0.00158142	0.0554225	1
LYa_b1_contig_64863 (1..1106) consensus	281.994	0.000709269	0.0328546	1
LYa_b1_contig_28350 (65..1011) consensus	281.587	0.00150205	0.0534467	1
LYa_b1_contig_16908 (16..667) consensus	280.583	0.000896581	0.0385652	1
LYa_b1_contig_45584 (11..696) consensus	277.417	0.000921114	0.0392469	1
LYa_b1_contig_22679 (11..1042) consensus	276.462	0.000957829	0.0401605	1
LYa_b1_contig_69347 (3..682) consensus	276.213	6.12151e-09	4.71151e-06	0
LYa_b1_contig_9212 (31..599) consensus	275.954	0.00102389	0.0419962	1
LYa_b1_contig_246813 (60..778) consensus	271.963	0.00160886	0.0560302	1
LYa_b1_contig_14436 (78..750) consensus	271.919	0.000744965	0.0342068	1
LYa_b1_contig_20331 (124..1011) consensus	270.624	2.68631e-07	0.000100173	0
LYa_b1_contig_6721 (13..3328) consensus	269.169	2.37979e-12	5.6614e-09	0
LYa_b1_contig_18977 (66..766) consensus	268.442	0.00170552	0.0581203	1
LYa_b1_contig_15002 (1..745) consensus	268.442	0.00170714	0.0581383	1
LYa_b1_contig_78733 (559..1402) consensus	268.442	0.00170731	0.0581383	1
LYa_b1_contig_16397 (19..543) consensus	267.851	0.00095676	0.0401445	1
LYa_b1_contig_17143 (996..1762) consensus	266.56	0.000916057	0.0391332	1
LYa_b1_contig_349485 (1..633) consensus	266.374	0.00170928	0.0581492	1
LYa_b1_contig_98639 (231..943) consensus	264.383	0.00145496	0.0526249	1
LYa_b1_contig_81637 (58..876) consensus	264.047	0.00102609	0.0420521	1
LYa_b1_contig_350548 (140..574) consensus	263.58	0.00178408	0.0598686	1
LYa_b1_contig_28381 (1..1852) consensus	261.142	0.00158315	0.0554441	1
LYa_b1_contig_111743 (50..427) consensus	260.581	0.00106253	0.0430809	1
LYa_b1_contig_111310 (1..708) consensus	260.131	0.00111735	0.0445782	1
LYa_b1_contig_58981 (19..619) consensus	259.96	0.000978608	0.0407751	1
LYa_b1_contig_50616 (84..1022) consensus	259.79	0.00118708	0.0463674	1
LYa_b1_contig_15691 (3..1216) consensus	259.472	7.22029e-24	3.60711e-19	0
LYa_b1_contig_295992 (113..671) consensus	256.842	0.0011226	0.0446876	1
LYa_b1_contig_350695 (69..535) consensus	252.403	0.00196276	0.0636739	1
LYa_b1_contig_185534 (529..1101) consensus	252.403	0.00196352	0.0636764	1
LYa_b1_contig_166187 (1..626) consensus	251.858	0.00119701	0.0465554	1
LYa_b1_contig_32805 (521..2365) consensus	250.916	0.00189525	0.0622914	1
LYa_b1_contig_40926 (157..630) consensus	249.609	0.00201992	0.0647204	1
LYa_b1_contig_61795 (40..959) consensus	249.564	0.00105009	0.0427551	1
LYa_b1_contig_63835 (268..907) consensus	248.779	0.00109037	0.043859	1
LYa_b1_contig_351517 (1..225) consensus	246.815	0.00204152	0.0652331	1
LYa_b1_contig_17857 (1..211) consensus	244.734	0.00117504	0.0459938	1
LYa_b1_contig_29310 (1..464) consensus	244.461	0.000912951	0.0390657	1
LYa_b1_contig_349985 (1..871) consensus	244.021	0.0020901	0.0661078	1
LYa_b1_contig_7191 (101..407) consensus	243.849	8.55771e-13	2.37515e-09	0
LYa_b1_contig_44553 (466..935) consensus	242.187	0.00130613	0.0490616	1
LYa_b1_contig_5050 (1..244) consensus	242.152	0.00200584	0.0645252	1
LYa_b1_contig_48881 (1..327) consensus	242.152	0.00200565	0.0645252	1
LYa_b1_contig_37739 (22..377) consensus	242.152	0.00200684	0.0645367	1
LYa_b1_contig_122549 (2573..3506) consensus	241.226	0.00212874	0.0668925	1
LYa_b1_contig_296277 (16..312) consensus	240.674	0.00207793	0.0658802	1
LYa_b1_contig_131504 (3..745) consensus	240.662	0.00111498	0.0445554	1
LYa_b1_contig_5907 (262..1038) consensus	240.179	0.00114942	0.0454066	1
LYa_b1_contig_127696 (138..810) consensus	239.526	0.00148755	0.0532849	1
LYa_b1_contig_49049 (22..310) consensus	238.625	0.00126987	0.0482143	1
LYa_b1_contig_124950 (56..365) consensus	238.461	0.00133393	0.0496573	1
LYa_b1_contig_51794 (39..292) consensus	236.955	0.00194718	0.0632903	1
LYa_b1_contig_70869 (91..1669) consensus	236.322	0.00102571	0.0420521	1
LYa_b1_contig_349972 (67..387) consensus	235.638	0.00218089	0.0678721	1
LYa_b1_contig_714 (1907..2508) consensus	234.858	0.00100649	0.0415211	1
LYa_b1_contig_298838 (815..1787) consensus	234.629	0.00145208	0.0526186	1
LYa_b1_contig_18261 (11..963) consensus	233.622	1.74633e-06	0.000417432	0
LYa_b1_contig_296113 (53..670) consensus	228.831	0.00234561	0.070984	1
LYa_b1_contig_43641 (1..429) consensus	227.414	0.00114498	0.0452717	1
LYa_b1_contig_351072 (128..734) consensus	227.255	0.00221962	0.0686823	1
LYa_b1_contig_293697 (188..2422) consensus	226.875	1.35098e-06	0.000345228	0
LYa_b1_contig_22552 (18..828) consensus	226.816	0.00219517	0.0681294	1
LYa_b1_contig_172183 (1..506) consensus	226.287	0.00131449	0.049241	1
LYa_b1_contig_29251 (862..2069) consensus	225.932	0.00109702	0.0439848	1
LYa_b1_contig_40975 (72..611) consensus	224.922	0.00134643	0.0500296	1
LYa_b1_contig_1809 (151..1004) consensus	223.675	1.77278e-09	1.61027e-06	0
LYa_b1_contig_9173 (1..818) consensus	223.17	0.00148002	0.053117	1
LYa_b1_contig_161513 (1872..3006) consensus	221.667	0.00235663	0.0711374	1
LYa_b1_contig_22213 (44..1334) consensus	220.376	0.00151866	0.0539034	1
LYa_b1_contig_26111 (1..206) consensus	220.269	0.00113727	0.0450918	1
LYa_b1_contig_16275 (814..3784) consensus	220.244	0.00233146	0.0707841	1
LYa_b1_contig_23979 (1..863) consensus	220.139	1.28193e-08	8.37158e-06	0
LYa_b1_contig_2811 (1..1487) consensus	219.412	4.83966e-14	1.93424e-10	0
LYa_b1_contig_256868 (373..1191) consensus	218.873	0.00243216	0.0726709	1
LYa_b1_contig_13998 (15..634) consensus	217.388	0.0012448	0.0475856	1
LYa_b1_contig_5746 (1..583) consensus	217.222	0.00144605	0.0525586	1
LYa_b1_contig_296267 (1..1900) consensus	217.165	0.00154971	0.0546468	1
LYa_b1_contig_22213 (2433..3696) consensus	216.811	0.00153551	0.0542701	1
LYa_b1_contig_32319 (75..699) consensus	215.862	0.0023951	0.071886	1
LYa_b1_contig_1566 (1..492) consensus	214.182	0.00139474	0.0512907	1
LYa_b1_contig_298379 (63..675) consensus	214.028	0.0027419	0.0779482	1
LYa_b1_contig_23422 (275..625) consensus	213.708	0.00147989	0.053117	1
LYa_b1_contig_349423 (1..480) consensus	213.284	0.00257985	0.0751514	1
LYa_b1_contig_66337 (1..501) consensus	213.284	0.00257986	0.0751514	1
LYa_b1_contig_189514 (9..363) consensus	211.355	0.00185768	0.0614812	1
LYa_b1_contig_20590 (1..1277) consensus	210.499	0.00245659	0.0730789	1
LYa_b1_contig_349764 (1..348) consensus	210.49	0.00267622	0.0769826	1
LYa_b1_contig_204037 (290..699) consensus	210.49	0.00267809	0.0769826	1
LYa_b1_contig_228936 (7..901) consensus	210.49	0.00267894	0.0769826	1
LYa_b1_contig_9203 (65..939) consensus	210.06	0.00157578	0.0552516	1
LYa_b1_contig_45186 (1..502) consensus	209.698	0.0023088	0.0703954	1
LYa_b1_contig_55555 (10..437) consensus	209.502	0.00208583	0.0660144	1
LYa_b1_contig_45152 (1..309) consensus	209.29	0.00263937	0.0763461	1
LYa_b1_contig_297441 (190..505) consensus	208.107	0.00303823	0.0831624	1
LYa_b1_contig_3973 (18..772) consensus	207.869	0.00257939	0.0751514	1
LYa_b1_contig_350942 (49..354) consensus	207.696	0.00273719	0.0778726	1
LYa_b1_contig_349412 (1..334) consensus	207.696	0.00273699	0.0778726	1
LYa_b1_contig_17858 (1..399) consensus	207.23	0.00161278	0.0561471	1
LYa_b1_contig_150300 (1481..1853) consensus	205.146	0.00311405	0.084527	1
LYa_b1_contig_299009 (61..761) consensus	205.146	0.00311502	0.0845302	1
LYa_b1_contig_66385 (160..1322) consensus	205.057	0.0017172	0.0583195	1
LYa_b1_contig_26924 (157..895) consensus	204.908	0.00272056	0.0776179	1
LYa_b1_contig_67186 (1..454) consensus	202.108	0.00287591	0.0803958	1
LYa_b1_contig_349415 (2816..3432) consensus	202.108	0.00287763	0.080403	1
LYa_b1_contig_351780 (1..523) consensus	199.313	0.00302445	0.0829893	1
LYa_b1_contig_296605 (68..319) consensus	199.225	0.00329474	0.0872713	1
LYa_b1_contig_208083 (758..1122) consensus	199.225	0.00329639	0.0872713	1
LYa_b1_contig_153180 (50..469) consensus	199.225	0.00329624	0.0872713	1
LYa_b1_contig_296432 (1451..1903) consensus	199.225	0.00329574	0.0872713	1
LYa_b1_contig_1175 (957..1585) consensus	199.055	0.00177604	0.0597291	1
LYa_b1_contig_281898 (44..584) consensus	198.461	0.00320947	0.0859803	1
LYa_b1_contig_46833 (37..2106) consensus	198.443	0.00145216	0.0526186	1
LYa_b1_contig_87676 (1..422) consensus	198.335	0.00302282	0.0829893	1
LYa_b1_contig_13037 (1275..2308) consensus	198.335	0.00302313	0.0829893	1
LYa_b1_contig_54039 (1..890) consensus	196.914	0.00298983	0.0824543	1
LYa_b1_contig_297927 (115..696) consensus	196.264	0.00340753	0.0889412	1
LYa_b1_contig_106280 (1..240) consensus	195.22	0.0025005	0.073793	1
LYa_b1_contig_27555 (170..482) consensus	193.954	0.00317601	0.0855901	1
LYa_b1_contig_22519 (260..810) consensus	193.954	0.00317611	0.0855901	1
LYa_b1_contig_352200 (19..270) consensus	193.725	0.00316801	0.0855039	1
LYa_b1_contig_161513 (19..1139) consensus	193.725	0.003173	0.0855901	1
LYa_b1_contig_122928 (42..323) consensus	192.288	0.00173517	0.0587698	1
LYa_b1_contig_27660 (147..881) consensus	191.763	0.00325122	0.0865706	1
LYa_b1_contig_89516 (1..698) consensus	191.007	0.00221155	0.0684752	1
LYa_b1_contig_349863 (1..208) consensus	190.931	0.00328708	0.0871634	1
LYa_b1_contig_296326 (1..282) consensus	190.343	0.00359925	0.0919975	1
LYa_b1_contig_296561 (129..688) consensus	190.343	0.00359838	0.0919975	1
LYa_b1_contig_27911 (1..594) consensus	190.211	0.00183303	0.0608873	1
LYa_b1_contig_104250 (47..753) consensus	189.369	0.00191596	0.0628275	1
LYa_b1_contig_52018 (241..588) consensus	189.144	0.001991	0.0642341	1
LYa_b1_contig_36417 (98..1068) consensus	188.612	0.00228793	0.0700314	1
LYa_b1_contig_302479 (237..978) consensus	188.379	0.00227342	0.0697639	1
LYa_b1_contig_23725 (258..1253) consensus	188.151	0.00322418	0.0861125	1
LYa_b1_contig_336928 (2..551) consensus	188.136	0.0034351	0.0895205	1
LYa_b1_contig_17143 (1856..2908) consensus	187.837	0.00195187	0.0634222	1
LYa_b1_contig_299130 (1..325) consensus	187.382	0.00362574	0.0923449	1
LYa_b1_contig_11686 (1..363) consensus	185.849	0.00206299	0.0657471	1
LYa_b1_contig_36573 (664..1340) consensus	185.682	0.0033448	0.0880588	1
LYa_b1_contig_260205 (311..1111) consensus	185.342	0.00358777	0.0919403	1
LYa_b1_contig_15210 (89..515) consensus	185.19	0.00345159	0.0897011	1
LYa_b1_contig_42717 (471..2445) consensus	185.19	0.00345087	0.0897011	1
LYa_b1_contig_296674 (510..1117) consensus	184.421	0.00377391	0.0950288	1
LYa_b1_contig_21332 (59..725) consensus	183.948	0.00198819	0.064226	1
LYa_b1_contig_102231 (1..1135) consensus	183.854	0.00234187	0.0709275	1
LYa_b1_contig_241225 (13..1187) consensus	183.658	0.00369255	0.0935221	1
LYa_b1_contig_58388 (184..1320) consensus	183.651	2.24263e-10	2.91006e-07	0
LYa_b1_contig_72052 (102..459) consensus	182.999	0.00352411	0.0908252	1
LYa_b1_contig_26471 (2516..3296) consensus	182.999	0.00352425	0.0908252	1
LYa_b1_contig_116408 (8046..8363) consensus	181.852	0.00237282	0.0714104	1
LYa_b1_contig_298481 (22..472) consensus	181.663	0.00246217	0.0730954	1
LYa_b1_contig_297128 (6..503) consensus	181.461	0.00380586	0.0954484	1
LYa_b1_contig_96346 (86..1897) consensus	181.183	0.00292135	0.0811887	1
LYa_b1_contig_101018 (282..1548) consensus	180.928	0.0019357	0.0631224	1
LYa_b1_contig_48204 (1..474) consensus	180.808	0.00351702	0.0907122	1
LYa_b1_contig_14394 (2675..3576) consensus	180.367	0.00275917	0.0782086	1
LYa_b1_contig_40912 (11..4284) consensus	180.027	1.08897e-10	1.49049e-07	0
LYa_b1_contig_349415 (2230..2803) consensus	179.754	0.00393406	0.0974301	1
LYa_b1_contig_33000 (4..711) consensus	179.387	0.00346508	0.0899499	1
LYa_b1_contig_66336 (145..594) consensus	178.618	0.00362415	0.0923449	1
LYa_b1_contig_42174 (1..698) consensus	178.618	0.00362458	0.0923449	1
LYa_b1_contig_29810 (1..642) consensus	178.55	0.00215059	0.0672756	1
LYa_b1_contig_297391 (49..1640) consensus	178.5	0.00385839	0.0963066	1
LYa_b1_contig_28042 (4..668) consensus	178.25	0.00190919	0.0626465	1
LYa_b1_contig_12811 (1..355) consensus	177.756	0.00237167	0.0714104	1
LYa_b1_contig_9768 (1316..3915) consensus	177.496	1.91715e-11	3.30266e-08	0
LYa_b1_contig_350688 (30..702) consensus	176.96	0.00406355	0.0991855	1
LYa_b1_contig_10202 (441..1299) consensus	176.761	1.51495e-06	0.000377475	0
LYa_b1_contig_11144 (1..336) consensus	176.646	5.37644e-10	5.9688e-07	0
LYa_b1_contig_63116 (1..1099) consensus	176.147	0.00224491	0.0692018	1
LYa_b1_contig_73183 (2088..3481) consensus	175.539	0.00398933	0.0981527	1
LYa_b1_contig_3365 (823..1239) consensus	175.461	0.00256968	0.0750298	1
LYa_b1_contig_281898 (1294..1678) consensus	174.777	0.00388032	0.0966847	1
LYa_b1_contig_298724 (1..216) consensus	174.236	0.00368654	0.0934883	1
LYa_b1_contig_350268 (1..396) consensus	174.165	0.00418368	0.100811	1
LYa_b1_contig_350788 (374..1099) consensus	174.165	0.00418389	0.100811	1
LYa_b1_contig_350214 (1..741) consensus	174.165	0.00418429	0.100811	1
LYa_b1_contig_302766 (54..936) consensus	174.118	0.00300009	0.0826568	1
LYa_b1_contig_28285 (82..1377) consensus	174.028	4.39839e-07	0.00014698	0
LYa_b1_contig_44554 (1..318) consensus	173.923	0.00344584	0.0896599	1
LYa_b1_contig_118086 (303..1651) consensus	173.574	0.00290842	0.0809916	1
LYa_b1_contig_298093 (36..550) consensus	172.579	0.00418272	0.100811	1
LYa_b1_contig_149002 (87..1194) consensus	172.579	0.00418385	0.100811	1
LYa_b1_contig_12063 (1011..2275) consensus	171.403	0.0024371	0.072775	1
LYa_b1_contig_184440 (804..1183) consensus	171.371	0.00433534	0.102964	1
LYa_b1_contig_102742 (1238..1864) consensus	170.547	0.00237681	0.0714786	1
LYa_b1_contig_76292 (1..601) consensus	169.848	0.00255684	0.0748081	1
LYa_b1_contig_296695 (164..1207) consensus	169.618	0.00443727	0.104738	1
LYa_b1_contig_84241 (15..700) consensus	169.457	0.00425732	0.101779	1
LYa_b1_contig_147174 (391..988) consensus	168.577	0.00447964	0.105364	1
LYa_b1_contig_350235 (74..722) consensus	168.577	0.00447908	0.105364	1
LYa_b1_contig_349802 (32..763) consensus	168.577	0.00447803	0.105364	1
LYa_b1_contig_14917 (15..714) consensus	167.663	0.00393428	0.0974301	1
LYa_b1_contig_37011 (1..776) consensus	167.663	0.00393461	0.0974301	1
LYa_b1_contig_82988 (1..441) consensus	166.572	0.00239376	0.071886	1
LYa_b1_contig_242340 (1227..1913) consensus	166.496	0.00448851	0.105547	1
LYa_b1_contig_34854 (491..1202) consensus	166.449	0.00237235	0.0714104	1
LYa_b1_contig_25252 (593..1368) consensus	165.784	0.00254385	0.0745588	1
LYa_b1_contig_349772 (834..1988) consensus	165.783	0.00452733	0.106062	1
LYa_b1_contig_49866 (41..934) consensus	165.472	0.00402171	0.0985251	1
LYa_b1_contig_19560 (1..769) consensus	164.407	0.00293587	0.0814383	1
LYa_b1_contig_296432 (2184..2624) consensus	163.697	0.00488392	0.111055	1
LYa_b1_contig_99441 (32..574) consensus	163.686	0.00224505	0.0692018	1
LYa_b1_contig_301651 (1..234) consensus	163.558	0.00277363	0.0785071	1
LYa_b1_contig_12385 (57..483) consensus	163.541	1.23933e-06	0.000324636	0
LYa_b1_contig_351665 (20..579) consensus	162.989	0.00467716	0.108102	1
LYa_b1_contig_32439 (1..999) consensus	162.989	0.00467709	0.108102	1
LYa_b1_contig_351242 (1..1164) consensus	162.989	0.00467677	0.108102	1
LYa_b1_contig_7652 (1..583) consensus	162.78	0.00271633	0.0775661	1
LYa_b1_contig_44035 (1..1248) consensus	161.809	0.0028098	0.0792168	1
LYa_b1_contig_51391 (1..1019) consensus	161.578	0.0028106	0.0792169	1
LYa_b1_contig_5977 (1..508) consensus	160.736	0.00509331	0.113835	1
LYa_b1_contig_296413 (127..830) consensus	160.118	0.00294636	0.0815706	1
LYa_b1_contig_84756 (854..1166) consensus	160.115	0.00350689	0.0905726	1
LYa_b1_contig_10798 (457..1875) consensus	158.9	0.00441169	0.104282	1
LYa_b1_contig_245539 (580..1420) consensus	158.467	0.00292596	0.0812535	1
LYa_b1_contig_1966 (18..1545) consensus	158.42	0.00333939	0.0880321	1
LYa_b1_contig_57753 (104..345) consensus	158.079	0.0031777	0.0856035	1
LYa_b1_contig_82700 (198..644) consensus	157.791	0.00301716	0.082956	1
LYa_b1_contig_9620 (1..520) consensus	157.775	0.00552569	0.119773	1
LYa_b1_contig_350341 (5..304) consensus	157.4	0.00482925	0.110265	1
LYa_b1_contig_11532 (43..336) consensus	157.223	4.06999e-07	0.00013785	0
LYa_b1_contig_14470 (1..696) consensus	156.709	0.00455205	0.106438	1
LYa_b1_contig_1219 (16..731) consensus	156.03	1.3079e-07	5.53731e-05	0
LYa_b1_contig_102157 (565..1358) consensus	155.977	0.00355344	0.0913653	1
LYa_b1_contig_188237 (48..391) consensus	155.418	0.00400535	0.0983531	1
LYa_b1_contig_47902 (1..231) consensus	155.037	0.00251387	0.0740715	1
LYa_b1_contig_209629 (1..339) consensus	155.013	0.00438716	0.103898	1
LYa_b1_contig_299436 (1..233) consensus	154.853	0.00332451	0.0878064	1
LYa_b1_contig_300380 (35..436) consensus	154.84	0.00321124	0.0859803	1
LYa_b1_contig_204975 (3..236) consensus	154.815	0.00572849	0.122458	1
LYa_b1_contig_350484 (1..306) consensus	154.606	0.00497639	0.112342	1
LYa_b1_contig_349546 (1361..2575) consensus	154.606	0.00497643	0.112342	1
LYa_b1_contig_104936 (240..803) consensus	154.518	0.00466841	0.108024	1
LYa_b1_contig_98324 (1..476) consensus	152.828	0.0032199	0.0860463	1
LYa_b1_contig_112942 (256..746) consensus	152.604	0.00261712	0.0758607	1
LYa_b1_contig_296266 (1276..1550) consensus	152.544	0.00325992	0.0866963	1
LYa_b1_contig_3109 (28..770) consensus	152.532	0.00310169	0.0844437	1
LYa_b1_contig_18141 (64..683) consensus	152.327	0.00482301	0.110173	1
LYa_b1_contig_15919 (117..3130) consensus	152.254	6.47213e-07	0.000193614	0
LYa_b1_contig_350884 (1..766) consensus	151.812	0.00520534	0.11558	1
LYa_b1_contig_299403 (450..1233) consensus	151.812	0.00520548	0.11558	1
LYa_b1_contig_296518 (1..846) consensus	151.693	0.005502	0.119534	1
LYa_b1_contig_55525 (1..1146) consensus	151.103	0.00316038	0.0854132	1
LYa_b1_contig_156686 (26..598) consensus	150.237	0.00422764	0.10134	1
LYa_b1_contig_111928 (74..591) consensus	149.711	0.00264733	0.0765087	1
LYa_b1_contig_38899 (153..759) consensus	149.347	0.00305861	0.0835212	1
LYa_b1_contig_2601 (325..872) consensus	149.209	0.00319743	0.0859033	1
LYa_b1_contig_98925 (1..539) consensus	149.201	0.00360099	0.0919975	1
LYa_b1_contig_299248 (1..326) consensus	149.018	0.00558399	0.120503	1
LYa_b1_contig_411 (18..590) consensus	148.843	0.00354188	0.0911855	1
LYa_b1_contig_42337 (31..382) consensus	147.946	0.00515056	0.114769	1
LYa_b1_contig_114625 (637..1553) consensus	147.601	0.00455299	0.106438	1
LYa_b1_contig_100548 (12..298) consensus	147.19	0.00460771	0.107245	1
LYa_b1_contig_102685 (30..387) consensus	147.186	0.0027322	0.0777973	1
LYa_b1_contig_87664 (38..368) consensus	146.758	1.83009e-11	3.20799e-08	0
LYa_b1_contig_9370 (83..497) consensus	146.393	0.00566925	0.12166	1
LYa_b1_contig_12353 (1..223) consensus	146.223	0.00591739	0.125078	1
LYa_b1_contig_350320 (63..1332) consensus	146.223	0.00591687	0.125078	1
LYa_b1_contig_100750 (408..984) consensus	145.933	0.00617287	0.128161	1
LYa_b1_contig_76268 (187..1334) consensus	145.755	0.00525371	0.116238	1
LYa_b1_contig_125814 (1190..1921) consensus	145.442	0.00347801	0.0900983	1
LYa_b1_contig_298641 (1..352) consensus	144.654	0.00367086	0.0932564	1
LYa_b1_contig_62767 (1..311) consensus	143.564	0.005496	0.119482	1
LYa_b1_contig_63365 (5..381) consensus	143.429	0.00621842	0.128501	1
LYa_b1_contig_81946 (57..806) consensus	143.429	0.00621767	0.128501	1
LYa_b1_contig_296025 (38..294) consensus	142.972	0.00640182	0.131026	1
LYa_b1_contig_296126 (177..607) consensus	142.972	0.00640208	0.131026	1
LYa_b1_contig_40203 (1..464) consensus	142.972	0.0063986	0.131009	1
LYa_b1_contig_61571 (124..1243) consensus	142.459	0.00355677	0.0914038	1
LYa_b1_contig_46168 (7..248) consensus	142.125	0.00350429	0.0905633	1
LYa_b1_contig_2042 (436..1188) consensus	141.849	0.00415768	0.100594	1
LYa_b1_contig_32123 (371..1088) consensus	141.373	0.00572191	0.122422	1
LYa_b1_contig_213237 (49..418) consensus	140.635	0.00646049	0.131741	1
LYa_b1_contig_256868 (1501..1947) consensus	140.635	0.00646	0.131741	1
LYa_b1_contig_100455 (1..305) consensus	140.192	0.00350987	0.0905947	1
LYa_b1_contig_59702 (195..4478) consensus	140.032	0.0036128	0.092227	1
LYa_b1_contig_124253 (1..663) consensus	140.011	0.00659668	0.133451	1
LYa_b1_contig_52349 (13..3783) consensus	139.188	7.61635e-10	8.36258e-07	0
LYa_b1_contig_41008 (27..392) consensus	139.182	0.00610868	0.127379	1
LYa_b1_contig_12531 (98..535) consensus	139.182	0.00610911	0.127379	1
LYa_b1_contig_46863 (491..1316) consensus	139.167	1.85051e-05	0.00251217	1
LYa_b1_contig_47778 (14..1896) consensus	138.529	0.00327035	0.0868582	1
LYa_b1_contig_350034 (1..726) consensus	138.249	0.00577932	0.12307	1
LYa_b1_contig_311211 (57..349) consensus	138.068	0.00409036	0.0995112	1
LYa_b1_contig_117049 (493..703) consensus	137.841	0.00687788	0.136706	1
LYa_b1_contig_25751 (3956..4398) consensus	137.841	0.00688138	0.13672	1
LYa_b1_contig_349546 (218..1322) consensus	137.841	0.00688143	0.13672	1
LYa_b1_contig_297681 (98..323) consensus	137.051	0.00674079	0.135063	1
LYa_b1_contig_298825 (2..359) consensus	137.051	0.00674393	0.135063	1
LYa_b1_contig_10202 (3..375) consensus	137.051	0.00674436	0.135063	1
LYa_b1_contig_114312 (41..572) consensus	137.051	0.00674305	0.135063	1
LYa_b1_contig_96655 (1..1149) consensus	137.024	4.77032e-07	0.000156234	0
LYa_b1_contig_8300 (370..592) consensus	136.991	0.00624383	0.12879	1
LYa_b1_contig_46576 (1..930) consensus	136.991	0.00624152	0.128769	1
LYa_b1_contig_45585 (1..468) consensus	136.9	0.00461928	0.10741	1
LYa_b1_contig_94759 (195..723) consensus	136.546	0.00327682	0.0869615	1
LYa_b1_contig_412528 (58..273) consensus	136.443	1.6902e-05	0.00234878	1
LYa_b1_contig_296772 (1..403) consensus	136.43	0.0040863	0.0994609	1
LYa_b1_contig_118023 (26..246) consensus	136.106	0.00394888	0.0975418	1
LYa_b1_contig_180577 (8..992) consensus	136.065	7.94019e-06	0.00134012	1
LYa_b1_contig_93974 (22..1384) consensus	135.158	1.35548e-06	0.000345494	0
LYa_b1_contig_351000 (133..562) consensus	135.047	0.00707369	0.138856	1
LYa_b1_contig_301451 (2..367) consensus	134.945	0.00457056	0.106699	1
LYa_b1_contig_76478 (267..1218) consensus	134.813	0.00332801	0.0878527	1
LYa_b1_contig_17143 (1..791) consensus	134.515	0.00390221	0.0971333	1
LYa_b1_contig_302880 (1..296) consensus	134.09	0.00715371	0.139658	1
LYa_b1_contig_297311 (19..382) consensus	134.09	0.00715532	0.139662	1
LYa_b1_contig_142255 (41..1919) consensus	134.09	0.00716287	0.139711	1
LYa_b1_contig_7157 (7..284) consensus	133.938	0.00492153	0.111632	1
LYa_b1_contig_55156 (125..668) consensus	133.688	0.00357875	0.0917798	1
LYa_b1_contig_150300 (148..527) consensus	133.328	0.00690299	0.13693	1
LYa_b1_contig_13136 (71..616) consensus	133.217	3.94839e-14	1.71525e-10	0
LYa_b1_contig_103320 (1..763) consensus	133.014	0.00368373	0.0934645	1
LYa_b1_contig_44392 (3..361) consensus	132.888	0.00362568	0.0923449	1
LYa_b1_contig_73788 (80..620) consensus	132.609	0.00666226	0.134261	1
LYa_b1_contig_8943 (1865..2557) consensus	132.279	0.0048434	0.110457	1
LYa_b1_contig_350712 (144..637) consensus	132.252	0.00732903	0.141314	1
LYa_b1_contig_5541 (1..375) consensus	131.481	0.00407201	0.0993065	1
LYa_b1_contig_301498 (440..732) consensus	131.129	0.00720206	0.139973	1
LYa_b1_contig_22213 (1339..2317) consensus	130.84	0.00422748	0.10134	1
LYa_b1_contig_19911 (1..201) consensus	130.238	0.00400262	0.0983344	1
LYa_b1_contig_35256 (373..1368) consensus	130.163	1.31952e-05	0.00199409	1
LYa_b1_contig_14581 (185..678) consensus	130.085	0.00459582	0.107114	1
LYa_b1_contig_2448 (4..740) consensus	129.944	1.29254e-06	0.000331993	0
LYa_b1_contig_76394 (9..666) consensus	129.889	0.00382459	0.0956781	1
LYa_b1_contig_32441 (809..1451) consensus	129.727	0.00437478	0.103679	1
LYa_b1_contig_21044 (1..1490) consensus	129.603	1.58683e-17	1.5855e-13	0
LYa_b1_contig_78930 (1..305) consensus	129.432	0.00553422	0.119921	1
LYa_b1_contig_10378 (1937..2556) consensus	128.669	0.00545612	0.118925	1
LYa_b1_contig_83468 (479..908) consensus	128.228	0.00702776	0.138284	1
LYa_b1_contig_35325 (624..1202) consensus	128.228	0.0070285	0.138284	1
LYa_b1_contig_142418 (1..314) consensus	128.169	0.00754941	0.143678	1
LYa_b1_contig_60392 (1167..1514) consensus	128.169	0.00754543	0.143657	1
LYa_b1_contig_303025 (7..378) consensus	128.169	0.00754548	0.143657	1
LYa_b1_contig_145858 (74..1783) consensus	128.095	0.00461228	0.107311	1
LYa_b1_contig_131987 (1..218) consensus	128.085	0.00522911	0.115924	1
LYa_b1_contig_88841 (43..510) consensus	127.847	0.00689897	0.136905	1
LYa_b1_contig_41076 (1..235) consensus	127.787	0.00484361	0.110457	1
LYa_b1_contig_27455 (674..1642) consensus	127.145	0.00537747	0.117948	1
LYa_b1_contig_328609 (78..836) consensus	126.833	0.00746306	0.142714	1
LYa_b1_contig_48452 (730..1315) consensus	126.669	0.00459219	0.107054	1
LYa_b1_contig_349792 (2979..3636) consensus	126.664	0.00784324	0.147393	1
LYa_b1_contig_55695 (301..727) consensus	125.856	0.00430191	0.102536	1
LYa_b1_contig_114312 (791..1113) consensus	125.208	0.00788821	0.147798	1
LYa_b1_contig_297148 (27..395) consensus	125.208	0.00788759	0.147798	1
LYa_b1_contig_296077 (1..631) consensus	125.208	0.00789302	0.147851	1
LYa_b1_contig_124220 (295..994) consensus	125.208	0.00788871	0.147798	1
LYa_b1_contig_49645 (45..454) consensus	124.797	1.15579e-09	1.14339e-06	0
LYa_b1_contig_93853 (34..833) consensus	124.421	0.00475658	0.109355	1
LYa_b1_contig_297032 (1..255) consensus	124.402	0.00644896	0.131689	1
LYa_b1_contig_102780 (1..2157) consensus	124.402	0.00645094	0.131703	1
LYa_b1_contig_170704 (4414..4872) consensus	124.208	0.00718162	0.13982	1
LYa_b1_contig_350080 (481..810) consensus	123.87	0.0080251	0.149179	1
LYa_b1_contig_29013 (50..677) consensus	123.846	0.00736807	0.141765	1
LYa_b1_contig_89128 (1..363) consensus	123.831	0.00543776	0.118743	1
LYa_b1_contig_26218 (1..254) consensus	123.092	0.00436428	0.103504	1
LYa_b1_contig_71636 (1..573) consensus	123.033	2.0117e-06	0.000467443	0
LYa_b1_contig_21148 (72..314) consensus	122.572	0.0040854	0.0994609	1
LYa_b1_contig_297237 (24..493) consensus	122.247	0.00845253	0.153614	1
LYa_b1_contig_242340 (1924..2606) consensus	122.247	0.00845129	0.153614	1
LYa_b1_contig_119883 (1..363) consensus	121.955	0.00496512	0.112165	1
LYa_b1_contig_45947 (2..650) consensus	121.898	1.28374e-12	3.37543e-09	0
LYa_b1_contig_54229 (33..411) consensus	121.711	0.00500115	0.112535	1
LYa_b1_contig_87911 (8..221) consensus	121.655	0.00742813	0.142427	1
LYa_b1_contig_26471 (1820..2437) consensus	121.655	0.00742794	0.142427	1
LYa_b1_contig_218321 (30..563) consensus	121.583	0.00708755	0.138991	1
LYa_b1_contig_246813 (811..1142) consensus	121.076	0.0082022	0.150995	1
LYa_b1_contig_142405 (1870..2958) consensus	121.076	0.00820209	0.150995	1
LYa_b1_contig_349821 (60..1195) consensus	121.076	0.00820291	0.150995	1
LYa_b1_contig_72935 (25..761) consensus	120.901	3.96366e-07	0.000134981	0
LYa_b1_contig_146676 (384..648) consensus	120.468	0.00567237	0.121675	1
LYa_b1_contig_78968 (178..1118) consensus	119.452	0.00495335	0.112023	1
LYa_b1_contig_297314 (84..364) consensus	119.287	0.00874274	0.156444	1
LYa_b1_contig_296509 (152..544) consensus	119.287	0.00874233	0.156444	1
LYa_b1_contig_296085 (518..1304) consensus	119.287	0.0087507	0.156495	1
LYa_b1_contig_296666 (452..1484) consensus	119.287	0.00874949	0.156495	1
LYa_b1_contig_58517 (404..1219) consensus	119.06	3.2152e-06	0.000670181	1
LYa_b1_contig_61841 (1..340) consensus	119.029	0.00592325	0.125148	1
LYa_b1_contig_301314 (37..286) consensus	118.965	0.00796877	0.148657	1
LYa_b1_contig_29917 (914..1479) consensus	118.753	0.00525812	0.116258	1
LYa_b1_contig_8018 (1..1498) consensus	118.714	8.58221e-09	6.16906e-06	0
LYa_b1_contig_61048 (24..310) consensus	118.657	0.00526762	0.116295	1
LYa_b1_contig_25911 (1..559) consensus	118.451	0.00811846	0.150049	1
LYa_b1_contig_116408 (6326..6752) consensus	118.281	0.00862862	0.155394	1
LYa_b1_contig_70543 (3462..3909) consensus	118.281	0.00862924	0.155394	1
LYa_b1_contig_25751 (306..863) consensus	118.281	0.00863054	0.155394	1
LYa_b1_contig_351887 (4..668) consensus	118.281	0.00862343	0.155394	1
LYa_b1_contig_304879 (1..1033) consensus	118.281	0.00862307	0.155394	1
LYa_b1_contig_62658 (1444..3530) consensus	117.356	3.37191e-08	1.87171e-05	0
LYa_b1_contig_4467 (61..534) consensus	117.323	0.005345	0.117477	1
LYa_b1_contig_2601 (3682..4087) consensus	116.725	0.00538353	0.117955	1
LYa_b1_contig_66065 (1..2318) consensus	116.39	1.21114e-08	8.04269e-06	0
LYa_b1_contig_298439 (6..260) consensus	116.362	0.00554754	0.120002	1
LYa_b1_contig_270719 (1..307) consensus	116.326	0.00914631	0.160463	1
LYa_b1_contig_133368 (1..540) consensus	116.326	0.00914562	0.160463	1
LYa_b1_contig_45482 (673..1033) consensus	115.98	0.00579376	0.123273	1
LYa_b1_contig_65536 (58..388) consensus	115.868	0.00553993	0.119946	1
LYa_b1_contig_349833 (1..226) consensus	115.487	0.00898143	0.158717	1
LYa_b1_contig_12882 (199..873) consensus	115.487	0.00898104	0.158717	1
LYa_b1_contig_350921 (90..961) consensus	115.487	0.00897943	0.158717	1
LYa_b1_contig_38558 (1..253) consensus	115.082	0.00843981	0.153518	1
LYa_b1_contig_84949 (1..1035) consensus	115.082	0.00844246	0.153538	1
LYa_b1_contig_99158 (246..573) consensus	114.929	0.00554062	0.119946	1
LYa_b1_contig_60566 (986..1367) consensus	114.279	0.00679628	0.135513	1
LYa_b1_contig_251050 (55..1470) consensus	114.057	0.00597214	0.12565	1
LYa_b1_contig_188870 (1639..3860) consensus	113.894	6.28864e-07	0.000189871	0
LYa_b1_contig_297858 (19..694) consensus	113.73	0.00582762	0.123756	1
LYa_b1_contig_237092 (193..482) consensus	113.365	0.00959326	0.164795	1
LYa_b1_contig_296437 (1624..1963) consensus	113.365	0.00960745	0.164795	1
LYa_b1_contig_301506 (520..1081) consensus	113.365	0.00960732	0.164795	1
LYa_b1_contig_21416 (56..366) consensus	112.891	0.00891553	0.158224	1
LYa_b1_contig_297291 (1..332) consensus	112.722	0.00800752	0.148963	1
LYa_b1_contig_111270 (1..394) consensus	112.532	0.00596393	0.12561	1
LYa_b1_contig_112300 (126..872) consensus	112.269	0.00487544	0.110914	1
LYa_b1_contig_206698 (69..426) consensus	112.248	0.00507504	0.113598	1
LYa_b1_contig_167005 (133..526) consensus	112.054	0.00528896	0.116604	1
LYa_b1_contig_48766 (1..309) consensus	111.733	0.00479621	0.109787	1
LYa_b1_contig_44873 (25..893) consensus	111.724	0.00676191	0.135179	1
LYa_b1_contig_159065 (5..930) consensus	111.512	4.24368e-05	0.00460382	1
LYa_b1_contig_350135 (101..1448) consensus	111.512	4.24259e-05	0.00460382	1
LYa_b1_contig_73998 (1..300) consensus	110.928	7.67852e-07	0.00021948	0
LYa_b1_contig_31388 (1784..3275) consensus	110.906	0.00849057	0.153992	1
LYa_b1_contig_64761 (404..797) consensus	110.7	0.00931877	0.162183	1
LYa_b1_contig_114861 (13..454) consensus	110.7	0.00931291	0.162148	1
LYa_b1_contig_296783 (50..279) consensus	110.405	0.0099334	0.168318	1
LYa_b1_contig_298993 (12..363) consensus	110.405	0.00993519	0.168318	1
LYa_b1_contig_260580 (22..719) consensus	110.405	0.00993574	0.168318	1
LYa_b1_contig_65478 (177..976) consensus	110.405	0.00993861	0.168338	1
LYa_b1_contig_57204 (28..441) consensus	110.142	0.00598719	0.125816	1
LYa_b1_contig_24227 (2823..3623) consensus	109.972	0.00604808	0.126779	1
LYa_b1_contig_351598 (1..262) consensus	109.899	0.00992813	0.168275	1
LYa_b1_contig_43806 (18..786) consensus	109.875	0.0050404	0.113096	1
LYa_b1_contig_36335 (240..805) consensus	109.6	0.00794662	0.148439	1
LYa_b1_contig_60887 (292..771) consensus	109.559	0.00516706	0.114997	1
LYa_b1_contig_67779 (351..731) consensus	109.544	0.00604239	0.126712	1
LYa_b1_contig_21675 (19..433) consensus	109.337	0.00652061	0.132502	1
LYa_b1_contig_17454 (3017..4647) consensus	109.33	2.157e-08	1.26776e-05	0
LYa_b1_contig_55093 (1039..1327) consensus	109.043	0.00507528	0.113598	1
LYa_b1_contig_153479 (1167..2133) consensus	108.881	1.71593e-06	0.000413131	0
LYa_b1_contig_106385 (65..1040) consensus	108.447	0.00610264	0.127379	1
LYa_b1_contig_52021 (960..1422) consensus	108.353	0.00610872	0.127379	1
LYa_b1_contig_2601 (3023..3459) consensus	108.348	0.00615933	0.128052	1
LYa_b1_contig_77899 (1..373) consensus	108.301	0.0054716	0.119143	1
LYa_b1_contig_10234 (378..815) consensus	107.738	0.00676653	0.13519	1
LYa_b1_contig_95994 (1..505) consensus	107.712	0.00540456	0.118247	1
LYa_b1_contig_144678 (25..418) consensus	107.444	0.0105645	0.174453	1
LYa_b1_contig_296189 (533..1035) consensus	107.444	0.0105668	0.174453	1
LYa_b1_contig_296763 (1..320) consensus	107.371	7.19125e-05	0.00669014	1
LYa_b1_contig_297501 (167..752) consensus	107.105	0.0104323	0.173184	1
LYa_b1_contig_4502 (1..1057) consensus	107.105	0.0104327	0.173184	1
LYa_b1_contig_54049 (25..1013) consensus	107.043	0.0054396	0.118743	1
LYa_b1_contig_59975 (1..1050) consensus	106.92	0.00973691	0.166189	1
LYa_b1_contig_306760 (132..2090) consensus	106.826	1.46187e-09	1.36508e-06	0
LYa_b1_contig_14868 (249..855) consensus	106.819	0.00567498	0.121705	1
LYa_b1_contig_302292 (115..773) consensus	106.771	6.46285e-05	0.00623905	1
LYa_b1_contig_5474 (506..854) consensus	106.752	0.00622442	0.128527	1
LYa_b1_contig_48085 (26..276) consensus	106.528	0.0078204	0.147181	1
LYa_b1_contig_37993 (364..909) consensus	106.319	0.010425	0.173114	1
LYa_b1_contig_65300 (1788..2419) consensus	106.319	0.0104231	0.173111	1
LYa_b1_contig_16057 (392..1899) consensus	106.319	0.0104203	0.173093	1
LYa_b1_contig_9575 (1..331) consensus	106.222	5.47981e-06	0.00100463	1
LYa_b1_contig_38531 (61..821) consensus	106.154	0.00627493	0.129266	1
LYa_b1_contig_91533 (1..529) consensus	105.947	0.00663672	0.13393	1
LYa_b1_contig_8943 (1035..1428) consensus	105.542	0.00717014	0.139772	1
LYa_b1_contig_48901 (1..789) consensus	105.493	0.0058622	0.124254	1
LYa_b1_contig_310046 (277..781) consensus	105.321	0.00804077	0.149331	1
LYa_b1_contig_55093 (156..616) consensus	105.25	0.00545914	0.118965	1
LYa_b1_contig_216738 (538..926) consensus	105.012	0.00667147	0.134322	1
LYa_b1_contig_29162 (9..439) consensus	104.894	0.0100033	0.16917	1
LYa_b1_contig_58423 (252..960) consensus	104.876	0.00548089	0.119309	1
LYa_b1_contig_296492 (80..503) consensus	104.484	0.0108851	0.17745	1
LYa_b1_contig_84239 (932..1448) consensus	104.484	0.0108832	0.177449	1
LYa_b1_contig_170239 (507..1364) consensus	104.484	0.0108823	0.177449	1
LYa_b1_contig_19098 (70..1116) consensus	104.424	3.83147e-13	1.27608e-09	0
LYa_b1_contig_145451 (629..1167) consensus	104.323	0.0103148	0.172142	1
LYa_b1_contig_351256 (72..470) consensus	104.31	0.0109158	0.177643	1
LYa_b1_contig_306760 (2101..2740) consensus	104.31	0.0109115	0.177643	1
LYa_b1_contig_9173 (860..1769) consensus	104.156	0.00661057	0.13359	1
LYa_b1_contig_43927 (24..1522) consensus	104.128	0.0107396	0.176142	1
LYa_b1_contig_77864 (80..508) consensus	103.941	0.00766555	0.144949	1
LYa_b1_contig_300851 (115..1047) consensus	103.939	6.18098e-06	0.00111075	1
LYa_b1_contig_19113 (107..819) consensus	103.611	3.56043e-08	1.95464e-05	0
LYa_b1_contig_297817 (23..236) consensus	102.868	0.00753421	0.143516	1
LYa_b1_contig_21147 (94..362) consensus	102.674	0.00672426	0.134966	1
LYa_b1_contig_47824 (69..483) consensus	102.121	0.00862384	0.155394	1
LYa_b1_contig_235956 (45..670) consensus	102.051	0.00708273	0.138944	1
LYa_b1_contig_6273 (419..1014) consensus	101.963	0.00723952	0.140482	1
LYa_b1_contig_89188 (1..270) consensus	101.937	0.0110121	0.178344	1
LYa_b1_contig_37739 (391..728) consensus	101.937	0.0110131	0.178344	1
LYa_b1_contig_48936 (1..277) consensus	101.887	0.00706145	0.138724	1
LYa_b1_contig_34354 (20..280) consensus	101.769	0.00685312	0.136413	1
LYa_b1_contig_302175 (155..524) consensus	101.523	0.0114449	0.182171	1
LYa_b1_contig_186685 (30..256) consensus	101.516	0.0113768	0.181564	1
LYa_b1_contig_351686 (16..303) consensus	101.516	0.0113773	0.181564	1
LYa_b1_contig_350197 (14..330) consensus	101.516	0.0113742	0.181564	1
LYa_b1_contig_349607 (383..703) consensus	101.516	0.0113745	0.181564	1
LYa_b1_contig_187334 (8..405) consensus	101.516	0.0113754	0.181564	1
LYa_b1_contig_349885 (398..813) consensus	101.516	0.0113797	0.181573	1
LYa_b1_contig_350555 (73..547) consensus	101.516	0.0113836	0.181575	1
LYa_b1_contig_142405 (1223..1841) consensus	101.516	0.0113868	0.181575	1
LYa_b1_contig_137499 (25..440) consensus	101.275	0.00780276	0.147013	1
LYa_b1_contig_209241 (745..1074) consensus	101.202	0.0103032	0.171981	1
LYa_b1_contig_184650 (1378..2043) consensus	101.202	0.0103031	0.171981	1
LYa_b1_contig_19985 (88..2156) consensus	101.122	2.50034e-12	5.80986e-09	0
LYa_b1_contig_167504 (176..646) consensus	100.988	0.0068112	0.135757	1
LYa_b1_contig_97849 (1..509) consensus	100.845	0.00606137	0.126993	1
LYa_b1_contig_10521 (117..789) consensus	100.362	0.00726269	0.140717	1
LYa_b1_contig_27319 (646..1898) consensus	100.274	5.14948e-05	0.00536512	1
LYa_b1_contig_296861 (143..620) consensus	100.232	0.00831293	0.152179	1
LYa_b1_contig_11479 (1222..1764) consensus	99.9865	0.00713549	0.139548	1
LYa_b1_contig_31895 (21..1199) consensus	99.8638	4.27282e-20	4.74358e-16	0
LYa_b1_contig_67028 (18..364) consensus	99.7525	0.0077548	0.146277	1
LYa_b1_contig_55135 (114..720) consensus	99.7459	0.0113355	0.181274	1
LYa_b1_contig_203747 (51..496) consensus	99.6651	9.16637e-05	0.00797099	1
LYa_b1_contig_56712 (67..1188) consensus	99.4706	4.46205e-08	2.35889e-05	0
LYa_b1_contig_33177 (26..606) consensus	99.4178	0.00758482	0.143995	1
LYa_b1_contig_64863 (1185..1892) consensus	99.3209	0.00609433	0.127379	1
LYa_b1_contig_106560 (15..329) consensus	98.9275	0.00650482	0.132397	1
LYa_b1_contig_61 (1..273) consensus	98.8769	0.00873527	0.156444	1
LYa_b1_contig_31334 (49..992) consensus	98.8114	0.00729874	0.141084	1
LYa_b1_contig_98763 (154..1355) consensus	98.7858	8.25774e-06	0.00137743	1
LYa_b1_contig_185534 (11..407) consensus	98.7219	0.0117733	0.185172	1
LYa_b1_contig_102018 (486..1118) consensus	98.7219	0.0117694	0.185172	1
LYa_b1_contig_209747 (430..1140) consensus	98.7219	0.0117657	0.185172	1
LYa_b1_contig_349571 (20..787) consensus	98.7219	0.0117629	0.185172	1
LYa_b1_contig_297927 (720..1127) consensus	98.5622	0.0122564	0.190143	1
LYa_b1_contig_298289 (447..872) consensus	98.5622	0.0122586	0.190143	1
LYa_b1_contig_300595 (640..1176) consensus	98.5622	0.0122567	0.190143	1
LYa_b1_contig_84239 (132..718) consensus	98.5622	0.0122612	0.190143	1
LYa_b1_contig_114596 (1..727) consensus	98.4323	0.00745882	0.142714	1
LYa_b1_contig_17963 (62..313) consensus	98.2297	0.00772761	0.145902	1
LYa_b1_contig_80849 (66..626) consensus	98.1405	0.00752043	0.143399	1
LYa_b1_contig_4262 (1..296) consensus	97.9473	3.21962e-08	1.81133e-05	0
LYa_b1_contig_19254 (17..222) consensus	97.555	0.0117301	0.184999	1
LYa_b1_contig_50285 (1..255) consensus	97.4681	0.00773572	0.145954	1
LYa_b1_contig_35181 (1..318) consensus	97.3734	0.00857059	0.154944	1
LYa_b1_contig_22948 (90..892) consensus	97.2718	0.00873013	0.156444	1
LYa_b1_contig_36466 (1..388) consensus	97.2516	1.26372e-05	0.00193516	1
LYa_b1_contig_297204 (1..403) consensus	96.9468	0.00832878	0.152345	1
LYa_b1_contig_82267 (1..222) consensus	96.5647	0.00698346	0.13787	1
LYa_b1_contig_33965 (1..329) consensus	95.9829	0.00784127	0.147393	1
LYa_b1_contig_147264 (117..322) consensus	95.9575	0.00667235	0.134322	1
LYa_b1_contig_351000 (652..968) consensus	95.9277	0.0124848	0.192425	1
LYa_b1_contig_349468 (415..790) consensus	95.9277	0.012483	0.192425	1
LYa_b1_contig_349380 (24..434) consensus	95.9277	0.0124894	0.192425	1
LYa_b1_contig_349540 (23..596) consensus	95.9277	0.012501	0.192516	1
LYa_b1_contig_11222 (1..366) consensus	95.747	0.0101247	0.170192	1
LYa_b1_contig_2924 (4422..4806) consensus	95.7441	0.00671136	0.134761	1
LYa_b1_contig_21270 (354..1049) consensus	95.6352	0.00738782	0.142008	1
LYa_b1_contig_103139 (1577..2286) consensus	95.6016	0.0126304	0.194102	1
LYa_b1_contig_155707 (225..584) consensus	95.4476	0.00702934	0.138284	1
LYa_b1_contig_58154 (25..798) consensus	95.3641	0.012102	0.188497	1
LYa_b1_contig_5419 (874..1332) consensus	95.2717	0.00803634	0.149277	1
LYa_b1_contig_32423 (202..543) consensus	95.1052	0.00668552	0.134432	1
LYa_b1_contig_21207 (7..538) consensus	94.5434	5.33529e-05	0.00549568	1
LYa_b1_contig_55093 (686..1018) consensus	94.4573	0.00747551	0.142886	1
LYa_b1_contig_26563 (437..805) consensus	94.3296	0.00805427	0.149397	1
LYa_b1_contig_67115 (123..734) consensus	94.3296	0.0080563	0.149397	1
LYa_b1_contig_88117 (9..990) consensus	93.9871	0.00795249	0.148492	1
LYa_b1_contig_26843 (1..547) consensus	93.9379	0.0114845	0.182574	1
LYa_b1_contig_89449 (1..1029) consensus	93.8046	0.000109106	0.00908271	1
LYa_b1_contig_201813 (8..465) consensus	93.7714	0.000240398	0.0157816	1
LYa_b1_contig_104038 (1511..1946) consensus	93.333	0.00838581	0.152897	1
LYa_b1_contig_93013 (1..421) consensus	93.2973	0.00692281	0.137122	1
LYa_b1_contig_12531 (620..870) consensus	93.1731	0.0123495	0.191085	1
LYa_b1_contig_69166 (132..801) consensus	93.1731	0.0123499	0.191085	1
LYa_b1_contig_43927 (1586..2930) consensus	93.1731	0.0123481	0.191085	1
LYa_b1_contig_349762 (1..250) consensus	93.1335	0.0130146	0.197505	1
LYa_b1_contig_350660 (112..433) consensus	93.1335	0.0130135	0.197505	1
LYa_b1_contig_274691 (51..777) consensus	92.8995	0.00836483	0.152669	1
LYa_b1_contig_18345 (1760..1971) consensus	92.641	0.0131369	0	1
LYa_b1_contig_297494 (21..255) consensus	92.641	0.0131341	0	1
LYa_b1_contig_296989 (7..288) consensus	92.641	0.0131375	0	1
LYa_b1_contig_297829 (19..516) consensus	92.641	0.0131322	0	1
LYa_b1_contig_58132 (25..669) consensus	92.641	0.0131317	0	1
LYa_b1_contig_247700 (1155..2303) consensus	92.641	0.0131326	0	1
LYa_b1_contig_60969 (1..327) consensus	92.5817	0.00853968	0.154574	1
LYa_b1_contig_64340 (240..615) consensus	92.3584	0.0104479	0.173249	1
LYa_b1_contig_43030 (1..389) consensus	92.2079	0.00692566	0.137122	1
LYa_b1_contig_266286 (55..324) consensus	91.749	0.00840039	0.153018	1
LYa_b1_contig_22837 (30..547) consensus	91.7223	0.00976507	0.166427	1
LYa_b1_contig_168447 (153..505) consensus	91.6221	0.00736336	0.141756	1
LYa_b1_contig_6949 (1..328) consensus	91.5607	0.00899096	0.158774	1
LYa_b1_contig_52687 (10..314) consensus	91.1909	0.0105824	0.174598	1
LYa_b1_contig_144889 (5..293) consensus	91.1678	0.0100391	0.169407	1
LYa_b1_contig_53831 (9..247) consensus	91.1006	0.00726571	0.140717	1
LYa_b1_contig_91157 (146..476) consensus	90.9967	0.00899039	0.158774	1
LYa_b1_contig_8229 (1..611) consensus	90.9584	1.22419e-05	0.00188672	1
LYa_b1_contig_30173 (286..737) consensus	90.5979	0.00861554	0.155394	1
LYa_b1_contig_131000 (73..400) consensus	90.5724	0.00985256	0.167477	1
LYa_b1_contig_5798 (274..1105) consensus	90.5724	0.00985479	0.167486	1
LYa_b1_contig_65536 (1994..2624) consensus	90.5361	0.00885137	0	1
LYa_b1_contig_350927 (4..1211) consensus	90.3393	0.013821	0.205833	1
LYa_b1_contig_77658 (155..422) consensus	90.2836	0.0106524	0.175403	1
LYa_b1_contig_9100 (995..2960) consensus	90.2813	9.63374e-12	1.92513e-08	0
LYa_b1_contig_153581 (80..429) consensus	90.1835	0.00810139	0.149927	1
LYa_b1_contig_34100 (1709..2381) consensus	89.8794	0.00880703	0	1
LYa_b1_contig_70189 (1..372) consensus	89.8563	0.00794666	0.148439	1
LYa_b1_contig_89537 (85..809) consensus	89.7939	0.00836356	0.152669	1
LYa_b1_contig_46837 (946..1785) consensus	89.7895	0.00890856	0.158224	1
LYa_b1_contig_257207 (1..216) consensus	89.6804	0.0139444	0	1
LYa_b1_contig_298658 (71..353) consensus	89.6804	0.0139258	0	1
LYa_b1_contig_298534 (14..303) consensus	89.6804	0.0139397	0	1
LYa_b1_contig_297373 (35..327) consensus	89.6804	0.0139448	0	1
LYa_b1_contig_296674 (65..433) consensus	89.6804	0.0139512	0	1
LYa_b1_contig_297215 (228..652) consensus	89.6804	0.0139506	0	1
LYa_b1_contig_116710 (1..818) consensus	89.6804	0.0139552	0	1
LYa_b1_contig_124309 (21..459) consensus	89.3812	0.00963163	0.164984	1
LYa_b1_contig_48618 (107..725) consensus	88.9441	0.00823168	0.151322	1
LYa_b1_contig_296618 (87..1176) consensus	88.7622	1.02158e-05	0.00161762	1
LYa_b1_contig_115740 (600..1112) consensus	88.7157	0.00867286	0.1558	1
LYa_b1_contig_280653 (106..398) consensus	88.7146	0.0105869	0	1
LYa_b1_contig_209850 (715..1018) consensus	88.5527	0.0102749	0	1
LYa_b1_contig_29616 (2..1694) consensus	88.5207	2.10266e-05	0.00274626	1
LYa_b1_contig_295893 (1..817) consensus	88.499	1.63979e-07	6.68738e-05	0
LYa_b1_contig_3558 (886..1722) consensus	88.3997	0.011546	0.183264	1
LYa_b1_contig_29737 (1..1462) consensus	88.3929	9.875e-09	6.90572e-06	0
LYa_b1_contig_30355 (642..893) consensus	88.1701	0.0079139	0	1
LYa_b1_contig_71746 (574..1115) consensus	88.0036	0.0102115	0.171103	1
LYa_b1_contig_64780 (207..1009) consensus	87.8064	0.0090647	0.1594	1
LYa_b1_contig_350462 (159..424) consensus	87.5451	0.0147008	0	1
LYa_b1_contig_350041 (99..407) consensus	87.5451	0.0147002	0	1
LYa_b1_contig_353967 (7..526) consensus	87.5451	0.0147018	0	1
LYa_b1_contig_351755 (1..632) consensus	87.5451	0.0147021	0	1
LYa_b1_contig_10856 (327..969) consensus	87.51	0.00850324	0.154129	1
LYa_b1_contig_136235 (291..1072) consensus	87.1597	0.00941305	0.163087	1
LYa_b1_contig_300106 (1..206) consensus	86.7197	0.0145867	0	1
LYa_b1_contig_299520 (1..266) consensus	86.7197	0.0145853	0	1
LYa_b1_contig_259985 (167..708) consensus	86.7197	0.0145855	0	1
LYa_b1_contig_461603 (1..267) consensus	86.6003	0.0140361	0.207553	1
LYa_b1_contig_20185 (353..701) consensus	86.6003	0.0140336	0.207553	1
LYa_b1_contig_35370 (131..539) consensus	86.6003	0.0140351	0.207553	1
LYa_b1_contig_44843 (78..448) consensus	86.5365	0.0119942	0.187545	1
LYa_b1_contig_49092 (272..602) consensus	86.2082	0.012269	0.190155	1
LYa_b1_contig_72933 (86..1248) consensus	86.0547	3.92954e-06	0.000775936	1
LYa_b1_contig_139280 (80..432) consensus	85.9931	0.00995079	0.168487	1
LYa_b1_contig_88553 (15..360) consensus	85.6382	0.0095407	0.164351	1
LYa_b1_contig_119654 (389..789) consensus	85.5507	0.0094351	0.163326	1
LYa_b1_contig_48114 (1..281) consensus	85.4763	0.00922495	0.161309	1
LYa_b1_contig_141370 (1..219) consensus	85.3476	0.00826618	0	1
LYa_b1_contig_170704 (1918..2264) consensus	84.9195	0.0140185	0	1
LYa_b1_contig_88582 (1..233) consensus	84.7509	0.0151417	0	1
LYa_b1_contig_350156 (415..707) consensus	84.7509	0.0151408	0	1
LYa_b1_contig_350926 (765..1129) consensus	84.7509	0.0151168	0	1
LYa_b1_contig_336928 (4194..4597) consensus	84.7509	0.0151203	0	1
LYa_b1_contig_349686 (151..687) consensus	84.7509	0.0151163	0	1
LYa_b1_contig_307 (2294..2885) consensus	84.7509	0.0151166	0	1
LYa_b1_contig_161513 (1147..1826) consensus	84.7509	0.0151134	0	1
LYa_b1_contig_63616 (1..232) consensus	84.6142	0.00834894	0	1
LYa_b1_contig_5907 (1174..1464) consensus	84.5384	0.00906324	0.1594	1
LYa_b1_contig_29251 (1..596) consensus	84.4231	0.00827354	0	1
LYa_b1_contig_2921 (974..1802) consensus	84.4093	0.0149705	0.2162	1
LYa_b1_contig_48936 (304..658) consensus	84.287	0.00983418	0	1
LYa_b1_contig_55540 (1..799) consensus	84.0435	0.0105011	0	1
LYa_b1_contig_83028 (203..699) consensus	83.9788	0.0121649	0	1
LYa_b1_contig_296396 (10..346) consensus	83.7591	0.0152901	0	1
LYa_b1_contig_301140 (307..702) consensus	83.7591	0.0152804	0	1
LYa_b1_contig_296033 (203..671) consensus	83.7591	0.0152852	0	1
LYa_b1_contig_934 (1..649) consensus	83.5939	1.32319e-05	0.00199409	1
LYa_b1_contig_40912 (4342..4655) consensus	83.2956	0.0106981	0	1
LYa_b1_contig_2943 (10..320) consensus	82.8479	0.00885846	0	1
LYa_b1_contig_45482 (272..633) consensus	82.7654	0.0104892	0	1
LYa_b1_contig_83030 (22..265) consensus	82.6813	0.0101586	0.170532	1
LYa_b1_contig_3591 (1..267) consensus	82.6256	8.45719e-08	3.94864e-05	0
LYa_b1_contig_28251 (283..710) consensus	82.6141	0.00970251	0.165765	1
LYa_b1_contig_9173 (1800..2148) consensus	82.4168	0.0100407	0.169407	1
LYa_b1_contig_20914 (52..619) consensus	82.4168	0.0100396	0.169407	1
LYa_b1_contig_123149 (237..698) consensus	82.4161	0.00878406	0	1
LYa_b1_contig_54135 (645..1062) consensus	82.2184	0.0154541	0.2208	1
LYa_b1_contig_184205 (86..501) consensus	82.1659	0.0124087	0	1
LYa_b1_contig_142405 (861..1214) consensus	82.1252	0.0148866	0	1
LYa_b1_contig_349782 (1009..1302) consensus	81.9567	0.0159923	0	1
LYa_b1_contig_65674 (3055..3476) consensus	81.9567	0.0159995	0	1
LYa_b1_contig_60089 (4..331) consensus	81.9551	0.00902047	0	1
LYa_b1_contig_166188 (1..416) consensus	81.76	0.0122295	0	1
LYa_b1_contig_26563 (2497..2791) consensus	81.3573	0.00926584	0	1
LYa_b1_contig_298215 (48..698) consensus	81.3263	0.0104284	0	1
LYa_b1_contig_115017 (51..658) consensus	81.2452	0.0105082	0	1
LYa_b1_contig_14758 (1..540) consensus	81.0435	0.000160987	0.0119415	1
LYa_b1_contig_297417 (43..291) consensus	80.7985	0.0165009	0	1
LYa_b1_contig_297915 (552..843) consensus	80.7985	0.0165004	0	1
LYa_b1_contig_199340 (1394..1705) consensus	80.7985	0.0165068	0	1
LYa_b1_contig_249120 (2145..2483) consensus	80.7985	0.0165069	0	1
LYa_b1_contig_301899 (40..689) consensus	80.7985	0.0165058	0	1
LYa_b1_contig_242340 (217..716) consensus	80.6384	0.0153983	0	1
LYa_b1_contig_67251 (5..444) consensus	80.6267	0.0149461	0.21599	1
LYa_b1_contig_28264 (616..902) consensus	80.5662	0.0102449	0	1
LYa_b1_contig_33305 (65..723) consensus	80.3555	0.00923227	0	1
LYa_b1_contig_51493 (3..305) consensus	80.2342	0.00962456	0	1
LYa_b1_contig_138030 (1..374) consensus	80.2176	0.00932215	0	1
LYa_b1_contig_26594 (861..1289) consensus	80.0274	0.0161456	0.227019	1
LYa_b1_contig_3558 (275..787) consensus	80.0274	0.0161478	0.227019	1
LYa_b1_contig_14521 (32..986) consensus	80.0274	0.0161478	0.227019	1
LYa_b1_contig_298838 (1..332) consensus	79.9951	0.0126524	0	1
LYa_b1_contig_4619 (30..1440) consensus	79.9635	1.87064e-21	4.67267e-17	0
LYa_b1_contig_28213 (246..1502) consensus	79.9486	0.00938211	0	1
LYa_b1_contig_29314 (4..240) consensus	79.8883	0.011963	0	1
LYa_b1_contig_98259 (168..386) consensus	79.8335	0.0122685	0	1
LYa_b1_contig_39431 (1..509) consensus	79.7373	5.46084e-06	0.00100371	1
LYa_b1_contig_209850 (1..343) consensus	79.6588	4.05242e-10	4.65404e-07	0
LYa_b1_contig_72685 (24..511) consensus	79.5493	0.0113472	0.181374	1
LYa_b1_contig_107645 (78..927) consensus	79.5098	0.0094119	0	1
LYa_b1_contig_206360 (1..475) consensus	79.3309	0.0156673	0	1
LYa_b1_contig_61834 (209..1063) consensus	79.2361	0.0121617	0.189157	1
LYa_b1_contig_352994 (114..356) consensus	79.1625	0.016841	0	1
LYa_b1_contig_350419 (176..424) consensus	79.1625	0.0168474	0	1
LYa_b1_contig_11565 (1..258) consensus	79.1625	0.016841	0	1
LYa_b1_contig_314374 (1..361) consensus	79.1625	0.0168372	0	1
LYa_b1_contig_70543 (2858..3284) consensus	79.1625	0.0168307	0	1
LYa_b1_contig_351011 (103..589) consensus	79.1625	0.0168285	0	1
LYa_b1_contig_307 (1596..2213) consensus	79.1625	0.016829	0	1
LYa_b1_contig_116521 (123..1323) consensus	79.1625	0.0168312	0	1
LYa_b1_contig_126646 (1..272) consensus	79.129	0.0118236	0	1
LYa_b1_contig_162183 (125..699) consensus	79.0482	0.0109994	0	1
LYa_b1_contig_89324 (1809..2338) consensus	78.9629	0.00977845	0	1
LYa_b1_contig_3955 (88..708) consensus	78.8068	0.0118731	0	1
LYa_b1_contig_2601 (2176..2480) consensus	78.6221	0.0111565	0	1
LYa_b1_contig_109396 (1..209) consensus	78.5918	0.00948416	0	1
LYa_b1_contig_5330 (1..2825) consensus	78.5861	1.00652e-09	1.00567e-06	0
LYa_b1_contig_222830 (1..555) consensus	78.5624	0.0110189	0	1
LYa_b1_contig_136494 (88..430) consensus	78.3697	0.0117539	0	1
LYa_b1_contig_73688 (3..295) consensus	78.1514	0.00994047	0	1
LYa_b1_contig_63434 (1..1104) consensus	78.0375	2.48856e-05	0.00310809	1
LYa_b1_contig_301770 (512..851) consensus	78.036	0.0114225	0	1
LYa_b1_contig_46105 (91..349) consensus	78.0262	0.0123909	0.19143	1
LYa_b1_contig_296730 (904..1142) consensus	77.8379	0.0173491	0	1
LYa_b1_contig_296189 (14..282) consensus	77.8379	0.0173478	0	1
LYa_b1_contig_297791 (1..270) consensus	77.8379	0.0173477	0	1
LYa_b1_contig_298337 (20..310) consensus	77.8379	0.017345	0	1
LYa_b1_contig_298090 (1..335) consensus	77.8379	0.0173446	0	1
LYa_b1_contig_296085 (65..463) consensus	77.8379	0.0173419	0	1
LYa_b1_contig_298611 (6..459) consensus	77.8379	0.0173435	0	1
LYa_b1_contig_55837 (52..400) consensus	77.8364	0.0167847	0.232408	1
LYa_b1_contig_99688 (82..446) consensus	77.8364	0.0167844	0.232408	1
LYa_b1_contig_18563 (2224..3084) consensus	77.8364	0.0167826	0.232408	1
LYa_b1_contig_72746 (535..1051) consensus	77.8361	0.0112972	0	1
LYa_b1_contig_65056 (161..582) consensus	77.6892	0.0126142	0	1
LYa_b1_contig_62230 (36..527) consensus	77.6103	0.0116836	0	1
LYa_b1_contig_91767 (643..979) consensus	77.4788	0.0103533	0	1
LYa_b1_contig_119224 (28..397) consensus	77.3946	0.0111726	0	1
LYa_b1_contig_99884 (122..520) consensus	77.3569	0.0145735	0	1
LYa_b1_contig_48576 (34..360) consensus	77.0941	0.01004	0	1
LYa_b1_contig_44677 (3..231) consensus	76.9302	0.0125583	0	1
LYa_b1_contig_106377 (84..380) consensus	76.7684	0.0113217	0	1
LYa_b1_contig_32224 (1..312) consensus	76.7684	0.0113194	0	1
LYa_b1_contig_349519 (11..508) consensus	76.7451	0.000238989	0.0157201	1
LYa_b1_contig_92069 (9..484) consensus	76.7045	0.0152647	0	1
LYa_b1_contig_122030 (365..913) consensus	76.6093	0.0125401	0	1
LYa_b1_contig_349767 (15..265) consensus	76.3683	0.0176413	0	1
LYa_b1_contig_350156 (1074..1365) consensus	76.3683	0.0176505	0	1
LYa_b1_contig_183095 (38..340) consensus	76.3683	0.0176386	0	1
LYa_b1_contig_350177 (216..564) consensus	76.3683	0.0176425	0	1
LYa_b1_contig_77824 (21..375) consensus	76.3683	0.0176425	0	1
LYa_b1_contig_351187 (145..522) consensus	76.3683	0.0176429	0	1
LYa_b1_contig_70854 (23..542) consensus	76.3683	0.0176462	0	1
LYa_b1_contig_349983 (390..1118) consensus	76.3683	0.0176462	0	1
LYa_b1_contig_66433 (1..358) consensus	76.2845	0.0107169	0	1
LYa_b1_contig_67892 (1..237) consensus	76.2763	0.0130214	0	1
LYa_b1_contig_91856 (1309..1749) consensus	76.1712	0.0124439	0	1
LYa_b1_contig_4467 (866..1220) consensus	76.0147	0.0124064	0	1
LYa_b1_contig_66675 (182..654) consensus	75.6454	0.0173712	0.237355	1
LYa_b1_contig_62423 (85..561) consensus	75.6454	0.0173702	0.237355	1
LYa_b1_contig_24696 (767..1300) consensus	75.6454	0.0173909	0.237373	1
LYa_b1_contig_98002 (6..526) consensus	75.6419	0.0118806	0	1
LYa_b1_contig_99938 (181..922) consensus	75.6419	0.0118822	0	1
LYa_b1_contig_52687 (445..676) consensus	75.4482	0.0127955	0	1
LYa_b1_contig_146257 (183..423) consensus	75.4122	0.0123951	0	1
LYa_b1_contig_48850 (1..594) consensus	75.3627	0.0104863	0	1
LYa_b1_contig_187715 (763..1572) consensus	75.1816	0.0162837	0	1
LYa_b1_contig_180965 (160..675) consensus	75.0057	0.0136765	0	1
LYa_b1_contig_298611 (819..1210) consensus	74.8773	0.019007	0	1
LYa_b1_contig_44935 (589..993) consensus	74.8057	0.0152038	0	1
LYa_b1_contig_25245 (1..442) consensus	74.7693	7.20974e-09	5.33606e-06	0
LYa_b1_contig_62737 (1054..1515) consensus	74.731	0.0133761	0	1
LYa_b1_contig_73050 (1..514) consensus	74.7174	0.017752	0	1
LYa_b1_contig_67808 (24..699) consensus	74.5817	0.013468	0	1
LYa_b1_contig_329017 (1..759) consensus	74.5587	0.000136403	0.0107145	1
LYa_b1_contig_12537 (128..622) consensus	74.5204	0.0109515	0	1
LYa_b1_contig_170704 (1500..1818) consensus	74.2447	0.0146179	0	1
LYa_b1_contig_45591 (106..402) consensus	74.1196	0.018217	0	1
LYa_b1_contig_170704 (5661..5904) consensus	73.9101	0.0161992	0	1
LYa_b1_contig_63258 (6..396) consensus	73.7861	0.0104298	0	1
LYa_b1_contig_305065 (1..218) consensus	73.751	0.0135261	0	1
LYa_b1_contig_80590 (38..268) consensus	73.7277	0.0125098	0	1
LYa_b1_contig_8550 (1..1348) consensus	73.7054	5.80485e-06	0.00104882	1
LYa_b1_contig_38274 (471..947) consensus	73.5741	0.0186246	0	1
LYa_b1_contig_344691 (189..786) consensus	73.5741	0.0186323	0	1
LYa_b1_contig_352124 (75..950) consensus	73.5741	0.0186335	0	1
LYa_b1_contig_57313 (10..755) consensus	73.4544	0.0183422	0.246088	1
LYa_b1_contig_300732 (8..266) consensus	73.4264	0.0129543	0	1
LYa_b1_contig_58517 (1273..1534) consensus	73.2894	0.0145694	0	1
LYa_b1_contig_15650 (82..345) consensus	73.2018	0.0163162	0	1
LYa_b1_contig_65894 (1..609) consensus	72.9739	9.5484e-07	0.000259249	0
LYa_b1_contig_122380 (794..1177) consensus	72.9368	0.012525	0	1
LYa_b1_contig_18504 (1..288) consensus	72.8788	0.0144072	0	1
LYa_b1_contig_67144 (28..256) consensus	72.8513	0.0126606	0	1
LYa_b1_contig_117407 (20..690) consensus	72.8049	0.0127405	0	1
LYa_b1_contig_296177 (1..584) consensus	72.788	3.80961e-05	0.00426625	1
LYa_b1_contig_55899 (1..299) consensus	72.787	0.0164385	0	1
LYa_b1_contig_4823 (1..882) consensus	72.6581	0.0140583	0	1
LYa_b1_contig_20547 (479..742) consensus	72.628	0.0131536	0	1
LYa_b1_contig_63536 (757..1282) consensus	72.3465	8.18335e-05	0.00739603	1
LYa_b1_contig_61075 (90..348) consensus	72.2795	0.0130292	0	1
LYa_b1_contig_41961 (998..1270) consensus	72.014	0.0121347	0	1
LYa_b1_contig_110649 (29..229) consensus	71.9167	0.0193854	0	1
LYa_b1_contig_296224 (3693..3920) consensus	71.9167	0.0193846	0	1
LYa_b1_contig_300609 (81..374) consensus	71.9167	0.0193977	0	1
LYa_b1_contig_205070 (79..388) consensus	71.9167	0.0194023	0	1
LYa_b1_contig_120280 (1..337) consensus	71.9167	0.0194033	0	1
LYa_b1_contig_55989 (1..386) consensus	71.9167	0.0194208	0	1
LYa_b1_contig_60839 (880..1293) consensus	71.9167	0.019422	0	1
LYa_b1_contig_299899 (146..560) consensus	71.9167	0.0194212	0	1
LYa_b1_contig_44025 (611..1030) consensus	71.9167	0.0194085	0	1
LYa_b1_contig_47409 (159..688) consensus	71.9167	0.019407	0	1
LYa_b1_contig_303645 (1..546) consensus	71.9167	0.0194119	0	1
LYa_b1_contig_297022 (122..671) consensus	71.9167	0.0194266	0	1
LYa_b1_contig_50695 (57..639) consensus	71.8618	0.0179253	0	1
LYa_b1_contig_80575 (103..878) consensus	71.8618	0.0179283	0	1
LYa_b1_contig_87313 (1483..1880) consensus	71.7828	0.0141273	0	1
LYa_b1_contig_15156 (55..549) consensus	71.7526	0.010871	0	1
LYa_b1_contig_10378 (1097..1748) consensus	71.6962	0.0131744	0	1
LYa_b1_contig_317867 (7..363) consensus	71.45	0.0153767	0	1
LYa_b1_contig_89835 (379..1194) consensus	71.4093	3.44777e-11	5.64734e-08	0
LYa_b1_contig_17323 (9..2005) consensus	71.3618	1.07621e-06	0.000288234	0
LYa_b1_contig_81739 (2418..2905) consensus	71.358	0.0125529	0	1
LYa_b1_contig_7957 (191..731) consensus	71.3056	2.16834e-05	0.00280274	1
LYa_b1_contig_28419 (142..370) consensus	71.2634	0.0193819	0	1
LYa_b1_contig_66939 (43..315) consensus	71.2634	0.0193681	0	1
LYa_b1_contig_9790 (54..423) consensus	71.2634	0.0193687	0	1
LYa_b1_contig_297861 (1046..1677) consensus	71.1142	0.0149184	0	1
LYa_b1_contig_96897 (148..457) consensus	70.8568	0.0130581	0	1
LYa_b1_contig_108904 (2824..3124) consensus	70.78	0.0198429	0	1
LYa_b1_contig_21073 (1306..1667) consensus	70.78	0.0198345	0	1
LYa_b1_contig_102018 (1126..1522) consensus	70.78	0.0198368	0	1
LYa_b1_contig_303004 (105..776) consensus	70.78	0.0198336	0	1
LYa_b1_contig_349818 (43..808) consensus	70.78	0.0198269	0	1
LYa_b1_contig_209585 (376..808) consensus	70.7752	0.014746	0	1
LYa_b1_contig_62400 (146..584) consensus	70.6406	0.0115204	0	1
LYa_b1_contig_47187 (254..636) consensus	70.1785	0.0132863	0	1
LYa_b1_contig_67149 (31..274) consensus	70.1686	0.0124629	0	1
LYa_b1_contig_16177 (1..2489) consensus	70.105	2.50858e-06	0.000555759	0
LYa_b1_contig_9670 (1..1529) consensus	70.0649	0.000252306	0.016288	1
LYa_b1_contig_16495 (614..1757) consensus	69.7438	0.000171644	0.0124546	1
LYa_b1_contig_74468 (1..614) consensus	69.6877	0.01365	0	1
LYa_b1_contig_17149 (23..296) consensus	69.6567	0.0120416	0	1
LYa_b1_contig_299544 (39..246) consensus	69.6483	0.013641	0	1
LYa_b1_contig_79241 (2..208) consensus	69.498	0.0140252	0	1
LYa_b1_contig_303277 (132..498) consensus	69.3187	0.0141988	0	1
LYa_b1_contig_160931 (1..334) consensus	69.2747	0.0134388	0	1
LYa_b1_contig_137386 (1..699) consensus	69.2515	0.013801	0	1
LYa_b1_contig_83672 (63..350) consensus	69.2419	0.0138037	0	1
LYa_b1_contig_64958 (569..1283) consensus	69.174	6.55165e-05	0.00631676	1
LYa_b1_contig_3365 (110..339) consensus	69.1643	0.0167346	0	1
LYa_b1_contig_25775 (1..265) consensus	69.0724	0.0204501	0	1
LYa_b1_contig_43323 (56..412) consensus	69.0724	0.0204496	0	1
LYa_b1_contig_16417 (39..445) consensus	69.0724	0.0204577	0	1
LYa_b1_contig_302419 (44..256) consensus	68.9562	0.0201945	0	1
LYa_b1_contig_297471 (1..215) consensus	68.9562	0.0201931	0	1
LYa_b1_contig_106485 (50..321) consensus	68.9562	0.0201901	0	1
LYa_b1_contig_83877 (48..322) consensus	68.9562	0.0201765	0	1
LYa_b1_contig_21613 (74..349) consensus	68.9562	0.0201753	0	1
LYa_b1_contig_299117 (533..851) consensus	68.9562	0.02017	0	1
LYa_b1_contig_307467 (126..608) consensus	68.9562	0.0201655	0	1
LYa_b1_contig_300838 (486..1154) consensus	68.9562	0.0201646	0	1
LYa_b1_contig_150042 (1..552) consensus	68.8874	0.0168831	0	1
LYa_b1_contig_58722 (1..867) consensus	68.8705	0.000277965	0.0175004	1
LYa_b1_contig_38332 (1..1871) consensus	68.603	4.21009e-08	2.26159e-05	0
LYa_b1_contig_18663 (831..1095) consensus	68.3212	0.0186809	0	1
LYa_b1_contig_248511 (88..297) consensus	68.1992	0.0192508	0	1
LYa_b1_contig_281898 (2002..2234) consensus	68.1992	0.0192483	0	1
LYa_b1_contig_297960 (1..266) consensus	68.1539	0.0154835	0	1
LYa_b1_contig_352567 (212..421) consensus	67.9858	0.0217355	0	1
LYa_b1_contig_336928 (602..863) consensus	67.9858	0.0217371	0	1
LYa_b1_contig_216466 (306..600) consensus	67.9858	0.0217375	0	1
LYa_b1_contig_296588 (1..413) consensus	67.9858	0.0217366	0	1
LYa_b1_contig_140295 (290..703) consensus	67.9858	0.0217258	0	1
LYa_b1_contig_307 (3028..3455) consensus	67.9858	0.0217295	0	1
LYa_b1_contig_255186 (697..1274) consensus	67.9858	0.0217267	0	1
LYa_b1_contig_191653 (423..1024) consensus	67.9858	0.021727	0	1
LYa_b1_contig_194764 (1..1049) consensus	67.9858	0.021728	0	1
LYa_b1_contig_3418 (38..1275) consensus	67.8523	2.4321e-13	8.3795e-10	0
LYa_b1_contig_20736 (841..2907) consensus	67.7434	2.312e-05	0.002939	1
LYa_b1_contig_41737 (17..1250) consensus	67.7322	7.75125e-08	3.65318e-05	0
LYa_b1_contig_13546 (23..357) consensus	67.7223	4.23969e-05	0.00460382	1
LYa_b1_contig_69862 (77..804) consensus	67.7124	4.40619e-11	6.87889e-08	0
LYa_b1_contig_2373 (145..438) consensus	67.683	0.0122904	0	1
LYa_b1_contig_93459 (364..753) consensus	67.6424	0.0193961	0	1
LYa_b1_contig_36554 (21..319) consensus	67.3887	0.0153607	0	1
LYa_b1_contig_1175 (196..459) consensus	67.2227	0.0143045	0	1
LYa_b1_contig_94620 (70..916) consensus	66.9722	0.000356165	0.0209333	1
LYa_b1_contig_131591 (565..1199) consensus	66.9243	0.0123835	0	1
LYa_b1_contig_30085 (1..241) consensus	66.8814	0.0212892	0	1
LYa_b1_contig_101815 (116..563) consensus	66.8814	0.0213	0	1
LYa_b1_contig_26358 (316..1713) consensus	66.7042	0.000130258	0.0103836	1
LYa_b1_contig_145710 (1..337) consensus	66.523	0.0146869	0	1
LYa_b1_contig_141686 (99..572) consensus	66.4642	0.0145603	0	1
LYa_b1_contig_5419 (2811..3304) consensus	66.2992	0.016381	0	1
LYa_b1_contig_19971 (1..205) consensus	66.2115	0.0185328	0	1
LYa_b1_contig_264112 (69..289) consensus	65.9956	0.0218167	0	1
LYa_b1_contig_297327 (54..287) consensus	65.9956	0.0218123	0	1
LYa_b1_contig_125625 (1..248) consensus	65.9956	0.0218104	0	1
LYa_b1_contig_297481 (136..385) consensus	65.9956	0.0218103	0	1
LYa_b1_contig_249120 (2828..3082) consensus	65.9956	0.0218085	0	1
LYa_b1_contig_38600 (740..1110) consensus	65.9956	0.0218045	0	1
LYa_b1_contig_31614 (483..698) consensus	65.8383	0.012712	0	1
LYa_b1_contig_37841 (423..841) consensus	65.8269	0.013649	0	1
LYa_b1_contig_22632 (139..762) consensus	65.6724	0.015026	0	1
LYa_b1_contig_19176 (1..865) consensus	65.4459	2.42719e-06	0.000542539	0
LYa_b1_contig_12439 (1..478) consensus	65.4067	0.0128205	0	1
LYa_b1_contig_31563 (15..595) consensus	65.351	2.34725e-06	0.000529407	0
LYa_b1_contig_216466 (2136..2347) consensus	65.1916	0.0222766	0	1
LYa_b1_contig_350005 (842..1057) consensus	65.1916	0.0222736	0	1
LYa_b1_contig_349566 (7..252) consensus	65.1916	0.0222586	0	1
LYa_b1_contig_337737 (1..264) consensus	65.1916	0.0222629	0	1
LYa_b1_contig_349782 (450..747) consensus	65.1916	0.0222635	0	1
LYa_b1_contig_354616 (117..517) consensus	65.1916	0.022264	0	1
LYa_b1_contig_60843 (15..549) consensus	65.1916	0.0222776	0	1
LYa_b1_contig_221078 (23..572) consensus	65.1916	0.0222665	0	1
LYa_b1_contig_47891 (388..726) consensus	64.9741	0.0131653	0	1
LYa_b1_contig_185837 (1..342) consensus	64.8506	0.0154648	0	1
LYa_b1_contig_95177 (1..374) consensus	64.8476	0.0156412	0	1
LYa_b1_contig_52565 (1..243) consensus	64.741	0.0139404	0	1
LYa_b1_contig_146883 (218..613) consensus	64.7256	0.0132646	0	1
LYa_b1_contig_58457 (334..597) consensus	64.7082	0.0151389	0	1
LYa_b1_contig_20013 (61..264) consensus	64.6903	0.0221475	0	1
LYa_b1_contig_98947 (324..704) consensus	64.6903	0.0221283	0	1
LYa_b1_contig_16495 (119..523) consensus	64.6903	0.0221256	0	1
LYa_b1_contig_18364 (19..864) consensus	64.6903	0.0221187	0	1
LYa_b1_contig_297861 (383..862) consensus	64.5457	0.0149806	0	1
LYa_b1_contig_64797 (1..320) consensus	64.4118	0.0145611	0	1
LYa_b1_contig_57686 (174..407) consensus	64.2538	0.0156519	0	1
LYa_b1_contig_7652 (631..980) consensus	64.2538	0.0156509	0	1
LYa_b1_contig_262400 (1615..2002) consensus	64.2194	0.0149465	0	1
LYa_b1_contig_176950 (17..751) consensus	63.6971	0.0139888	0	1
LYa_b1_contig_297031 (8..459) consensus	63.665	0.000498252	0.0260782	1
LYa_b1_contig_141238 (23..357) consensus	63.6598	0.01569	0	1
LYa_b1_contig_71746 (35..378) consensus	63.5851	0.0160277	0	1
LYa_b1_contig_3365 (1322..1852) consensus	63.5092	0.0156405	0	1
LYa_b1_contig_350336 (108..786) consensus	63.26	1.98708e-05	0.00265075	1
LYa_b1_contig_297705 (40..251) consensus	63.2315	0.0171453	0	1
LYa_b1_contig_111826 (177..570) consensus	63.0658	0.0157743	0	1
LYa_b1_contig_296113 (878..1152) consensus	63.035	0.024454	0	1
LYa_b1_contig_301113 (73..520) consensus	63.035	0.0244693	0	1
LYa_b1_contig_98242 (47..638) consensus	62.9424	0.0156189	0	1
LYa_b1_contig_316786 (1..218) consensus	62.8991	0.0189158	0	1
LYa_b1_contig_182633 (1..242) consensus	62.8755	0.0225623	0	1
LYa_b1_contig_40654 (31..310) consensus	62.8755	0.0225497	0	1
LYa_b1_contig_297341 (12..490) consensus	62.8755	0.0225454	0	1
LYa_b1_contig_66034 (81..1844) consensus	62.7844	3.12835e-08	1.77598e-05	0
LYa_b1_contig_33395 (51..258) consensus	62.6939	0.0183803	0	1
LYa_b1_contig_220649 (43..390) consensus	62.6301	0.0141784	0	1
LYa_b1_contig_1650 (26..229) consensus	62.4993	0.0233701	0	1
LYa_b1_contig_2814 (1743..1983) consensus	62.4993	0.0233745	0	1
LYa_b1_contig_179023 (39..283) consensus	62.4993	0.023376	0	1
LYa_b1_contig_24696 (1446..1713) consensus	62.4993	0.0233793	0	1
LYa_b1_contig_119135 (1..400) consensus	62.4993	0.023381	0	1
LYa_b1_contig_53833 (1..426) consensus	62.4993	0.0233812	0	1
LYa_b1_contig_311339 (1..248) consensus	62.3974	0.0232539	0	1
LYa_b1_contig_70543 (2394..2671) consensus	62.3974	0.0232598	0	1
LYa_b1_contig_302339 (9..296) consensus	62.3974	0.0232448	0	1
LYa_b1_contig_102015 (454..746) consensus	62.3974	0.0232557	0	1
LYa_b1_contig_455304 (159..595) consensus	62.3974	0.0232575	0	1
LYa_b1_contig_349417 (6..500) consensus	62.3974	0.0232522	0	1
LYa_b1_contig_350853 (190..782) consensus	62.3974	0.0232536	0	1
LYa_b1_contig_10202 (1302..1670) consensus	62.3176	2.75173e-06	0.000597699	1
LYa_b1_contig_204985 (900..1305) consensus	62.2731	0.0145439	0	1
LYa_b1_contig_2050 (1..2296) consensus	62.2618	4.593e-07	0.000152463	0
LYa_b1_contig_99331 (15..256) consensus	62.2335	0.0180468	0	1
LYa_b1_contig_60566 (1618..1959) consensus	62.2298	0.01869	0	1
LYa_b1_contig_185851 (1279..1598) consensus	62.2107	0.0156725	0	1
LYa_b1_contig_56573 (1027..1890) consensus	62.1434	0.0165211	0	1
LYa_b1_contig_292684 (150..379) consensus	62.1193	0.0214033	0	1
LYa_b1_contig_183755 (1..246) consensus	62.036	0.0141881	0	1
LYa_b1_contig_55156 (730..1062) consensus	62.036	0.0141876	0	1
LYa_b1_contig_48800 (9..332) consensus	61.9929	0.0165209	0	1
LYa_b1_contig_306477 (18..513) consensus	61.9487	0.000455128	0.0247221	1
LYa_b1_contig_63400 (9..235) consensus	61.8413	0.0146871	0	1
LYa_b1_contig_73064 (54..816) consensus	61.7686	0.0140739	0	1
LYa_b1_contig_7826 (11..417) consensus	61.6173	0.0154372	0	1
LYa_b1_contig_68435 (1..545) consensus	61.542	0.0154711	0	1
LYa_b1_contig_63796 (29..425) consensus	61.3864	0.0165907	0	1
LYa_b1_contig_68826 (6..1460) consensus	61.3232	0.000552933	0.0279307	1
LYa_b1_contig_98881 (246..912) consensus	61.2828	0.0166383	0	1
LYa_b1_contig_99361 (93..335) consensus	61.0444	0.0180406	0	1
LYa_b1_contig_110721 (59..310) consensus	60.7	0.0176477	0	1
LYa_b1_contig_154353 (6..465) consensus	60.4515	0.0178138	0	1
LYa_b1_contig_41419 (1..212) consensus	60.3082	0.0245191	0	1
LYa_b1_contig_102742 (33..488) consensus	60.2658	0.0155201	0	1
LYa_b1_contig_102742 (2196..2647) consensus	60.2528	0.0146604	0	1
LYa_b1_contig_206540 (1..297) consensus	60.2342	0.0160319	0	1
LYa_b1_contig_297639 (80..886) consensus	60.1626	2.91978e-06	0.000628735	1
LYa_b1_contig_68456 (6..354) consensus	60.1252	0.0170946	0	1
LYa_b1_contig_303253 (274..474) consensus	60.0745	0.0258637	0	1
LYa_b1_contig_234225 (1..209) consensus	60.0745	0.0258624	0	1
LYa_b1_contig_303039 (40..317) consensus	60.0745	0.0258915	0	1
LYa_b1_contig_53291 (1286..1616) consensus	60.0745	0.0258866	0	1
LYa_b1_contig_296312 (1..345) consensus	60.0745	0.025887	0	1
LYa_b1_contig_300841 (56..410) consensus	60.0745	0.0258883	0	1
LYa_b1_contig_306030 (23..790) consensus	60.0745	0.0258933	0	1
LYa_b1_contig_299241 (118..1394) consensus	60.0745	0.0258896	0	1
LYa_b1_contig_227570 (1..874) consensus	60.0737	8.57151e-06	0.00141334	1
LYa_b1_contig_159497 (1..316) consensus	60.0109	0.0204755	0	1
LYa_b1_contig_170704 (2276..3015) consensus	60.0101	0.000149323	0.01132	1
LYa_b1_contig_193246 (113..363) consensus	60.0003	0.0149226	0	1
LYa_b1_contig_296059 (168..417) consensus	59.915	0.0239405	0	1
LYa_b1_contig_4485 (40..413) consensus	59.8585	0.0177184	0	1
LYa_b1_contig_111741 (1..234) consensus	59.732	0.0150068	0	1
LYa_b1_contig_184440 (519..796) consensus	59.6032	0.025468	0	1
LYa_b1_contig_350243 (242..578) consensus	59.6032	0.0254642	0	1
LYa_b1_contig_351187 (605..968) consensus	59.6032	0.0254468	0	1
LYa_b1_contig_349660 (295..686) consensus	59.6032	0.0254348	0	1
LYa_b1_contig_310701 (1..525) consensus	59.6032	0.0254381	0	1
LYa_b1_contig_196708 (217..774) consensus	59.595	0.0211754	0	1
LYa_b1_contig_26833 (50..843) consensus	59.5436	9.47781e-07	0.000258504	0
LYa_b1_contig_42131 (48..317) consensus	59.5299	0.017407	0	1
LYa_b1_contig_26844 (43..510) consensus	59.3189	0.0245741	0	1
LYa_b1_contig_105495 (942..1178) consensus	59.2549	0.0198376	0	1
LYa_b1_contig_182294 (78..364) consensus	59.2549	0.0198314	0	1
LYa_b1_contig_157276 (1..338) consensus	59.2426	0.0151822	0	1
LYa_b1_contig_112735 (1..1408) consensus	59.0388	3.9631e-06	0.000779482	1
LYa_b1_contig_299261 (122..403) consensus	58.9688	0.000587416	0.0289695	1
LYa_b1_contig_81102 (1..341) consensus	58.883	0.0160026	0	1
LYa_b1_contig_163031 (1431..1706) consensus	58.4989	0.0195226	0	1
LYa_b1_contig_36808 (230..491) consensus	58.4202	0.0231662	0	1
LYa_b1_contig_102742 (2685..3429) consensus	58.4167	4.06765e-05	0.00447739	1
LYa_b1_contig_28685 (1..533) consensus	58.3987	6.2254e-05	0.0060982	1
LYa_b1_contig_89942 (122..492) consensus	58.3083	0.0203218	0	1
LYa_b1_contig_91649 (433..856) consensus	58.3083	0.020321	0	1
LYa_b1_contig_296513 (590..1266) consensus	58.299	0.0180676	0	1
LYa_b1_contig_50809 (225..459) consensus	58.2886	0.0161797	0	1
LYa_b1_contig_660 (128..797) consensus	58.2738	2.39505e-08	1.3913e-05	0
LYa_b1_contig_31061 (181..410) consensus	58.1171	0.0259964	0	1
LYa_b1_contig_20185 (1379..1621) consensus	58.1171	0.0259947	0	1
LYa_b1_contig_18096 (1933..2246) consensus	58.1171	0.0259927	0	1
LYa_b1_contig_11236 (1..332) consensus	58.1171	0.0259955	0	1
LYa_b1_contig_44868 (423..772) consensus	58.1171	0.0260015	0	1
LYa_b1_contig_38198 (2..324) consensus	58.039	0.0209905	0	1
LYa_b1_contig_133369 (1..555) consensus	57.9743	0.000858214	0.0375435	1
LYa_b1_contig_65158 (1..1294) consensus	57.9283	2.6143e-08	1.49263e-05	0
LYa_b1_contig_62232 (16..436) consensus	57.863	3.6837e-05	0.00416359	1
LYa_b1_contig_32686 (2..352) consensus	57.808	0.0228088	0	1
LYa_b1_contig_44528 (4..210) consensus	57.2751	0.017482	0	1
LYa_b1_contig_127542 (1..209) consensus	57.2369	0.0217314	0	1
LYa_b1_contig_64432 (6..393) consensus	57.2207	0.0171684	0	1
LYa_b1_contig_93167 (1..227) consensus	57.1335	0.0161684	0	1
LYa_b1_contig_296486 (34..246) consensus	57.1139	0.0280668	0	1
LYa_b1_contig_276248 (2..226) consensus	57.1139	0.0280649	0	1
LYa_b1_contig_277462 (681..910) consensus	57.1139	0.0280636	0	1
LYa_b1_contig_302548 (265..817) consensus	57.1139	0.0280678	0	1
LYa_b1_contig_21022 (4..628) consensus	57.1139	0.0280628	0	1
LYa_b1_contig_85302 (83..670) consensus	57.0525	0.0220673	0	1
LYa_b1_contig_32544 (41..740) consensus	57.0355	0.000422482	0.0235037	1
LYa_b1_contig_195385 (16..536) consensus	56.9546	0.0258917	0	1
LYa_b1_contig_113442 (206..799) consensus	56.9489	0.0176843	0	1
LYa_b1_contig_49973 (36..565) consensus	56.892	0.0185485	0	1
LYa_b1_contig_101395 (1116..1353) consensus	56.809	0.0282149	0	1
LYa_b1_contig_350156 (762..1000) consensus	56.809	0.0282062	0	1
LYa_b1_contig_350218 (177..429) consensus	56.809	0.0282052	0	1
LYa_b1_contig_36573 (1721..1996) consensus	56.809	0.0281996	0	1
LYa_b1_contig_349468 (91..410) consensus	56.809	0.0281962	0	1
LYa_b1_contig_352333 (1..322) consensus	56.809	0.0281941	0	1
LYa_b1_contig_350580 (27..372) consensus	56.809	0.0281905	0	1
LYa_b1_contig_250037 (165..511) consensus	56.809	0.0281968	0	1
LYa_b1_contig_352479 (1..483) consensus	56.809	0.0282128	0	1
LYa_b1_contig_328609 (924..1438) consensus	56.809	0.0282235	0	1
LYa_b1_contig_50564 (1..245) consensus	56.7949	0.0242484	0	1
LYa_b1_contig_156186 (20..299) consensus	56.7565	0.0176848	0	1
LYa_b1_contig_153521 (5..468) consensus	56.6451	0.0212027	0	1
LYa_b1_contig_296357 (21..374) consensus	56.2999	0.000938188	0.0397773	1
LYa_b1_contig_137283 (237..498) consensus	56.2971	0.0215749	0	1
LYa_b1_contig_8629 (69..811) consensus	56.2431	1.06783e-07	4.67954e-05	0
LYa_b1_contig_130810 (210..446) consensus	56.1996	0.0247332	0	1
LYa_b1_contig_27535 (35..307) consensus	56.161	0.0187864	0	1
LYa_b1_contig_125814 (766..1069) consensus	56.152	0.0204186	0	1
LYa_b1_contig_21537 (1..620) consensus	56.1153	0.0215949	0	1
LYa_b1_contig_138671 (16..352) consensus	55.9456	0.0168764	0	1
LYa_b1_contig_32544 (794..1028) consensus	55.926	0.0276318	0	1
LYa_b1_contig_57491 (259..526) consensus	55.926	0.0276304	0	1
LYa_b1_contig_26471 (1303..1572) consensus	55.926	0.0276363	0	1
LYa_b1_contig_20828 (367..720) consensus	55.926	0.0276193	0	1
LYa_b1_contig_61020 (270..959) consensus	55.926	0.0276145	0	1
LYa_b1_contig_41677 (568..1277) consensus	55.926	0.0276055	0	1
LYa_b1_contig_39230 (1496..1821) consensus	55.882	0.0188031	0	1
LYa_b1_contig_11860 (31..530) consensus	55.882	0.0188032	0	1
LYa_b1_contig_114625 (2..554) consensus	55.8795	0.0220694	0	1
LYa_b1_contig_53834 (1..385) consensus	55.8556	0.0167443	0	1
LYa_b1_contig_297549 (381..815) consensus	55.828	0.0197639	0	1
LYa_b1_contig_18411 (1..429) consensus	55.593	9.38794e-08	4.28313e-05	0
LYa_b1_contig_305758 (151..471) consensus	55.5024	0.0197915	0	1
LYa_b1_contig_75045 (71..505) consensus	55.468	9.47327e-05	0.00819947	1
LYa_b1_contig_60566 (583..888) consensus	55.4612	0.0204804	0	1
LYa_b1_contig_122239 (13..457) consensus	55.4445	0.0237922	0	1
LYa_b1_contig_114160 (20..317) consensus	55.4244	0.0170479	0	1
LYa_b1_contig_256982 (1..663) consensus	55.4116	2.74969e-11	4.57896e-08	0
LYa_b1_contig_144319 (215..475) consensus	55.4045	0.0192855	0	1
LYa_b1_contig_140439 (192..636) consensus	55.0346	0.0192149	0	1
LYa_b1_contig_123776 (4..375) consensus	54.8691	0.0202727	0	1
LYa_b1_contig_163030 (75..459) consensus	54.8691	0.0202632	0	1
LYa_b1_contig_49826 (731..1001) consensus	54.8492	0.0246907	0	1
LYa_b1_contig_159457 (262..490) consensus	54.8457	0.0218018	0	1
LYa_b1_contig_305801 (7..397) consensus	54.8457	0.021803	0	1
LYa_b1_contig_32474 (1..375) consensus	54.8374	9.3912e-05	0.00814523	1
LYa_b1_contig_173978 (56..437) consensus	54.7863	0.0210098	0	1
LYa_b1_contig_15613 (116..427) consensus	54.7192	0.0199143	0	1
LYa_b1_contig_43131 (1..295) consensus	54.4927	0.0264207	0	1
LYa_b1_contig_20488 (41..553) consensus	54.4884	3.33404e-05	0.00386007	1
LYa_b1_contig_15784 (13..291) consensus	54.3302	0.0264013	0	1
LYa_b1_contig_67831 (1195..1627) consensus	54.2769	0.0201985	0	1
LYa_b1_contig_2605 (1..529) consensus	54.2219	8.47256e-05	0.00758552	1
LYa_b1_contig_300371 (670..881) consensus	54.1534	0.0300688	0	1
LYa_b1_contig_264112 (490..709) consensus	54.1534	0.0300842	0	1
LYa_b1_contig_296159 (1148..1422) consensus	54.1534	0.0300828	0	1
LYa_b1_contig_63466 (71..369) consensus	54.1534	0.0300919	0	1
LYa_b1_contig_103139 (900..1211) consensus	54.1534	0.0300867	0	1
LYa_b1_contig_14562 (993..1310) consensus	54.1534	0.0300873	0	1
LYa_b1_contig_155617 (6..325) consensus	54.1534	0.0300837	0	1
LYa_b1_contig_170917 (770..1102) consensus	54.1534	0.0300694	0	1
LYa_b1_contig_103139 (403..753) consensus	54.1534	0.0300655	0	1
LYa_b1_contig_34356 (628..999) consensus	54.1534	0.0300652	0	1
LYa_b1_contig_102277 (53..444) consensus	54.1534	0.0300645	0	1
LYa_b1_contig_96059 (909..1585) consensus	54.1534	0.0301028	0	1
LYa_b1_contig_85303 (550..806) consensus	54.0943	0.0240144	0	1
LYa_b1_contig_327560 (19..243) consensus	54.0149	0.0305426	0	1
LYa_b1_contig_350264 (447..678) consensus	54.0149	0.0305428	0	1
LYa_b1_contig_351188 (134..385) consensus	54.0149	0.0305437	0	1
LYa_b1_contig_145334 (473..732) consensus	54.0149	0.030542	0	1
LYa_b1_contig_336928 (2311..2579) consensus	54.0149	0.0305347	0	1
LYa_b1_contig_304902 (1..316) consensus	54.0149	0.0305325	0	1
LYa_b1_contig_21676 (1..333) consensus	54.0149	0.0305314	0	1
LYa_b1_contig_255186 (206..552) consensus	54.0149	0.0305291	0	1
LYa_b1_contig_352151 (177..544) consensus	54.0149	0.0305303	0	1
LYa_b1_contig_268190 (1079..1544) consensus	54.0149	0.0305319	0	1
LYa_b1_contig_298935 (25..797) consensus	54.0149	0.0305306	0	1
LYa_b1_contig_22539 (1153..1523) consensus	53.9633	0.0203241	0	1
LYa_b1_contig_19064 (8..239) consensus	53.9346	0.0224747	0	1
LYa_b1_contig_297396 (1..1086) consensus	53.8918	0.000740447	0.0340776	1
LYa_b1_contig_5419 (3633..3974) consensus	53.8153	0.0233842	0	1
LYa_b1_contig_15147 (662..879) consensus	53.7348	0.0290293	0	1
LYa_b1_contig_68991 (24..312) consensus	53.7348	0.0290338	0	1
LYa_b1_contig_46945 (34..411) consensus	53.7348	0.0290527	0	1
LYa_b1_contig_26358 (1725..2151) consensus	53.7348	0.0290372	0	1
LYa_b1_contig_88330 (957..1447) consensus	53.7348	0.0290402	0	1
LYa_b1_contig_552 (484..812) consensus	53.723	0.0191762	0	1
LYa_b1_contig_198437 (1..386) consensus	53.7087	4.59655e-05	0.00489626	1
LYa_b1_contig_2601 (2482..2849) consensus	53.6846	0.0202566	0	1
LYa_b1_contig_6645 (1559..2212) consensus	53.5915	0.000107475	0.00899374	1
LYa_b1_contig_119917 (55..616) consensus	53.5488	0.0189092	0	1
LYa_b1_contig_60055 (1210..1473) consensus	53.3991	0.0288369	0	1
LYa_b1_contig_289752 (18..340) consensus	53.3534	0.0229798	0	1
LYa_b1_contig_69845 (1..592) consensus	53.3292	0.0187195	0	1
LYa_b1_contig_102627 (221..612) consensus	53.3278	0.0238593	0	1
LYa_b1_contig_130863 (35..302) consensus	53.2569	0.0194653	0	1
LYa_b1_contig_82422 (38..310) consensus	53.2398	0.0267071	0	1
LYa_b1_contig_142947 (1..272) consensus	53.2337	0.0196472	0	1
LYa_b1_contig_301656 (144..465) consensus	53.1921	0.022386	0	1
LYa_b1_contig_152308 (9..774) consensus	53.1797	0.0221157	0	1
LYa_b1_contig_23724 (435..1473) consensus	53.1512	1.64741e-05	0.00230214	1
LYa_b1_contig_162555 (64..400) consensus	53.0628	0.0183968	0	1
LYa_b1_contig_180402 (393..636) consensus	53.0303	0.0219594	0	1
LYa_b1_contig_246898 (139..471) consensus	53.0303	0.0219608	0	1
LYa_b1_contig_48487 (263..800) consensus	52.8336	0.0276857	0	1
LYa_b1_contig_107799 (29..567) consensus	52.67	0.0227207	0	1
LYa_b1_contig_180169 (1..216) consensus	52.6448	0.0277477	0	1
LYa_b1_contig_38246 (17..256) consensus	52.6448	0.0277502	0	1
LYa_b1_contig_298215 (777..1218) consensus	52.5424	0.0217797	0	1
LYa_b1_contig_111582 (551..843) consensus	52.5204	0.0215368	0	1
LYa_b1_contig_68414 (344..709) consensus	52.4997	0.020768	0	1
LYa_b1_contig_25183 (49..324) consensus	52.3605	6.16081e-05	0.00607664	1
LYa_b1_contig_185806 (106..496) consensus	52.2751	0.0213602	0	1
LYa_b1_contig_318657 (1..331) consensus	52.2148	0.0227181	0	1
LYa_b1_contig_58743 (34..669) consensus	52.1385	0.0277481	0	1
LYa_b1_contig_107799 (920..1464) consensus	52.0784	0.022594	0	1
LYa_b1_contig_53067 (2089..2388) consensus	51.8852	0.0197954	0	1
LYa_b1_contig_305167 (43..981) consensus	51.8442	1.95786e-05	0.00262227	1
LYa_b1_contig_3365 (1933..2216) consensus	51.6219	0.0242496	0	1
LYa_b1_contig_303630 (4..295) consensus	51.554	0.027535	0	1
LYa_b1_contig_88330 (1..254) consensus	51.5437	0.0305349	0	1
LYa_b1_contig_13037 (3275..3591) consensus	51.5437	0.0305441	0	1
LYa_b1_contig_81008 (1..328) consensus	51.5437	0.030545	0	1
LYa_b1_contig_3446 (370..703) consensus	51.5437	0.030547	0	1
LYa_b1_contig_112766 (493..967) consensus	51.5437	0.0305486	0	1
LYa_b1_contig_25015 (17..674) consensus	51.5021	7.94655e-05	0.00721807	1
LYa_b1_contig_24451 (660..1292) consensus	51.4608	0.00107711	0.0434745	1
LYa_b1_contig_130139 (35..403) consensus	51.3575	0.0210375	0	1
LYa_b1_contig_46733 (1..475) consensus	51.2972	0.000176475	0.0127128	1
LYa_b1_contig_80973 (176..588) consensus	51.2501	0.0219553	0	1
LYa_b1_contig_349964 (677..885) consensus	51.2207	0.032794	0	1
LYa_b1_contig_351916 (52..285) consensus	51.2207	0.0327882	0	1
LYa_b1_contig_107180 (51..288) consensus	51.2207	0.0327832	0	1
LYa_b1_contig_268190 (763..1000) consensus	51.2207	0.0327739	0	1
LYa_b1_contig_38274 (43..382) consensus	51.2207	0.0327594	0	1
LYa_b1_contig_350497 (559..908) consensus	51.2207	0.0327645	0	1
LYa_b1_contig_64539 (1585..1943) consensus	51.2207	0.0327511	0	1
LYa_b1_contig_140736 (193..641) consensus	51.2207	0.0327462	0	1
LYa_b1_contig_30050 (45..654) consensus	51.2207	0.0327661	0	1
LYa_b1_contig_303874 (334..534) consensus	51.1929	0.0317748	0	1
LYa_b1_contig_296159 (50..251) consensus	51.1929	0.0317728	0	1
LYa_b1_contig_297611 (27..232) consensus	51.1929	0.0317503	0	1
LYa_b1_contig_151439 (183..389) consensus	51.1929	0.0317347	0	1
LYa_b1_contig_281898 (867..1093) consensus	51.1929	0.0317131	0	1
LYa_b1_contig_296033 (675..921) consensus	51.1929	0.0317005	0	1
LYa_b1_contig_286204 (922..1187) consensus	51.1929	0.0317254	0	1
LYa_b1_contig_297898 (265..543) consensus	51.1929	0.0317227	0	1
LYa_b1_contig_297090 (184..527) consensus	51.1929	0.0317266	0	1
LYa_b1_contig_102780 (2174..2567) consensus	51.1929	0.0317297	0	1
LYa_b1_contig_5135 (254..648) consensus	51.1929	0.0317238	0	1
LYa_b1_contig_281089 (140..549) consensus	51.1929	0.0317135	0	1
LYa_b1_contig_306144 (104..537) consensus	51.1929	0.0317072	0	1
LYa_b1_contig_85303 (808..1280) consensus	51.1929	0.0317196	0	1
LYa_b1_contig_54183 (1005..1580) consensus	51.1929	0.0317145	0	1
LYa_b1_contig_62875 (13..677) consensus	51.1929	0.0317078	0	1
LYa_b1_contig_296847 (3455..4232) consensus	51.1929	0.0317174	0	1
LYa_b1_contig_156159 (138..376) consensus	51.0754	0.0231982	0	1
LYa_b1_contig_197258 (74..277) consensus	51.0612	0.0253794	0	1
LYa_b1_contig_46317 (1..544) consensus	51.0612	0.0253763	0	1
LYa_b1_contig_160428 (4..348) consensus	51.0594	0.021477	0	1
LYa_b1_contig_9461 (1..453) consensus	50.9991	1.52915e-07	6.28752e-05	0
LYa_b1_contig_60851 (1..312) consensus	50.8654	0.0260565	0	1
LYa_b1_contig_41628 (59..822) consensus	50.8593	7.95014e-07	0.000224969	0
LYa_b1_contig_131994 (1..282) consensus	50.6306	0.0309882	0	1
LYa_b1_contig_188030 (1248..1531) consensus	50.5543	0.0251711	0	1
LYa_b1_contig_169103 (82..701) consensus	50.3935	0.0242318	0	1
LYa_b1_contig_281699 (5..330) consensus	50.0705	0.0233049	0	1
LYa_b1_contig_172293 (21..425) consensus	50.0226	0.0239163	0	1
LYa_b1_contig_301678 (1..236) consensus	49.9083	0.0231957	0	1
LYa_b1_contig_180652 (74..396) consensus	49.7456	0.0234178	0	1
LYa_b1_contig_14653 (242..547) consensus	49.6283	0.0253835	0	1
LYa_b1_contig_44935 (1..340) consensus	49.6283	0.0253854	0	1
LYa_b1_contig_194068 (1..315) consensus	49.5793	0.0212695	0	1
LYa_b1_contig_135207 (34..309) consensus	49.5663	0.0237418	0	1
LYa_b1_contig_133470 (1145..1584) consensus	49.5663	0.0237422	0	1
LYa_b1_contig_19557 (1481..1725) consensus	49.4503	0.0285778	0	1
LYa_b1_contig_45287 (214..462) consensus	49.3525	0.0313348	0	1
LYa_b1_contig_62292 (1..421) consensus	49.3525	0.0313217	0	1
LYa_b1_contig_17089 (106..593) consensus	49.3525	0.0313175	0	1
LYa_b1_contig_11787 (40..427) consensus	49.2607	0.000639814	0.030529	1
LYa_b1_contig_37819 (309..549) consensus	49.2549	0.0211259	0	1
LYa_b1_contig_126436 (192..618) consensus	49.191	0.0241626	0	1
LYa_b1_contig_28881 (10..542) consensus	49.1186	0.0240122	0	1
LYa_b1_contig_47891 (74..304) consensus	49.0919	0.0214438	0	1
LYa_b1_contig_225567 (94..829) consensus	49.0462	0.0236472	0	1
LYa_b1_contig_67474 (1..204) consensus	49.0255	0.0222028	0	1
LYa_b1_contig_253172 (188..560) consensus	48.9908	0.0231942	0	1
LYa_b1_contig_191529 (53..484) consensus	48.9864	0.0216744	0	1
LYa_b1_contig_69978 (36..371) consensus	48.9419	0.0260979	0	1
LYa_b1_contig_20759 (45..405) consensus	48.9419	0.0260911	0	1
LYa_b1_contig_130545 (1..221) consensus	48.8744	0.0253182	0	1
LYa_b1_contig_85368 (98..341) consensus	48.8744	0.0253223	0	1
LYa_b1_contig_120789 (5..529) consensus	48.8247	0.0213587	0	1
LYa_b1_contig_170704 (380..738) consensus	48.7593	0.0293079	0	1
LYa_b1_contig_17454 (455..696) consensus	48.6636	0.0242907	0	1
LYa_b1_contig_102015 (205..452) consensus	48.4265	0.0354216	0	1
LYa_b1_contig_122549 (3756..4005) consensus	48.4265	0.03542	0	1
LYa_b1_contig_70543 (2106..2367) consensus	48.4265	0.0354192	0	1
LYa_b1_contig_108904 (653..1006) consensus	48.4265	0.035423	0	1
LYa_b1_contig_299109 (31..442) consensus	48.4265	0.0354229	0	1
LYa_b1_contig_21324 (1..414) consensus	48.4265	0.0354273	0	1
LYa_b1_contig_261409 (765..1281) consensus	48.4265	0.03543	0	1
LYa_b1_contig_59555 (108..682) consensus	48.4265	0.0354509	0	1
LYa_b1_contig_352862 (247..941) consensus	48.4265	0.0354404	0	1
LYa_b1_contig_112839 (22..281) consensus	48.3485	0.0279382	0	1
LYa_b1_contig_29642 (1..562) consensus	48.3042	6.00805e-07	0.000184182	0
LYa_b1_contig_349539 (77..438) consensus	48.3003	0.00146523	0.0528521	1
LYa_b1_contig_170654 (107..307) consensus	48.2324	0.0340398	0	1
LYa_b1_contig_156199 (511..739) consensus	48.2324	0.0340362	0	1
LYa_b1_contig_299117 (97..339) consensus	48.2324	0.0340347	0	1
LYa_b1_contig_198454 (69..350) consensus	48.2324	0.0340473	0	1
LYa_b1_contig_73183 (502..786) consensus	48.2324	0.0340316	0	1
LYa_b1_contig_303703 (1..303) consensus	48.2324	0.0340329	0	1
LYa_b1_contig_297184 (54..364) consensus	48.2324	0.0340514	0	1
LYa_b1_contig_298941 (174..487) consensus	48.2324	0.0340622	0	1
LYa_b1_contig_161823 (32..358) consensus	48.2324	0.0340599	0	1
LYa_b1_contig_130994 (18..502) consensus	48.2324	0.0340563	0	1
LYa_b1_contig_199291 (4..617) consensus	48.2324	0.0340618	0	1
LYa_b1_contig_296997 (651..1293) consensus	48.2324	0.0340646	0	1
LYa_b1_contig_175122 (25..777) consensus	48.2324	0.0340575	0	1
LYa_b1_contig_323226 (12..349) consensus	48.1692	0.0280744	0	1
LYa_b1_contig_107788 (27..376) consensus	48.1205	0.0253831	0	1
LYa_b1_contig_59660 (22..2500) consensus	48.036	3.61891e-05	0.00409962	1
LYa_b1_contig_5976 (1..726) consensus	47.9339	5.36266e-08	2.71988e-05	0
LYa_b1_contig_141696 (65..419) consensus	47.9169	0.0301327	0	1
LYa_b1_contig_305558 (71..604) consensus	47.9143	0.0294867	0	1
LYa_b1_contig_17231 (1..374) consensus	47.8444	0.0249365	0	1
LYa_b1_contig_22577 (1..207) consensus	47.755	0.030307	0	1
LYa_b1_contig_56610 (7..313) consensus	47.6792	0.0267517	0	1
LYa_b1_contig_20260 (1..336) consensus	47.6792	0.0267506	0	1
LYa_b1_contig_96737 (354..1228) consensus	47.6107	0.00114975	0.0454066	1
LYa_b1_contig_292327 (255..710) consensus	47.5944	0.0268882	0	1
LYa_b1_contig_548 (1..374) consensus	47.5191	3.8534e-11	6.11138e-08	0
LYa_b1_contig_103623 (28..1097) consensus	47.4829	4.44178e-05	0.00475166	1
LYa_b1_contig_88026 (42..345) consensus	47.4256	0.0272344	0	1
LYa_b1_contig_52778 (510..822) consensus	47.3414	0.0272189	0	1
LYa_b1_contig_15023 (140..759) consensus	47.3414	0.027218	0	1
LYa_b1_contig_53132 (1..2842) consensus	47.3177	0.0240633	0	1
LYa_b1_contig_360004 (125..496) consensus	47.2724	0.0256731	0	1
LYa_b1_contig_161321 (1..232) consensus	47.2536	0.024843	0	1
LYa_b1_contig_44923 (642..1618) consensus	47.2536	0.0248402	0	1
LYa_b1_contig_43703 (40..618) consensus	47.2475	0.0320892	0	1
LYa_b1_contig_34574 (621..829) consensus	47.1612	0.0332272	0	1
LYa_b1_contig_36478 (40..271) consensus	47.1612	0.0332176	0	1
LYa_b1_contig_2814 (2088..2324) consensus	47.1612	0.0332117	0	1
LYa_b1_contig_27865 (53..306) consensus	47.1612	0.0331961	0	1
LYa_b1_contig_6410 (1..261) consensus	47.1612	0.0331952	0	1
LYa_b1_contig_440663 (1..300) consensus	47.1612	0.0332087	0	1
LYa_b1_contig_76116 (43..426) consensus	47.1612	0.0332068	0	1
LYa_b1_contig_11082 (1212..1821) consensus	47.1612	0.0332064	0	1
LYa_b1_contig_170704 (3141..4395) consensus	47.0041	4.23343e-05	0.00460382	1
LYa_b1_contig_296513 (46..571) consensus	46.9485	0.0253084	0	1
LYa_b1_contig_132153 (67..350) consensus	46.9214	0.00166268	0.0572672	1
LYa_b1_contig_123508 (1..418) consensus	46.8192	0.024742	0	1
LYa_b1_contig_130191 (569..1168) consensus	46.7858	0.0254859	0	1
LYa_b1_contig_31240 (34..1570) consensus	46.6887	1.59229e-05	0.00225751	1
LYa_b1_contig_65428 (3..262) consensus	46.6724	0.0271335	0	1
LYa_b1_contig_239826 (100..503) consensus	46.6226	0.0259278	0	1
LYa_b1_contig_154107 (1..211) consensus	46.5628	0.024704	0	1
LYa_b1_contig_25810 (132..1205) consensus	46.5615	1.66311e-06	0.000405297	0
LYa_b1_contig_8195 (54..259) consensus	46.4797	0.0308582	0	1
LYa_b1_contig_14781 (19..678) consensus	46.4526	2.91284e-05	0.00350649	1
LYa_b1_contig_102037 (55..327) consensus	46.3526	0.024718	0	1
LYa_b1_contig_193555 (1..285) consensus	46.3526	0.0247269	0	1
LYa_b1_contig_321309 (94..294) consensus	46.2946	0.0278857	0	1
LYa_b1_contig_37849 (1..347) consensus	46.1559	0.0309579	0	1
LYa_b1_contig_22446 (1..276) consensus	46.1356	0.0237065	0	1
LYa_b1_contig_171452 (1..202) consensus	46.1299	0.029299	0	1
LYa_b1_contig_49439 (320..1058) consensus	46.112	2.06246e-09	1.82365e-06	0
LYa_b1_contig_36703 (8..320) consensus	46.0682	0.0301059	0	1
LYa_b1_contig_300908 (185..897) consensus	46.0089	0.00070644	0.0327691	1
LYa_b1_contig_89447 (1..240) consensus	45.9742	0.0304356	0	1
LYa_b1_contig_336928 (1132..2234) consensus	45.924	1.59538e-05	0.00225785	1
LYa_b1_contig_74906 (56..466) consensus	45.9075	0.0266628	0	1
LYa_b1_contig_140742 (1..238) consensus	45.8595	0.0266839	0	1
LYa_b1_contig_44027 (148..349) consensus	45.6324	0.0369258	0	1
LYa_b1_contig_350004 (151..379) consensus	45.6324	0.0369258	0	1
LYa_b1_contig_349811 (36..282) consensus	45.6324	0.0369341	0	1
LYa_b1_contig_353782 (502..779) consensus	45.6324	0.0369424	0	1
LYa_b1_contig_116408 (132..410) consensus	45.6324	0.0369397	0	1
LYa_b1_contig_313157 (282..613) consensus	45.6324	0.0369345	0	1
LYa_b1_contig_58254 (1832..2176) consensus	45.6324	0.0369218	0	1
LYa_b1_contig_348890 (1..377) consensus	45.6324	0.036916	0	1
LYa_b1_contig_100809 (67..446) consensus	45.6324	0.0369142	0	1
LYa_b1_contig_355737 (25..460) consensus	45.6324	0.0369131	0	1
LYa_b1_contig_355466 (200..797) consensus	45.6324	0.0369161	0	1
LYa_b1_contig_349772 (44..831) consensus	45.6324	0.0369212	0	1
LYa_b1_contig_57337 (1..562) consensus	45.6183	4.88534e-06	0.000922895	1
LYa_b1_contig_50220 (120..544) consensus	45.6017	3.00511e-05	0.00360022	1
LYa_b1_contig_45106 (702..1084) consensus	45.563	0.0336441	0	1
LYa_b1_contig_55655 (1..1246) consensus	45.4503	5.14256e-07	0.000164727	0
LYa_b1_contig_90051 (5..354) consensus	45.3813	0.0246113	0	1
LYa_b1_contig_181159 (46..568) consensus	45.3495	0.000212552	0.0145112	1
LYa_b1_contig_97759 (1..318) consensus	45.2773	0.0239952	0	1
LYa_b1_contig_298782 (168..388) consensus	45.272	0.0373244	0	1
LYa_b1_contig_56344 (1..222) consensus	45.272	0.03731	0	1
LYa_b1_contig_296422 (2313..2539) consensus	45.272	0.0372976	0	1
LYa_b1_contig_22198 (1..244) consensus	45.272	0.0372976	0	1
LYa_b1_contig_296436 (356..636) consensus	45.272	0.0372945	0	1
LYa_b1_contig_296997 (119..479) consensus	45.272	0.0372851	0	1
LYa_b1_contig_301008 (7..368) consensus	45.272	0.037267	0	1
LYa_b1_contig_302336 (934..1406) consensus	45.272	0.0372611	0	1
LYa_b1_contig_643 (1..1124) consensus	45.2161	6.08366e-15	3.03927e-11	0
LYa_b1_contig_84330 (50..398) consensus	45.1134	0.0342779	0	1
LYa_b1_contig_296480 (1650..2037) consensus	45.1134	0.034283	0	1
LYa_b1_contig_162985 (38..255) consensus	45.106	0.0276711	0	1
LYa_b1_contig_187715 (72..749) consensus	45.0435	0.034886	0	1
LYa_b1_contig_47778 (1971..2518) consensus	45.0065	0.0262138	0	1
LYa_b1_contig_81590 (121..352) consensus	44.97	0.0371792	0	1
LYa_b1_contig_20174 (1..275) consensus	44.97	0.0371746	0	1
LYa_b1_contig_76549 (310..631) consensus	44.97	0.0371931	0	1
LYa_b1_contig_10666 (1..386) consensus	44.97	0.0371939	0	1
LYa_b1_contig_95872 (1..903) consensus	44.97	0.0371931	0	1
LYa_b1_contig_205070 (539..892) consensus	44.9543	0.0322306	0	1
LYa_b1_contig_51545 (83..2511) consensus	44.8036	2.8857e-09	2.44345e-06	0
LYa_b1_contig_297861 (13..363) consensus	44.6346	0.0293896	0	1
LYa_b1_contig_169436 (25..422) consensus	44.6346	0.0293859	0	1
LYa_b1_contig_182756 (21..659) consensus	44.5818	0.0251743	0	1
LYa_b1_contig_73759 (5..230) consensus	44.474	0.0285891	0	1
LYa_b1_contig_30373 (236..471) consensus	44.4546	0.0334108	0	1
LYa_b1_contig_74037 (134..427) consensus	44.4546	0.0334128	0	1
LYa_b1_contig_296920 (181..1205) consensus	44.3449	9.97991e-05	0.00853889	1
LYa_b1_contig_29560 (832..1379) consensus	44.3317	0.000292004	0.0180992	1
LYa_b1_contig_24575 (226..470) consensus	44.2987	0.0289249	0	1
LYa_b1_contig_17021 (1..255) consensus	44.2987	0.0289113	0	1
LYa_b1_contig_45578 (1..339) consensus	44.2987	0.0289107	0	1
LYa_b1_contig_17454 (787..1448) consensus	44.2954	1.4317e-05	0.00209299	1
LYa_b1_contig_3001 (15..874) consensus	44.2819	1.97194e-05	0.0026376	1
LYa_b1_contig_168712 (41..489) consensus	44.2587	0.0249481	0	1
LYa_b1_contig_22879 (1..506) consensus	44.2021	0.0308382	0	1
LYa_b1_contig_162959 (1622..2149) consensus	44.1511	0.0278358	0	1
LYa_b1_contig_75339 (1..1632) consensus	44.13	1.32683e-06	0.000339926	0
LYa_b1_contig_84080 (705..1147) consensus	44.1251	0.0325524	0	1
LYa_b1_contig_23136 (32..1414) consensus	44.1107	5.13656e-05	0.00536242	1
LYa_b1_contig_83278 (799..1869) consensus	44.1026	0.000429379	0.0237683	1
LYa_b1_contig_98792 (85..1429) consensus	44.0536	2.3282e-07	8.77826e-05	0
LYa_b1_contig_169370 (8..333) consensus	43.9644	0.000438187	0.0240825	1
LYa_b1_contig_300732 (273..592) consensus	43.8262	0.0281658	0	1
LYa_b1_contig_120100 (6..360) consensus	43.7701	0.0264018	0	1
LYa_b1_contig_200882 (77..552) consensus	43.7701	0.0264003	0	1
LYa_b1_contig_14601 (97..534) consensus	43.7682	0.0341539	0	1
LYa_b1_contig_88837 (350..718) consensus	43.6629	0.0288532	0	1
LYa_b1_contig_5846 (30..3895) consensus	43.6238	6.93981e-21	1.3868e-16	0
LYa_b1_contig_79966 (150..361) consensus	43.5601	0.0274643	0	1
LYa_b1_contig_18364 (1129..1537) consensus	43.5325	0.0358554	0	1
LYa_b1_contig_12258 (866..1285) consensus	43.5055	0.0252941	0	1
LYa_b1_contig_19734 (554..774) consensus	43.4991	0.0298915	0	1
LYa_b1_contig_310662 (55..320) consensus	43.4991	0.0298963	0	1
LYa_b1_contig_32754 (1..1082) consensus	43.4846	3.35427e-07	0.000117184	0
LYa_b1_contig_71746 (2306..2931) consensus	43.3847	4.41009e-05	0.00473149	1
LYa_b1_contig_56876 (32..540) consensus	43.34	0.0268972	0	1
LYa_b1_contig_12291 (1..427) consensus	43.3264	5.25916e-08	2.68099e-05	0
LYa_b1_contig_57274 (12..397) consensus	43.176	9.0111e-06	0.00146237	1
LYa_b1_contig_62048 (1..309) consensus	43.1299	0.0280028	0	1
LYa_b1_contig_4716 (1..203) consensus	43.1188	0.0293161	0	1
LYa_b1_contig_88902 (358..664) consensus	43.0165	0.0332607	0	1
LYa_b1_contig_78494 (1..343) consensus	43.0165	0.0332514	0	1
LYa_b1_contig_101424 (644..1021) consensus	43.0165	0.0332527	0	1
LYa_b1_contig_182403 (1..208) consensus	43.0043	0.0357175	0	1
LYa_b1_contig_65674 (1994..2241) consensus	43.0043	0.0357208	0	1
LYa_b1_contig_12882 (1337..1782) consensus	43.0043	0.0357144	0	1
LYa_b1_contig_72318 (58..720) consensus	42.969	0.0274112	0	1
LYa_b1_contig_107744 (16..440) consensus	42.9528	0.0312333	0	1
LYa_b1_contig_118956 (25..672) consensus	42.9497	0.000377958	0.0218051	1
LYa_b1_contig_36185 (997..2672) consensus	42.9459	8.67477e-06	0.00142323	1
LYa_b1_contig_349529 (1..216) consensus	42.8382	0.0388605	0	1
LYa_b1_contig_90002 (1068..1286) consensus	42.8382	0.0388814	0	1
LYa_b1_contig_349561 (1..240) consensus	42.8382	0.0388788	0	1
LYa_b1_contig_350926 (26..267) consensus	42.8382	0.0388761	0	1
LYa_b1_contig_350340 (300..605) consensus	42.8382	0.0388791	0	1
LYa_b1_contig_12882 (4338..4666) consensus	42.8382	0.0388854	0	1
LYa_b1_contig_18247 (148..476) consensus	42.8382	0.0388798	0	1
LYa_b1_contig_349923 (187..520) consensus	42.8382	0.038876	0	1
LYa_b1_contig_351706 (24..415) consensus	42.8382	0.0388742	0	1
LYa_b1_contig_296256 (511..1038) consensus	42.8382	0.0388684	0	1
LYa_b1_contig_229217 (33..650) consensus	42.8382	0.0388711	0	1
LYa_b1_contig_352360 (41..670) consensus	42.8382	0.0388705	0	1
LYa_b1_contig_65992 (34..358) consensus	42.8075	0.0271297	0	1
LYa_b1_contig_18977 (775..980) consensus	42.7787	0.0401084	0	1
LYa_b1_contig_119134 (241..455) consensus	42.7787	0.0401064	0	1
LYa_b1_contig_10667 (9..243) consensus	42.7787	0.0401031	0	1
LYa_b1_contig_81215 (71..307) consensus	42.7787	0.0401002	0	1
LYa_b1_contig_82176 (351..611) consensus	42.7787	0.040094	0	1
LYa_b1_contig_29485 (1..275) consensus	42.7787	0.0400846	0	1
LYa_b1_contig_60224 (392..676) consensus	42.7787	0.0400825	0	1
LYa_b1_contig_76528 (125..566) consensus	42.7787	0.0400824	0	1
LYa_b1_contig_17496 (200..749) consensus	42.7787	0.0400832	0	1
LYa_b1_contig_88105 (59..358) consensus	42.7525	0.0258776	0	1
LYa_b1_contig_124678 (50..771) consensus	42.7525	0.025878	0	1
LYa_b1_contig_37596 (12..1789) consensus	42.6511	6.2245e-08	3.00448e-05	0
LYa_b1_contig_159960 (8..231) consensus	42.5696	0.000332003	0.0197338	1
LYa_b1_contig_60964 (1..879) consensus	42.5404	0.00128777	0.0485726	1
LYa_b1_contig_39230 (1179..1451) consensus	42.5287	0.0298703	0	1
LYa_b1_contig_52200 (155..542) consensus	42.3616	0.0331933	0	1
LYa_b1_contig_203400 (646..884) consensus	42.3115	0.0403913	0	1
LYa_b1_contig_38328 (2365..2633) consensus	42.3115	0.0403834	0	1
LYa_b1_contig_298289 (153..422) consensus	42.3115	0.0403472	0	1
LYa_b1_contig_117911 (9..287) consensus	42.3115	0.040347	0	1
LYa_b1_contig_298303 (87..390) consensus	42.3115	0.040341	0	1
LYa_b1_contig_194816 (20..324) consensus	42.3115	0.0403856	0	1
LYa_b1_contig_150704 (849..1237) consensus	42.3115	0.0403988	0	1
LYa_b1_contig_66604 (354..744) consensus	42.3115	0.0404068	0	1
LYa_b1_contig_125984 (20..441) consensus	42.3115	0.0404116	0	1
LYa_b1_contig_89061 (136..543) consensus	42.265	0.032752	0	1
LYa_b1_contig_297335 (14..259) consensus	42.25	0.0368435	0	1
LYa_b1_contig_80612 (1747..2101) consensus	42.25	0.036845	0	1
LYa_b1_contig_33096 (1..2078) consensus	42.2346	4.0197e-20	4.74358e-16	0
LYa_b1_contig_47083 (492..837) consensus	42.2167	0.0272246	0	1
LYa_b1_contig_57577 (1..388) consensus	42.1558	0.0309786	0	1
LYa_b1_contig_165106 (135..540) consensus	42.1532	0.0373457	0	1
LYa_b1_contig_110528 (657..1199) consensus	42.1352	0.0001757	0.0126661	1
LYa_b1_contig_130904 (1122..1800) consensus	42.0985	0.0307289	0	1
LYa_b1_contig_105357 (1..1229) consensus	42.0558	3.86366e-06	0.000765955	1
LYa_b1_contig_166803 (61..357) consensus	42.0551	0.0271646	0	1
LYa_b1_contig_59455 (1..461) consensus	42.0334	2.81974e-06	0.000611142	1
LYa_b1_contig_12853 (48..435) consensus	41.9954	0.0301698	0	1
LYa_b1_contig_31450 (81..421) consensus	41.9196	0.00145149	0.0526186	1
LYa_b1_contig_296202 (209..524) consensus	41.8349	0.0334047	0	1
LYa_b1_contig_161509 (41..253) consensus	41.7864	0.0281932	0	1
LYa_b1_contig_61427 (1..334) consensus	41.7864	0.028192	0	1
LYa_b1_contig_27661 (657..1345) consensus	41.6733	0.0288413	0	1
LYa_b1_contig_110870 (1109..1459) consensus	41.5606	0.0386564	0	1
LYa_b1_contig_126845 (1349..2165) consensus	41.5606	0.038653	0	1
LYa_b1_contig_52383 (1..812) consensus	41.5308	6.11247e-07	0.000186199	0
LYa_b1_contig_309909 (46..391) consensus	41.3533	0.0307927	0	1
LYa_b1_contig_982 (1923..2197) consensus	41.3483	0.03192	0	1
LYa_b1_contig_252780 (529..1698) consensus	41.337	0.000119118	0.00968758	1
LYa_b1_contig_24034 (1..1093) consensus	41.2959	5.05218e-06	0.00094354	1
LYa_b1_contig_79566 (11..801) consensus	41.2726	0.000569587	0.0284554	1
LYa_b1_contig_98345 (11..336) consensus	41.2467	0.0281052	0	1
LYa_b1_contig_146826 (249..646) consensus	41.1949	0.0290464	0	1
LYa_b1_contig_182804 (24..326) consensus	41.1917	0.0305406	0	1
LYa_b1_contig_136074 (14..274) consensus	41.1788	0.0389868	0	1
LYa_b1_contig_70182 (553..837) consensus	41.1788	0.0389753	0	1
LYa_b1_contig_144630 (86..1386) consensus	41.089	1.21706e-06	0.000320853	0
LYa_b1_contig_63437 (333..559) consensus	40.9235	0.0311675	0	1
LYa_b1_contig_41626 (3..278) consensus	40.9201	0.0309738	0	1
LYa_b1_contig_8943 (2784..3109) consensus	40.9201	0.0309737	0	1
LYa_b1_contig_27675 (247..3868) consensus	40.8472	5.79798e-12	1.2069e-08	0
LYa_b1_contig_9206 (1..296) consensus	40.8098	0.037401	0	1
LYa_b1_contig_203828 (123..467) consensus	40.8098	0.0374072	0	1
LYa_b1_contig_26170 (185..411) consensus	40.7626	0.0321485	0	1
LYa_b1_contig_41681 (1..2192) consensus	40.7228	3.40147e-06	0.000699304	1
LYa_b1_contig_53376 (540..759) consensus	40.7097	0.0313554	0	1
LYa_b1_contig_85106 (15..270) consensus	40.7097	0.0313509	0	1
LYa_b1_contig_107788 (605..941) consensus	40.7097	0.0313521	0	1
LYa_b1_contig_107748 (144..362) consensus	40.5873	0.0435292	0	1
LYa_b1_contig_103083 (77..335) consensus	40.5873	0.0435319	0	1
LYa_b1_contig_1650 (379..645) consensus	40.5873	0.0435584	0	1
LYa_b1_contig_145800 (23..394) consensus	40.5873	0.0435555	0	1
LYa_b1_contig_18012 (1..392) consensus	40.5873	0.0435498	0	1
LYa_b1_contig_15481 (2794..3291) consensus	40.5873	0.043548	0	1
LYa_b1_contig_59529 (5..654) consensus	40.5873	0.0435517	0	1
LYa_b1_contig_190153 (14..324) consensus	40.5507	0.0279407	0	1
LYa_b1_contig_154062 (109..379) consensus	40.4941	0.0298546	0	1
LYa_b1_contig_100922 (400..715) consensus	40.4941	0.0298563	0	1
LYa_b1_contig_75033 (37..266) consensus	40.4922	0.0328667	0	1
LYa_b1_contig_32510 (64..280) consensus	40.4854	0.0336474	0	1
LYa_b1_contig_73769 (854..1334) consensus	40.4854	0.033642	0	1
LYa_b1_contig_93680 (27..1418) consensus	40.4456	0.000163512	0.0120572	1
LYa_b1_contig_69935 (1444..1784) consensus	40.4435	0.0293063	0	1
LYa_b1_contig_90996 (180..611) consensus	40.3308	0.0315105	0	1
LYa_b1_contig_174991 (32..257) consensus	40.2775	0.0306026	0	1
LYa_b1_contig_68427 (135..564) consensus	40.2098	0.0383774	0	1
LYa_b1_contig_30173 (40..284) consensus	40.1676	0.035688	0	1
LYa_b1_contig_148251 (473..1225) consensus	40.1676	0.0356681	0	1
LYa_b1_contig_21906 (1..446) consensus	40.1092	0.00018051	0.0129278	1
LYa_b1_contig_3228 (1..573) consensus	40.0709	0.000754959	0.0345071	1
LYa_b1_contig_157881 (32..347) consensus	40.0593	0.0364297	0	1
LYa_b1_contig_350243 (1..206) consensus	40.0441	0.0419421	0	1
LYa_b1_contig_70543 (1852..2058) consensus	40.0441	0.0419435	0	1
LYa_b1_contig_243219 (1..215) consensus	40.0441	0.0419449	0	1
LYa_b1_contig_350624 (46..279) consensus	40.0441	0.0419435	0	1
LYa_b1_contig_350557 (127..386) consensus	40.0441	0.0419406	0	1
LYa_b1_contig_352633 (1..268) consensus	40.0441	0.0419392	0	1
LYa_b1_contig_306317 (726..1015) consensus	40.0441	0.0419364	0	1
LYa_b1_contig_351198 (4..302) consensus	40.0441	0.0419397	0	1
LYa_b1_contig_351084 (21..360) consensus	40.0441	0.041938	0	1
LYa_b1_contig_100142 (734..1179) consensus	40.0441	0.041916	0	1
LYa_b1_contig_296256 (50..507) consensus	40.0441	0.0418757	0	1
LYa_b1_contig_349546 (2647..3110) consensus	40.0441	0.0418704	0	1
LYa_b1_contig_123711 (970..1569) consensus	40.0441	0.0418749	0	1
LYa_b1_contig_152004 (188..913) consensus	40.0441	0.041901	0	1
LYa_b1_contig_61569 (2245..2626) consensus	40.0116	0.0323321	0	1
LYa_b1_contig_70291 (64..509) consensus	40.0116	0.0323295	0	1
LYa_b1_contig_64958 (1971..2318) consensus	39.9006	0.0340403	0	1
LYa_b1_contig_10234 (824..1037) consensus	39.8972	0.0332091	0	1
LYa_b1_contig_87735 (12..356) consensus	39.7987	0.0288439	0	1
LYa_b1_contig_128721 (145..447) consensus	39.7415	0.0323823	0	1
LYa_b1_contig_85610 (1752..2025) consensus	39.6881	0.0301453	0	1
LYa_b1_contig_170428 (246..601) consensus	39.6881	0.0301439	0	1
LYa_b1_contig_124463 (457..719) consensus	39.6221	0.036504	0	1
LYa_b1_contig_72016 (10..296) consensus	39.5319	0.0292167	0	1
LYa_b1_contig_71746 (1365..2303) consensus	39.5218	1.1986e-05	0.00185386	1
LYa_b1_contig_61428 (51..369) consensus	39.4237	0.00030295	0.0185379	1
LYa_b1_contig_8003 (517..1131) consensus	39.4198	1.00787e-07	4.47566e-05	0
LYa_b1_contig_298466 (2..429) consensus	39.3869	5.23325e-05	0.0054185	1
LYa_b1_contig_296122 (275..493) consensus	39.3512	0.0436163	0	1
LYa_b1_contig_286880 (1469..1704) consensus	39.3512	0.043624	0	1
LYa_b1_contig_297062 (1..244) consensus	39.3512	0.0436399	0	1
LYa_b1_contig_123038 (142..396) consensus	39.3512	0.0436508	0	1
LYa_b1_contig_249120 (209..465) consensus	39.3512	0.0436554	0	1
LYa_b1_contig_19958 (9..279) consensus	39.3512	0.0436593	0	1
LYa_b1_contig_297829 (609..885) consensus	39.3512	0.0436612	0	1
LYa_b1_contig_308010 (96..378) consensus	39.3512	0.0436618	0	1
LYa_b1_contig_187464 (107..427) consensus	39.3512	0.043638	0	1
LYa_b1_contig_155751 (38..380) consensus	39.3512	0.043629	0	1
LYa_b1_contig_298206 (45..410) consensus	39.3512	0.0436263	0	1
LYa_b1_contig_64543 (423..823) consensus	39.3512	0.0436281	0	1
LYa_b1_contig_188261 (607..1065) consensus	39.3512	0.0436283	0	1
LYa_b1_contig_299356 (1..547) consensus	39.3512	0.0436151	0	1
LYa_b1_contig_38649 (90..582) consensus	39.3146	0.0321674	0	1
LYa_b1_contig_91856 (1854..2130) consensus	39.3089	0.0357265	0	1
LYa_b1_contig_10234 (168..376) consensus	39.3089	0.0330256	0	1
LYa_b1_contig_8623 (44..662) consensus	39.3089	0.0330274	0	1
LYa_b1_contig_91856 (595..999) consensus	39.2609	0.0327701	0	1
LYa_b1_contig_91550 (69..335) consensus	39.2071	0.0342474	0	1
LYa_b1_contig_53376 (1700..2077) consensus	39.2071	0.0342495	0	1
LYa_b1_contig_176243 (156..458) consensus	39.1931	0.0402104	0	1
LYa_b1_contig_80612 (3245..4489) consensus	39.1569	0.000929061	0.0395013	1
LYa_b1_contig_53483 (125..721) consensus	39.1475	0.0417283	0	1
LYa_b1_contig_173385 (1..1563) consensus	39.1252	7.06553e-05	0.00662251	1
LYa_b1_contig_62384 (80..914) consensus	39.048	5.44783e-05	0.00559024	1
LYa_b1_contig_42157 (1..521) consensus	38.9481	3.04099e-05	0.00361719	1
LYa_b1_contig_110526 (18..365) consensus	38.9414	0.0305156	0	1
LYa_b1_contig_81003 (55..355) consensus	38.8694	0.0383077	0	1
LYa_b1_contig_84294 (3..470) consensus	38.8694	0.0383057	0	1
LYa_b1_contig_22422 (14..252) consensus	38.8309	0.0309429	0	1
LYa_b1_contig_62206 (191..1184) consensus	38.7411	0.000633904	0.0303484	1
LYa_b1_contig_39230 (445..674) consensus	38.7205	0.0331949	0	1
LYa_b1_contig_41090 (101..420) consensus	38.6704	0.030332	0	1
LYa_b1_contig_199323 (27..320) consensus	38.6014	0.0418301	0	1
LYa_b1_contig_81010 (37..328) consensus	38.5588	0.0351883	0	1
LYa_b1_contig_31334 (1660..2042) consensus	38.5588	0.0351938	0	1
LYa_b1_contig_65536 (1729..1957) consensus	38.555	0.0343074	0	1
LYa_b1_contig_245068 (161..722) consensus	38.555	0.0343075	0	1
LYa_b1_contig_101018 (1899..2283) consensus	38.5093	0.0302901	0	1
LYa_b1_contig_205483 (19..290) consensus	38.4432	0.0386048	0	1
LYa_b1_contig_83720 (21..326) consensus	38.4432	0.0386102	0	1
LYa_b1_contig_296069 (1..417) consensus	38.4424	1.29518e-05	0.00197571	1
LYa_b1_contig_72140 (1..208) consensus	38.3959	0.0468096	0	1
LYa_b1_contig_39876 (141..400) consensus	38.3959	0.0467844	0	1
LYa_b1_contig_107651 (67..331) consensus	38.3959	0.046789	0	1
LYa_b1_contig_76468 (23..302) consensus	38.3959	0.0467952	0	1
LYa_b1_contig_45501 (1954..2247) consensus	38.3959	0.0468013	0	1
LYa_b1_contig_16400 (418..718) consensus	38.3959	0.0468069	0	1
LYa_b1_contig_9507 (741..1049) consensus	38.3959	0.0468053	0	1
LYa_b1_contig_74965 (52..403) consensus	38.3959	0.0467675	0	1
LYa_b1_contig_58154 (840..1221) consensus	38.3959	0.046769	0	1
LYa_b1_contig_62392 (33..460) consensus	38.3959	0.0467598	0	1
LYa_b1_contig_34274 (84..513) consensus	38.3959	0.0467427	0	1
LYa_b1_contig_54114 (113..563) consensus	38.3959	0.046749	0	1
LYa_b1_contig_82867 (24..483) consensus	38.3959	0.0467511	0	1
LYa_b1_contig_58743 (980..1483) consensus	38.3959	0.0467509	0	1
LYa_b1_contig_37335 (97..631) consensus	38.3959	0.0467451	0	1
LYa_b1_contig_98946 (38..593) consensus	38.3959	0.0467404	0	1
LYa_b1_contig_2921 (284..933) consensus	38.3959	0.0467154	0	1
LYa_b1_contig_45048 (1..243) consensus	38.394	0.0340011	0	1
LYa_b1_contig_153745 (12..929) consensus	38.3852	0.00063114	0.030291	1
LYa_b1_contig_206236 (249..710) consensus	38.3525	4.84398e-07	0.000157652	0
LYa_b1_contig_147470 (152..505) consensus	38.282	0.0373773	0	1
LYa_b1_contig_31388 (3763..4151) consensus	38.282	0.0373766	0	1
LYa_b1_contig_305843 (69..306) consensus	38.2324	0.0341671	0	1
LYa_b1_contig_297873 (96..844) consensus	38.2291	0.000186444	0.0132285	1
LYa_b1_contig_118296 (1..216) consensus	38.1853	0.0312185	0	1
LYa_b1_contig_80752 (22..296) consensus	38.1322	0.0336752	0	1
LYa_b1_contig_5476 (31..426) consensus	38.1322	0.0336732	0	1
LYa_b1_contig_42442 (143..388) consensus	37.9198	0.0308751	0	1
LYa_b1_contig_302787 (56..398) consensus	37.9074	0.0355908	0	1
LYa_b1_contig_112707 (19..573) consensus	37.8684	0.0318633	0	1
LYa_b1_contig_50544 (58..287) consensus	37.809	0.0352983	0	1
LYa_b1_contig_97691 (1..230) consensus	37.759	1.64356e-05	0.00229997	1
LYa_b1_contig_66783 (8..301) consensus	37.7129	0.00350503	0.0905633	1
LYa_b1_contig_113669 (259..823) consensus	37.7129	0.00350749	0.0905726	1
LYa_b1_contig_68544 (633..904) consensus	37.7053	0.0395024	0	1
LYa_b1_contig_139192 (11..211) consensus	37.65	0.0334622	0	1
LYa_b1_contig_125472 (1..277) consensus	37.6435	0.0335551	0	1
LYa_b1_contig_174898 (1..368) consensus	37.4817	0.0337762	0	1
LYa_b1_contig_297508 (411..805) consensus	37.4534	0.000162431	0.0120134	1
LYa_b1_contig_55156 (1100..1386) consensus	37.4401	0.0331675	0	1
LYa_b1_contig_343063 (19..235) consensus	37.4153	0.0416443	0	1
LYa_b1_contig_143237 (710..1120) consensus	37.4153	0.0416462	0	1
LYa_b1_contig_352580 (181..406) consensus	37.2499	0.0458805	0	1
LYa_b1_contig_115548 (15..241) consensus	37.2499	0.0458723	0	1
LYa_b1_contig_238996 (1..244) consensus	37.2499	0.0459008	0	1
LYa_b1_contig_350565 (401..649) consensus	37.2499	0.0459	0	1
LYa_b1_contig_206773 (13..282) consensus	37.2499	0.0458922	0	1
LYa_b1_contig_300359 (23..312) consensus	37.2499	0.0458877	0	1
LYa_b1_contig_135242 (693..1014) consensus	37.2499	0.0458874	0	1
LYa_b1_contig_350324 (9..420) consensus	37.2499	0.045895	0	1
LYa_b1_contig_299403 (3..426) consensus	37.2499	0.0458907	0	1
LYa_b1_contig_113443 (95..790) consensus	37.2499	0.0459022	0	1
LYa_b1_contig_28334 (493..814) consensus	37.2453	1.30751e-05	0.00198241	1
LYa_b1_contig_171013 (20..577) consensus	37.1673	0.000464638	0.024942	1
LYa_b1_contig_8266 (1023..1285) consensus	37.1073	0.0363943	0	1
LYa_b1_contig_13876 (316..747) consensus	37.1073	0.0363925	0	1
LYa_b1_contig_115016 (105..491) consensus	37.0594	0.0355721	0	1
LYa_b1_contig_101793 (827..1410) consensus	37.0594	0.035571	0	1
LYa_b1_contig_30763 (107..466) consensus	37.0101	0.0362645	0	1
LYa_b1_contig_12372 (1..638) consensus	37.0096	2.79216e-05	0.00338981	1
LYa_b1_contig_137544 (4..323) consensus	37.008	0.0318213	0	1
LYa_b1_contig_81208 (59..737) consensus	36.9982	0.000214649	0.0146163	1
LYa_b1_contig_102598 (72..857) consensus	36.9547	0.0436978	0	1
LYa_b1_contig_105667 (9..420) consensus	36.9317	0.00126578	0.0481062	1
LYa_b1_contig_34100 (8..1092) consensus	36.9191	0.00018882	0.0133707	1
LYa_b1_contig_7478 (560..920) consensus	36.9003	0.034038	0	1
LYa_b1_contig_56578 (2745..3042) consensus	36.7312	0.033905	0	1
LYa_b1_contig_34023 (2..1879) consensus	36.6547	7.10428e-07	0.000206948	0
LYa_b1_contig_179373 (687..1001) consensus	36.6256	0.0342859	0	1
LYa_b1_contig_157223 (52..287) consensus	36.5687	0.0348272	0	1
LYa_b1_contig_21350 (1..366) consensus	36.5638	0.000212623	0.0145112	1
LYa_b1_contig_17661 (1..621) consensus	36.5269	0.000160147	0.0119235	1
LYa_b1_contig_78655 (533..1002) consensus	36.52	0.0364427	0	1
LYa_b1_contig_19031 (1..262) consensus	36.4055	0.0362561	0	1
LYa_b1_contig_302575 (162..365) consensus	36.3908	0.0482103	0	1
LYa_b1_contig_298611 (1564..1773) consensus	36.3908	0.048218	0	1
LYa_b1_contig_296616 (141..353) consensus	36.3908	0.048208	0	1
LYa_b1_contig_304723 (1..214) consensus	36.3908	0.0482065	0	1
LYa_b1_contig_296245 (27..243) consensus	36.3908	0.0482092	0	1
LYa_b1_contig_134926 (37..264) consensus	36.3908	0.0482026	0	1
LYa_b1_contig_10360 (44..273) consensus	36.3908	0.0481838	0	1
LYa_b1_contig_233446 (36..268) consensus	36.3908	0.0481849	0	1
LYa_b1_contig_78847 (3..260) consensus	36.3908	0.0482028	0	1
LYa_b1_contig_38352 (28..286) consensus	36.3908	0.0481827	0	1
LYa_b1_contig_299082 (167..428) consensus	36.3908	0.0481775	0	1
LYa_b1_contig_220030 (1..274) consensus	36.3908	0.0481838	0	1
LYa_b1_contig_13605 (1..289) consensus	36.3908	0.0481902	0	1
LYa_b1_contig_114171 (31..337) consensus	36.3908	0.0481907	0	1
LYa_b1_contig_111128 (351..670) consensus	36.3908	0.0481901	0	1
LYa_b1_contig_28779 (108..431) consensus	36.3908	0.0481897	0	1
LYa_b1_contig_304616 (1..345) consensus	36.3908	0.0481701	0	1
LYa_b1_contig_297685 (14..489) consensus	36.3908	0.0481816	0	1
LYa_b1_contig_302336 (316..826) consensus	36.3908	0.0481865	0	1
LYa_b1_contig_87686 (130..641) consensus	36.3908	0.0481924	0	1
LYa_b1_contig_140142 (148..684) consensus	36.3908	0.0482348	0	1
LYa_b1_contig_297842 (165..717) consensus	36.3908	0.0482602	0	1
LYa_b1_contig_305383 (35..1340) consensus	36.3908	0.0482667	0	1
LYa_b1_contig_45019 (1..1469) consensus	36.389	8.18774e-07	0.000229156	0
LYa_b1_contig_43397 (47..296) consensus	36.3536	0.0393542	0	1
LYa_b1_contig_60438 (1..295) consensus	36.3536	0.0393534	0	1
LYa_b1_contig_172456 (16..336) consensus	36.3536	0.0393559	0	1
LYa_b1_contig_55432 (1..344) consensus	36.3536	0.0393592	0	1
LYa_b1_contig_93124 (45..485) consensus	36.3536	0.0393626	0	1
LYa_b1_contig_51301 (721..1208) consensus	36.3101	0.0363923	0	1
LYa_b1_contig_40248 (168..500) consensus	36.2416	0.0386007	0	1
LYa_b1_contig_309798 (244..743) consensus	36.2331	0.0443884	0	1
LYa_b1_contig_67343 (36..271) consensus	36.2044	0.0493228	0	1
LYa_b1_contig_66339 (127..421) consensus	36.2044	0.049295	0	1
LYa_b1_contig_14128 (130..499) consensus	36.2044	0.0492799	0	1
LYa_b1_contig_18563 (1179..1683) consensus	36.2044	0.0492456	0	1
LYa_b1_contig_32074 (840..1403) consensus	36.2044	0.0492505	0	1
LYa_b1_contig_135944 (20..675) consensus	36.2044	0.0492407	0	1
LYa_b1_contig_120577 (11..1615) consensus	36.2044	0.0492315	0	1
LYa_b1_contig_55404 (1..2783) consensus	36.2044	0.0492178	0	1
LYa_b1_contig_99515 (1..564) consensus	36.1431	0.0337443	0	1
LYa_b1_contig_24034 (1627..3299) consensus	36.0877	8.65264e-07	0.000238869	0
LYa_b1_contig_3560 (1386..1715) consensus	36.0771	0.0419389	0	1
LYa_b1_contig_301243 (219..421) consensus	36.0747	0.0416808	0	1
LYa_b1_contig_152344 (1..334) consensus	36.036	0.035318	0	1
LYa_b1_contig_157675 (958..1828) consensus	36.036	0.0353212	0	1
LYa_b1_contig_165064 (126..503) consensus	35.981	0.0344085	0	1
LYa_b1_contig_229904 (71..479) consensus	35.9157	0.0398967	0	1
LYa_b1_contig_296489 (8..738) consensus	35.9157	0.0399008	0	1
LYa_b1_contig_79565 (1..372) consensus	35.8763	0.0343712	0	1
[truncated: 187,744 more rows]

## Sheet: LYa_m vs  LCo_m Stats
Name	Fold change	P-value	FDR p-value	Bonferroni
LYa_b1_contig_370248 (94..585) consensus	4738.73	3.54486e-07	0.000137507	0
LYa_b1_contig_22552 (18..828) consensus	4154.79	3.68462e-28	2.58701e-23	0
LYa_b1_contig_296651 (634..1987) consensus	3474.15	9.55142e-07	0.000296642	0
LYa_b1_contig_106231 (144..2705) consensus	2852.54	5.21671e-15	4.10725e-11	0
LYa_b1_contig_173314 (763..2939) consensus	2347.38	3.00152e-06	0.000704815	1
LYa_b1_contig_451549 (72..688) consensus	2240.43	3.51861e-06	0.000791812	1
LYa_b1_contig_79909 (1..2049) consensus	1983.92	2.65965e-06	0.00063951	0
LYa_b1_contig_67244 (25..953) consensus	1958.76	5.30295e-06	0.00106011	1
LYa_b1_contig_307721 (17..543) consensus	1485	1.26076e-05	0.00202562	1
LYa_b1_contig_457657 (39..783) consensus	1171.26	2.60614e-05	0.00358783	1
LYa_b1_contig_73703 (1..1163) consensus	1102.23	3.02004e-05	0.00396336	1
LYa_b1_contig_15874 (8..638) consensus	1038.53	1.67293e-05	0.00249911	1
LYa_b1_contig_448050 (1..488) consensus	995.558	4.01954e-05	0.00499416	1
LYa_b1_contig_391369 (1..1991) consensus	905.632	4.92392e-05	0.0057523	1
LYa_b1_contig_457683 (57..501) consensus	863.784	5.8418e-05	0.00656253	1
LYa_b1_contig_299009 (61..761) consensus	863.784	5.84168e-05	0.00656253	1
LYa_b1_contig_53067 (1..1787) consensus	803.85	6.91505e-05	0.00723565	1
LYa_b1_contig_76021 (64..388) consensus	731.803	4.24889e-10	5.7369e-07	0
LYa_b1_contig_295887 (85..414) consensus	656.712	0.0001233	0.0110421	1
LYa_b1_contig_377399 (388..920) consensus	622.443	0.000137581	0.0119165	1
LYa_b1_contig_303679 (153..2447) consensus	622.108	0.000139152	0.0120172	1
LYa_b1_contig_455058 (155..564) consensus	605.249	0.000150087	0.0127422	1
LYa_b1_contig_163620 (25..2097) consensus	590.825	0.000159672	0.0132829	1
LYa_b1_contig_131327 (117..1605) consensus	568.863	0.000172732	0.0140693	1
LYa_b1_contig_84178 (1..362) consensus	562.588	0.000177695	0.0143239	1
LYa_b1_contig_349615 (1..2026) consensus	554.88	0.00016123	0.0133649	1
LYa_b1_contig_343853 (50..891) consensus	551.108	9.12977e-05	0.0089153	1
LYa_b1_contig_399581 (28..1152) consensus	518.241	0.000228806	0.0172336	1
LYa_b1_contig_297271 (1..510) consensus	513.416	0.000137372	0.0119165	1
LYa_b1_contig_139279 (23..895) consensus	505.344	0.000137647	0.0119165	1
LYa_b1_contig_353487 (11..233) consensus	496.493	0.000241784	0.0179449	1
LYa_b1_contig_218837 (661..1948) consensus	495.661	0.000252314	0.0186084	1
LYa_b1_contig_244492 (1..3319) consensus	488.59	4.25253e-11	9.95248e-08	0
LYa_b1_contig_255649 (3..577) consensus	487.172	0.000261739	0.0191028	1
LYa_b1_contig_49048 (1..716) consensus	472.083	0.000166789	0.0137285	1
LYa_b1_contig_249023 (949..1577) consensus	464.447	0.000194512	0.0152666	1
LYa_b1_contig_81906 (3..1001) consensus	454.498	6.79851e-11	1.28894e-07	0
LYa_b1_contig_54206 (369..1639) consensus	452.842	0.000191669	0.0151205	1
LYa_b1_contig_3253 (1..274) consensus	423.741	0.000229009	0.0172336	1
LYa_b1_contig_349436 (1..574) consensus	416.854	0.000398997	0.0256538	1
LYa_b1_contig_350089 (177..1051) consensus	416.549	0.000358593	0.0237745	1
LYa_b1_contig_349967 (286..1384) consensus	386.775	0.000313955	0.0216746	1
LYa_b1_contig_4040 (1..287) consensus	383.635	0.000327087	0.0223613	1
LYa_b1_contig_422314 (15..577) consensus	382.705	0.000475815	0.0292534	1
LYa_b1_contig_20772 (1..329) consensus	381.238	0.000291755	0.0206025	1
LYa_b1_contig_23725 (258..1253) consensus	379.188	0.000300641	0.0209201	1
LYa_b1_contig_457723 (111..337) consensus	364.928	0.000551612	0.0316913	1
LYa_b1_contig_448050 (509..757) consensus	361.79	0.000568988	0.0322781	1
LYa_b1_contig_372014 (10..402) consensus	360.005	0.000332562	0.0226915	1
LYa_b1_contig_7794 (1..979) consensus	359.642	0.000354883	0.0236726	1
LYa_b1_contig_204802 (191..1076) consensus	358.328	0.000577109	0.0325648	1
LYa_b1_contig_2595 (454..992) consensus	356.131	8.3754e-09	6.3918e-06	0
LYa_b1_contig_7020 (1..754) consensus	346.006	0.000624418	0.0342508	1
LYa_b1_contig_342087 (78..1744) consensus	345.503	7.5932e-09	5.92362e-06	0
LYa_b1_contig_31510 (1..846) consensus	343.838	0.000352694	0.0236288	1
LYa_b1_contig_451896 (1..217) consensus	342.644	0.000630306	0.0344125	1
LYa_b1_contig_56635 (2943..5746) consensus	331.51	2.78957e-14	1.63216e-10	0
LYa_b1_contig_381677 (35..1267) consensus	330.238	0.000409284	0.0260292	1
LYa_b1_contig_176839 (1..1046) consensus	330.074	0.000674379	0.0362125	1
LYa_b1_contig_296716 (755..1261) consensus	329.758	0.000383981	0.0250715	1
LYa_b1_contig_186620 (1..3165) consensus	319.064	1.04162e-09	1.21161e-06	0
LYa_b1_contig_259494 (35..624) consensus	315.505	6.08966e-09	4.97164e-06	0
LYa_b1_contig_451800 (22..692) consensus	312.122	0.000819811	0.040997	1
LYa_b1_contig_32586 (149..674) consensus	310.48	0.000784872	0.039841	1
LYa_b1_contig_344257 (228..1320) consensus	308.454	0.000827593	0.0412509	1
LYa_b1_contig_412441 (52..2015) consensus	304.586	0.000842732	0.0417108	1
LYa_b1_contig_50677 (1..713) consensus	298.234	0.000595173	0.0330861	1
LYa_b1_contig_118754 (1..1561) consensus	296.157	0.000908522	0.0441136	1
LYa_b1_contig_453303 (1..205) consensus	295.904	0.000904816	0.0439651	1
LYa_b1_contig_44181 (1326..3179) consensus	294.743	0.000543626	0.0313886	1
LYa_b1_contig_9068 (37..637) consensus	287.064	1.15192e-08	8.51344e-06	0
LYa_b1_contig_296716 (101..706) consensus	284.915	0.000567452	0.0322341	1
LYa_b1_contig_142742 (36..947) consensus	284.399	0.000974079	0.046179	1
LYa_b1_contig_47343 (1..1241) consensus	284.019	0.000599169	0.0332555	1
LYa_b1_contig_13458 (768..1099) consensus	280.647	1.88487e-12	6.61693e-09	0
LYa_b1_contig_297477 (166..1028) consensus	278.238	0.00101436	0.0475749	1
LYa_b1_contig_64913 (52..848) consensus	277.079	0.00102302	0.0477893	1
LYa_b1_contig_238968 (453..1202) consensus	276.688	0.000586279	0.0327472	1
LYa_b1_contig_71648 (1..521) consensus	273.942	0.00106199	0.0489903	1
LYa_b1_contig_349605 (230..585) consensus	273.89	0.00103646	0.0482683	1
LYa_b1_contig_89979 (1964..3090) consensus	266.298	0.000679865	0.0364382	1
LYa_b1_contig_32903 (72..1127) consensus	265.917	0.00112334	0.050698	1
LYa_b1_contig_102620 (1..437) consensus	264.529	0.00113708	0.0510785	1
LYa_b1_contig_127352 (257..719) consensus	264.529	0.00113694	0.0510785	1
LYa_b1_contig_162141 (16..1427) consensus	264.529	0.00113682	0.0510785	1
LYa_b1_contig_457766 (143..692) consensus	264.477	0.00110861	0.0502821	1
LYa_b1_contig_350927 (4..1211) consensus	256.676	0.00121166	0.0534037	1
LYa_b1_contig_24034 (1627..3299) consensus	253.778	0.000771477	0.039451	1
LYa_b1_contig_296135 (1067..1460) consensus	251.094	0.000884117	0.0432772	1
LYa_b1_contig_412545 (4..668) consensus	250.515	0.00128202	0.0554259	1
LYa_b1_contig_349802 (32..763) consensus	247.434	0.00129406	0.0557407	1
LYa_b1_contig_412515 (158..1107) consensus	247.434	0.001294	0.0557407	1
LYa_b1_contig_247273 (45..1185) consensus	245.229	0.00107514	0.0493678	1
LYa_b1_contig_457716 (48..495) consensus	242.567	0.00137614	0.057844	1
LYa_b1_contig_399726 (1..667) consensus	242.567	0.00137226	0.057844	1
LYa_b1_contig_350135 (101..1448) consensus	242.567	0.00137227	0.057844	1
LYa_b1_contig_356389 (63..407) consensus	241.274	0.00139215	0.0583894	1
LYa_b1_contig_297269 (1..947) consensus	235.937	0.00077862	0.0396717	1
LYa_b1_contig_296135 (200..719) consensus	231.93	0.00118068	0.0524995	1
LYa_b1_contig_124333 (106..533) consensus	230.017	0.00156502	0.0635517	1
LYa_b1_contig_3865 (292..1103) consensus	226.88	0.00161095	0.0647433	1
LYa_b1_contig_451547 (3..336) consensus	226.604	0.00122382	0.0538012	1
LYa_b1_contig_127037 (127..1945) consensus	223.742	0.00163925	0.0654312	1
LYa_b1_contig_272547 (439..1455) consensus	222.458	0.00108586	0.0496229	1
LYa_b1_contig_195264 (110..3511) consensus	220.682	0.00120585	0.0532478	1
LYa_b1_contig_45524 (3833..4457) consensus	220.605	0.00171173	0.0673779	1
LYa_b1_contig_351093 (1..322) consensus	220.43	0.00116755	0.0520784	1
LYa_b1_contig_223624 (191..524) consensus	219.484	0.00145842	0.060269	1
LYa_b1_contig_91086 (1..449) consensus	217.467	0.0017616	0.0685988	1
LYa_b1_contig_49093 (8..996) consensus	217.467	0.0017608	0.0685988	1
LYa_b1_contig_350088 (193..761) consensus	210.558	0.000983915	0.046551	1
LYa_b1_contig_89819 (1..406) consensus	210.334	5.86565e-08	3.20829e-05	0
LYa_b1_contig_334947 (60..360) consensus	207.153	0.00134181	0.0572147	1
LYa_b1_contig_302104 (114..513) consensus	205.631	0.00128439	0.0554945	1
LYa_b1_contig_150508 (679..1710) consensus	205.514	0.001308	0.0561346	1
LYa_b1_contig_48935 (1..673) consensus	205.353	2.79849e-08	1.78623e-05	0
LYa_b1_contig_196467 (1..957) consensus	205.025	0.00123961	0.0542606	1
LYa_b1_contig_280939 (646..1094) consensus	204.918	0.00196576	0.0741235	1
LYa_b1_contig_190587 (136..860) consensus	201.78	0.00202969	0.0758416	1
LYa_b1_contig_449833 (63..383) consensus	201.229	0.00204424	0.0761827	1
LYa_b1_contig_377399 (33..373) consensus	201.229	0.002044	0.0761827	1
LYa_b1_contig_131352 (27..537) consensus	198.595	0.00131682	0.056444	1
LYa_b1_contig_89979 (3227..4100) consensus	197.061	0.00133552	0.057002	1
LYa_b1_contig_381560 (50..918) consensus	196.981	0.00134997	0.0573543	1
LYa_b1_contig_71933 (117..797) consensus	196.777	0.00120137	0.0531839	1
LYa_b1_contig_350410 (29..442) consensus	195.505	0.0022921	0.0820658	1
LYa_b1_contig_4262 (1..296) consensus	195.184	0.00222693	0.0805955	1
LYa_b1_contig_297838 (102..522) consensus	194.044	0.00142269	0.0592459	1
LYa_b1_contig_109843 (606..903) consensus	192.762	0.00138832	0.058264	1
LYa_b1_contig_451679 (286..780) consensus	191.988	0.00241649	0.084368	1
LYa_b1_contig_296812 (19..900) consensus	188.994	8.39671e-08	4.28802e-05	0
LYa_b1_contig_430132 (1..425) consensus	188.908	0.00248759	0.0860024	1
LYa_b1_contig_39271 (1..1183) consensus	188.48	0.00192229	0.0730333	1
LYa_b1_contig_23136 (2399..4227) consensus	186.569	0.0023571	0.0832373	1
LYa_b1_contig_87686 (130..641) consensus	185.229	0.00179445	0.0694161	1
LYa_b1_contig_24621 (78..2736) consensus	184.676	0.00180107	0.0695573	1
LYa_b1_contig_72595 (1..248) consensus	184.089	0.00238387	0.0837286	1
LYa_b1_contig_24034 (1..1093) consensus	183.06	0.00171298	0.0673783	1
LYa_b1_contig_10202 (3..375) consensus	182.747	0.00264211	0.0896188	1
LYa_b1_contig_360450 (360..1484) consensus	182.747	0.00264219	0.0896188	1
LYa_b1_contig_65119 (72..1298) consensus	173.666	0.00158111	0.0639836	1
LYa_b1_contig_77352 (50..533) consensus	173.543	0.00306268	0.0978854	1
LYa_b1_contig_296458 (1..863) consensus	173.506	0.00307143	0.0979753	1
LYa_b1_contig_37020 (8..1945) consensus	170.877	0.00166962	0.0663791	1
LYa_b1_contig_349564 (1224..2623) consensus	170.233	0.00205878	0.0766027	1
LYa_b1_contig_94846 (1..337) consensus	170.204	0.00198877	0.0747103	1
LYa_b1_contig_85517 (18..559) consensus	167.559	0.0029371	0.0956036	1
LYa_b1_contig_2570 (234..1155) consensus	165.319	9.15134e-08	4.55691e-05	0
LYa_b1_contig_91720 (227..831) consensus	164.845	0.00216306	0.0794199	1
LYa_b1_contig_111899 (1..206) consensus	164.265	0.00338089	0.103669	1
LYa_b1_contig_239076 (29..391) consensus	164.265	0.00338203	0.103669	1
LYa_b1_contig_350219 (1..614) consensus	164.265	0.00338231	0.103669	1
LYa_b1_contig_296266 (94..1250) consensus	164.265	0.00338183	0.103669	1
LYa_b1_contig_12612 (542..1033) consensus	164.175	0.00210154	0.0778018	1
LYa_b1_contig_50545 (3..778) consensus	164.09	0.00334315	0.103131	1
LYa_b1_contig_336946 (25..972) consensus	163.922	0.00298826	0.096524	1
LYa_b1_contig_11532 (43..336) consensus	163.755	3.73544e-10	5.56909e-07	0
LYa_b1_contig_127732 (338..845) consensus	162.891	0.00217525	0.0795469	1
LYa_b1_contig_42967 (1..207) consensus	161.553	0.00335275	0.103289	1
LYa_b1_contig_299248 (1..326) consensus	161.28	0.00350033	0.105575	1
LYa_b1_contig_457665 (82..338) consensus	160.993	0.00363116	0.108029	1
LYa_b1_contig_44515 (1..472) consensus	160.993	0.00362872	0.108002	1
LYa_b1_contig_453814 (724..1350) consensus	158.743	0.00345226	0.104839	1
LYa_b1_contig_41188 (5..295) consensus	157.856	0.00384251	0.11218	1
LYa_b1_contig_259833 (15..333) consensus	157.856	0.00384259	0.11218	1
LYa_b1_contig_381916 (218..441) consensus	157.84	0.00364389	0.108299	1
LYa_b1_contig_51610 (10..979) consensus	155.335	0.00227154	0.081518	1
LYa_b1_contig_141864 (614..2108) consensus	155.129	0.00236158	0.0832373	1
LYa_b1_contig_356006 (217..538) consensus	153.983	0.00270645	0.0908764	1
LYa_b1_contig_293697 (188..2422) consensus	153.977	6.33582e-07	0.000219135	0
LYa_b1_contig_26758 (1..557) consensus	153.008	0.0032135	0.100661	1
LYa_b1_contig_103009 (301..1268) consensus	152.282	3.41974e-09	3.15926e-06	0
LYa_b1_contig_13458 (1..734) consensus	152.106	1.11723e-11	3.13768e-08	0
LYa_b1_contig_317496 (267..1632) consensus	151.943	0.00419108	0.118177	1
LYa_b1_contig_52882 (3036..3689) consensus	151.529	0.00403396	0.115556	1
LYa_b1_contig_218487 (1..750) consensus	151.32	0.00351328	0.105776	1
LYa_b1_contig_160291 (106..1068) consensus	151.129	0.00316181	0.0996383	1
LYa_b1_contig_21922 (1..625) consensus	150.04	0.00408133	0.116202	1
LYa_b1_contig_349703 (253..1286) consensus	147.808	0.00309581	0.0983084	1
LYa_b1_contig_107497 (339..693) consensus	145.783	0.00460286	0.125455	1
LYa_b1_contig_8018 (1..1498) consensus	144.749	0.00427156	0.119103	1
LYa_b1_contig_145515 (239..970) consensus	144.173	0.00289809	0.0949501	1
LYa_b1_contig_89979 (4201..4943) consensus	143.514	0.00288225	0.0947369	1
LYa_b1_contig_33301 (39..442) consensus	142.702	0.00477875	0.128257	1
LYa_b1_contig_84911 (2563..3109) consensus	142.438	0.00458304	0.125012	1
LYa_b1_contig_253985 (3..336) consensus	141.848	0.00465609	0.126268	1
LYa_b1_contig_382937 (50..527) consensus	141.61	0.00473334	0.127541	1
LYa_b1_contig_423282 (304..1028) consensus	141.61	0.00473391	0.127541	1
LYa_b1_contig_168526 (706..1155) consensus	141.424	0.00320365	0.100461	1
LYa_b1_contig_7095 (1..1884) consensus	140.909	5.48793e-11	1.07031e-07	0
LYa_b1_contig_17661 (1..621) consensus	139.52	0.00332848	0.102957	1
LYa_b1_contig_139854 (6..677) consensus	135.99	0.00524464	0.135629	1
LYa_b1_contig_329035 (1..263) consensus	135.894	0.00511629	0.133528	1
LYa_b1_contig_290199 (110..600) consensus	135.894	0.00511591	0.133528	1
LYa_b1_contig_171910 (52..682) consensus	135.894	0.00511544	0.133528	1
LYa_b1_contig_46424 (99..3915) consensus	134.263	1.6009e-08	1.13536e-05	0
LYa_b1_contig_352333 (1..322) consensus	134.185	0.00336417	0.103461	1
LYa_b1_contig_56635 (1..2824) consensus	133.906	9.09751e-20	3.19373e-15	0
LYa_b1_contig_248704 (490..2092) consensus	133.507	0.00329515	0.102325	1
LYa_b1_contig_317496 (1679..3715) consensus	133.461	0.00529041	0.13631	1
LYa_b1_contig_21349 (1..805) consensus	132.205	0.00296109	0.0959989	1
LYa_b1_contig_44757 (1..444) consensus	131.492	3.33306e-06	0.000757338	1
LYa_b1_contig_148688 (54..909) consensus	131.174	3.10269e-11	8.06826e-08	0
LYa_b1_contig_150508 (1..665) consensus	131.102	0.00366991	0.108693	1
LYa_b1_contig_131597 (96..340) consensus	129.619	0.00540083	0.138133	1
LYa_b1_contig_153469 (232..1355) consensus	128.978	0.00504469	0.132402	1
LYa_b1_contig_3109 (864..2212) consensus	127.56	0.00568384	0.142085	1
LYa_b1_contig_457920 (54..453) consensus	126.481	0.00557675	0.141062	1
LYa_b1_contig_457857 (110..579) consensus	126.481	0.00557585	0.141062	1
LYa_b1_contig_168684 (2368..4513) consensus	126.481	0.00557538	0.141062	1
LYa_b1_contig_56573 (1027..1890) consensus	125.776	0.00447153	0.122829	1
LYa_b1_contig_6220 (8..1981) consensus	125.511	0.00436192	0.120763	1
LYa_b1_contig_24153 (46..722) consensus	123.058	0.00394398	0.114002	1
LYa_b1_contig_123394 (310..1014) consensus	122.213	0.00575476	0.14333	1
LYa_b1_contig_413519 (2228..2701) consensus	121.722	0.00388772	0.112982	1
LYa_b1_contig_44683 (514..2347) consensus	121.315	1.68467e-06	0.000440526	0
LYa_b1_contig_154791 (931..1163) consensus	121.14	0.00598582	0.146589	1
LYa_b1_contig_422466 (384..876) consensus	121.14	0.00598411	0.146589	1
LYa_b1_contig_103779 (76..536) consensus	120.724	0.00442339	0.121936	1
LYa_b1_contig_115323 (1..220) consensus	120.206	0.00610417	0.148264	1
LYa_b1_contig_173314 (123..637) consensus	119.401	7.73752e-08	4.05417e-05	0
LYa_b1_contig_36606 (17..559) consensus	118.909	0.00404948	0.115798	1
LYa_b1_contig_17149 (23..296) consensus	118.722	0.00367961	0.108916	1
LYa_b1_contig_11335 (219..747) consensus	118.059	0.00637701	0.15237	1
LYa_b1_contig_451849 (70..672) consensus	118.059	0.00637574	0.15237	1
LYa_b1_contig_157363 (5..448) consensus	117.649	0.00355098	0.106546	1
LYa_b1_contig_382207 (1..545) consensus	117.568	0.00420862	0.118402	1
LYa_b1_contig_21073 (45..559) consensus	117.069	0.00647532	0.153429	1
LYa_b1_contig_106197 (839..3076) consensus	117.069	0.006474	0.153429	1
LYa_b1_contig_9203 (65..939) consensus	116.978	0.00579791	0.143876	1
LYa_b1_contig_45524 (1614..2410) consensus	116.913	0.00565457	0.141669	1
LYa_b1_contig_13459 (1..1130) consensus	116.254	7.20656e-09	5.74977e-06	0
LYa_b1_contig_298151 (14..574) consensus	116.097	0.0042516	0.118889	1
LYa_b1_contig_381916 (1..215) consensus	114.979	0.00677142	0.157374	1
LYa_b1_contig_349606 (2..736) consensus	114.979	0.00677098	0.157374	1
LYa_b1_contig_384229 (360..861) consensus	113.859	0.00488591	0.130138	1
LYa_b1_contig_16569 (85..609) consensus	113.68	0.00471555	0.12734	1
LYa_b1_contig_76528 (125..566) consensus	113.127	0.00461337	0.125595	1
LYa_b1_contig_298894 (50..811) consensus	112.213	0.00461083	0.125574	1
LYa_b1_contig_57520 (62..1043) consensus	112.085	0.00430541	0.119576	1
LYa_b1_contig_451682 (63..457) consensus	111.899	0.00728244	0.164202	1
LYa_b1_contig_42717 (471..2445) consensus	111.899	0.00728267	0.164202	1
LYa_b1_contig_56820 (208..1186) consensus	111.687	0.00553659	0.14064	1
LYa_b1_contig_19913 (2299..3126) consensus	111.357	0.00636353	0.152297	1
LYa_b1_contig_296363 (65..463) consensus	111.328	1.1741e-06	0.000342053	0
LYa_b1_contig_33457 (1..232) consensus	111.108	0.00644375	0.152897	1
LYa_b1_contig_410819 (2..387) consensus	110.794	0.00719206	0.163049	1
LYa_b1_contig_455085 (657..1041) consensus	110.7	0.00706975	0.161239	1
LYa_b1_contig_2545 (1..445) consensus	110.206	4.85517e-07	0.000175715	0
LYa_b1_contig_68430 (17..859) consensus	109.004	0.00476039	0.12796	1
LYa_b1_contig_412551 (253..868) consensus	108.818	0.00765903	0.169015	1
LYa_b1_contig_132703 (1703..2473) consensus	108.385	0.00502189	0.132007	1
LYa_b1_contig_309285 (74..1168) consensus	107.657	0.00772442	0.169956	1
LYa_b1_contig_52882 (2215..2763) consensus	107.337	0.00737213	0.165287	1
LYa_b1_contig_332686 (6..491) consensus	107.1	1.27998e-05	0.00205179	1
LYa_b1_contig_252702 (60..600) consensus	105.738	0.00795173	0.172413	1
LYa_b1_contig_347707 (1..564) consensus	105.738	0.00795034	0.172413	1
LYa_b1_contig_101502 (74..3463) consensus	104.813	0.00479399	0.128568	1
LYa_b1_contig_79560 (25..331) consensus	104.519	0.0081284	0.174488	1
LYa_b1_contig_82000 (4..473) consensus	104.519	0.00812762	0.174488	1
LYa_b1_contig_32970 (1142..1636) consensus	104.519	0.00812692	0.174488	1
LYa_b1_contig_94914 (1..1156) consensus	104.519	0.00812907	0.174488	1
LYa_b1_contig_90311 (1..331) consensus	104.044	0.00533752	0.137121	1
LYa_b1_contig_144768 (15..1440) consensus	103.82	4.55739e-06	0.000960897	1
LYa_b1_contig_15412 (732..1482) consensus	103.806	4.97834e-07	0.000179248	0
LYa_b1_contig_349565 (1..876) consensus	103.482	0.00557181	0.141062	1
LYa_b1_contig_451534 (1..204) consensus	103.314	0.00561225	0.141286	1
LYa_b1_contig_110380 (82..1623) consensus	103.159	0.00554505	0.140753	1
LYa_b1_contig_218880 (210..602) consensus	102.658	0.00809514	0.174245	1
LYa_b1_contig_82682 (4..552) consensus	102.658	0.0080954	0.174245	1
LYa_b1_contig_415105 (68..803) consensus	102.394	0.00776255	0.170371	1
LYa_b1_contig_455064 (1..240) consensus	102.271	0.00818298	0.175116	1
LYa_b1_contig_68768 (155..2225) consensus	102.091	3.78401e-07	0.000144391	0
LYa_b1_contig_88395 (254..586) consensus	101.481	0.00498361	0.131198	1
LYa_b1_contig_451576 (213..671) consensus	101.382	0.00852301	0.179756	1
LYa_b1_contig_87687 (259..876) consensus	101.247	1.88332e-06	0.000484357	0
LYa_b1_contig_297837 (217..471) consensus	101.231	0.00562437	0.141372	1
LYa_b1_contig_351405 (35..264) consensus	101.01	0.00772552	0.169956	1
LYa_b1_contig_1412 (53..317) consensus	100.587	1.42168e-08	1.02905e-05	0
LYa_b1_contig_89927 (133..1354) consensus	100.281	0.00626649	0.150734	1
LYa_b1_contig_296267 (1..1900) consensus	99.9997	2.0411e-05	0.00293663	1
LYa_b1_contig_68055 (1..517) consensus	99.8095	0.00583779	0.144272	1
LYa_b1_contig_98763 (154..1355) consensus	99.5773	0.00855826	0.180067	1
LYa_b1_contig_453814 (185..709) consensus	99.4605	0.00880357	0.183578	1
LYa_b1_contig_102192 (108..1505) consensus	98.5002	5.52972e-15	4.10725e-11	0
LYa_b1_contig_412530 (20..500) consensus	98.2443	0.0089055	0	1
LYa_b1_contig_132066 (1..1143) consensus	98.2443	0.00891962	0	1
LYa_b1_contig_160381 (2..232) consensus	98.081	0.00598167	0.146589	1
LYa_b1_contig_4503 (38..330) consensus	97.7355	0.00747409	0.166697	1
LYa_b1_contig_438380 (595..1122) consensus	97.3484	0.00608489	0.148061	1
LYa_b1_contig_33301 (1565..1883) consensus	96.4969	0.00907494	0.187125	1
LYa_b1_contig_350337 (69..574) consensus	96.4969	0.00907763	0.187126	1
LYa_b1_contig_249023 (210..912) consensus	96.0049	0.00674089	0.157097	1
LYa_b1_contig_78454 (326..1377) consensus	95.8678	2.95702e-06	0.000696695	1
LYa_b1_contig_35484 (1..319) consensus	95.6927	1.72215e-05	0.00255632	1
LYa_b1_contig_295473 (503..946) consensus	95.1504	0.00773044	0.169985	1
LYa_b1_contig_346511 (1..233) consensus	95.1069	0.00930625	0	1
LYa_b1_contig_274868 (664..906) consensus	95.1069	0.00930799	0	1
LYa_b1_contig_187957 (316..634) consensus	95.1069	0.00931109	0	1
LYa_b1_contig_236009 (58..1393) consensus	95.1069	0.00931454	0	1
LYa_b1_contig_36097 (1..354) consensus	94.9782	0.00589747	0.145185	1
LYa_b1_contig_299117 (533..851) consensus	94.9509	0.00799176	0	1
LYa_b1_contig_297837 (505..1372) consensus	94.5362	0.00642921	0.152746	1
LYa_b1_contig_7992 (170..802) consensus	94.2402	0.00636424	0.152297	1
LYa_b1_contig_7783 (1..584) consensus	94.2236	1.15801e-06	0.000340189	0
LYa_b1_contig_83693 (1..584) consensus	94.1449	1.05661e-11	3.09106e-08	0
LYa_b1_contig_412352 (88..1219) consensus	93.8406	0.00959154	0.193788	1
LYa_b1_contig_112491 (364..2111) consensus	93.8406	0.00959371	0.193788	1
LYa_b1_contig_58933 (529..1403) consensus	93.6444	0.00702975	0.160928	1
LYa_b1_contig_97710 (1..258) consensus	93.4166	0.00961237	0	1
LYa_b1_contig_200884 (1..404) consensus	93.4166	0.00961668	0	1
LYa_b1_contig_172183 (1..506) consensus	93.4166	0.00962133	0	1
LYa_b1_contig_349985 (1..871) consensus	93.4166	0.00961421	0	1
LYa_b1_contig_108904 (1055..2290) consensus	93.4166	0.009625	0	1
LYa_b1_contig_296447 (1..280) consensus	93.3281	1.05266e-09	1.21161e-06	0
LYa_b1_contig_84911 (1267..1645) consensus	93.1537	0.00915384	0	1
LYa_b1_contig_457678 (108..608) consensus	91.9695	0.0101706	0	1
LYa_b1_contig_186082 (1..243) consensus	91.7122	3.79874e-06	0.00084671	1
LYa_b1_contig_285627 (262..1035) consensus	91.7078	0.00806114	0	1
LYa_b1_contig_351663 (10..295) consensus	91.3105	0.00606995	0	1
LYa_b1_contig_132703 (1118..1622) consensus	91.2462	0.00675759	0	1
LYa_b1_contig_260580 (22..719) consensus	91.1882	0.00693563	0	1
LYa_b1_contig_165818 (642..1155) consensus	91.1581	0.00712289	0	1
LYa_b1_contig_44638 (1..639) consensus	91.1032	0.00693364	0	1
LYa_b1_contig_7794 (1566..3035) consensus	90.9933	4.57798e-06	0.000962349	1
LYa_b1_contig_5722 (129..361) consensus	90.9358	0.00687111	0	1
LYa_b1_contig_429907 (125..792) consensus	90.3362	0.0106948	0	1
LYa_b1_contig_172830 (8..1043) consensus	90.3362	0.010704	0	1
LYa_b1_contig_194764 (1..1049) consensus	90.1171	0.00608742	0	1
LYa_b1_contig_429855 (1..394) consensus	90.0735	0.0101621	0	1
LYa_b1_contig_16380 (1..517) consensus	89.9578	0.00771795	0	1
LYa_b1_contig_239073 (1..290) consensus	89.8438	0.00792972	0	1
LYa_b1_contig_70331 (1..432) consensus	89.6433	0.00700253	0	1
LYa_b1_contig_47066 (1..333) consensus	89.5471	0.00933475	0	1
LYa_b1_contig_146580 (1..1019) consensus	88.9116	0.00716426	0	1
LYa_b1_contig_382247 (1..253) consensus	88.8321	0.0110548	0	1
LYa_b1_contig_96410 (51..333) consensus	88.8321	0.011054	0	1
LYa_b1_contig_27167 (29..710) consensus	88.8321	0.0110539	0	1
LYa_b1_contig_137661 (537..1222) consensus	88.3375	0.00701035	0	1
LYa_b1_contig_318115 (1..291) consensus	88.2206	0.0106891	0	1
LYa_b1_contig_14436 (78..750) consensus	88.0214	0.00745674	0	1
LYa_b1_contig_95322 (1..1877) consensus	87.0329	0.00839997	0	1
LYa_b1_contig_47360 (1..352) consensus	86.5849	4.85085e-06	0.000998777	1
LYa_b1_contig_24151 (10..472) consensus	86.2954	0.00730506	0	1
LYa_b1_contig_104413 (1..472) consensus	85.6946	0.0119242	0	1
LYa_b1_contig_349917 (67..864) consensus	85.6946	0.0119243	0	1
LYa_b1_contig_76999 (1..615) consensus	85.6244	5.98933e-07	0.000209212	0
LYa_b1_contig_16049 (12..332) consensus	85.591	0.0105766	0	1
LYa_b1_contig_310102 (142..1130) consensus	85.4106	0.0113805	0	1
LYa_b1_contig_295936 (70..841) consensus	85.254	0.00776659	0	1
LYa_b1_contig_370974 (307..716) consensus	84.1756	0.0121632	0	1
LYa_b1_contig_344691 (189..786) consensus	84.1756	0.0121646	0	1
LYa_b1_contig_124073 (464..1921) consensus	84.1756	0.0121652	0	1
LYa_b1_contig_296072 (1..318) consensus	84.0173	0.0080748	0	1
LYa_b1_contig_315638 (1..1103) consensus	83.7888	1.64689e-06	0.000436229	0
LYa_b1_contig_22633 (43..1628) consensus	83.0276	3.60182e-08	2.18006e-05	0
LYa_b1_contig_216431 (1..311) consensus	82.9921	0.00819743	0	1
LYa_b1_contig_455085 (143..506) consensus	82.6006	0.0123455	0	1
LYa_b1_contig_5050 (1..244) consensus	82.5572	0.0127911	0	1
LYa_b1_contig_457673 (141..481) consensus	82.5572	0.0127854	0	1
LYa_b1_contig_20300 (72..3589) consensus	82.2697	2.77715e-07	0.000113364	0
LYa_b1_contig_47345 (379..1560) consensus	81.5479	0.0103106	0	1
LYa_b1_contig_83487 (1..378) consensus	81.1915	0.00914123	0	1
LYa_b1_contig_352026 (132..441) consensus	81.0952	0.0127268	0	1
LYa_b1_contig_230753 (1482..2410) consensus	81.0952	0.012721	0	1
LYa_b1_contig_36795 (43..1131) consensus	81.0952	0.012717	0	1
LYa_b1_contig_149978 (1094..1431) consensus	80.6022	0.0107732	0	1
LYa_b1_contig_268493 (195..513) consensus	79.7906	0.0129094	0	1
LYa_b1_contig_84949 (1..1035) consensus	79.7906	0.0129058	0	1
LYa_b1_contig_223407 (373..702) consensus	79.4198	0.0131607	0	1
LYa_b1_contig_263199 (81..449) consensus	79.4198	0.0131547	0	1
LYa_b1_contig_89397 (60..291) consensus	78.7193	0.00905511	0	1
LYa_b1_contig_48078 (1..476) consensus	78.6058	0.00918893	0	1
LYa_b1_contig_935 (38..626) consensus	78.4084	4.18872e-06	0.000904906	1
LYa_b1_contig_100026 (31..288) consensus	78.3905	0.00914109	0	1
LYa_b1_contig_204968 (1..237) consensus	78.0757	0.0125771	0	1
LYa_b1_contig_435824 (616..1001) consensus	78.0149	0.0134459	0	1
LYa_b1_contig_34229 (369..897) consensus	78.0149	0.0134479	0	1
LYa_b1_contig_36795 (1181..2717) consensus	78.0149	0.0134476	0	1
LYa_b1_contig_422243 (1..937) consensus	77.9158	9.4298e-06	0.00165934	1
LYa_b1_contig_3539 (1..670) consensus	77.6408	0.00885597	0	1
LYa_b1_contig_138688 (2201..3221) consensus	77.49	0.012144	0	1
LYa_b1_contig_60887 (292..771) consensus	77.1832	0.0101688	0	1
LYa_b1_contig_33726 (1..812) consensus	76.9806	0.0138293	0	1
LYa_b1_contig_20501 (1..366) consensus	76.8918	5.22645e-05	0.00603543	1
LYa_b1_contig_7428 (46..637) consensus	75.581	0.00992738	0	1
LYa_b1_contig_44392 (3..361) consensus	75.4024	0.00863729	0	1
LYa_b1_contig_17738 (220..545) consensus	75.3516	0.0106118	0	1
LYa_b1_contig_19132 (268..525) consensus	75.0377	0.0118514	0	1
LYa_b1_contig_117540 (623..920) consensus	74.9345	0.0149065	0	1
LYa_b1_contig_110516 (1..236) consensus	74.4814	9.07335e-05	0.00887638	1
LYa_b1_contig_144363 (1..323) consensus	74.1706	0.0144558	0	1
LYa_b1_contig_24222 (1..479) consensus	74.1706	0.0144607	0	1
LYa_b1_contig_241061 (1217..1792) consensus	74.1706	0.0144645	0	1
LYa_b1_contig_399518 (1..831) consensus	74.1706	0.0144655	0	1
LYa_b1_contig_295998 (2393..3224) consensus	73.8803	7.1746e-08	3.81618e-05	0
LYa_b1_contig_9812 (7..723) consensus	73.499	0.000101637	0.00956573	1
LYa_b1_contig_457769 (16..231) consensus	73.145	0.0159562	0	1
LYa_b1_contig_350308 (1377..1769) consensus	73.145	0.0159571	0	1
LYa_b1_contig_98792 (85..1429) consensus	73.0628	0.00955707	0	1
LYa_b1_contig_159360 (1..270) consensus	73.0178	1.06191e-05	0.00181406	1
LYa_b1_contig_146676 (384..648) consensus	72.9891	0.0132767	0	1
LYa_b1_contig_151978 (56..1783) consensus	72.9589	7.1118e-08	3.81165e-05	0
LYa_b1_contig_79831 (1..252) consensus	72.721	0.0112308	0	1
LYa_b1_contig_5907 (262..1038) consensus	72.5637	0.0109916	0	1
LYa_b1_contig_423720 (86..555) consensus	72.5552	0.0108753	0	1
LYa_b1_contig_353278 (22..551) consensus	72.3786	0.0094002	0	1
LYa_b1_contig_124719 (3..2631) consensus	72.3574	8.97766e-07	0.000284391	0
LYa_b1_contig_55244 (57..3552) consensus	72.0423	4.04529e-10	5.56909e-07	0
LYa_b1_contig_382463 (122..406) consensus	71.8542	0.0163815	0	1
LYa_b1_contig_382133 (404..753) consensus	71.8542	0.0163815	0	1
LYa_b1_contig_126727 (558..1075) consensus	71.8542	0.0163857	0	1
LYa_b1_contig_129888 (1191..1800) consensus	71.8542	0.0163847	0	1
LYa_b1_contig_228353 (13..1553) consensus	71.8357	8.8878e-07	0.000283646	0
LYa_b1_contig_438851 (1..367) consensus	71.6871	0.0103214	0	1
LYa_b1_contig_111838 (3..369) consensus	71.4399	0.0100726	0	1
LYa_b1_contig_19262 (31..525) consensus	71.3796	1.18205e-05	0.00192559	1
LYa_b1_contig_122341 (38..420) consensus	71.3605	0.0154527	0	1
LYa_b1_contig_22135 (1..427) consensus	71.3605	0.0154531	0	1
LYa_b1_contig_144636 (1..850) consensus	71.3299	0.0146299	0	1
LYa_b1_contig_29751 (40..441) consensus	71.235	0.0110651	0	1
LYa_b1_contig_15031 (1..638) consensus	71.0721	5.66378e-07	0.000200838	0
LYa_b1_contig_43630 (254..487) consensus	70.9987	8.06334e-05	0.00813567	1
LYa_b1_contig_239073 (579..1153) consensus	70.9682	0.0112418	0	1
LYa_b1_contig_192356 (1..527) consensus	70.866	5.40213e-06	0.00107447	1
LYa_b1_contig_58680 (25..282) consensus	70.8158	0.0109272	0	1
LYa_b1_contig_164295 (104..1184) consensus	70.8107	4.0009e-08	2.36056e-05	0
LYa_b1_contig_90098 (18..471) consensus	70.4546	0.0109482	0	1
LYa_b1_contig_42440 (1..643) consensus	70.0536	0.0103001	0	1
LYa_b1_contig_76101 (1..214) consensus	70.0076	0.016999	0	1
LYa_b1_contig_315609 (16..268) consensus	70.0076	0.017001	0	1
LYa_b1_contig_447996 (332..680) consensus	70.0076	0.0170132	0	1
LYa_b1_contig_99618 (9..640) consensus	70.0076	0.0169967	0	1
LYa_b1_contig_312814 (1..406) consensus	69.3608	0.0117302	0	1
LYa_b1_contig_350484 (1..306) consensus	68.9285	0.011466	0	1
LYa_b1_contig_451951 (495..829) consensus	68.7739	0.0174223	0	1
LYa_b1_contig_451593 (724..1074) consensus	68.7739	0.0174166	0	1
LYa_b1_contig_87871 (7..248) consensus	68.5505	0.0169275	0	1
LYa_b1_contig_349397 (1..447) consensus	68.5505	0.0169273	0	1
LYa_b1_contig_298684 (312..886) consensus	68.5505	0.0169337	0	1
LYa_b1_contig_194793 (12..1278) consensus	68.536	4.67672e-06	0.000977254	1
LYa_b1_contig_440579 (57..708) consensus	68.512	0.0163617	0	1
LYa_b1_contig_7642 (1..473) consensus	68.4922	0.000101032	0.00952153	1
LYa_b1_contig_15919 (117..3130) consensus	68.4791	4.61018e-09	3.94738e-06	0
LYa_b1_contig_37383 (3..319) consensus	67.7744	0.0129089	0	1
LYa_b1_contig_170365 (1..604) consensus	67.747	1.47806e-05	0.00230101	1
LYa_b1_contig_57400 (99..645) consensus	67.6604	0.0106707	0	1
LYa_b1_contig_36388 (1..353) consensus	67.5801	0.01238	0	1
LYa_b1_contig_30181 (991..4271) consensus	67.4766	2.42707e-06	0.000593753	0
LYa_b1_contig_320754 (18..791) consensus	67.454	0.0127154	0	1
LYa_b1_contig_158891 (14..713) consensus	67.2419	0.00015364	0.0129496	1
LYa_b1_contig_260580 (760..1253) consensus	67.1978	0.013449	0	1
LYa_b1_contig_191387 (836..1331) consensus	67.0861	0.0137509	0	1
LYa_b1_contig_146043 (1..423) consensus	67.0419	0.014269	0	1
LYa_b1_contig_82470 (2..216) consensus	66.8702	0.0178883	0	1
LYa_b1_contig_349824 (26..479) consensus	66.8702	0.0178885	0	1
LYa_b1_contig_102145 (107..563) consensus	66.8702	0.0178831	0	1
LYa_b1_contig_76930 (22..486) consensus	66.8702	0.0178791	0	1
LYa_b1_contig_114404 (1..306) consensus	66.828	1.87426e-06	0.000483799	0
LYa_b1_contig_69245 (26..1596) consensus	66.7189	1.60325e-05	0.00244178	1
LYa_b1_contig_38518 (11..1059) consensus	66.4456	0.0127255	0	1
LYa_b1_contig_42597 (6..257) consensus	66.1655	0.0127595	0	1
LYa_b1_contig_198619 (298..1088) consensus	66.1401	0.0127638	0	1
LYa_b1_contig_137164 (15..433) consensus	65.7405	0.0187104	0	1
LYa_b1_contig_41567 (368..963) consensus	65.7405	0.0187097	0	1
LYa_b1_contig_33832 (979..1829) consensus	65.7405	0.0187062	0	1
LYa_b1_contig_297377 (1..296) consensus	65.6091	0.0128568	0	1
LYa_b1_contig_286204 (1393..1935) consensus	65.6091	0.0128589	0	1
LYa_b1_contig_412458 (517..1087) consensus	64.6449	0.0150145	0	1
LYa_b1_contig_340216 (1..2908) consensus	64.6446	1.50468e-05	0.00232698	1
LYa_b1_contig_22417 (4..492) consensus	64.6383	0.0136701	0	1
LYa_b1_contig_298436 (73..1034) consensus	64.5424	0.0140481	0	1
LYa_b1_contig_43927 (1586..2930) consensus	64.3818	0.0145685	0	1
LYa_b1_contig_85566 (55..342) consensus	63.8903	0.0124075	0	1
LYa_b1_contig_52660 (1..225) consensus	63.7328	0.0194928	0	1
LYa_b1_contig_214655 (253..517) consensus	63.7328	0.0194977	0	1
LYa_b1_contig_381668 (132..436) consensus	63.7328	0.0194947	0	1
LYa_b1_contig_32539 (1..359) consensus	63.7328	0.0194883	0	1
LYa_b1_contig_111826 (177..570) consensus	63.7328	0.0194866	0	1
LYa_b1_contig_359059 (28..438) consensus	63.7328	0.0194889	0	1
LYa_b1_contig_255186 (697..1274) consensus	63.7328	0.0194768	0	1
LYa_b1_contig_350853 (190..782) consensus	63.7328	0.0194842	0	1
LYa_b1_contig_247256 (78..1033) consensus	63.7328	0.0194796	0	1
LYa_b1_contig_297538 (1..227) consensus	63.6294	0.0169944	0	1
LYa_b1_contig_246059 (129..377) consensus	63.5574	0.0119457	0	1
LYa_b1_contig_246273 (1..356) consensus	63.5574	0.0119459	0	1
LYa_b1_contig_28462 (30..350) consensus	63.3078	0.0138425	0	1
LYa_b1_contig_195251 (1..375) consensus	63.2526	0.0137168	0	1
LYa_b1_contig_209066 (159..872) consensus	63.2526	0.0137156	0	1
LYa_b1_contig_72116 (22..637) consensus	62.9304	0.0198547	0	1
LYa_b1_contig_189904 (690..1400) consensus	62.9304	0.0198558	0	1
LYa_b1_contig_117689 (1..1858) consensus	62.9304	0.0198589	0	1
LYa_b1_contig_28076 (482..838) consensus	62.9111	0.0149854	0	1
LYa_b1_contig_31511 (7..411) consensus	62.7934	0.0163549	0	1
LYa_b1_contig_234258 (113..387) consensus	62.6132	0.0200329	0	1
LYa_b1_contig_58743 (34..669) consensus	62.6132	0.0200348	0	1
LYa_b1_contig_437722 (12..1460) consensus	62.6132	0.0200207	0	1
LYa_b1_contig_455077 (174..517) consensus	62.4604	0.0160028	0	1
LYa_b1_contig_94512 (61..757) consensus	62.4382	8.96421e-05	0.00881494	1
LYa_b1_contig_349868 (4..766) consensus	62.1414	0.015521	0	1
LYa_b1_contig_152232 (340..1476) consensus	62.1414	0.0155211	0	1
LYa_b1_contig_335210 (74..428) consensus	62.0661	0.0146097	0	1
LYa_b1_contig_296768 (10..336) consensus	61.957	1.37289e-09	1.48295e-06	0
LYa_b1_contig_163797 (18..342) consensus	61.4632	0.015279	0	1
LYa_b1_contig_36791 (29..981) consensus	61.4426	0.0125705	0	1
LYa_b1_contig_353927 (1..581) consensus	61.3617	0.0149171	0	1
LYa_b1_contig_53715 (1..663) consensus	61.2292	0.000180538	0.0144536	1
LYa_b1_contig_411328 (41..509) consensus	60.9074	0.000226212	0.017078	1
LYa_b1_contig_267279 (1..232) consensus	60.5954	0.0217679	0	1
LYa_b1_contig_152959 (5..252) consensus	60.5954	0.0217635	0	1
LYa_b1_contig_80981 (72..645) consensus	60.5954	0.021766	0	1
LYa_b1_contig_217595 (228..2545) consensus	60.5954	0.0217589	0	1
LYa_b1_contig_8555 (1..1238) consensus	60.5914	1.56302e-06	0.000420464	0
LYa_b1_contig_75108 (1..1012) consensus	60.5628	4.03776e-05	0.00499991	1
LYa_b1_contig_13885 (309..825) consensus	60.2264	0.0188492	0	1
LYa_b1_contig_12034 (6..1532) consensus	60.1204	0.0206572	0	1
LYa_b1_contig_21907 (1613..4726) consensus	59.898	4.40475e-06	0.000942871	1
LYa_b1_contig_298738 (176..1107) consensus	59.888	0.016021	0	1
LYa_b1_contig_272977 (42..513) consensus	59.7168	0.0151029	0	1
LYa_b1_contig_129093 (7..349) consensus	59.7127	0.0180967	0	1
LYa_b1_contig_58318 (11..903) consensus	59.6533	0.019191	0	1
LYa_b1_contig_439691 (232..511) consensus	59.5329	0.0224037	0	1
LYa_b1_contig_50355 (117..445) consensus	59.5329	0.022404	0	1
LYa_b1_contig_230753 (723..1443) consensus	59.5329	0.0223994	0	1
LYa_b1_contig_90427 (575..1680) consensus	59.2717	0.0208749	0	1
LYa_b1_contig_115441 (1..549) consensus	59.2424	0.0151305	0	1
LYa_b1_contig_154616 (1..562) consensus	59.0091	0.000222842	0.0168963	1
LYa_b1_contig_121186 (1185..1629) consensus	58.9185	0.0161092	0	1
LYa_b1_contig_147910 (3..359) consensus	58.7481	0.0187972	0	1
LYa_b1_contig_4551 (1..641) consensus	58.7205	0.0147813	0	1
LYa_b1_contig_56220 (1..682) consensus	58.7205	0.0147808	0	1
LYa_b1_contig_138889 (269..1368) consensus	58.6861	0.0167662	0	1
LYa_b1_contig_297204 (1..403) consensus	58.2891	9.67747e-08	4.71361e-05	0
LYa_b1_contig_399474 (1..240) consensus	58.223	0.017489	0	1
LYa_b1_contig_152744 (160..3251) consensus	58.0479	8.08151e-18	1.41853e-13	0
LYa_b1_contig_12908 (1..202) consensus	57.9846	0.0141359	0	1
LYa_b1_contig_220579 (906..1682) consensus	57.9599	0.0170826	0	1
LYa_b1_contig_20174 (1183..2363) consensus	57.9186	3.86539e-08	2.29994e-05	0
LYa_b1_contig_6793 (1..649) consensus	57.755	0.0158649	0	1
LYa_b1_contig_225097 (476..834) consensus	57.6963	0.016791	0	1
LYa_b1_contig_127166 (509..870) consensus	57.5794	0.0210863	0	1
LYa_b1_contig_158891 (789..1261) consensus	57.4581	0.0235115	0	1
LYa_b1_contig_318005 (14..467) consensus	57.4066	0.0216538	0	1
LYa_b1_contig_29613 (1..446) consensus	57.3103	0.022963	0	1
LYa_b1_contig_77686 (1097..1623) consensus	57.3103	0.022968	0	1
LYa_b1_contig_302821 (5..610) consensus	57.3103	0.0229661	0	1
LYa_b1_contig_119878 (88..1192) consensus	57.2431	3.70449e-05	0.00467798	1
LYa_b1_contig_227148 (88..504) consensus	57.0894	0.0203084	0	1
LYa_b1_contig_135570 (267..1002) consensus	56.9205	0.0166652	0	1
LYa_b1_contig_48936 (304..658) consensus	56.9032	0.0166414	0	1
LYa_b1_contig_87516 (235..561) consensus	56.8639	0.0168945	0	1
LYa_b1_contig_5179 (1..215) consensus	56.7718	0.0192897	0	1
LYa_b1_contig_281285 (137..451) consensus	56.4526	0.024097	0	1
LYa_b1_contig_114312 (41..572) consensus	56.4526	0.0240963	0	1
LYa_b1_contig_349502 (1..588) consensus	56.4526	0.024099	0	1
LYa_b1_contig_230753 (1..709) consensus	56.4526	0.0240919	0	1
LYa_b1_contig_46576 (1..930) consensus	56.4526	0.0240949	0	1
LYa_b1_contig_259985 (796..1967) consensus	56.4526	0.0240955	0	1
LYa_b1_contig_18502 (78..1853) consensus	56.4526	0.0240945	0	1
LYa_b1_contig_284902 (1..1089) consensus	56.3774	0.000257825	0.0188851	1
LYa_b1_contig_19943 (372..744) consensus	56.3316	0.0166825	0	1
LYa_b1_contig_50120 (1..215) consensus	55.9529	0.0175091	0	1
LYa_b1_contig_11492 (14..753) consensus	55.6854	0.0184612	0	1
LYa_b1_contig_53679 (217..1089) consensus	55.6854	0.0184679	0	1
LYa_b1_contig_139294 (4321..4991) consensus	55.4899	0.015254	0	1
LYa_b1_contig_86811 (1..419) consensus	55.231	0.0178441	0	1
LYa_b1_contig_299066 (62..388) consensus	55.1659	1.10519e-05	0.00185637	1
LYa_b1_contig_119980 (12..878) consensus	54.9101	1.15718e-05	0.00189829	1
LYa_b1_contig_349863 (1..208) consensus	54.871	2.3034e-05	0.00323449	1
LYa_b1_contig_81880 (2080..3134) consensus	54.769	0.0232092	0	1
LYa_b1_contig_31512 (31..347) consensus	54.5002	0.0254089	0	1
LYa_b1_contig_412809 (126..732) consensus	54.5002	0.025416	0	1
LYa_b1_contig_317034 (23..246) consensus	54.3207	0.0245435	0	1
LYa_b1_contig_457784 (45..299) consensus	54.3207	0.0245456	0	1
LYa_b1_contig_120562 (1..257) consensus	54.3207	0.024562	0	1
LYa_b1_contig_349946 (1..336) consensus	54.3207	0.0245604	0	1
LYa_b1_contig_448210 (176..748) consensus	54.3207	0.0245639	0	1
LYa_b1_contig_422211 (348..964) consensus	54.3207	0.0245787	0	1
LYa_b1_contig_302766 (54..936) consensus	54.2174	0.0212305	0	1
LYa_b1_contig_193418 (1..215) consensus	54.0583	0.0186481	0	1
LYa_b1_contig_34224 (1..482) consensus	53.9496	0.0179052	0	1
LYa_b1_contig_49497 (21..652) consensus	53.9496	0.0179024	0	1
LYa_b1_contig_27455 (674..1642) consensus	53.8245	0.0182195	0	1
LYa_b1_contig_213845 (6..1287) consensus	53.7845	7.19467e-06	0.00134705	1
LYa_b1_contig_153346 (164..419) consensus	53.687	0.0217401	0	1
LYa_b1_contig_137435 (1..391) consensus	53.6736	0.0173664	0	1
LYa_b1_contig_32732 (21..491) consensus	53.6679	0.0187947	0	1
LYa_b1_contig_154791 (159..758) consensus	53.5302	0.000464985	0.0286881	1
LYa_b1_contig_451759 (483..734) consensus	53.3723	0.0252616	0	1
LYa_b1_contig_381739 (34..289) consensus	53.3723	0.0252433	0	1
LYa_b1_contig_298641 (1..352) consensus	53.3723	0.0252468	0	1
LYa_b1_contig_25911 (1..559) consensus	53.3723	0.0252463	0	1
LYa_b1_contig_222960 (43..763) consensus	53.3723	0.0252447	0	1
LYa_b1_contig_7477 (127..987) consensus	53.3723	0.0252537	0	1
LYa_b1_contig_297153 (274..507) consensus	53.2667	6.41806e-05	0.00691393	1
LYa_b1_contig_121873 (1..318) consensus	53.1965	0.0187479	0	1
LYa_b1_contig_156588 (1..444) consensus	53.1408	0.0187908	0	1
LYa_b1_contig_76890 (1787..2600) consensus	52.9694	0.0195101	0	1
LYa_b1_contig_189840 (3..679) consensus	52.8543	0.000167245	0.0137499	1
LYa_b1_contig_17590 (612..3068) consensus	52.6418	0.000495975	0.0300121	1
LYa_b1_contig_41089 (1..544) consensus	52.633	2.76525e-05	0.00376261	1
LYa_b1_contig_261339 (625..826) consensus	52.5196	0.0167677	0	1
LYa_b1_contig_2623 (75..335) consensus	52.3084	0.017548	0	1
LYa_b1_contig_202890 (181..643) consensus	52.2967	0.0168717	0	1
LYa_b1_contig_38531 (61..821) consensus	52.089	0.016641	0	1
LYa_b1_contig_64175 (16..334) consensus	52.0143	0.0249411	0	1
LYa_b1_contig_138181 (1..223) consensus	51.9304	6.36718e-09	5.13846e-06	0
LYa_b1_contig_104936 (240..803) consensus	51.8464	0.000503292	0.0301804	1
LYa_b1_contig_130804 (1..251) consensus	51.7761	0.0190145	0	1
LYa_b1_contig_208477 (1..263) consensus	51.6901	0.027483	0	1
LYa_b1_contig_349423 (1..480) consensus	51.6901	0.0274789	0	1
LYa_b1_contig_382316 (83..606) consensus	51.6901	0.0274813	0	1
LYa_b1_contig_132703 (1..1057) consensus	51.4906	6.20747e-05	0.00679926	1
LYa_b1_contig_147931 (1..2124) consensus	51.4651	4.60091e-05	0.00549379	1
LYa_b1_contig_106814 (1..869) consensus	51.3207	1.1264e-10	1.92892e-07	0
LYa_b1_contig_297475 (1..1051) consensus	51.3101	3.10857e-05	0.0040568	1
LYa_b1_contig_457648 (4..364) consensus	51.1834	0.0266974	0	1
LYa_b1_contig_56926 (22..441) consensus	51.1358	0.0194189	0	1
LYa_b1_contig_30155 (9..353) consensus	51.0276	0.0218595	0	1
LYa_b1_contig_295998 (587..1313) consensus	51.0107	0.0194294	0	1
LYa_b1_contig_110071 (169..479) consensus	50.9723	0.0181707	0	1
LYa_b1_contig_75170 (353..1469) consensus	50.8149	0.0198931	0	1
LYa_b1_contig_182644 (1..231) consensus	50.8125	2.61557e-05	0.00359377	1
LYa_b1_contig_96598 (1..733) consensus	50.8118	0.0196093	0	1
LYa_b1_contig_51444 (1..749) consensus	50.8118	0.0196072	0	1
LYa_b1_contig_91960 (8..1420) consensus	50.8103	7.48639e-08	3.95208e-05	0
LYa_b1_contig_51904 (143..825) consensus	50.7005	0.0196545	0	1
LYa_b1_contig_298681 (106..564) consensus	50.481	0.0201125	0	1
LYa_b1_contig_79934 (646..1960) consensus	50.481	0.0201152	0	1
LYa_b1_contig_37515 (3..281) consensus	50.3395	0.0192965	0	1
LYa_b1_contig_33301 (1332..1560) consensus	50.292	0.0273411	0	1
LYa_b1_contig_435824 (41..291) consensus	50.292	0.0273393	0	1
LYa_b1_contig_422466 (1043..1324) consensus	50.292	0.0273372	0	1
LYa_b1_contig_33301 (556..868) consensus	50.292	0.0273379	0	1
LYa_b1_contig_451540 (512..874) consensus	50.292	0.0273353	0	1
LYa_b1_contig_429928 (202..580) consensus	50.292	0.0273402	0	1
LYa_b1_contig_169994 (71..524) consensus	50.292	0.0273381	0	1
LYa_b1_contig_391146 (1..544) consensus	50.292	0.0273562	0	1
LYa_b1_contig_41681 (1..2192) consensus	50.2395	9.56643e-11	1.67917e-07	0
LYa_b1_contig_183314 (1..202) consensus	50.1865	2.81542e-05	0.00378849	1
LYa_b1_contig_1085 (1..939) consensus	50.1719	0.0214625	0	1
LYa_b1_contig_156674 (8..309) consensus	50.1192	0.0186521	0	1
LYa_b1_contig_224616 (10..349) consensus	49.8561	0.0183364	0	1
LYa_b1_contig_70737 (26..555) consensus	49.7708	0.024122	0	1
LYa_b1_contig_57585 (327..1208) consensus	49.6818	1.35614e-05	0.00215693	1
LYa_b1_contig_5474 (984..2764) consensus	49.6245	9.30757e-05	0.00901371	1
LYa_b1_contig_361297 (1842..3264) consensus	49.5978	0.0213282	0	1
LYa_b1_contig_451588 (121..375) consensus	49.5688	0.0215217	0	1
LYa_b1_contig_112237 (1..252) consensus	49.2479	0.0222667	0	1
LYa_b1_contig_20689 (13..572) consensus	49.1481	0.0260619	0	1
LYa_b1_contig_70906 (610..977) consensus	48.9857	0.0216987	0	1
LYa_b1_contig_117743 (1024..2696) consensus	48.9576	8.07317e-06	0.00145713	1
LYa_b1_contig_99465 (1035..2972) consensus	48.9167	5.5233e-05	0.00630563	1
LYa_b1_contig_136244 (19..299) consensus	48.88	0.0285773	0	1
LYa_b1_contig_44843 (78..448) consensus	48.88	0.0285775	0	1
LYa_b1_contig_400714 (4..883) consensus	48.88	0.0285806	0	1
LYa_b1_contig_103453 (188..1178) consensus	48.88	0.0285755	0	1
LYa_b1_contig_128482 (55..399) consensus	48.7442	0.0186811	0	1
LYa_b1_contig_208907 (1..481) consensus	48.7442	0.0186811	0	1
LYa_b1_contig_127444 (387..1010) consensus	48.46	0.021165	0	1
LYa_b1_contig_101512 (712..1391) consensus	48.3113	0.0195936	0	1
LYa_b1_contig_55244 (3700..4093) consensus	48.2134	0.0198778	0	1
LYa_b1_contig_141552 (1..215) consensus	48.1029	0.0197041	0	1
LYa_b1_contig_398812 (153..367) consensus	48.046	0.0294059	0	1
LYa_b1_contig_122734 (37..256) consensus	48.046	0.0294103	0	1
LYa_b1_contig_424861 (17..240) consensus	48.046	0.0294136	0	1
LYa_b1_contig_59519 (616..868) consensus	48.046	0.0294111	0	1
LYa_b1_contig_277771 (719..994) consensus	48.046	0.0294113	0	1
LYa_b1_contig_297441 (190..505) consensus	48.046	0.0294138	0	1
LYa_b1_contig_49092 (272..602) consensus	48.046	0.0294353	0	1
LYa_b1_contig_49887 (22..393) consensus	48.046	0.029428	0	1
LYa_b1_contig_81155 (1..505) consensus	48.046	0.0294263	0	1
LYa_b1_contig_399963 (1..539) consensus	48.046	0.0294278	0	1
LYa_b1_contig_443722 (249..993) consensus	48.046	0.029448	0	1
LYa_b1_contig_296514 (5..1181) consensus	48.046	0.029449	0	1
LYa_b1_contig_1809 (151..1004) consensus	47.9528	1.083e-06	0.000324813	0
LYa_b1_contig_84452 (3..1244) consensus	47.9428	0.0252953	0	1
LYa_b1_contig_381833 (274..780) consensus	47.9324	0.0213682	0	1
LYa_b1_contig_382591 (152..780) consensus	47.9324	0.0213688	0	1
LYa_b1_contig_349414 (1..313) consensus	47.8319	0.000131473	0.0115098	1
LYa_b1_contig_114387 (33..304) consensus	47.6786	0.0253574	0	1
LYa_b1_contig_149580 (632..1116) consensus	47.6679	0.021786	0	1
LYa_b1_contig_297398 (1..714) consensus	47.6679	0.0217867	0	1
LYa_b1_contig_42224 (1..390) consensus	47.6185	0.021754	0	1
LYa_b1_contig_39945 (1..367) consensus	47.5731	8.26524e-05	0.00827832	1
LYa_b1_contig_26055 (10..393) consensus	47.5623	0.0220048	0	1
LYa_b1_contig_121511 (61..381) consensus	47.4479	0.0232405	0	1
LYa_b1_contig_58349 (115..422) consensus	47.3311	0.0256946	0	1
LYa_b1_contig_451982 (16..222) consensus	47.2117	0.0301136	0	1
LYa_b1_contig_394720 (297..564) consensus	47.2117	0.0301127	0	1
LYa_b1_contig_399783 (1..430) consensus	47.2117	0.0301127	0	1
LYa_b1_contig_78392 (1..499) consensus	47.2117	0.0301092	0	1
LYa_b1_contig_350984 (47..487) consensus	47.1867	0.0221331	0	1
LYa_b1_contig_122947 (84..379) consensus	47.1485	0.0208082	0	1
LYa_b1_contig_351693 (273..783) consensus	47.0972	0.0248405	0	1
LYa_b1_contig_111891 (539..1106) consensus	47.0972	0.0248391	0	1
LYa_b1_contig_67486 (1..335) consensus	46.9829	0.0239694	0	1
LYa_b1_contig_308914 (119..508) consensus	46.9517	0.0280004	0	1
LYa_b1_contig_300946 (11..516) consensus	46.9517	0.0280117	0	1
LYa_b1_contig_91552 (1..380) consensus	46.78	0.0240491	0	1
LYa_b1_contig_40603 (418..1176) consensus	46.7157	0.0259373	0	1
LYa_b1_contig_176771 (1..657) consensus	46.6669	5.04749e-10	6.44345e-07	0
LYa_b1_contig_75339 (1..1632) consensus	46.5307	4.40498e-07	0.000161082	0
LYa_b1_contig_89449 (1..1029) consensus	46.5297	0.000703711	0.0373451	1
LYa_b1_contig_68430 (1084..1450) consensus	46.4562	0.0203128	0	1
LYa_b1_contig_145451 (629..1167) consensus	46.4303	0.0252874	0	1
LYa_b1_contig_340005 (7..595) consensus	46.4303	0.0252904	0	1
LYa_b1_contig_9203 (1033..1427) consensus	46.393	0.028063	0	1
LYa_b1_contig_41651 (1131..2160) consensus	46.3025	0.0207619	0	1
LYa_b1_contig_399311 (6..289) consensus	46.0698	0.0308853	0	1
LYa_b1_contig_72331 (1..321) consensus	46.0698	0.0308862	0	1
LYa_b1_contig_143613 (8..343) consensus	46.0698	0.0308865	0	1
LYa_b1_contig_110817 (5..573) consensus	46.0698	0.0308995	0	1
LYa_b1_contig_222600 (1..626) consensus	46.0698	0.0309057	0	1
LYa_b1_contig_214856 (9..1125) consensus	46.0698	0.0309053	0	1
LYa_b1_contig_54276 (1..328) consensus	45.9835	0.020812	0	1
LYa_b1_contig_208828 (671..1040) consensus	45.9069	0.0238689	0	1
LYa_b1_contig_142256 (1..290) consensus	45.7027	0.0222777	0	1
LYa_b1_contig_221553 (122..1189) consensus	45.5342	0.000951141	0.0453721	1
LYa_b1_contig_45570 (1..246) consensus	45.399	0.0217971	0	1
LYa_b1_contig_399725 (1..648) consensus	45.2699	0.000554905	0.0317526	1
LYa_b1_contig_382336 (91..387) consensus	45.2516	0.000150682	0.0127618	1
LYa_b1_contig_211916 (111..1185) consensus	45.1873	0.0236608	0	1
LYa_b1_contig_15853 (1..210) consensus	45.1839	4.40754e-05	0.00532629	1
LYa_b1_contig_142382 (464..1229) consensus	45.0134	0.000478257	0.0292754	1
LYa_b1_contig_5476 (31..426) consensus	44.9115	0.0230137	0	1
LYa_b1_contig_243219 (1..215) consensus	44.9087	0.0323603	0	1
LYa_b1_contig_299117 (97..339) consensus	44.9087	0.0323672	0	1
LYa_b1_contig_22304 (1..341) consensus	44.9087	0.0323694	0	1
LYa_b1_contig_256926 (238..583) consensus	44.9087	0.0323751	0	1
LYa_b1_contig_255186 (206..552) consensus	44.9087	0.0323703	0	1
LYa_b1_contig_209571 (175..534) consensus	44.9087	0.0323665	0	1
LYa_b1_contig_36865 (1..422) consensus	44.9087	0.0323498	0	1
LYa_b1_contig_425056 (89..563) consensus	44.9087	0.0323529	0	1
LYa_b1_contig_92102 (123..1089) consensus	44.9087	0.0323468	0	1
LYa_b1_contig_318234 (79..421) consensus	44.8673	0.0243139	0	1
LYa_b1_contig_14352 (543..892) consensus	44.7531	0.0263604	0	1
LYa_b1_contig_295973 (112..724) consensus	44.7385	0.00105617	0.0487541	1
LYa_b1_contig_94308 (31..647) consensus	44.646	0.0246668	0	1
LYa_b1_contig_405202 (45..491) consensus	44.5915	0.0242674	0	1
LYa_b1_contig_384435 (43..251) consensus	44.5363	0.0241512	0	1
LYa_b1_contig_107847 (41..381) consensus	44.5363	0.0241497	0	1
LYa_b1_contig_152957 (379..936) consensus	44.4368	0.0250223	0	1
LYa_b1_contig_213408 (12..373) consensus	44.2775	0.0285001	0	1
LYa_b1_contig_220793 (2..721) consensus	44.2775	0.028499	0	1
LYa_b1_contig_21044 (1..1490) consensus	44.1737	1.2657e-08	9.25689e-06	0
LYa_b1_contig_89448 (1..222) consensus	44.1314	0.0330908	0	1
LYa_b1_contig_107212 (131..367) consensus	44.1314	0.0330856	0	1
LYa_b1_contig_50355 (1041..1288) consensus	44.1314	0.0330906	0	1
LYa_b1_contig_451622 (31..292) consensus	44.1314	0.0330969	0	1
LYa_b1_contig_349741 (16..444) consensus	44.1314	0.0330921	0	1
LYa_b1_contig_34822 (1..470) consensus	44.1314	0.0330836	0	1
LYa_b1_contig_13779 (138..782) consensus	44.1314	0.0330831	0	1
LYa_b1_contig_349528 (484..1158) consensus	44.1314	0.033073	0	1
LYa_b1_contig_5916 (8..1045) consensus	44.1314	0.0330779	0	1
LYa_b1_contig_53219 (404..1531) consensus	44.1314	0.0331028	0	1
LYa_b1_contig_296282 (59..1906) consensus	44.1314	0.0331098	0	1
LYa_b1_contig_423245 (202..411) consensus	44.0595	0.0266464	0	1
LYa_b1_contig_22592 (1..392) consensus	44.0168	7.17366e-05	0.00748395	1
LYa_b1_contig_111344 (593..987) consensus	43.8718	0.0307307	0	1
LYa_b1_contig_399647 (735..1064) consensus	43.71	5.50336e-06	0.00108538	1
LYa_b1_contig_17068 (12..869) consensus	43.566	4.026e-05	0.00499416	1
LYa_b1_contig_93891 (1..257) consensus	43.539	0.0238593	0	1
LYa_b1_contig_455087 (125..366) consensus	43.2596	0.0335977	0	1
LYa_b1_contig_11236 (1..332) consensus	43.2596	0.0335907	0	1
LYa_b1_contig_156339 (820..1240) consensus	43.2596	0.033596	0	1
LYa_b1_contig_412387 (105..829) consensus	43.2596	0.0336002	0	1
LYa_b1_contig_166655 (1..1220) consensus	43.2596	0.0336008	0	1
LYa_b1_contig_299185 (1228..2615) consensus	43.2596	0.0335952	0	1
LYa_b1_contig_201207 (5..501) consensus	43.09	0.0269322	0	1
LYa_b1_contig_65975 (46..768) consensus	43.09	0.0269345	0	1
LYa_b1_contig_93853 (34..833) consensus	43.0096	0.0257322	0	1
LYa_b1_contig_88191 (144..572) consensus	42.7377	0.0233452	0	1
LYa_b1_contig_100576 (1..380) consensus	42.7198	0.000251732	0.0186013	1
LYa_b1_contig_401953 (50..293) consensus	42.6914	0.0257685	0	1
LYa_b1_contig_163611 (103..849) consensus	42.6241	0.0247538	0	1
LYa_b1_contig_89577 (1..265) consensus	42.5663	0.0261157	0	1
LYa_b1_contig_208828 (185..603) consensus	42.5663	0.0261144	0	1
LYa_b1_contig_38425 (5..328) consensus	42.3727	0.0260866	0	1
LYa_b1_contig_299036 (53..618) consensus	42.251	0.00031205	0.0215855	1
LYa_b1_contig_43566 (2..401) consensus	42.0535	0.0267431	0	1
LYa_b1_contig_382774 (2..437) consensus	42.0404	0.026429	0	1
LYa_b1_contig_76334 (1..1798) consensus	41.9655	9.33983e-07	0.000292762	0
LYa_b1_contig_100467 (3..302) consensus	41.7767	0.027039	0	1
LYa_b1_contig_382060 (409..926) consensus	41.7767	0.027037	0	1
LYa_b1_contig_134646 (429..635) consensus	41.7714	0.0356615	0	1
LYa_b1_contig_298724 (1..216) consensus	41.7714	0.0356685	0	1
LYa_b1_contig_437430 (105..324) consensus	41.7714	0.0356706	0	1
LYa_b1_contig_179893 (3..237) consensus	41.7714	0.035669	0	1
LYa_b1_contig_34273 (3..314) consensus	41.7714	0.0356566	0	1
LYa_b1_contig_120591 (32..614) consensus	41.7714	0.0356535	0	1
LYa_b1_contig_399510 (522..1241) consensus	41.7714	0.0356474	0	1
LYa_b1_contig_261652 (2400..3314) consensus	41.7714	0.0356449	0	1
LYa_b1_contig_351609 (219..1139) consensus	41.7714	0.0356625	0	1
LYa_b1_contig_47277 (96..1329) consensus	41.7714	0.0356705	0	1
LYa_b1_contig_32805 (521..2365) consensus	41.7714	0.0356668	0	1
LYa_b1_contig_198251 (40..376) consensus	41.6447	0.000280457	0.0200938	1
LYa_b1_contig_305843 (69..306) consensus	41.5124	0.0279627	0	1
LYa_b1_contig_301650 (11..286) consensus	41.5124	0.0279604	0	1
LYa_b1_contig_158755 (12..529) consensus	41.5124	0.0279569	0	1
LYa_b1_contig_142188 (18..678) consensus	41.4566	0.0331509	0	1
LYa_b1_contig_82344 (1359..1911) consensus	41.4539	0.0270299	0	1
LYa_b1_contig_160496 (1..598) consensus	41.4509	0.00021358	0.0163173	1
LYa_b1_contig_182939 (50..353) consensus	41.3424	0.027472	0	1
LYa_b1_contig_296742 (1..428) consensus	41.3424	0.0274709	0	1
LYa_b1_contig_116824 (171..518) consensus	41.2856	0.0281939	0	1
LYa_b1_contig_419832 (176..738) consensus	41.2856	0.0281989	0	1
LYa_b1_contig_400198 (1..1085) consensus	41.2752	0.000276558	0.0199431	1
LYa_b1_contig_107728 (1685..2238) consensus	41.1698	0.0309863	0	1
LYa_b1_contig_182632 (163..503) consensus	41.1372	0.0261704	0	1
LYa_b1_contig_433232 (1..227) consensus	41.1108	0.033246	0	1
LYa_b1_contig_300701 (716..1238) consensus	41.1108	0.0332452	0	1
LYa_b1_contig_455274 (67..371) consensus	41.0927	0.0309833	0	1
LYa_b1_contig_235886 (68..312) consensus	41.0511	0.0363932	0	1
LYa_b1_contig_451645 (25..277) consensus	41.0511	0.0363894	0	1
LYa_b1_contig_9507 (741..1049) consensus	41.0511	0.0363931	0	1
LYa_b1_contig_55508 (1..374) consensus	41.0511	0.0363952	0	1
LYa_b1_contig_138688 (1202..1624) consensus	41.0511	0.0364254	0	1
LYa_b1_contig_381960 (65..521) consensus	41.0511	0.036435	0	1
LYa_b1_contig_299083 (17..691) consensus	41.0511	0.0364417	0	1
LYa_b1_contig_302915 (1..767) consensus	41.0511	0.0364494	0	1
LYa_b1_contig_422467 (17..1039) consensus	41.0511	0.0364512	0	1
LYa_b1_contig_94594 (1..486) consensus	41.008	1.06915e-07	5.07204e-05	0
LYa_b1_contig_98946 (38..593) consensus	40.9989	0.00162502	0.0651496	1
LYa_b1_contig_89903 (1..611) consensus	40.9821	0.0311065	0	1
LYa_b1_contig_156509 (311..1829) consensus	40.9224	0.00164515	0.0656295	1
LYa_b1_contig_193534 (27..306) consensus	40.8256	0.0301289	0	1
LYa_b1_contig_40248 (168..500) consensus	40.8199	0.0257359	0	1
LYa_b1_contig_346182 (119..449) consensus	40.792	0.0337914	0	1
LYa_b1_contig_21907 (62..734) consensus	40.7735	0.028216	0	1
LYa_b1_contig_412560 (139..346) consensus	40.7713	0.0335033	0	1
LYa_b1_contig_177864 (1..344) consensus	40.7207	0.0269134	0	1
LYa_b1_contig_43317 (763..1055) consensus	40.716	0.0335397	0	1
LYa_b1_contig_368553 (212..446) consensus	40.5913	0.0295929	0	1
LYa_b1_contig_298689 (1812..2360) consensus	40.5323	0.0319223	0	1
LYa_b1_contig_153391 (9..1275) consensus	40.5323	0.0319224	0	1
LYa_b1_contig_164157 (333..600) consensus	40.5093	0.0293013	0	1
LYa_b1_contig_177385 (239..817) consensus	40.5093	0.0293009	0	1
LYa_b1_contig_430277 (504..754) consensus	40.4494	0.0368689	0	1
LYa_b1_contig_436897 (68..334) consensus	40.4494	0.0368771	0	1
LYa_b1_contig_440663 (1..300) consensus	40.4494	0.0368659	0	1
LYa_b1_contig_302787 (56..398) consensus	40.4494	0.036869	0	1
LYa_b1_contig_13038 (1446..1807) consensus	40.4494	0.0368788	0	1
LYa_b1_contig_36519 (1..415) consensus	40.4494	0.0368809	0	1
LYa_b1_contig_144581 (33..600) consensus	40.4494	0.0368829	0	1
LYa_b1_contig_3109 (28..770) consensus	40.4494	0.0368776	0	1
LYa_b1_contig_71640 (1..773) consensus	40.4494	0.0368782	0	1
LYa_b1_contig_46837 (946..1785) consensus	40.4494	0.0369032	0	1
LYa_b1_contig_90426 (797..1656) consensus	40.4494	0.0369096	0	1
LYa_b1_contig_144878 (911..1473) consensus	40.4458	0.0261816	0	1
LYa_b1_contig_90490 (11..250) consensus	40.3499	0.0257998	0	1
LYa_b1_contig_194061 (1092..1881) consensus	40.2716	0.000947891	0.0453045	1
LYa_b1_contig_78655 (533..1002) consensus	40.1825	0.00140603	0.058761	1
LYa_b1_contig_101502 (4863..5599) consensus	40.1272	0.0266735	0	1
LYa_b1_contig_133368 (1..540) consensus	40.094	0.00172336	0.0676725	1
LYa_b1_contig_130994 (18..502) consensus	40.0697	0.0278817	0	1
LYa_b1_contig_124755 (84..492) consensus	40.0328	7.72255e-05	0.0078924	1
LYa_b1_contig_68180 (17..228) consensus	39.8753	0.028691	0	1
LYa_b1_contig_116228 (22..585) consensus	39.8753	0.0286883	0	1
LYa_b1_contig_296198 (47..584) consensus	39.5941	1.09089e-05	0.00183675	1
LYa_b1_contig_90416 (1..264) consensus	39.5575	0.0288807	0	1
LYa_b1_contig_94946 (1..301) consensus	39.5575	0.0288888	0	1
LYa_b1_contig_248307 (20..312) consensus	39.4883	0.0290788	0	1
LYa_b1_contig_307183 (79..635) consensus	39.4883	0.0290765	0	1
LYa_b1_contig_25218 (1..869) consensus	39.4628	0.00137667	0.057844	1
LYa_b1_contig_196481 (113..370) consensus	39.45	0.0271455	0	1
LYa_b1_contig_154062 (109..379) consensus	39.45	0.0271348	0	1
LYa_b1_contig_214395 (1..274) consensus	39.2831	0.0279887	0	1
LYa_b1_contig_84403 (123..324) consensus	39.2259	0.0292781	0	1
LYa_b1_contig_101849 (1..258) consensus	38.9203	0.030472	0	1
LYa_b1_contig_86394 (6..267) consensus	38.6994	0.0307624	0	1
LYa_b1_contig_400941 (526..745) consensus	38.6342	0.0395003	0	1
LYa_b1_contig_363604 (37..268) consensus	38.6342	0.0394965	0	1
LYa_b1_contig_140836 (90..376) consensus	38.6342	0.0394965	0	1
LYa_b1_contig_48113 (1..300) consensus	38.6342	0.0394966	0	1
LYa_b1_contig_52656 (264..835) consensus	38.6342	0.0395013	0	1
LYa_b1_contig_60000 (1..392) consensus	38.6009	0.0319116	0	1
LYa_b1_contig_17655 (1..222) consensus	38.5831	0.0361287	0	1
LYa_b1_contig_236929 (449..680) consensus	38.4912	0.031416	0	1
LYa_b1_contig_110438 (71..274) consensus	38.4353	0.0321848	0	1
LYa_b1_contig_25237 (1..292) consensus	38.4353	0.0321694	0	1
LYa_b1_contig_295998 (1851..2353) consensus	38.4353	0.0321725	0	1
LYa_b1_contig_190220 (16..378) consensus	38.4253	0.0311206	0	1
LYa_b1_contig_272547 (1789..2278) consensus	38.3711	0.0305178	0	1
LYa_b1_contig_199020 (397..6477) consensus	38.3221	1.30979e-11	3.53698e-08	0
LYa_b1_contig_129233 (1..249) consensus	38.2809	0.0339627	0	1
LYa_b1_contig_20637 (1..389) consensus	38.1705	0.0341861	0	1
LYa_b1_contig_206059 (176..557) consensus	38.147	0.0324115	0	1
LYa_b1_contig_350648 (31..322) consensus	38.1098	0.0298013	0	1
LYa_b1_contig_9172 (20..627) consensus	38.1098	0.029804	0	1
LYa_b1_contig_281682 (44..396) consensus	38.1067	3.12609e-06	0.000724376	1
LYa_b1_contig_97829 (1..512) consensus	38.0054	0.0347437	0	1
LYa_b1_contig_19985 (88..2156) consensus	37.9994	1.15317e-07	5.36192e-05	0
LYa_b1_contig_194113 (559..844) consensus	37.9709	0.0402263	0	1
LYa_b1_contig_360450 (18..322) consensus	37.9709	0.0402616	0	1
LYa_b1_contig_429936 (21..461) consensus	37.9709	0.0402932	0	1
LYa_b1_contig_399433 (34..699) consensus	37.9709	0.0403248	0	1
LYa_b1_contig_172156 (1..692) consensus	37.9709	0.0403206	0	1
LYa_b1_contig_188255 (270..1029) consensus	37.9709	0.0403097	0	1
LYa_b1_contig_158178 (10..319) consensus	37.9603	0.0368349	0	1
LYa_b1_contig_451539 (1..595) consensus	37.9104	0.00010075	0.00950775	1
LYa_b1_contig_138070 (1..463) consensus	37.9052	0.03684	0	1
LYa_b1_contig_10342 (21..1293) consensus	37.7174	8.07204e-09	6.22798e-06	0
LYa_b1_contig_122094 (1..386) consensus	37.7122	0.0373333	0	1
LYa_b1_contig_378323 (1485..2214) consensus	37.6902	0.0334004	0	1
LYa_b1_contig_414959 (206..430) consensus	37.6392	0.0407492	0	1
LYa_b1_contig_296150 (1..273) consensus	37.6392	0.040754	0	1
LYa_b1_contig_89882 (41..413) consensus	37.6392	0.0407497	0	1
LYa_b1_contig_112766 (493..967) consensus	37.6392	0.0407474	0	1
LYa_b1_contig_229165 (39..258) consensus	37.6269	0.0298151	0	1
LYa_b1_contig_261226 (18..307) consensus	37.5698	0.0309607	0	1
LYa_b1_contig_217744 (88..490) consensus	37.4772	0.0287046	0	1
LYa_b1_contig_122734 (805..1196) consensus	37.4623	0.00156279	0.0635183	1
LYa_b1_contig_32970 (1..876) consensus	37.4623	0.00156119	0.0635177	1
LYa_b1_contig_57836 (1..561) consensus	37.4531	0.0353452	0	1
LYa_b1_contig_43927 (24..1522) consensus	37.4531	0.0353332	0	1
LYa_b1_contig_138684 (1..296) consensus	37.3745	0.03256	0	1
LYa_b1_contig_351714 (106..653) consensus	37.366	0.0292276	0	1
LYa_b1_contig_334947 (502..1601) consensus	37.3469	2.76424e-08	1.78055e-05	0
LYa_b1_contig_191569 (14..434) consensus	37.2689	0.0295917	0	1
LYa_b1_contig_3849 (120..2049) consensus	37.2635	3.05694e-06	0.000713058	1
LYa_b1_contig_250709 (32..385) consensus	37.2149	0.0289862	0	1
LYa_b1_contig_296132 (1..1105) consensus	37.1614	1.3344e-06	0.000373264	0
LYa_b1_contig_412711 (124..521) consensus	37.0583	0.0321929	0	1
LYa_b1_contig_88697 (1..442) consensus	36.991	0.0310847	0	1
LYa_b1_contig_261368 (17..600) consensus	36.9519	0.0296612	0	1
LYa_b1_contig_66150 (40..295) consensus	36.9331	0.0330145	0	1
LYa_b1_contig_45661 (1..354) consensus	36.9331	0.0330151	0	1
LYa_b1_contig_106240 (34..560) consensus	36.8976	0.029273	0	1
LYa_b1_contig_382324 (619..1127) consensus	36.7415	0.0322454	0	1
LYa_b1_contig_138229 (48..604) consensus	36.7415	0.0322408	0	1
LYa_b1_contig_76852 (239..473) consensus	36.6884	0.0308899	0	1
LYa_b1_contig_26750 (1..538) consensus	36.6667	1.151e-07	5.36192e-05	0
LYa_b1_contig_378852 (41..270) consensus	36.4242	0.032739	0	1
LYa_b1_contig_90578 (1..319) consensus	36.4242	0.0327405	0	1
LYa_b1_contig_102742 (2685..3429) consensus	36.4242	0.0327428	0	1
LYa_b1_contig_296403 (385..1250) consensus	36.4107	0.0326367	0	1
LYa_b1_contig_177971 (2..430) consensus	36.1487	0.0330461	0	1
LYa_b1_contig_15409 (1..324) consensus	36.1063	0.0336563	0	1
LYa_b1_contig_301116 (110..1154) consensus	36.0525	0.0327325	0	1
LYa_b1_contig_418672 (1..450) consensus	36.0479	5.17352e-05	0.00600393	1
LYa_b1_contig_1089 (1..624) consensus	36.013	7.91417e-06	0.00143954	1
LYa_b1_contig_89229 (1..349) consensus	35.9978	0.0324772	0	1
LYa_b1_contig_119648 (1..440) consensus	35.9978	0.0324796	0	1
LYa_b1_contig_163150 (25..633) consensus	35.9978	0.0324803	0	1
LYa_b1_contig_349564 (1..1160) consensus	35.9521	1.92145e-05	0.00278733	1
LYa_b1_contig_430357 (24..247) consensus	35.6227	0.0353197	0	1
LYa_b1_contig_48936 (1..277) consensus	35.6227	0.0353214	0	1
LYa_b1_contig_30909 (58..258) consensus	35.4969	0.0448699	0	1
LYa_b1_contig_87047 (1..213) consensus	35.4969	0.0448634	0	1
LYa_b1_contig_300728 (33..249) consensus	35.4969	0.0448951	0	1
LYa_b1_contig_206943 (1..224) consensus	35.4969	0.0449231	0	1
LYa_b1_contig_457912 (46..304) consensus	35.4969	0.0449511	0	1
LYa_b1_contig_350308 (1030..1315) consensus	35.4969	0.0449901	0	1
LYa_b1_contig_149864 (258..737) consensus	35.4969	0.0449869	0	1
LYa_b1_contig_32568 (471..1118) consensus	35.4969	0.0449655	0	1
LYa_b1_contig_41683 (663..1313) consensus	35.4969	0.0449462	0	1
LYa_b1_contig_18186 (441..1182) consensus	35.4969	0.044948	0	1
LYa_b1_contig_313653 (2..809) consensus	35.4969	0.0449417	0	1
LYa_b1_contig_138229 (636..1118) consensus	35.4688	0.037268	0	1
LYa_b1_contig_271 (1..357) consensus	35.4246	0.000112708	0.0102771	1
LYa_b1_contig_44637 (348..606) consensus	35.3941	0.0382055	0	1
LYa_b1_contig_108122 (957..1477) consensus	35.3587	0.0374181	0	1
LYa_b1_contig_353163 (79..412) consensus	35.3415	0.0364052	0	1
LYa_b1_contig_126115 (50..822) consensus	35.3415	0.036411	0	1
LYa_b1_contig_352016 (1..1105) consensus	35.288	0.0353117	0	1
LYa_b1_contig_297858 (19..694) consensus	35.1835	0.0415289	0	1
LYa_b1_contig_130904 (590..834) consensus	35.1786	0.034862	0	1
LYa_b1_contig_50677 (727..990) consensus	35.1227	0.0354823	0	1
LYa_b1_contig_356979 (1..470) consensus	35.1227	0.0354811	0	1
LYa_b1_contig_99284 (277..674) consensus	35.0941	0.0403432	0	1
LYa_b1_contig_93181 (783..1023) consensus	35.027	0.0346506	0	1
LYa_b1_contig_97188 (1..397) consensus	34.9732	0.0338818	0	1
LYa_b1_contig_116643 (159..926) consensus	34.9652	0.00224839	0.0809962	1
LYa_b1_contig_284844 (24..236) consensus	34.9499	0.0414939	0	1
LYa_b1_contig_90652 (115..773) consensus	34.9499	0.0414918	0	1
LYa_b1_contig_84911 (557..799) consensus	34.8906	0.0457856	0	1
LYa_b1_contig_424003 (56..336) consensus	34.8906	0.0457896	0	1
LYa_b1_contig_297119 (174..478) consensus	34.8906	0.0458003	0	1
LYa_b1_contig_444134 (166..573) consensus	34.8906	0.0458073	0	1
LYa_b1_contig_52778 (45..491) consensus	34.8906	0.0457935	0	1
LYa_b1_contig_47460 (1780..2386) consensus	34.8906	0.0457814	0	1
LYa_b1_contig_5916 (1077..2102) consensus	34.8906	0.0457814	0	1
LYa_b1_contig_249973 (33..281) consensus	34.8696	0.0393065	0	1
LYa_b1_contig_32049 (17..1472) consensus	34.867	0.000295233	0.020697	1
LYa_b1_contig_383394 (176..387) consensus	34.8288	0.04446	0	1
LYa_b1_contig_59 (5..228) consensus	34.8288	0.0444543	0	1
LYa_b1_contig_85120 (824..1108) consensus	34.8288	0.0444668	0	1
LYa_b1_contig_296150 (276..814) consensus	34.8288	0.0444945	0	1
LYa_b1_contig_6301 (1..1507) consensus	34.8288	0.044477	0	1
LYa_b1_contig_159856 (20..256) consensus	34.8067	0.0348449	0	1
LYa_b1_contig_132588 (146..434) consensus	34.6027	0.0331811	0	1
LYa_b1_contig_198303 (1..747) consensus	34.4657	0.000302153	0.0210044	1
LYa_b1_contig_240473 (7..255) consensus	34.4502	0.033955	0	1
LYa_b1_contig_101037 (1..220) consensus	34.3741	0.0399158	0	1
LYa_b1_contig_42174 (1..698) consensus	34.3741	0.0399162	0	1
LYa_b1_contig_121084 (142..1536) consensus	34.2921	0.000290677	0.0205526	1
LYa_b1_contig_88121 (1..211) consensus	34.2863	0.0332982	0	1
LYa_b1_contig_454533 (1..508) consensus	34.284	1.27333e-07	5.76784e-05	0
LYa_b1_contig_50808 (6..378) consensus	34.2402	0.0369875	0	1
LYa_b1_contig_143491 (2..336) consensus	34.23	0.0342308	0	1
LYa_b1_contig_295936 (1293..1678) consensus	34.1344	0.0337978	0	1
LYa_b1_contig_50825 (4..288) consensus	34.1149	0.0384197	0	1
LYa_b1_contig_21759 (799..1129) consensus	34.1149	0.0384153	0	1
LYa_b1_contig_64842 (293..816) consensus	34.1149	0.0384176	0	1
LYa_b1_contig_67474 (1..204) consensus	34.0252	0.0333162	0	1
LYa_b1_contig_115971 (29..259) consensus	34.0252	0.0333212	0	1
LYa_b1_contig_9964 (1..310) consensus	34.0252	0.0333247	0	1
LYa_b1_contig_71542 (303..679) consensus	33.9694	0.0339686	0	1
LYa_b1_contig_378323 (169..707) consensus	33.9246	0.0368037	0	1
LYa_b1_contig_225935 (416..1039) consensus	33.8717	0.0350398	0	1
LYa_b1_contig_9365 (726..1356) consensus	33.8717	0.0350469	0	1
LYa_b1_contig_169824 (153..445) consensus	33.8551	0.0375145	0	1
LYa_b1_contig_297184 (54..364) consensus	33.8551	0.0375144	0	1
LYa_b1_contig_3225 (1..502) consensus	33.8339	4.00988e-10	5.56909e-07	0
LYa_b1_contig_179122 (1..276) consensus	33.8181	0.0341042	0	1
LYa_b1_contig_209464 (44..342) consensus	33.8181	0.0341051	0	1
LYa_b1_contig_155734 (94..791) consensus	33.8181	0.0341105	0	1
LYa_b1_contig_91934 (1..236) consensus	33.7635	0.0338606	0	1
LYa_b1_contig_371773 (96..543) consensus	33.7244	0.000708464	0.0374845	1
LYa_b1_contig_11332 (1..380) consensus	33.7081	0.0342557	0	1
LYa_b1_contig_162760 (2..286) consensus	33.5552	0.0356227	0	1
LYa_b1_contig_175826 (1134..1465) consensus	33.4462	0.0350542	0	1
LYa_b1_contig_345016 (30..389) consensus	33.3904	0.0358533	0	1
LYa_b1_contig_47275 (1..225) consensus	33.3337	0.0374515	0	1
LYa_b1_contig_16181 (97..325) consensus	33.2917	0.0380217	0	1
LYa_b1_contig_170827 (743..1129) consensus	33.2917	0.0380429	0	1
LYa_b1_contig_72564 (1..218) consensus	33.1282	0.0369267	0	1
LYa_b1_contig_40952 (49..869) consensus	33.072	0.0383052	0	1
LYa_b1_contig_349760 (11..329) consensus	32.9743	0.039607	0	1
LYa_b1_contig_34223 (325..777) consensus	32.9743	0.0396073	0	1
LYa_b1_contig_126109 (6..309) consensus	32.8654	0.0387477	0	1
LYa_b1_contig_191368 (6..280) consensus	32.6564	0.041962	0	1
LYa_b1_contig_35014 (43..468) consensus	32.6564	0.0419591	0	1
LYa_b1_contig_5542 (1..2308) consensus	32.6502	1.90909e-07	8.20773e-05	0
LYa_b1_contig_452104 (47..269) consensus	32.5466	0.0421163	0	1
LYa_b1_contig_132631 (1..259) consensus	32.5466	0.0421195	0	1
LYa_b1_contig_100081 (2..994) consensus	32.402	4.37455e-08	2.47695e-05	0
LYa_b1_contig_10561 (1..2690) consensus	32.39	1.25905e-09	1.38124e-06	0
LYa_b1_contig_132569 (23..226) consensus	32.3598	0.0500347	0	1
LYa_b1_contig_299380 (1..208) consensus	32.3598	0.0500221	0	1
LYa_b1_contig_419463 (193..400) consensus	32.3598	0.0500189	0	1
LYa_b1_contig_330919 (2852..3076) consensus	32.3598	0.0500157	0	1
LYa_b1_contig_115133 (1..244) consensus	32.3598	0.0500149	0	1
LYa_b1_contig_122734 (531..789) consensus	32.3598	0.0500011	0	1
LYa_b1_contig_422590 (36..306) consensus	32.3598	0.0499877	0	1
LYa_b1_contig_61569 (1096..1418) consensus	32.3598	0.0499744	0	1
LYa_b1_contig_21073 (1306..1667) consensus	32.3598	0.0499534	0	1
LYa_b1_contig_52655 (8..374) consensus	32.3598	0.0499378	0	1
LYa_b1_contig_20878 (8..472) consensus	32.3598	0.0499427	0	1
LYa_b1_contig_82514 (52..548) consensus	32.3598	0.0499394	0	1
LYa_b1_contig_299096 (1..506) consensus	32.3598	0.0499401	0	1
LYa_b1_contig_298093 (36..550) consensus	32.3598	0.0499277	0	1
LYa_b1_contig_399763 (176..781) consensus	32.3598	0.0499144	0	1
LYa_b1_contig_334097 (1..1130) consensus	32.3598	0.049904	0	1
LYa_b1_contig_195840 (4..882) consensus	32.3399	0.000207217	0.016023	1
LYa_b1_contig_405556 (1..1947) consensus	32.3295	5.05821e-13	2.36761e-09	0
LYa_b1_contig_27934 (1..3150) consensus	32.2946	4.31133e-07	0.000160102	0
LYa_b1_contig_445037 (152..390) consensus	32.257	0.0426865	0	1
LYa_b1_contig_144549 (76..800) consensus	32.224	1.6216e-05	0.00245375	1
LYa_b1_contig_310495 (37..242) consensus	32.1508	0.0398378	0	1
LYa_b1_contig_223169 (18..385) consensus	32.1508	0.0398341	0	1
LYa_b1_contig_95994 (1..505) consensus	32.1102	0.000356923	0.023731	1
LYa_b1_contig_83709 (25..555) consensus	32.0963	0.0395825	0	1
LYa_b1_contig_37588 (391..751) consensus	32.0473	0.0463046	0	1
LYa_b1_contig_37964 (6..491) consensus	32.0473	0.0463173	0	1
LYa_b1_contig_260905 (319..551) consensus	32.0409	0.0400254	0	1
LYa_b1_contig_138762 (2412..2687) consensus	32.0409	0.0400222	0	1
LYa_b1_contig_181176 (1..300) consensus	32.0409	0.0400226	0	1
LYa_b1_contig_17093 (575..1043) consensus	32.0409	0.0400244	0	1
LYa_b1_contig_423004 (1..221) consensus	32.0185	0.0507737	0	1
LYa_b1_contig_452104 (417..692) consensus	32.0185	0.0507742	0	1
LYa_b1_contig_106377 (84..380) consensus	32.0185	0.050774	0	1
LYa_b1_contig_19707 (372..674) consensus	32.0185	0.0507377	0	1
LYa_b1_contig_150776 (27..339) consensus	32.0185	0.0506959	0	1
LYa_b1_contig_35566 (186..500) consensus	32.0185	0.0506821	0	1
LYa_b1_contig_19707 (1..324) consensus	32.0185	0.0506822	0	1
LYa_b1_contig_111828 (1..330) consensus	32.0185	0.0506999	0	1
LYa_b1_contig_312203 (21..445) consensus	32.0185	0.05072	0	1
LYa_b1_contig_86080 (356..836) consensus	32.0185	0.0507405	0	1
LYa_b1_contig_35917 (1015..1512) consensus	32.0185	0.0507379	0	1
LYa_b1_contig_152425 (8..602) consensus	32.0185	0.050736	0	1
LYa_b1_contig_84069 (48..655) consensus	32.0185	0.050734	0	1
LYa_b1_contig_58132 (25..669) consensus	32.0185	0.0507348	0	1
LYa_b1_contig_123479 (33..690) consensus	32.0185	0.0507657	0	1
LYa_b1_contig_30515 (1174..1889) consensus	32.0185	0.0507681	0	1
LYa_b1_contig_429899 (54..813) consensus	32.0185	0.0507652	0	1
LYa_b1_contig_24032 (1..763) consensus	32.0185	0.0507658	0	1
LYa_b1_contig_35917 (40..948) consensus	32.0185	0.0507588	0	1
LYa_b1_contig_9499 (1..700) consensus	31.9847	0.0411918	0	1
LYa_b1_contig_371310 (55..289) consensus	31.9438	0.0404361	0	1
LYa_b1_contig_137249 (93..548) consensus	31.9438	0.0404282	0	1
LYa_b1_contig_169177 (1..234) consensus	31.9275	0.0432034	0	1
LYa_b1_contig_422501 (68..295) consensus	31.8694	0.0464093	0	1
LYa_b1_contig_63620 (1..380) consensus	31.8694	0.0464361	0	1
LYa_b1_contig_152180 (110..579) consensus	31.8694	0.0464376	0	1
LYa_b1_contig_12342 (1..339) consensus	31.8367	0.0384522	0	1
LYa_b1_contig_428666 (127..330) consensus	31.8104	0.0511007	0	1
LYa_b1_contig_403129 (103..329) consensus	31.8104	0.0511066	0	1
LYa_b1_contig_50355 (1530..1776) consensus	31.8104	0.0511126	0	1
LYa_b1_contig_443939 (1030..1277) consensus	31.8104	0.0511205	0	1
LYa_b1_contig_302181 (2..258) consensus	31.8104	0.0511371	0	1
LYa_b1_contig_81423 (125..403) consensus	31.8104	0.0511434	0	1
LYa_b1_contig_107998 (138..468) consensus	31.8104	0.0511331	0	1
LYa_b1_contig_45578 (1..339) consensus	31.8104	0.0511225	0	1
LYa_b1_contig_269678 (63..432) consensus	31.8104	0.051123	0	1
LYa_b1_contig_349525 (1..445) consensus	31.8104	0.0511248	0	1
LYa_b1_contig_299034 (1..478) consensus	31.8104	0.0511281	0	1
LYa_b1_contig_35325 (624..1202) consensus	31.8104	0.0511345	0	1
LYa_b1_contig_301249 (25..709) consensus	31.8104	0.0511227	0	1
LYa_b1_contig_423661 (207..966) consensus	31.8104	0.0511352	0	1
LYa_b1_contig_317591 (29..1291) consensus	31.8104	0.0511476	0	1
LYa_b1_contig_131638 (1331..1614) consensus	31.7818	0.0385303	0	1
LYa_b1_contig_9620 (1..520) consensus	31.7462	0.000774027	0.0394983	1
LYa_b1_contig_110361 (1..391) consensus	31.7342	0.0439927	0	1
LYa_b1_contig_261365 (212..693) consensus	31.7342	0.0439922	0	1
LYa_b1_contig_6132 (17..672) consensus	31.7342	0.0439837	0	1
LYa_b1_contig_82938 (17..493) consensus	31.726	0.0392753	0	1
LYa_b1_contig_416008 (1..471) consensus	31.6693	0.0408431	0	1
LYa_b1_contig_24090 (1..226) consensus	31.63	0.0391407	0	1
LYa_b1_contig_129530 (174..690) consensus	31.6117	0.0432712	0	1
LYa_b1_contig_117409 (529..1025) consensus	31.5765	0.0381365	0	1
LYa_b1_contig_331518 (2034..2376) consensus	31.5532	0.0471467	0	1
LYa_b1_contig_51156 (1..562) consensus	31.5532	0.0471515	0	1
LYa_b1_contig_218762 (151..2227) consensus	31.5532	0.0471512	0	1
LYa_b1_contig_124417 (8..816) consensus	31.5217	0.000502493	0.0301804	1
LYa_b1_contig_13895 (1..541) consensus	31.5019	9.24534e-05	0.00896581	1
LYa_b1_contig_381982 (1..417) consensus	31.4954	0.00073448	0.0382665	1
LYa_b1_contig_73441 (1..625) consensus	31.3685	0.0400322	0	1
LYa_b1_contig_256915 (1..213) consensus	31.2953	0.0445663	0	1
LYa_b1_contig_82737 (10..503) consensus	31.2675	0.000774091	0.0394983	1
LYa_b1_contig_52882 (623..2157) consensus	31.2111	1.02494e-05	0.00176378	1
LYa_b1_contig_27455 (106..361) consensus	31.2068	0.0379444	0	1
LYa_b1_contig_82149 (1..337) consensus	31.1511	0.0387114	0	1
LYa_b1_contig_273978 (1..204) consensus	31.1149	1.19034e-05	0.00193461	1
LYa_b1_contig_259532 (64..299) consensus	31.1064	0.0419499	0	1
LYa_b1_contig_208003 (13..581) consensus	31.0944	0.0403305	0	1
LYa_b1_contig_63835 (268..907) consensus	31.0944	0.0403317	0	1
LYa_b1_contig_58340 (34..717) consensus	31.0944	0.0403329	0	1
LYa_b1_contig_186676 (87..1054) consensus	31.0904	0.000821859	0.0410701	1
LYa_b1_contig_12353 (1..223) consensus	31.0448	0.00324348	0.101243	1
LYa_b1_contig_157974 (1..240) consensus	30.9462	0.0382713	0	1
LYa_b1_contig_27589 (13..266) consensus	30.8909	0.0387211	0	1
LYa_b1_contig_175826 (162..432) consensus	30.8348	0.0400226	0	1
LYa_b1_contig_164948 (231..580) consensus	30.7916	0.0419389	0	1
LYa_b1_contig_204037 (290..699) consensus	30.7916	0.0419398	0	1
LYa_b1_contig_191203 (1298..1909) consensus	30.7916	0.0419346	0	1
LYa_b1_contig_95317 (13..1160) consensus	30.7311	0.000202076	0.015737	1
LYa_b1_contig_156256 (1..1633) consensus	30.7177	8.04774e-08	4.16369e-05	0
LYa_b1_contig_113426 (1..264) consensus	30.6849	0.0393212	0	1
LYa_b1_contig_67180 (1489..1996) consensus	30.6849	0.0393174	0	1
LYa_b1_contig_54885 (1..604) consensus	30.6849	0.039316	0	1
LYa_b1_contig_17105 (1..908) consensus	30.6699	0.00139307	0.0583932	1
LYa_b1_contig_448259 (129..395) consensus	30.5178	0.042318	0	1
LYa_b1_contig_230807 (198..522) consensus	30.4516	0.00305201	0.0977577	1
LYa_b1_contig_98002 (6..526) consensus	30.4229	0.0412249	0	1
LYa_b1_contig_63352 (1..1725) consensus	30.4126	2.85832e-05	0.00383719	1
LYa_b1_contig_137386 (1..699) consensus	30.4053	6.72311e-06	0.0012862	1
LYa_b1_contig_231744 (30..290) consensus	30.3134	0.041363	0	1
LYa_b1_contig_23014 (1..212) consensus	30.2573	0.0429816	0	1
LYa_b1_contig_315775 (14..2051) consensus	30.2176	4.35538e-07	0.000160102	0
LYa_b1_contig_138762 (6..2178) consensus	30.1969	2.95175e-08	1.86708e-05	0
LYa_b1_contig_112869 (547..771) consensus	30.1064	0.0430899	0	1
LYa_b1_contig_122078 (61..418) consensus	30.1064	0.0430836	0	1
LYa_b1_contig_46680 (39..609) consensus	30.1064	0.0430772	0	1
LYa_b1_contig_130183 (1..803) consensus	30.0907	0.00019147	0.0151205	1
LYa_b1_contig_162767 (1..206) consensus	30.0517	0.0431425	0	1
LYa_b1_contig_65242 (8..323) consensus	29.996	0.0443852	0	1
LYa_b1_contig_280939 (137..631) consensus	29.8451	0.000482053	0.0294308	1
LYa_b1_contig_43428 (20..447) consensus	29.7893	0.0459599	0	1
LYa_b1_contig_136744 (1..815) consensus	29.5602	0.000497533	0.0300622	1
LYa_b1_contig_345285 (1322..1580) consensus	29.5566	0.00312749	0.0989565	1
LYa_b1_contig_64501 (1..254) consensus	29.5261	0.0504505	0	1
LYa_b1_contig_13289 (1053..1544) consensus	29.5261	0.0504863	0	1
LYa_b1_contig_33976 (4..363) consensus	29.4921	5.7582e-07	0.00020266	0
LYa_b1_contig_108122 (499..935) consensus	29.4714	0.0506026	0	1
LYa_b1_contig_1307 (1..1116) consensus	29.4614	2.40766e-05	0.00336741	1
LYa_b1_contig_301756 (71..1453) consensus	29.3677	9.45944e-08	4.67716e-05	0
LYa_b1_contig_309967 (1..532) consensus	29.3485	3.06807e-06	0.000713285	1
LYa_b1_contig_191570 (37..1312) consensus	29.2896	5.35601e-07	0.000190889	0
LYa_b1_contig_116121 (37..240) consensus	29.2226	0.0562771	0	1
LYa_b1_contig_69210 (1..213) consensus	29.2226	0.0562862	0	1
LYa_b1_contig_197807 (1361..1597) consensus	29.2226	0.0562898	0	1
LYa_b1_contig_166266 (89..333) consensus	29.2226	0.0562934	0	1
LYa_b1_contig_52640 (1..259) consensus	29.2226	0.0562778	0	1
LYa_b1_contig_393357 (187..455) consensus	29.2226	0.0562621	0	1
LYa_b1_contig_81979 (159..453) consensus	29.2226	0.0562465	0	1
LYa_b1_contig_87680 (446..764) consensus	29.2226	0.056227	0	1
LYa_b1_contig_217764 (467..790) consensus	29.2226	0.0562075	0	1
LYa_b1_contig_121322 (217..541) consensus	29.2226	0.0561784	0	1
LYa_b1_contig_261652 (340..666) consensus	29.2226	0.0561876	0	1
LYa_b1_contig_298289 (447..872) consensus	29.2226	0.0561969	0	1
LYa_b1_contig_62704 (263..737) consensus	29.2226	0.0562061	0	1
LYa_b1_contig_62166 (1..484) consensus	29.2226	0.0562203	0	1
LYa_b1_contig_90081 (13..535) consensus	29.2226	0.0562402	0	1
LYa_b1_contig_19318 (615..1156) consensus	29.2226	0.05626	0	1
LYa_b1_contig_350078 (26..579) consensus	29.2226	0.0562631	0	1
LYa_b1_contig_14277 (1..597) consensus	29.2226	0.0562625	0	1
LYa_b1_contig_9351 (177..825) consensus	29.2226	0.0562619	0	1
LYa_b1_contig_22675 (617..2097) consensus	29.2226	0.0562528	0	1
LYa_b1_contig_24625 (43..4002) consensus	29.2226	0.0562449	0	1
LYa_b1_contig_390830 (26..228) consensus	29.208	0.0562249	0	1
LYa_b1_contig_83445 (17..220) consensus	29.208	0.0562212	0	1
LYa_b1_contig_114068 (66..286) consensus	29.208	0.0562163	0	1
LYa_b1_contig_160509 (36..300) consensus	29.208	0.0562139	0	1
LYa_b1_contig_85971 (846..1116) consensus	29.208	0.0562169	0	1
LYa_b1_contig_353597 (1188..1498) consensus	29.208	0.0562198	0	1
LYa_b1_contig_78516 (1..323) consensus	29.208	0.0562249	0	1
LYa_b1_contig_11594 (1..354) consensus	29.208	0.0562299	0	1
LYa_b1_contig_88840 (795..1201) consensus	29.208	0.0562707	0	1
LYa_b1_contig_351071 (1..433) consensus	29.208	0.0562787	0	1
LYa_b1_contig_92177 (1532..2051) consensus	29.208	0.0562846	0	1
LYa_b1_contig_355005 (1491..2056) consensus	29.208	0.0562905	0	1
LYa_b1_contig_314626 (97..704) consensus	29.208	0.0562964	0	1
LYa_b1_contig_93641 (23..667) consensus	29.208	0.0563144	0	1
LYa_b1_contig_152425 (626..1279) consensus	29.208	0.0563324	0	1
LYa_b1_contig_13820 (1..806) consensus	29.208	0.0563611	0	1
LYa_b1_contig_127219 (5018..5871) consensus	29.208	0.0563673	0	1
LYa_b1_contig_296062 (280..1355) consensus	29.208	0.0563923	0	1
LYa_b1_contig_299028 (158..1390) consensus	29.208	0.0564174	0	1
LYa_b1_contig_399761 (135..347) consensus	29.1718	0.0512688	0	1
LYa_b1_contig_110722 (44..327) consensus	29.1718	0.0512823	0	1
LYa_b1_contig_304116 (12..326) consensus	29.1718	0.051279	0	1
LYa_b1_contig_82192 (1..462) consensus	29.1201	0.0481728	0	1
LYa_b1_contig_123515 (1..225) consensus	29.0673	0.046342	0	1
LYa_b1_contig_225171 (197..509) consensus	29.0673	0.0463525	0	1
LYa_b1_contig_306997 (1..384) consensus	29.0673	0.0463455	0	1
LYa_b1_contig_113628 (11..506) consensus	29.0673	0.0463524	0	1
LYa_b1_contig_109568 (1232..1739) consensus	29.0673	0.0463494	0	1
LYa_b1_contig_349725 (1..277) consensus	29.0474	2.22513e-05	0.00314344	1
LYa_b1_contig_136687 (1..248) consensus	29.0136	0.0455454	0	1
LYa_b1_contig_21776 (1..344) consensus	29.0136	0.0455429	0	1
LYa_b1_contig_412747 (5..579) consensus	29.0136	0.0455404	0	1
LYa_b1_contig_49032 (9..234) consensus	28.9589	0.045639	0	1
LYa_b1_contig_146579 (1..226) consensus	28.9589	0.0456369	0	1
LYa_b1_contig_305857 (140..371) consensus	28.9589	0.0456403	0	1
LYa_b1_contig_295916 (1..212) consensus	28.9112	0.0521552	0	1
LYa_b1_contig_110172 (1..258) consensus	28.9112	0.0521561	0	1
LYa_b1_contig_134646 (131..404) consensus	28.9112	0.0521569	0	1
LYa_b1_contig_209585 (376..808) consensus	28.9033	0.0465945	0	1
LYa_b1_contig_171352 (1..381) consensus	28.86	0.0482012	0	1
LYa_b1_contig_9134 (1..360) consensus	28.8525	0.000360757	0.0238954	1
LYa_b1_contig_54967 (1..448) consensus	28.7889	0.0519716	0	1
LYa_b1_contig_4179 (84..1104) consensus	28.7889	0.0519814	0	1
LYa_b1_contig_118198 (427..716) consensus	28.7547	0.0445449	0	1
LYa_b1_contig_354145 (38..252) consensus	28.7302	0.0573052	0	1
LYa_b1_contig_349529 (1..216) consensus	28.7302	0.0572883	0	1
LYa_b1_contig_234258 (533..750) consensus	28.7302	0.0572714	0	1
LYa_b1_contig_303800 (32..310) consensus	28.7302	0.0572598	0	1
LYa_b1_contig_412390 (32..326) consensus	28.7302	0.0572436	0	1
LYa_b1_contig_422728 (8..371) consensus	28.7302	0.0572274	0	1
LYa_b1_contig_41798 (351..731) consensus	28.7302	0.0572274	0	1
LYa_b1_contig_353314 (21..405) consensus	28.7302	0.0572261	0	1
LYa_b1_contig_14581 (185..678) consensus	28.7302	0.0572467	0	1
LYa_b1_contig_71096 (3..933) consensus	28.7302	0.0572561	0	1
LYa_b1_contig_65651 (1..932) consensus	28.7302	0.0572655	0	1
LYa_b1_contig_296109 (98..1396) consensus	28.7302	0.057261	0	1
LYa_b1_contig_19160 (1..228) consensus	28.7005	0.0441505	0	1
LYa_b1_contig_259448 (51..315) consensus	28.7005	0.0441559	0	1
LYa_b1_contig_283046 (37..514) consensus	28.7005	0.0441664	0	1
LYa_b1_contig_173988 (321..686) consensus	28.6454	0.0446936	0	1
LYa_b1_contig_106363 (1..214) consensus	28.5892	0.046157	0	1
LYa_b1_contig_56484 (851..1135) consensus	28.5892	0.0461613	0	1
LYa_b1_contig_28145 (1..931) consensus	28.5709	5.07813e-09	4.24453e-06	0
LYa_b1_contig_89765 (20..252) consensus	28.532	0.0487168	0	1
LYa_b1_contig_356314 (1..280) consensus	28.532	0.0487048	0	1
LYa_b1_contig_175241 (57..499) consensus	28.532	0.0486966	0	1
LYa_b1_contig_170553 (529..1076) consensus	28.532	0.0486882	0	1
LYa_b1_contig_45048 (1..243) consensus	28.495	0.0445634	0	1
LYa_b1_contig_214931 (683..927) consensus	28.4739	0.0531303	0	1
LYa_b1_contig_38357 (1..266) consensus	28.4739	0.053146	0	1
LYa_b1_contig_58743 (980..1483) consensus	28.4739	0.0531451	0	1
LYa_b1_contig_179952 (11..315) consensus	28.3312	0.0448223	0	1
LYa_b1_contig_308566 (27..339) consensus	28.3203	0.00335385	0.103289	1
LYa_b1_contig_214068 (77..338) consensus	28.2867	0.0483034	0	1
LYa_b1_contig_157700 (2..347) consensus	28.2867	0.0482921	0	1
LYa_b1_contig_208340 (142..371) consensus	28.2745	0.0469761	0	1
LYa_b1_contig_178077 (1090..1443) consensus	28.2745	0.0469745	0	1
LYa_b1_contig_399647 (325..723) consensus	28.2673	0.000158831	0.0132442	1
LYa_b1_contig_200188 (91..2075) consensus	28.2666	9.93438e-10	1.18221e-06	0
LYa_b1_contig_94500 (206..562) consensus	28.2431	0.00360275	0.107548	1
LYa_b1_contig_66129 (1..402) consensus	28.2346	0.0456566	0	1
LYa_b1_contig_244231 (49..425) consensus	28.2169	0.0504683	0	1
LYa_b1_contig_415157 (34..462) consensus	28.2169	0.0504742	0	1
LYa_b1_contig_146414 (48..258) consensus	28.1816	0.0442655	0	1
LYa_b1_contig_76703 (45..381) consensus	28.1816	0.0442663	0	1
LYa_b1_contig_118576 (506..1745) consensus	28.1204	0.000426114	0.0267841	1
LYa_b1_contig_329766 (2..217) consensus	28.0724	0.0445157	0	1
LYa_b1_contig_94039 (1267..1483) consensus	28.0724	0.044517	0	1
LYa_b1_contig_56364 (2..701) consensus	28.0724	0.0445184	0	1
LYa_b1_contig_110973 (1..262) consensus	28.0163	0.0460919	0	1
LYa_b1_contig_44419 (2..273) consensus	28.0163	0.0460901	0	1
LYa_b1_contig_15165 (569..1041) consensus	28.0163	0.0460882	0	1
LYa_b1_contig_172262 (1349..1558) consensus	27.9735	0.047885	0	1
LYa_b1_contig_182345 (1..410) consensus	27.9735	0.0479013	0	1
LYa_b1_contig_92981 (320..858) consensus	27.9735	0.0479054	0	1
LYa_b1_contig_272831 (4..250) consensus	27.9592	0.0489823	0	1
LYa_b1_contig_358852 (59..320) consensus	27.9592	0.0489795	0	1
LYa_b1_contig_84652 (520..953) consensus	27.9592	0.0489771	0	1
LYa_b1_contig_55989 (635..1362) consensus	27.9592	0.0489747	0	1
LYa_b1_contig_253354 (22..367) consensus	27.921	0.0457722	0	1
LYa_b1_contig_113690 (262..948) consensus	27.921	0.0457638	0	1
LYa_b1_contig_4820 (105..411) consensus	27.8129	0.0449497	0	1
LYa_b1_contig_298089 (19..1124) consensus	27.7806	5.34638e-05	0.00613357	1
LYa_b1_contig_170246 (1..293) consensus	27.7573	0.0460699	0	1
LYa_b1_contig_444621 (1..489) consensus	27.7152	0.00313476	0.0990971	1
LYa_b1_contig_11010 (1..438) consensus	27.7009	2.99436e-05	0.00394442	1
LYa_b1_contig_53211 (1..459) consensus	27.7007	0.048463	0	1
LYa_b1_contig_85988 (761..1238) consensus	27.7007	0.0484655	0	1
LYa_b1_contig_81161 (1..281) consensus	27.6596	0.0485063	0	1
LYa_b1_contig_351561 (1..314) consensus	27.6596	0.0485076	0	1
LYa_b1_contig_298984 (21..269) consensus	27.6067	0.0467321	0	1
LYa_b1_contig_47906 (1..252) consensus	27.5527	0.0462529	0	1
LYa_b1_contig_145282 (142..430) consensus	27.4977	0.0469138	0	1
LYa_b1_contig_241899 (551..970) consensus	27.4977	0.0469158	0	1
LYa_b1_contig_99808 (290..559) consensus	27.4416	0.0488639	0	1
LYa_b1_contig_197708 (613..915) consensus	27.4416	0.048861	0	1
LYa_b1_contig_80549 (285..653) consensus	27.4416	0.0488616	0	1
LYa_b1_contig_93380 (441..1072) consensus	27.4416	0.0488623	0	1
LYa_b1_contig_102606 (13..696) consensus	27.3767	4.33567e-07	0.000160102	0
LYa_b1_contig_107788 (605..941) consensus	27.3451	0.0499332	0	1
LYa_b1_contig_62587 (38..251) consensus	27.2917	0.048625	0	1
LYa_b1_contig_65174 (17..272) consensus	27.2917	0.0486274	0	1
LYa_b1_contig_120464 (229..523) consensus	27.25	1.92887e-07	8.20773e-05	0
LYa_b1_contig_238506 (357..581) consensus	27.2372	0.0487292	0	1
LYa_b1_contig_47803 (37..1588) consensus	27.2199	2.39643e-07	9.95598e-05	0
LYa_b1_contig_21778 (1..246) consensus	27.1817	0.0504043	0	1
LYa_b1_contig_191387 (530..785) consensus	27.1817	0.0504069	0	1
LYa_b1_contig_133328 (34..441) consensus	27.1817	0.0504094	0	1
LYa_b1_contig_115067 (5..470) consensus	27.1817	0.0504124	0	1
LYa_b1_contig_212390 (49..534) consensus	27.1817	0.0504155	0	1
LYa_b1_contig_137258 (1..1028) consensus	27.1817	0.0504186	0	1
LYa_b1_contig_9166 (1..684) consensus	27.1711	8.30953e-06	0.00148843	1
LYa_b1_contig_81416 (27..340) consensus	27.0299	0.052492	0	1
LYa_b1_contig_181894 (1820..2081) consensus	26.976	0.0519431	0	1
LYa_b1_contig_42105 (18..528) consensus	26.976	0.0519208	0	1
LYa_b1_contig_110528 (657..1199) consensus	26.9211	0.0526571	0	1
LYa_b1_contig_126622 (1..884) consensus	26.8384	5.90595e-05	0.00658974	1
LYa_b1_contig_95426 (321..533) consensus	26.7141	0.0565244	0	1
LYa_b1_contig_83451 (299..716) consensus	26.7141	0.0565146	0	1
LYa_b1_contig_187208 (136..555) consensus	26.7141	0.0565056	0	1
LYa_b1_contig_102742 (2196..2647) consensus	26.7141	0.0565008	0	1
LYa_b1_contig_77775 (35..928) consensus	26.7141	0.056496	0	1
LYa_b1_contig_19570 (555..1497) consensus	26.7141	0.0565264	0	1
LYa_b1_contig_4264 (40..414) consensus	26.6597	0.0566659	0	1
LYa_b1_contig_296772 (1..403) consensus	26.6597	0.0566654	0	1
LYa_b1_contig_19913 (882..1368) consensus	26.6597	0.0566762	0	1
LYa_b1_contig_292537 (33..791) consensus	26.6597	0.056687	0	1
LYa_b1_contig_11821 (85..541) consensus	26.492	4.84953e-05	0.00570335	1
LYa_b1_contig_18759 (1..598) consensus	26.451	2.29632e-08	1.53549e-05	0
LYa_b1_contig_13038 (522..739) consensus	26.3974	0.0626785	0	1
LYa_b1_contig_32779 (206..458) consensus	26.3974	0.0626536	0	1
LYa_b1_contig_194566 (1416..1679) consensus	26.3974	0.0626287	0	1
LYa_b1_contig_383478 (32..312) consensus	26.3974	0.0626038	0	1
LYa_b1_contig_68191 (1..352) consensus	26.3974	0.0625985	0	1
LYa_b1_contig_297868 (38..405) consensus	26.3974	0.0625933	0	1
LYa_b1_contig_55989 (1..386) consensus	26.3974	0.062588	0	1
LYa_b1_contig_349603 (1..441) consensus	26.3974	0.0625799	0	1
LYa_b1_contig_351229 (57..583) consensus	26.3974	0.0625731	0	1
LYa_b1_contig_47409 (159..688) consensus	26.3974	0.0625716	0	1
LYa_b1_contig_149780 (7..586) consensus	26.3974	0.0625701	0	1
LYa_b1_contig_299185 (593..1220) consensus	26.3974	0.0625687	0	1
LYa_b1_contig_18293 (1..667) consensus	26.3974	0.0625617	0	1
LYa_b1_contig_197434 (1..712) consensus	26.3974	0.0625546	0	1
LYa_b1_contig_79947 (4..834) consensus	26.3974	0.06261	0	1
LYa_b1_contig_196882 (181..1030) consensus	26.3974	0.0626143	0	1
LYa_b1_contig_118086 (303..1651) consensus	26.3974	0.0626187	0	1
LYa_b1_contig_239 (394..1860) consensus	26.3974	0.0626231	0	1
LYa_b1_contig_68693 (4..711) consensus	26.3553	9.78168e-06	0.00170417	1
LYa_b1_contig_89716 (78..2305) consensus	26.1909	8.31015e-06	0.00148843	1
LYa_b1_contig_300645 (1..202) consensus	26.0856	0.0646184	0	1
LYa_b1_contig_147375 (1091..1313) consensus	26.0856	0.0646208	0	1
LYa_b1_contig_430270 (15..238) consensus	26.0856	0.0646187	0	1
LYa_b1_contig_123975 (1..237) consensus	26.0856	0.0646166	0	1
LYa_b1_contig_300632 (1..265) consensus	26.0856	0.0646263	0	1
LYa_b1_contig_37026 (124..391) consensus	26.0856	0.0646642	0	1
LYa_b1_contig_30166 (51..328) consensus	26.0856	0.0647021	0	1
LYa_b1_contig_400623 (146..423) consensus	26.0856	0.0647078	0	1
LYa_b1_contig_288021 (874..1154) consensus	26.0856	0.0647134	0	1
LYa_b1_contig_436483 (1..283) consensus	26.0856	0.0647191	0	1
LYa_b1_contig_136575 (1..304) consensus	26.0856	0.0647248	0	1
LYa_b1_contig_313988 (20..337) consensus	26.0856	0.0647218	0	1
LYa_b1_contig_106243 (1..324) consensus	26.0856	0.0647188	0	1
LYa_b1_contig_314103 (1..328) consensus	26.0856	0.0647283	0	1
LYa_b1_contig_33694 (218..591) consensus	26.0856	0.0647467	0	1
LYa_b1_contig_375522 (191..635) consensus	26.0856	0.0647486	0	1
LYa_b1_contig_48927 (35..756) consensus	26.0856	0.0647504	0	1
LYa_b1_contig_201465 (54..791) consensus	26.0856	0.0647523	0	1
LYa_b1_contig_114613 (147..1666) consensus	26.0856	0.064762	0	1
LYa_b1_contig_183542 (191..1107) consensus	26.05	9.81773e-05	0.00935296	1
LYa_b1_contig_181177 (124..379) consensus	26.0349	0.0588118	0	1
LYa_b1_contig_5582 (255..548) consensus	26.0349	0.0588278	0	1
LYa_b1_contig_425134 (10..304) consensus	26.0349	0.0588338	0	1
LYa_b1_contig_92758 (72..488) consensus	26.0349	0.0588398	0	1
LYa_b1_contig_288575 (271..858) consensus	26.0349	0.0588452	0	1
LYa_b1_contig_42450 (6..692) consensus	26.0349	0.0588469	0	1
LYa_b1_contig_157026 (1..370) consensus	26.0049	0.000971941	0	1
LYa_b1_contig_251020 (74..289) consensus	25.9832	0.0554122	0	1
LYa_b1_contig_301818 (123..420) consensus	25.9832	0.0554132	0	1
LYa_b1_contig_3546 (1..361) consensus	25.9832	0.0554191	0	1
LYa_b1_contig_360004 (125..496) consensus	25.9832	0.0554309	0	1
LYa_b1_contig_303448 (1..526) consensus	25.9832	0.0554439	0	1
LYa_b1_contig_78847 (3..260) consensus	25.9304	0.0536875	0	1
LYa_b1_contig_410593 (117..441) consensus	25.9304	0.0536732	0	1
LYa_b1_contig_88089 (22..426) consensus	25.9304	0.0536588	0	1
LYa_b1_contig_114227 (337..627) consensus	25.8766	0.0532372	0	1
LYa_b1_contig_99204 (115..479) consensus	25.8766	0.0532327	0	1
LYa_b1_contig_195908 (1..281) consensus	25.8216	0.0539235	0	1
LYa_b1_contig_17093 (191..549) consensus	25.8216	0.0539258	0	1
LYa_b1_contig_270431 (1..660) consensus	25.7755	0.0598176	0	1
LYa_b1_contig_145858 (74..1783) consensus	25.7755	0.0598255	0	1
LYa_b1_contig_236693 (146..356) consensus	25.7655	0.0560284	0	1
LYa_b1_contig_163842 (24..279) consensus	25.7655	0.056022	0	1
LYa_b1_contig_154976 (83..346) consensus	25.7655	0.0560155	0	1
LYa_b1_contig_151363 (83..371) consensus	25.7655	0.0560054	0	1
LYa_b1_contig_220424 (160..478) consensus	25.7655	0.0559952	0	1
LYa_b1_contig_40288 (926..1278) consensus	25.7655	0.0559851	0	1
LYa_b1_contig_34710 (13..396) consensus	25.7655	0.055975	0	1
LYa_b1_contig_140621 (1522..1946) consensus	25.7655	0.0559681	0	1
LYa_b1_contig_116894 (43..486) consensus	25.7655	0.0559596	0	1
LYa_b1_contig_79129 (538..1025) consensus	25.7655	0.0559512	0	1
LYa_b1_contig_49797 (1291..1959) consensus	25.7655	0.0559427	0	1
LYa_b1_contig_185850 (69..779) consensus	25.7655	0.0559574	0	1
LYa_b1_contig_259960 (146..368) consensus	25.7245	0.0554855	0	1
LYa_b1_contig_253250 (1..247) consensus	25.7245	0.0554805	0	1
LYa_b1_contig_149793 (461..803) consensus	25.7245	0.0554872	0	1
LYa_b1_contig_108499 (1..788) consensus	25.7245	0.0554724	0	1
LYa_b1_contig_202418 (75..386) consensus	25.719	0.00114938	0	1
LYa_b1_contig_298932 (66..361) consensus	25.7083	0.0598997	0	1
LYa_b1_contig_43143 (1..346) consensus	25.7083	0.0599312	0	1
LYa_b1_contig_44861 (135..503) consensus	25.7083	0.0599064	0	1
LYa_b1_contig_120759 (35..411) consensus	25.7083	0.0598816	0	1
LYa_b1_contig_78031 (25..411) consensus	25.7083	0.0598541	0	1
LYa_b1_contig_123228 (548..937) consensus	25.7083	0.0598459	0	1
LYa_b1_contig_140621 (920..1514) consensus	25.7083	0.0598371	0	1
LYa_b1_contig_73767 (4..626) consensus	25.7083	0.0598283	0	1
LYa_b1_contig_5467 (83..1188) consensus	25.6828	8.42812e-08	4.28802e-05	0
LYa_b1_contig_62592 (137..347) consensus	25.6501	0.0661805	0	1
LYa_b1_contig_220579 (664..898) consensus	25.6501	0.0662027	0	1
LYa_b1_contig_125043 (1..270) consensus	25.6501	0.0661988	0	1
LYa_b1_contig_7112 (202..522) consensus	25.6501	0.066195	0	1
LYa_b1_contig_350016 (4..333) consensus	25.6501	0.0661911	0	1
LYa_b1_contig_158846 (282..629) consensus	25.6501	0.0661889	0	1
LYa_b1_contig_124073 (52..461) consensus	25.6501	0.0661866	0	1
LYa_b1_contig_353921 (42..479) consensus	25.6501	0.06618	0	1
LYa_b1_contig_96205 (35..496) consensus	25.6501	0.0661733	0	1
LYa_b1_contig_234306 (1..464) consensus	25.6501	0.0661667	0	1
LYa_b1_contig_143052 (154..696) consensus	25.6501	0.0661601	0	1
LYa_b1_contig_422547 (1..548) consensus	25.6501	0.0661535	0	1
LYa_b1_contig_17590 (3707..4260) consensus	25.6501	0.0661469	0	1
LYa_b1_contig_327297 (348..924) consensus	25.6501	0.0661499	0	1
LYa_b1_contig_80532 (807..1416) consensus	25.6501	0.0661529	0	1
LYa_b1_contig_54151 (1067..1715) consensus	25.6501	0.0661559	0	1
LYa_b1_contig_33107 (12..812) consensus	25.6501	0.0661639	0	1
LYa_b1_contig_31388 (1784..3275) consensus	25.6501	0.0661584	0	1
LYa_b1_contig_117193 (1..209) consensus	25.619	0.0519233	0	1
LYa_b1_contig_103382 (1..308) consensus	25.619	0.051925	0	1
LYa_b1_contig_44688 (36..1422) consensus	25.5979	0.00191549	0	1
LYa_b1_contig_92494 (164..445) consensus	25.5646	0.0521091	0	1
LYa_b1_contig_65628 (28..260) consensus	25.5091	0.0534906	0	1
LYa_b1_contig_233510 (32..403) consensus	25.5091	0.0535022	0	1
LYa_b1_contig_69405 (35..553) consensus	25.5091	0.0535139	0	1
LYa_b1_contig_399712 (58..927) consensus	25.4894	0.000102187	0.00959372	1
LYa_b1_contig_121324 (27..239) consensus	25.4649	0.0572727	0	1
LYa_b1_contig_106038 (5..222) consensus	25.4649	0.0572958	0	1
LYa_b1_contig_21322 (439..724) consensus	25.4649	0.0573188	0	1
LYa_b1_contig_52744 (5..217) consensus	25.4525	0.0561914	0	1
LYa_b1_contig_51243 (54..339) consensus	25.4525	0.0562016	0	1
LYa_b1_contig_160466 (1..373) consensus	25.4525	0.0562277	0	1
LYa_b1_contig_163620 (2170..2420) consensus	25.4133	0.0537687	0	1
LYa_b1_contig_203733 (28..312) consensus	25.4133	0.0537612	0	1
LYa_b1_contig_159810 (1..208) consensus	25.3948	0.0608749	0	1
LYa_b1_contig_337717 (133..344) consensus	25.3948	0.0609136	0	1
LYa_b1_contig_394991 (212..435) consensus	25.3948	0.0609206	0	1
LYa_b1_contig_158387 (49..276) consensus	25.3948	0.0609277	0	1
LYa_b1_contig_110832 (95..513) consensus	25.3948	0.0609303	0	1
LYa_b1_contig_59400 (48..518) consensus	25.3948	0.0609279	0	1
LYa_b1_contig_13889 (8..1162) consensus	25.3806	0.000106714	0.00990578	1
LYa_b1_contig_173988 (752..1311) consensus	25.3607	0.0520561	0	1
LYa_b1_contig_142681 (14..214) consensus	25.3069	0.0516059	0	1
LYa_b1_contig_17679 (66..273) consensus	25.252	0.0522508	0	1
LYa_b1_contig_199765 (1..218) consensus	25.252	0.0522522	0	1
LYa_b1_contig_106876 (29..259) consensus	25.252	0.0522559	0	1
LYa_b1_contig_110055 (424..867) consensus	25.252	0.0522597	0	1
LYa_b1_contig_304725 (10..268) consensus	25.196	0.0541933	0	1
LYa_b1_contig_93013 (1..421) consensus	25.196	0.0542097	0	1
LYa_b1_contig_296221 (22..239) consensus	25.1536	0.0562406	0	1
LYa_b1_contig_246407 (46..310) consensus	25.1536	0.056233	0	1
LYa_b1_contig_352219 (26..304) consensus	25.1536	0.056232	0	1
LYa_b1_contig_196042 (258..469) consensus	25.1389	0.0580052	0	1
LYa_b1_contig_306362 (152..386) consensus	25.1389	0.0580026	0	1
LYa_b1_contig_443906 (58..705) consensus	25.1389	0.058	0	1
LYa_b1_contig_30234 (1..235) consensus	25.1211	0.00531238	0	1
LYa_b1_contig_149621 (118..829) consensus	25.1132	0.00242171	0	1
LYa_b1_contig_297775 (21..248) consensus	25.1016	0.0534236	0	1
LYa_b1_contig_134447 (18..362) consensus	25.1016	0.053425	0	1
LYa_b1_contig_5941 (85..575) consensus	25.1016	0.0534261	0	1
LYa_b1_contig_3489 (32..1042) consensus	25.1016	0.0534371	0	1
LYa_b1_contig_8470 (259..468) consensus	25.0484	0.0521535	0	1
LYa_b1_contig_224341 (1..269) consensus	25.0484	0.0521564	0	1
LYa_b1_contig_303361 (1..1129) consensus	25.0484	0.0521593	0	1
LYa_b1_contig_41810 (1..213) consensus	24.9941	0.0521405	0	1
LYa_b1_contig_331096 (85..301) consensus	24.9941	0.0521489	0	1
LYa_b1_contig_155161 (1..222) consensus	24.957	0.00155685	0	1
LYa_b1_contig_19212 (110..2201) consensus	24.9438	4.69025e-05	0.00557203	1
LYa_b1_contig_67511 (1..256) consensus	24.9387	0.0536166	0	1
LYa_b1_contig_230052 (30..433) consensus	24.9387	0.053613	0	1
LYa_b1_contig_422484 (1..697) consensus	24.9085	0.000578744	0.0325648	1
LYa_b1_contig_27646 (39..345) consensus	24.8822	0.0569846	0	1
LYa_b1_contig_403264 (137..515) consensus	24.8822	0.0569745	0	1
LYa_b1_contig_207596 (1..446) consensus	24.8822	0.0569559	0	1
LYa_b1_contig_436615 (564..1025) consensus	24.8822	0.0569374	0	1
LYa_b1_contig_20300 (3624..3858) consensus	24.8416	0.0562437	0	1
LYa_b1_contig_162609 (232..600) consensus	24.8416	0.0562391	0	1
LYa_b1_contig_90126 (19..1221) consensus	24.8232	0.00125609	0	1
LYa_b1_contig_181490 (481..697) consensus	24.7891	0.0538622	0	1
LYa_b1_contig_260997 (68..322) consensus	24.7891	0.0538645	0	1
LYa_b1_contig_57477 (1..358) consensus	24.7891	0.0538669	0	1
LYa_b1_contig_120689 (4..232) consensus	24.7354	0.0533915	0	1
LYa_b1_contig_112653 (1..246) consensus	24.7354	0.0533835	0	1
LYa_b1_contig_101703 (18..341) consensus	24.7354	0.0533755	0	1
LYa_b1_contig_77686 (367..998) consensus	24.7318	0.00607768	0	1
LYa_b1_contig_214491 (1..213) consensus	24.6807	0.0544277	0	1
LYa_b1_contig_124275 (586..829) consensus	24.6807	0.0544226	0	1
LYa_b1_contig_4101 (2315..2639) consensus	24.6807	0.0544176	0	1
LYa_b1_contig_382459 (1117..1360) consensus	24.6247	0.0568285	0	1
LYa_b1_contig_192384 (41..285) consensus	24.6247	0.0568285	0	1
LYa_b1_contig_98529 (1..1194) consensus	24.5798	4.43471e-06	0.000945411	1
LYa_b1_contig_88935 (1..852) consensus	24.5658	0.000463092	0.0285964	1
LYa_b1_contig_48647 (1..342) consensus	24.5647	0.000280467	0.0200938	1
LYa_b1_contig_26280 (351..589) consensus	24.529	0.057448	0	1
LYa_b1_contig_188509 (254..552) consensus	24.529	0.0574594	0	1
LYa_b1_contig_40863 (11..340) consensus	24.529	0.0574708	0	1
LYa_b1_contig_239740 (196..535) consensus	24.529	0.0574726	0	1
LYa_b1_contig_95324 (1..479) consensus	24.529	0.0574744	0	1
LYa_b1_contig_72853 (1354..1982) consensus	24.529	0.0574762	0	1
LYa_b1_contig_11110 (2449..2835) consensus	24.476	0.0560849	0	1
LYa_b1_contig_169905 (44..455) consensus	24.4218	0.0560902	0	1
LYa_b1_contig_59912 (110..660) consensus	24.4218	0.0560941	0	1
LYa_b1_contig_148398 (15..312) consensus	24.3665	0.0580036	0	1
LYa_b1_contig_144071 (2358..2666) consensus	24.3665	0.058001	0	1
LYa_b1_contig_198619 (1194..1540) consensus	24.3665	0.0579949	0	1
LYa_b1_contig_24832 (17..408) consensus	24.3665	0.0579888	0	1
LYa_b1_contig_303645 (1..546) consensus	24.3665	0.0579828	0	1
LYa_b1_contig_400982 (70..684) consensus	24.3665	0.0579846	0	1
LYa_b1_contig_95887 (15..552) consensus	24.2814	0.00132313	0	1
LYa_b1_contig_62900 (732..1844) consensus	24.2406	0.00290798	0	1
LYa_b1_contig_83235 (34..260) consensus	24.2156	0.0602432	0	1
LYa_b1_contig_180275 (1126..1377) consensus	24.2156	0.0602621	0	1
LYa_b1_contig_133075 (34..289) consensus	24.2156	0.0602645	0	1
LYa_b1_contig_239916 (1..266) consensus	24.2156	0.060267	0	1
LYa_b1_contig_125997 (1043..1375) consensus	24.2156	0.0602694	0	1
LYa_b1_contig_30302 (132..764) consensus	24.2156	0.0602751	0	1
LYa_b1_contig_44034 (1..1571) consensus	24.193	6.47268e-05	0.00695834	1
LYa_b1_contig_72313 (14..366) consensus	24.1621	0.0593724	0	1
LYa_b1_contig_168764 (2048..2469) consensus	24.1621	0.0593697	0	1
LYa_b1_contig_81037 (9..909) consensus	24.1258	1.13621e-05	0.00187705	1
LYa_b1_contig_199570 (494..697) consensus	24.1074	0.0607385	0	1
LYa_b1_contig_103202 (46..385) consensus	24.1074	0.0607406	0	1
LYa_b1_contig_18221 (1003..1828) consensus	24.1074	0.0607427	0	1
LYa_b1_contig_381936 (352..1224) consensus	24.1074	0.060751	0	1
LYa_b1_contig_3316 (1..898) consensus	24.0572	0.000224907	0.0169978	1
LYa_b1_contig_4619 (30..1440) consensus	24.0374	3.74455e-09	3.32796e-06	0
LYa_b1_contig_173398 (17..254) consensus	23.9016	0.0650548	0	1
LYa_b1_contig_108132 (20..270) consensus	23.9016	0.0650308	0	1
LYa_b1_contig_452855 (1..268) consensus	23.9016	0.0650068	0	1
LYa_b1_contig_56618 (1699..1999) consensus	23.9016	0.0650103	0	1
LYa_b1_contig_96673 (3..566) consensus	23.9016	0.0650137	0	1
LYa_b1_contig_300598 (574..907) consensus	23.8475	0.0648185	0	1
LYa_b1_contig_92923 (677..1055) consensus	23.8475	0.0648294	0	1
LYa_b1_contig_48881 (1..327) consensus	23.8426	7.4647e-09	5.88881e-06	0
LYa_b1_contig_238606 (19..251) consensus	23.5867	0.0725834	0	1
LYa_b1_contig_190760 (4..244) consensus	23.5867	0.0725772	0	1
LYa_b1_contig_17963 (62..313) consensus	23.5867	0.0725833	0	1
LYa_b1_contig_20689 (618..898) consensus	23.5867	0.0725894	0	1
LYa_b1_contig_27258 (163..447) consensus	23.5867	0.0725956	0	1
LYa_b1_contig_195331 (306..612) consensus	23.5867	0.0725936	0	1
LYa_b1_contig_111416 (1146..1467) consensus	23.5867	0.0725916	0	1
LYa_b1_contig_33832 (1925..2257) consensus	23.5867	0.0725714	0	1
LYa_b1_contig_423177 (328..714) consensus	23.5867	0.0725511	0	1
LYa_b1_contig_412594 (282..727) consensus	23.5867	0.0725414	0	1
LYa_b1_contig_152147 (12..523) consensus	23.5867	0.0725316	0	1
LYa_b1_contig_32074 (1522..2174) consensus	23.5867	0.072533	0	1
LYa_b1_contig_186580 (1146..1832) consensus	23.5867	0.0725343	0	1
LYa_b1_contig_315119 (30..843) consensus	23.5867	0.0725357	0	1
LYa_b1_contig_30165 (76..732) consensus	23.4678	2.15626e-08	1.45571e-05	0
LYa_b1_contig_27249 (86..596) consensus	23.3443	0.00658011	0	1
LYa_b1_contig_77422 (1..804) consensus	23.2955	3.36113e-08	2.10343e-05	0
LYa_b1_contig_346845 (6..229) consensus	23.2428	0.00151213	0	1
LYa_b1_contig_139306 (896..1338) consensus	23.2058	0.00593001	0	1
LYa_b1_contig_47018 (796..1872) consensus	23.1702	5.48657e-11	1.07031e-07	0
LYa_b1_contig_264252 (31..236) consensus	22.9486	0.0738095	0	1
LYa_b1_contig_119017 (20..227) consensus	22.9486	0.0737802	0	1
LYa_b1_contig_94509 (9..228) consensus	22.9486	0.073751	0	1
LYa_b1_contig_383842 (5..227) consensus	22.9486	0.0737572	0	1
LYa_b1_contig_85499 (1..229) consensus	22.9486	0.0737743	0	1
LYa_b1_contig_203730 (1..235) consensus	22.9486	0.0737914	0	1
LYa_b1_contig_101490 (29..282) consensus	22.9486	0.0738086	0	1
LYa_b1_contig_168777 (1..267) consensus	22.9486	0.0738257	0	1
LYa_b1_contig_44467 (1149..1433) consensus	22.9486	0.0738428	0	1
LYa_b1_contig_185742 (2..292) consensus	22.9486	0.0738604	0	1
LYa_b1_contig_150160 (1..330) consensus	22.9486	0.0738779	0	1
LYa_b1_contig_350243 (242..578) consensus	22.9486	0.0738955	0	1
LYa_b1_contig_357869 (43..395) consensus	22.9486	0.0738882	0	1
LYa_b1_contig_14128 (130..499) consensus	22.9486	0.0738891	0	1
LYa_b1_contig_307275 (39..457) consensus	22.9486	0.07389	0	1
LYa_b1_contig_26013 (2086..2523) consensus	22.9486	0.0738909	0	1
LYa_b1_contig_383608 (2..443) consensus	22.9486	0.0738918	0	1
LYa_b1_contig_17089 (106..593) consensus	22.9486	0.0738927	0	1
LYa_b1_contig_135657 (13..563) consensus	22.9486	0.0738997	0	1
LYa_b1_contig_206484 (24..633) consensus	22.9486	0.0738899	0	1
LYa_b1_contig_388717 (256..902) consensus	22.9486	0.0738802	0	1
LYa_b1_contig_79349 (9..673) consensus	22.9486	0.073897	0	1
LYa_b1_contig_25334 (1..728) consensus	22.9486	0.0739279	0	1
LYa_b1_contig_101256 (694..1476) consensus	22.9486	0.0739588	0	1
LYa_b1_contig_116521 (123..1323) consensus	22.9486	0.0739542	0	1
LYa_b1_contig_16576 (275..516) consensus	22.929	0.00288379	0	1
LYa_b1_contig_177026 (1..214) consensus	22.8982	0.0674987	0	1
LYa_b1_contig_209461 (1..252) consensus	22.8982	0.0675178	0	1
LYa_b1_contig_114093 (1..349) consensus	22.8982	0.067537	0	1
LYa_b1_contig_288575 (1376..1757) consensus	22.8982	0.0675414	0	1
LYa_b1_contig_176138 (432..1640) consensus	22.8908	0.00648548	0	1
LYa_b1_contig_73090 (1..318) consensus	22.8465	0.0641537	0	1
LYa_b1_contig_20175 (344..691) consensus	22.8465	0.064146	0	1
LYa_b1_contig_54990 (1..411) consensus	22.8465	0.0641384	0	1
LYa_b1_contig_383128 (1..209) consensus	22.7937	0.0626744	0	1
LYa_b1_contig_111919 (146..365) consensus	22.7937	0.0626824	0	1
LYa_b1_contig_199328 (528..818) consensus	22.7937	0.0626904	0	1
LYa_b1_contig_65220 (201..567) consensus	22.7937	0.0626984	0	1
LYa_b1_contig_302623 (16..433) consensus	22.7937	0.0627064	0	1
LYa_b1_contig_244479 (1115..1618) consensus	22.7937	0.0627119	0	1
LYa_b1_contig_62590 (486..1279) consensus	22.7937	0.0627174	0	1
LYa_b1_contig_82619 (215..1029) consensus	22.7937	0.0627154	0	1
LYa_b1_contig_326005 (45..366) consensus	22.7396	0.062892	0	1
LYa_b1_contig_172588 (261..628) consensus	22.7396	0.0628812	0	1
LYa_b1_contig_38778 (32..330) consensus	22.7018	0.000681995	0.0365135	1
LYa_b1_contig_36743 (9..218) consensus	22.6843	0.0647688	0	1
LYa_b1_contig_212154 (68..507) consensus	22.6843	0.064768	0	1
LYa_b1_contig_177887 (18..237) consensus	22.6403	0.0688404	0	1
LYa_b1_contig_132250 (114..527) consensus	22.6403	0.0688377	0	1
LYa_b1_contig_25400 (2137..2611) consensus	22.6403	0.068835	0	1
LYa_b1_contig_360114 (1..219) consensus	22.6278	0.0687935	0	1
LYa_b1_contig_136071 (376..601) consensus	22.6278	0.0687743	0	1
LYa_b1_contig_195645 (7..256) consensus	22.6278	0.0687551	0	1
LYa_b1_contig_155100 (1..321) consensus	22.6278	0.0687454	0	1
LYa_b1_contig_31317 (45..787) consensus	22.6278	0.0687271	0	1
LYa_b1_contig_399844 (1775..2632) consensus	22.6278	0.0687087	0	1
LYa_b1_contig_66057 (17..1254) consensus	22.6278	0.0686904	0	1
LYa_b1_contig_452551 (38..239) consensus	22.5894	0.0641976	0	1
LYa_b1_contig_328608 (72..342) consensus	22.5894	0.0641792	0	1
LYa_b1_contig_106043 (29..324) consensus	22.5894	0.0641608	0	1
LYa_b1_contig_246722 (4..425) consensus	22.5894	0.0641596	0	1
LYa_b1_contig_50825 (415..626) consensus	22.57	0.0764453	0	1
LYa_b1_contig_451589 (344..584) consensus	22.57	0.0764401	0	1
LYa_b1_contig_108904 (2366..2616) consensus	22.57	0.0764442	0	1
LYa_b1_contig_186090 (107..363) consensus	22.57	0.0764245	0	1
LYa_b1_contig_316322 (555..813) consensus	22.57	0.0764048	0	1
LYa_b1_contig_176597 (347..608) consensus	22.57	0.076385	0	1
LYa_b1_contig_201452 (1..266) consensus	22.57	0.0764141	0	1
LYa_b1_contig_23939 (68..357) consensus	22.57	0.0764431	0	1
LYa_b1_contig_4298 (742..1070) consensus	22.57	0.0764721	0	1
LYa_b1_contig_443939 (1304..1635) consensus	22.57	0.0765011	0	1
LYa_b1_contig_308915 (1583..1938) consensus	22.57	0.0764603	0	1
LYa_b1_contig_351143 (142..619) consensus	22.57	0.0764195	0	1
LYa_b1_contig_399383 (48..552) consensus	22.57	0.0763787	0	1
LYa_b1_contig_142567 (1026..1537) consensus	22.57	0.076338	0	1
LYa_b1_contig_20505 (779..1331) consensus	22.57	0.0762992	0	1
LYa_b1_contig_232857 (601..1161) consensus	22.57	0.0762604	0	1
LYa_b1_contig_69524 (963..1588) consensus	22.57	0.0762216	0	1
LYa_b1_contig_19594 (926..1754) consensus	22.57	0.0762034	0	1
LYa_b1_contig_246399 (1948..2836) consensus	22.57	0.0761851	0	1
LYa_b1_contig_112906 (578..988) consensus	22.5482	0.00730806	0	1
LYa_b1_contig_121436 (150..389) consensus	22.5372	0.0619537	0	1
LYa_b1_contig_452517 (17..259) consensus	22.5372	0.0619555	0	1
LYa_b1_contig_163000 (14..267) consensus	22.5372	0.0619572	0	1
LYa_b1_contig_233084 (18..317) consensus	22.5372	0.061959	0	1
LYa_b1_contig_68819 (3..356) consensus	22.5372	0.0619607	0	1
LYa_b1_contig_90666 (135..579) consensus	22.5372	0.0619536	0	1
LYa_b1_contig_194558 (968..1188) consensus	22.4838	0.061405	0	1
LYa_b1_contig_86162 (6..268) consensus	22.4838	0.0613944	0	1
LYa_b1_contig_206828 (445..740) consensus	22.4838	0.0613838	0	1
LYa_b1_contig_137216 (340..654) consensus	22.4838	0.0613732	0	1
LYa_b1_contig_21862 (443..768) consensus	22.4838	0.0613668	0	1
LYa_b1_contig_126226 (1..591) consensus	22.4838	0.0613605	0	1
LYa_b1_contig_20763 (1..575) consensus	22.4741	0.00160973	0	1
LYa_b1_contig_38738 (6..206) consensus	22.4292	0.0625507	0	1
LYa_b1_contig_451736 (38..255) consensus	22.4292	0.062542	0	1
LYa_b1_contig_146058 (638..869) consensus	22.4292	0.0625363	0	1
LYa_b1_contig_69133 (1..251) consensus	22.4292	0.0625307	0	1
LYa_b1_contig_250951 (198..562) consensus	22.4292	0.062525	0	1
LYa_b1_contig_154459 (1..505) consensus	22.4292	0.0625193	0	1
LYa_b1_contig_42920 (15..574) consensus	22.4292	0.0625136	0	1
LYa_b1_contig_154080 (402..602) consensus	22.3733	0.0654673	0	1
LYa_b1_contig_181530 (64..268) consensus	22.3733	0.0654731	0	1
LYa_b1_contig_135898 (36..348) consensus	22.3733	0.0654789	0	1
LYa_b1_contig_92536 (114..588) consensus	22.3591	0.000210262	0.0161213	1
LYa_b1_contig_90672 (1..447) consensus	22.3452	0.0015415	0	1
LYa_b1_contig_263457 (1..211) consensus	22.3313	0.0665037	0	1
LYa_b1_contig_214045 (66..293) consensus	22.3313	0.0665029	0	1
LYa_b1_contig_222519 (45..317) consensus	22.3313	0.0664914	0	1
LYa_b1_contig_349686 (151..687) consensus	22.3313	0.0664798	0	1
LYa_b1_contig_117774 (723..942) consensus	22.3161	0.0704489	0	1
LYa_b1_contig_32435 (2188..2463) consensus	22.3161	0.0704557	0	1
LYa_b1_contig_441198 (13..313) consensus	22.3161	0.0704624	0	1
LYa_b1_contig_179494 (29..436) consensus	22.3161	0.0704691	0	1
LYa_b1_contig_91211 (211..636) consensus	22.3161	0.0704757	0	1
LYa_b1_contig_42717 (3044..3888) consensus	22.3161	0.0704932	0	1
LYa_b1_contig_80179 (43..274) consensus	22.2799	0.0629904	0	1
LYa_b1_contig_182162 (1..204) consensus	22.2272	0.0617143	0	1
LYa_b1_contig_278293 (12..236) consensus	22.2272	0.0617066	0	1
LYa_b1_contig_35552 (1..232) consensus	22.2272	0.061699	0	1
LYa_b1_contig_243102 (2..274) consensus	22.2272	0.0616978	0	1
LYa_b1_contig_124270 (20..1058) consensus	22.2272	0.0616966	0	1
LYa_b1_contig_93126 (342..630) consensus	22.1732	0.0619263	0	1
LYa_b1_contig_94648 (23..349) consensus	22.1732	0.0619382	0	1
LYa_b1_contig_220328 (135..466) consensus	22.1732	0.0619424	0	1
LYa_b1_contig_193660 (250..590) consensus	22.1732	0.0619466	0	1
LYa_b1_contig_6772 (64..1551) consensus	22.1654	9.73457e-08	4.71361e-05	0
LYa_b1_contig_248934 (51..1540) consensus	22.1541	1.10195e-06	0.000327835	0
LYa_b1_contig_36244 (564..1062) consensus	22.1413	0.00292786	0	1
LYa_b1_contig_43871 (1..389) consensus	22.1234	0.000422368	0.0266396	1
LYa_b1_contig_33990 (1296..1696) consensus	22.118	0.0635337	0	1
LYa_b1_contig_116526 (53..587) consensus	22.118	0.0635447	0	1
LYa_b1_contig_67025 (1..209) consensus	22.0615	0.0671595	0	1
LYa_b1_contig_111478 (67..493) consensus	22.0615	0.0671455	0	1
LYa_b1_contig_117720 (58..578) consensus	22.0393	0.000209573	0.0161213	1
LYa_b1_contig_286206 (35..293) consensus	22.0217	0.0662135	0	1
LYa_b1_contig_188716 (273..549) consensus	22.0217	0.0662074	0	1
LYa_b1_contig_19982 (115..459) consensus	22.0217	0.0662014	0	1
LYa_b1_contig_131238 (15..365) consensus	22.0217	0.0662056	0	1
LYa_b1_contig_177270 (583..979) consensus	22.0217	0.0662098	0	1
LYa_b1_contig_93124 (45..485) consensus	22.0217	0.0662082	0	1
LYa_b1_contig_102742 (1238..1864) consensus	22.0217	0.0662067	0	1
LYa_b1_contig_27661 (657..1345) consensus	22.0217	0.0662051	0	1
LYa_b1_contig_71596 (53..720) consensus	21.9947	0.0024304	0.0846679	1
LYa_b1_contig_364342 (27..363) consensus	21.98	0.00355547	0	1
LYa_b1_contig_44775 (1..203) consensus	21.9697	0.0634202	0	1
LYa_b1_contig_62645 (1..223) consensus	21.9697	0.0634247	0	1
LYa_b1_contig_29388 (1..265) consensus	21.9697	0.0634285	0	1
LYa_b1_contig_178610 (9..275) consensus	21.9697	0.0634323	0	1
LYa_b1_contig_29768 (3..282) consensus	21.9697	0.0634465	0	1
LYa_b1_contig_174605 (339..829) consensus	21.9218	1.94152e-06	0.000493899	0
LYa_b1_contig_134800 (8..252) consensus	21.9164	0.0623937	0	1
LYa_b1_contig_453199 (33..322) consensus	21.9164	0.0624114	0	1
LYa_b1_contig_34714 (59..638) consensus	21.9164	0.062429	0	1
LYa_b1_contig_76202 (15..216) consensus	21.8619	0.0634417	0	1
LYa_b1_contig_156146 (109..319) consensus	21.8619	0.0634449	0	1
LYa_b1_contig_184972 (1..224) consensus	21.8619	0.0634481	0	1
LYa_b1_contig_119310 (1..269) consensus	21.8619	0.0634504	0	1
LYa_b1_contig_110822 (30..327) consensus	21.8619	0.0634528	0	1
LYa_b1_contig_84448 (1..307) consensus	21.8619	0.0634552	0	1
LYa_b1_contig_149989 (104..411) consensus	21.8619	0.0634381	0	1
LYa_b1_contig_45923 (454..838) consensus	21.8619	0.063416	0	1
LYa_b1_contig_77781 (204..640) consensus	21.8619	0.0633938	0	1
LYa_b1_contig_145451 (398..617) consensus	21.8061	0.0668117	0	1
LYa_b1_contig_69486 (66..303) consensus	21.8061	0.066807	0	1
LYa_b1_contig_14610 (23..317) consensus	21.8061	0.0668023	0	1
LYa_b1_contig_98241 (18..325) consensus	21.8061	0.0667835	0	1
LYa_b1_contig_189803 (27..465) consensus	21.8061	0.0667647	0	1
LYa_b1_contig_297153 (1..271) consensus	21.7461	0.00360317	0	1
LYa_b1_contig_27178 (871..1072) consensus	21.7114	0.0666459	0	1
LYa_b1_contig_114508 (2..204) consensus	21.7114	0.0666464	0	1
LYa_b1_contig_138238 (19..222) consensus	21.7114	0.0666468	0	1
LYa_b1_contig_120067 (94..369) consensus	21.7114	0.0666472	0	1
LYa_b1_contig_51493 (3..305) consensus	21.7114	0.0666576	0	1
LYa_b1_contig_300023 (319..643) consensus	21.7114	0.0666679	0	1
LYa_b1_contig_177510 (69..520) consensus	21.7114	0.0666783	0	1
LYa_b1_contig_212900 (220..715) consensus	21.7114	0.0666886	0	1
LYa_b1_contig_116050 (1..329) consensus	21.6873	8.60917e-07	0.000277275	0
LYa_b1_contig_300307 (1..351) consensus	21.6678	3.68556e-09	3.31753e-06	0
LYa_b1_contig_38598 (388..596) consensus	21.6588	0.0648342	0	1
LYa_b1_contig_72396 (37..258) consensus	21.6588	0.0648297	0	1
LYa_b1_contig_34737 (34..277) consensus	21.6588	0.0648258	0	1
LYa_b1_contig_17206 (1471..1773) consensus	21.6588	0.0648219	0	1
LYa_b1_contig_364338 (19..330) consensus	21.6588	0.0648179	0	1
LYa_b1_contig_53389 (4714..5081) consensus	21.6588	0.064814	0	1
LYa_b1_contig_3248 (361..838) consensus	21.6588	0.0648101	0	1
LYa_b1_contig_51724 (145..1317) consensus	21.6588	0.0648061	0	1
LYa_b1_contig_36654 (1..484) consensus	21.6555	4.51996e-06	0.000955876	1
LYa_b1_contig_303883 (10..228) consensus	21.605	0.0652443	0	1
LYa_b1_contig_385177 (1..262) consensus	21.605	0.0652442	0	1
LYa_b1_contig_144935 (147..510) consensus	21.605	0.0652441	0	1
LYa_b1_contig_72351 (1212..1678) consensus	21.605	0.0652381	0	1
LYa_b1_contig_121515 (186..686) consensus	21.605	0.0652321	0	1
LYa_b1_contig_63233 (1..375) consensus	21.5983	0.00272539	0	1
LYa_b1_contig_197320 (39..272) consensus	21.5499	0.06748	0	1
LYa_b1_contig_179490 (1..253) consensus	21.5499	0.0674833	0	1
LYa_b1_contig_266122 (71..366) consensus	21.5499	0.0674916	0	1
LYa_b1_contig_35091 (5..312) consensus	21.5499	0.0674999	0	1
LYa_b1_contig_95937 (1..671) consensus	21.5153	0.00289461	0	1
LYa_b1_contig_130904 (1122..1800) consensus	21.4206	0.00223644	0	1
LYa_b1_contig_232114 (62..267) consensus	21.4003	0.0697118	0	1
LYa_b1_contig_422484 (703..1057) consensus	21.3878	0.00104614	0.0484638	1
LYa_b1_contig_281135 (9..226) consensus	21.3472	0.0684691	0	1
LYa_b1_contig_71837 (14..367) consensus	21.3472	0.0684901	0	1
LYa_b1_contig_311592 (11..791) consensus	21.3022	0.000396687	0.0255521	1
LYa_b1_contig_78112 (1..210) consensus	21.2927	0.0699627	0	1
LYa_b1_contig_326975 (1..211) consensus	21.2927	0.0699625	0	1
LYa_b1_contig_121186 (56..270) consensus	21.2927	0.0699695	0	1
LYa_b1_contig_286394 (58..324) consensus	21.2927	0.0699765	0	1
LYa_b1_contig_136550 (155..459) consensus	21.2927	0.0699944	0	1
LYa_b1_contig_139874 (24..351) consensus	21.2927	0.0700124	0	1
LYa_b1_contig_156242 (98..454) consensus	21.2927	0.0700303	0	1
LYa_b1_contig_14050 (1..360) consensus	21.2671	0.00165088	0.0658023	1
LYa_b1_contig_1598 (1..770) consensus	21.1787	4.03651e-06	0.000880147	1
LYa_b1_contig_17432 (17..739) consensus	21.1517	0.000149826	0.0127354	1
LYa_b1_contig_250769 (1..242) consensus	21.1498	0.000554865	0.0317526	1
LYa_b1_contig_33193 (51..421) consensus	21.1413	0.00916321	0	1
LYa_b1_contig_160839 (1..621) consensus	21.0962	0.000295768	0.020697	1
LYa_b1_contig_261652 (679..2033) consensus	21.0909	0.0108071	0	1
LYa_b1_contig_24703 (24..231) consensus	21.0884	0.0745271	0	1
LYa_b1_contig_354928 (41..248) consensus	21.0884	0.0745166	0	1
LYa_b1_contig_91542 (698..924) consensus	21.0884	0.074506	0	1
LYa_b1_contig_262571 (513..743) consensus	21.0884	0.0744947	0	1
LYa_b1_contig_452936 (64..341) consensus	21.0884	0.0744835	0	1
LYa_b1_contig_44062 (10..379) consensus	21.0884	0.0744722	0	1
LYa_b1_contig_27290 (1..399) consensus	21.0884	0.0744609	0	1
LYa_b1_contig_155179 (1..407) consensus	21.0884	0.0744496	0	1
LYa_b1_contig_98324 (1..476) consensus	21.0872	0.000536689	0.0311417	1
LYa_b1_contig_248717 (1..204) consensus	21.0347	0.0744717	0	1
LYa_b1_contig_41420 (1..210) consensus	21.0347	0.0744717	0	1
LYa_b1_contig_147612 (38..346) consensus	21.0347	0.0744687	0	1
LYa_b1_contig_196097 (64..375) consensus	21.0347	0.0744657	0	1
LYa_b1_contig_56901 (4..316) consensus	21.0347	0.0744627	0	1
LYa_b1_contig_88683 (272..767) consensus	21.0347	0.0744597	0	1
LYa_b1_contig_11376 (1282..1798) consensus	21.0347	0.0744567	0	1
LYa_b1_contig_146268 (36..604) consensus	21.0347	0.0744514	0	1
LYa_b1_contig_298267 (1..336) consensus	20.9321	0.00846514	0	1
LYa_b1_contig_139699 (37..1894) consensus	20.8984	0.00470107	0	1
LYa_b1_contig_15702 (72..1353) consensus	20.8583	1.35785e-05	0.00215693	1
LYa_b1_contig_444755 (97..470) consensus	20.8301	0.000488063	0.0296543	1
LYa_b1_contig_13038 (1881..2089) consensus	20.7758	0.0830419	0	1
LYa_b1_contig_149833 (78..288) consensus	20.7758	0.0830463	0	1
LYa_b1_contig_247644 (25..255) consensus	20.7758	0.0830506	0	1
LYa_b1_contig_149978 (410..663) consensus	20.7758	0.0830541	0	1
LYa_b1_contig_64853 (6..268) consensus	20.7758	0.0830577	0	1
LYa_b1_contig_68410 (189..453) consensus	20.7758	0.0830417	0	1
LYa_b1_contig_24224 (1..266) consensus	20.7758	0.0830258	0	1
LYa_b1_contig_156042 (1..274) consensus	20.7758	0.0830054	0	1
LYa_b1_contig_157858 (37..329) consensus	20.7758	0.0829851	0	1
LYa_b1_contig_47704 (1637..1931) consensus	20.7758	0.0829647	0	1
LYa_b1_contig_99570 (1..323) consensus	20.7758	0.0829664	0	1
LYa_b1_contig_151817 (358..702) consensus	20.7758	0.0829681	0	1
LYa_b1_contig_413250 (1..376) consensus	20.7758	0.0829697	0	1
LYa_b1_contig_206023 (999..1385) consensus	20.7758	0.0829755	0	1
LYa_b1_contig_191387 (65..454) consensus	20.7758	0.0829812	0	1
LYa_b1_contig_76643 (73..532) consensus	20.7758	0.0829869	0	1
LYa_b1_contig_248704 (1..474) consensus	20.7758	0.0829899	0	1
LYa_b1_contig_81656 (16..504) consensus	20.7758	0.0829928	0	1
LYa_b1_contig_21791 (38..663) consensus	20.7758	0.0829958	0	1
LYa_b1_contig_296077 (1..631) consensus	20.7758	0.0829987	0	1
LYa_b1_contig_32441 (809..1451) consensus	20.7758	0.0830016	0	1
LYa_b1_contig_53290 (620..1267) consensus	20.7758	0.0829903	0	1
LYa_b1_contig_13321 (856..1346) consensus	20.7231	0.00121458	0.0534987	1
LYa_b1_contig_2214 (66..900) consensus	20.6987	0.000756289	0.039044	1
LYa_b1_contig_69350 (51..690) consensus	20.6717	0.00257794	0	1
LYa_b1_contig_164840 (20..898) consensus	20.6269	0.00311303	0	1
LYa_b1_contig_60461 (1..311) consensus	20.6229	0.00883205	0	1
LYa_b1_contig_113279 (1..847) consensus	20.594	0.000187384	0.014866	1
LYa_b1_contig_27850 (559..1944) consensus	20.5611	1.01736e-05	0.00175936	1
LYa_b1_contig_52339 (310..5703) consensus	20.5081	0.000164651	0.0136003	1
LYa_b1_contig_121759 (14..1419) consensus	20.4659	8.52687e-06	0.00152336	1
LYa_b1_contig_89690 (1..1437) consensus	20.4528	7.18739e-06	0.00134705	1
LYa_b1_contig_216000 (1..581) consensus	20.4449	1.16529e-06	0.000340901	0
LYa_b1_contig_16506 (210..2010) consensus	20.2894	0.000799038	0.0403316	1
LYa_b1_contig_95589 (1..2136) consensus	20.2836	2.50875e-07	0.000103613	0
LYa_b1_contig_208874 (35..375) consensus	20.2282	0.000916549	0.0443806	1
LYa_b1_contig_67628 (655..1594) consensus	20.1676	0.000169779	0.0138609	1
LYa_b1_contig_34606 (1334..2216) consensus	20.1289	1.79808e-06	0.000465848	0
LYa_b1_contig_2947 (4..388) consensus	20.1116	0.0134014	0	1
LYa_b1_contig_384485 (61..480) consensus	20.0905	0.00795402	0	1
LYa_b1_contig_19416 (28..486) consensus	20.0411	1.6936e-05	0.00251926	1
LYa_b1_contig_106573 (158..1364) consensus	19.9796	0.00135619	0.0575344	1
LYa_b1_contig_84241 (15..700) consensus	19.8673	0.0111757	0	1
LYa_b1_contig_1249 (49..547) consensus	19.8232	5.43851e-06	0.00107562	1
LYa_b1_contig_129774 (42..253) consensus	19.8118	0.0866675	0	1
LYa_b1_contig_422377 (168..380) consensus	19.8118	0.0866814	0	1
LYa_b1_contig_286625 (170..398) consensus	19.8118	0.0866953	0	1
LYa_b1_contig_70314 (6..235) consensus	19.8118	0.0867092	0	1
LYa_b1_contig_8586 (1..233) consensus	19.8118	0.0867198	0	1
LYa_b1_contig_305168 (13..246) consensus	19.8118	0.0867305	0	1
LYa_b1_contig_22422 (14..252) consensus	19.8118	0.0867411	0	1
LYa_b1_contig_353812 (27..266) consensus	19.8118	0.0867846	0	1
LYa_b1_contig_305422 (20..263) consensus	19.8118	0.0868279	0	1
LYa_b1_contig_94426 (46..291) consensus	19.8118	0.0868713	0	1
LYa_b1_contig_398812 (426..678) consensus	19.8118	0.0869146	0	1
LYa_b1_contig_430315 (60..313) consensus	19.8118	0.0869578	0	1
LYa_b1_contig_129956 (1..258) consensus	19.8118	0.087001	0	1
LYa_b1_contig_17287 (1041..1310) consensus	19.8118	0.0870442	0	1
LYa_b1_contig_98824 (80..366) consensus	19.8118	0.0870757	0	1
LYa_b1_contig_225025 (44..334) consensus	19.8118	0.0871072	0	1
LYa_b1_contig_32568 (37..358) consensus	19.8118	0.087123	0	1
LYa_b1_contig_262338 (9..335) consensus	19.8118	0.0871388	0	1
LYa_b1_contig_19318 (26..359) consensus	19.8118	0.0871546	0	1
LYa_b1_contig_104781 (175..519) consensus	19.8118	0.0871704	0	1
LYa_b1_contig_362224 (1..351) consensus	19.8118	0.0871862	0	1
LYa_b1_contig_399442 (35..386) consensus	19.8118	0.0872019	0	1
LYa_b1_contig_235596 (1..362) consensus	19.8118	0.0872292	0	1
LYa_b1_contig_20876 (5..395) consensus	19.8118	0.0872565	0	1
LYa_b1_contig_89061 (136..543) consensus	19.8118	0.0872743	0	1
LYa_b1_contig_131486 (320..733) consensus	19.8118	0.0872921	0	1
LYa_b1_contig_219114 (20..443) consensus	19.8118	0.0873099	0	1
LYa_b1_contig_80477 (1..432) consensus	19.8118	0.0873148	0	1
LYa_b1_contig_111982 (15..459) consensus	19.8118	0.0873198	0	1
LYa_b1_contig_298481 (22..472) consensus	19.8118	0.0873247	0	1
LYa_b1_contig_88841 (43..510) consensus	19.8118	0.0873296	0	1
LYa_b1_contig_261652 (4144..4626) consensus	19.8118	0.0873346	0	1
LYa_b1_contig_88417 (88..599) consensus	19.8118	0.0873395	0	1
LYa_b1_contig_349780 (1022..1533) consensus	19.8118	0.0873642	0	1
LYa_b1_contig_296156 (3..520) consensus	19.8118	0.0873889	0	1
LYa_b1_contig_47478 (178..700) consensus	19.8118	0.0874135	0	1
LYa_b1_contig_239064 (32..640) consensus	19.8118	0.0874382	0	1
LYa_b1_contig_142130 (463..1087) consensus	19.8118	0.0874628	0	1
LYa_b1_contig_222687 (178..838) consensus	19.8118	0.0874756	0	1
LYa_b1_contig_98209 (717..1564) consensus	19.8118	0.0874884	0	1
LYa_b1_contig_202507 (63..932) consensus	19.8118	0.0875012	0	1
LYa_b1_contig_13527 (1..1175) consensus	19.8118	0.087514	0	1
LYa_b1_contig_89379 (1..490) consensus	19.8107	0.00986548	0	1
LYa_b1_contig_63664 (84..1844) consensus	19.7909	0.000591573	0.0329381	1
LYa_b1_contig_35061 (1..414) consensus	19.7766	0.00301009	0	1
LYa_b1_contig_166080 (670..870) consensus	19.7617	0.0794432	0	1
LYa_b1_contig_2481 (1367..1583) consensus	19.7617	0.0794408	0	1
LYa_b1_contig_11376 (691..909) consensus	19.7617	0.0794559	0	1
LYa_b1_contig_181177 (478..733) consensus	19.7617	0.079471	0	1
LYa_b1_contig_88173 (1..274) consensus	19.7617	0.0794861	0	1
LYa_b1_contig_454075 (73..371) consensus	19.7617	0.0795012	0	1
LYa_b1_contig_413004 (771..1108) consensus	19.7617	0.0795162	0	1
LYa_b1_contig_168717 (2..343) consensus	19.7617	0.0795313	0	1
LYa_b1_contig_214113 (1..451) consensus	19.7617	0.0795463	0	1
LYa_b1_contig_20468 (213..678) consensus	19.7617	0.0795613	0	1
LYa_b1_contig_14504 (1..553) consensus	19.7617	0.079572	0	1
LYa_b1_contig_25750 (687..4833) consensus	19.7617	0.0795827	0	1
LYa_b1_contig_169175 (1305..1505) consensus	19.7101	0.0759509	0	1
LYa_b1_contig_197997 (1..234) consensus	19.7101	0.0759864	0	1
LYa_b1_contig_32104 (295..573) consensus	19.7101	0.0760216	0	1
LYa_b1_contig_111129 (365..664) consensus	19.7101	0.0760451	0	1
LYa_b1_contig_35921 (111..425) consensus	19.7101	0.0760499	0	1
LYa_b1_contig_180951 (14..336) consensus	19.7101	0.0760547	0	1
LYa_b1_contig_148316 (1..331) consensus	19.7101	0.0760594	0	1
LYa_b1_contig_10371 (6..352) consensus	19.7101	0.0760642	0	1
LYa_b1_contig_413953 (180..579) consensus	19.7101	0.076069	0	1
LYa_b1_contig_209066 (918..1324) consensus	19.7101	0.0760737	0	1
LYa_b1_contig_330456 (93..591) consensus	19.7101	0.0760784	0	1
LYa_b1_contig_19392 (1..514) consensus	19.7101	0.0760762	0	1
LYa_b1_contig_105819 (1..740) consensus	19.7101	0.076074	0	1
LYa_b1_contig_311856 (103..861) consensus	19.7101	0.0760718	0	1
LYa_b1_contig_8585 (632..1617) consensus	19.6779	0.000403262	0.0257886	1
LYa_b1_contig_296567 (62..293) consensus	19.6572	0.0747927	0	1
LYa_b1_contig_102545 (421..667) consensus	19.6572	0.0747842	0	1
LYa_b1_contig_220111 (41..309) consensus	19.6572	0.0747757	0	1
LYa_b1_contig_41498 (6..327) consensus	19.6572	0.074775	0	1
LYa_b1_contig_260151 (20..346) consensus	19.6572	0.0747744	0	1
LYa_b1_contig_64217 (500..833) consensus	19.6572	0.0747738	0	1
LYa_b1_contig_107905 (13..372) consensus	19.6572	0.0747731	0	1
LYa_b1_contig_102879 (46..519) consensus	19.6572	0.0747725	0	1
LYa_b1_contig_180227 (1..499) consensus	19.6572	0.0747757	0	1
LYa_b1_contig_182984 (19..662) consensus	19.6572	0.0747789	0	1
LYa_b1_contig_261564 (637..1289) consensus	19.6572	0.0747821	0	1
LYa_b1_contig_172246 (1..693) consensus	19.6572	0.0747853	0	1
LYa_b1_contig_51521 (1..515) consensus	19.6292	0.000416463	0.026414	1
LYa_b1_contig_161755 (1..201) consensus	19.6028	0.0765514	0	1
LYa_b1_contig_84920 (1..214) consensus	19.6028	0.0765103	0	1
LYa_b1_contig_94234 (12..225) consensus	19.6028	0.0764687	0	1
LYa_b1_contig_117174 (60..283) consensus	19.6028	0.0764268	0	1
LYa_b1_contig_299925 (279..536) consensus	19.6028	0.0763845	0	1
LYa_b1_contig_82196 (183..493) consensus	19.6028	0.0763423	0	1
LYa_b1_contig_37911 (1..371) consensus	19.6028	0.0763002	0	1
LYa_b1_contig_104596 (343..729) consensus	19.6028	0.0762583	0	1
LYa_b1_contig_79135 (107..553) consensus	19.6028	0.0762167	0	1
LYa_b1_contig_135788 (63..593) consensus	19.6028	0.0761751	0	1
LYa_b1_contig_39954 (622..1821) consensus	19.6028	0.0761338	0	1
LYa_b1_contig_172167 (513..739) consensus	19.5471	0.0808809	0	1
LYa_b1_contig_210370 (18..266) consensus	19.5471	0.0808784	0	1
LYa_b1_contig_135207 (34..309) consensus	19.5471	0.0808759	0	1
LYa_b1_contig_79853 (734..1016) consensus	19.5471	0.0808633	0	1
LYa_b1_contig_165431 (35..323) consensus	19.5471	0.0808507	0	1
LYa_b1_contig_79362 (4..313) consensus	19.5471	0.080838	0	1
LYa_b1_contig_144846 (1..320) consensus	19.5471	0.0808254	0	1
LYa_b1_contig_297218 (19..387) consensus	19.5471	0.0808127	0	1
LYa_b1_contig_90427 (121..501) consensus	19.5471	0.0808	0	1
LYa_b1_contig_115508 (9..247) consensus	19.5092	0.000335571	0.0228161	1
LYa_b1_contig_159246 (1..213) consensus	19.5058	0.0805962	0	1
LYa_b1_contig_141370 (1..219) consensus	19.5058	0.0806261	0	1
LYa_b1_contig_103832 (70..308) consensus	19.5058	0.0806559	0	1
LYa_b1_contig_188118 (77..343) consensus	19.5058	0.0806856	0	1
LYa_b1_contig_74790 (386..701) consensus	19.5058	0.0807152	0	1
LYa_b1_contig_142709 (514..854) consensus	19.5058	0.0807447	0	1
LYa_b1_contig_221288 (38..399) consensus	19.5058	0.0807741	0	1
LYa_b1_contig_71439 (93..503) consensus	19.5058	0.0808144	0	1
LYa_b1_contig_100017 (33..491) consensus	19.5058	0.0808545	0	1
LYa_b1_contig_233993 (128..805) consensus	19.5058	0.0808945	0	1
LYa_b1_contig_52983 (246..787) consensus	19.5046	2.95467e-07	0.000119913	0
LYa_b1_contig_306069 (41..243) consensus	19.49	0.0891648	0	1
LYa_b1_contig_184666 (1461..1677) consensus	19.49	0.0891919	0	1
LYa_b1_contig_73690 (2..225) consensus	19.49	0.089219	0	1
LYa_b1_contig_351937 (131..360) consensus	19.49	0.0892461	0	1
LYa_b1_contig_80287 (106..346) consensus	19.49	0.0892344	0	1
LYa_b1_contig_18399 (689..930) consensus	19.49	0.0892227	0	1
LYa_b1_contig_129443 (20..275) consensus	19.49	0.0891891	0	1
[truncated: 187,744 more rows]
