# Supplementary material for: Adaptive Differences in Gene Expression in Farm-Impacted Seedbeds of the Native Blue Mussel Mytilus chilensis
Source: Front Genet. 2021 May 20;12:666539. doi: 10.3389/fgene.2021.666539 (PMC8174845; doi:10.3389/fgene.2021.666539)
Supplement: Supplementary Table 7 — Intra-location by tissue comparison. DETs annotations. [file Table_7.xlsx]

## Sheet: UR_LCo (Bonferroni & FC>|4|)
Name	Fold change	Bonferroni	Sequence	e value	Accession	Description
LYa_b1_contig_296064 (154..2479) consensus	6011.84	0	CCTGACTGATAGGTTGGTGATACACGTTTCGATCTTCTGAAAGATTCAAAATGAATCTACCTTTCTGTACATGCTTTATGAATATCCAAAACAACTCACCGGTAAATGTAATAGGCACAGGATCGAGAATAAAAGACACGGCAAAAACATGAAATAATGATAAAGTGTAAAGAATGGTACAACATAACTGTAGAAACAAAATGTTTGTATGTATAAGATAAAATAATACATTGTATAAGAAGGTATTTTGGAGGGCGGGAATATCCTTTACATATGCTATTTAATTTTATCTGTATATATTTCTTCAGTGACGTTGCACCAATCGTTATACTAATATGTGCACAAAAAAAAAAGTCAAAGTGATGCTTTCATAAAAATAAAATGAACTCCTAAGATATC…	0.0271713	Q9T0F4	RecName: Full=Immune-associated nucleotide-binding protein 13; Short=AtIAN13; AltName: Full=AIG1-like protein
LYa_b1_contig_349399 (65..552) consensus	4466.65	0	ACCTCGGTTTGCATTTGATAAACTGTATGTTAAACATTTTGTTCTTAAGAGTAATTATTAGTTAAAGTTTTTCAGTGAATAAGGATTTTTTAAACTGTCTGGAAAAACAAAAAGTATGTAAAACACAAATGTCTGTAAAAGCTCAAACATAAAAGAAGTTTAACAGCACGAATTTGTTTAAAACGTGTCTTCTGTTTTGTTATGGTCGGCAAATTTCAAATAGGCCATACATAATGAATACAATGCCAAACCCATGAGCGCTACTCTGCTTAACTGGTCCCTTACACAATCCTGTTTCACCTGCTTTCGAGGCTAAACCTTTAATGTTTGATGTTTGAGCTGTAGCTTTATTCAATAATCCTTGATTATTCATTCTTAACAACCTTAAACATAGCATCC…	7.40638	Q9SUB4	RecName: Full=Alpha carbonic anhydrase 6; Short=AtaCA6; Short=AtalphaCA6; AltName: Full=Alpha carbonate dehydratase 6; Flags: Precursor
LYa_b1_contig_13830 (1..202) consensus	4108.21	0	CATTAATCTGGTATGTTCAGTTACTGGGTTCCAAGCCATGTGTTGTATTGTTGCTGATCGGTTTCTATATGGTGAATCATTTGACAAACTCATTAATCTTGTATGTTCAGTTACTGGGTTCCAAGCCATGTGTTGTATTGTTGCTGGTACATCTTTATATGAGAAAACATCACAAATACTCATTGCAGTGGTCAAAAGAGTT	1.96775	B0SGD8	RecName: Full=Ribosomal protein S12 methylthiotransferase RimO; Short=S12 MTTase; Short=S12 methylthiotransferase; AltName: Full=Ribosomal protein S12 (aspartate-C(3))-methylthiotransferase; AltName: Full=Ribosome maturation factor RimO >gi|238066364|sp|B0SPT9.1|RIMO_LEPBP RecName: Full=Ribosomal protein S12 methylthiotransferase RimO; Short=S12 MTTase; Short=S12 methylthiotransferase; AltName: F…
LYa_b1_contig_22552 (18..828) consensus	3575.69	0	TTCGATATAGGACGCATTTATTGAGAAAATGAAAAGAGAAAAAAATAATTGATTAAGATTTTTTTGGATATCAGGATGAAATACATATACAAGGTATGTCAGGTTTCTGAAATGTTAGGTTTAATATCTAAAGTCAATGAAAAAAGTGACAGTGCCGATTACAATAAGTCTCAAAACGAATTTATAGATCATAATTTTAGCTATTTCTGCTACAGCCAGCAATTTTTATCTTATTCCAATATCGATTAGTGGCACTTTTATTACAGCCTCTTGGACCTCCATTGTGCATGCGTGCATAATCTTCACAAGTGGTTCCACATTTCCAGCCTCCATAACGATTCATGTAAGTCTGAACACATCCTTTGGCACAATCATAATCCTTTGTACACTCTTCATAAC…	4.78e-32	Q6L6Q6	RecName: Full=Lysozyme; AltName: Full=1,4-beta-N-acetylmuramidase; AltName: Full=Invertebrate-type lysozyme; Flags: Precursor
LYa_b1_contig_295993 (7..386) consensus	2641.9	0	TTTTTTTTTTAATACGTAAATTTTGTTTAATAAAATGTTAAGGACACAGTACAGTCAAAAGTAAAATTCTTATCATGGCATGGACATTCCTATTCTTAATCTTGCAAAATCTGTAAAACAGCATAGCCAATGAATAGGTAGGCAAAACCATTGGTGCTACTTTGCAAAACTGGTCTTTTAGTGGCACTGCTTTCACCAGCAATATAACCTGTTTTACCAGCCAAAGTGTTCATCTTTGATGCTTGACCAATAGCTTTGACTAATTTCCCCTGCAAATGCATACGTAATAGTCTTAAACCGATCATCTTCACCTAAACTTCGTTTATTCTTATAAATTCTGTTTGTCACTTCAGTGTAACAAATCGTATTTTGACTATCTT	4.57367	Q12200	RecName: Full=NPC intracellular cholesterol transporter 1-related protein 1; AltName: Full=Niemann-Pick type C-related protein 1; Flags: Precursor
LYa_b1_contig_295989 (36..452) consensus	2551.68	0	GTCCTTCTAAACTTAACACATAAAAGAAACGAAAAACCGATTAAGCCATATTTATAAAAAAAACTGTGGAATGTTTCTTACAATTGAATGTTCAAATAATAGGCTGCATGAAACTACCGTTTCTTCCGATTTTATTTTCGAAAAATCTCATATAAGCCACCTCCAACGAAAACATAGGACACATATTTAGTGCTACTTTCTAAAACTGGTCTTTTCTTGAAACATCCTTCACCTGTTTTTTCTTGAAAACCTTTCATCTTTGACACTTGGTTTTTACCTTTGACAAACAATTCATTCAAATTCATCCTCAACAGCCTTAAACTCAACATCCTTGCTCCTGACATCGTTTGACCGCTATTAATGTCCTTAAATACTGTGTTTTTTTTTACTTCAGTGTGA…	3.80981	Q8VYU6	RecName: Full=Golgin candidate 4; Short=AtGC4
LYa_b1_contig_370248 (94..585) consensus	2347.07	0	CAGTTTAATCTTGTTTTACGAAATACGAAGAACACTTAAGATTTATAATAATTCATATTATTCTCTCTGAATATTACAAGTAGTAGCCATATAATGAGTAGTCAAATTTTCCGGCAGGCGGGATCGAGAATGATCAAAAATGGAATGGTTTGGAGCATGTCGGAGAAAAAAGTGGTAACTCATATGATTCCAGGAGGCAGACAAAAATCAAGTCATGCCCCTAAGATTATGAAGGCTCTGAAGGATCCTTTTGTGTTGCTGGTTTTTCCATTTTCCTGGATGGGATTTCGCAGCCTTAAAAGAATTTTCATATGATGAACAAATAAGAACTTACTCATTTTTAAGATCACAGCTAAAACACAAATCAATTTTCTTCAAATGCAGATAAACGAATAGTTA…	1.62475	Q7MYW1	RecName: Full=Peptide methionine sulfoxide reductase MsrA; Short=Protein-methionine-S-oxide reductase; AltName: Full=Peptide-methionine (S)-S-oxide reductase; Short=Peptide Met(O) reductase
LYa_b1_contig_296160 (40..358) consensus	2184.95	0	GTGTTAAATGACCATCCTGTATTCCTTCAAATCATGCAAACAAAATAATATCCTTATCGCAGAAACCATTTTCCTATAGTGTCTCTGCATGTATATACCCAATACGAAGTTACAGCAACTAGACCTCCAGACGCACACGATTCAGCTTGTGGTATCTTCTTCGGTTCATTGCTCGAATATCTTACACAATTGAACAATAACCTTTGACCTTTTCTGACTATCTTCATCACTGTTCTTTTGTATGTTCTTTTTGGTTGTCAAGGTTGATTTAAGTTATAGGAACTATCTTAGTGCAGTGTTAATACTCCGTCAATATTGA	4.76769	Q6D7E3	RecName: Full=2,3-bisphosphoglycerate-dependent phosphoglycerate mutase; Short=BPG-dependent PGAM; Short=PGAM; Short=Phosphoglyceromutase; Short=dPGM
LYa_b1_contig_269883 (20..316) consensus	1745.19	0	ACATAATTAAACGTATTATTTATGAAACGTGTAGGTCACGTTTAATAAACATGTCATATCATCAGTTAATGCTTTTTGTGTCTACGGTGTTTGTCATCTTCTTTATCTTTTTTATGCCTGCTCCCTTCGATTGCCTTTGGTTGTTGGCCACTGTGACCACCCATTAGTTTCATATCTTTCACAAACTTTGCCACCTCTTTACGGTTTTCACCTTTCACGTTATAACGCACTTCGTGGACATTAAACTCCATAATAACCGTAATCGCTATTCGTAGTTTCTTGTAAATTGGATGACCC	2.11086	Q5ZXH9	RecName: Full=N,N'-diacetyllegionaminic acid synthase
LYa_b1_contig_9068 (37..637) consensus	1582.39	0	TCCCGTTGATAAACAAAAAAGATAGTTGAGTACAAATAAACATGTACAGTCGAAGTAAAATTTTAACACAATGTCATGCATTCACAGGATGCGTTTAGAATGTAAGAACAAAGAAGGAATATCAAAAGCGAATACAAAAATGCGTAATAAAAGTAATTAACACAATAACGAACAAATGTCAAAAATCTACTTTTTTATGACAGGATTTCCGGTTCATTGGCGATGCTTACATCTCATGTATCCAATAAAACAATAACAAACAGACACCTCCAATACCGCTTCCAACTTCCCCAATAAATCCATTAGAGAAAGATCGTCTAGCTGGATTCCCAGTCATGCATTTAATTCTTCTACCCGCGGTTAACAGTCCATGCCTGTTCTTTCTTAGTAACCTTGCAA…	0	not available	not available
LYa_b1_contig_4187 (5..299) consensus	1414.25	0	TTTTTTTTTTCATATTACAATAACTTCTTTTATTTTAAATTATATAACAGCGCTGTGTTGGTATCAAGGTTAAGTGCAGTTTATACAGATTTTAGATCATCCTCCTTAATCAAGGTTAAGTACAGTTTATACAGATTTAGATTATGCTAAATTCACAGCGGCAATGTTCCAAGGGATGTTATTTTCCACATCTCTAAAAATAACCAGGTTGTCTTCGGTGGACAAAAATTGTCCATTACAGGTTATTTGTGTTTGGTTTGCAATCCCATTGGTTAAGCGCATATCTGTGTTTGGT	0	not available	not available
LYa_b1_contig_62658 (3620..6357) consensus	1374.08	0	TATATCCTTATCTTCTTAAATCAAAGTAACGCGTTTAAAGAGGGAAAACACCCATGTAAAAGGGATGCAAATTCGTCAATAAATGACGAAGATTTTTTGTAACTGTATGGCAGTTTCTTCAATTTTGATCCTTTTAAAAAGATAGATGAAGTATTTAAAGTTGAAACTAAATAAATTTAACGCAATCGCAACCTATAAAACCACAGTACTGTTTCATTGCCGGGAACTGAATTCTAATCGCATTGATAACTTGATCTTTCGATACTTGTTTCTTTTCTGGGAGCTTCAATTCTTTCGATATAAGTGAGGCTATTTGTTGTGGACATGGACACATATTTAGAAAGCTACACCATTCTACAATGGATTTGACTTTTGAAGATAAATATCTTACAACTTTTG…	0.961687	Q16832	RecName: Full=Discoidin domain-containing receptor 2; Short=Discoidin domain receptor 2; AltName: Full=CD167 antigen-like family member B; AltName: Full=Discoidin domain-containing receptor tyrosine kinase 2; AltName: Full=Neurotrophic tyrosine kinase, receptor-related 3; AltName: Full=Receptor protein-tyrosine kinase TKT; AltName: Full=Tyrosine-protein kinase TYRO10; AltName: CD_antigen=CD167b; …
LYa_b1_contig_217595 (228..2545) consensus	1357.23	0	TGATCAATTAACTCGATTCATGTGCTCACACTTAATTAAATCCTGTTTGACAATAACATCTTGATGGGTTAATTGGATCTTTATAAGAGCAGTCCAAATCGTAAATAATTCATTGGCAAACAAACCTCCTTATCTTACTTTTACTTCTAAGCAAAGGTTTTCATTCAATTAAATGTATAACCATGTCAAACGTGCGGGATTATAAGGAAATTGGACTTATGTCTGCTGGTCTGTTCGGCTTGTTTTTTTAATACAGTGTTCAATAAATCGCTTTGTTGTCAACCACGACCATCCATTTGTTTTCGCTGCTAAGGCTCTTTTTACGTGTTCTTCTTTATTCTGACACAGCATATGTACTTTTACGTACAGTGTGTCGTTATTTAAATCAACGGTATACTT…	0.25618	Q9HDD0	RecName: Full=Phospholipid-metabolizing enzyme A-C1; AltName: Full=HRAS-like suppressor 1; Short=HRSL1
LYa_b1_contig_296458 (1..863) consensus	1337.25	0	AATGCATTTACATGTCTGCACCAGGCCCACATGCCATTCTTCTCGTTGTACCTTTTGGAAAATTAGATGAACAGTATGTTGAGAATATGGAAAACTGCATTGCAATAATCGGAGACAAAGTTTATGACTTCTTAATTATCGTTTTTACTCGTTCAGATGATGATTTAAGACAAGTGCACACACGTATTACCAAGAAAGAAATTGATGATCATGTCGAGTCACTGGCTGAAAAAGTGAAAATATTTGTAAAAAAATGCCATGGAGTAGTTGAATTTGATAATTCATTGAATTCAGAAAATTTGGAGAAGATGGTTAAAGAGCTTATTTCTCTTGTTCCTGAGATCGATTCTGATAACCCACAGTTTTACACCAATAAAGCTTATAAAATAGCAGAAACCG…	8.185e-13	Q9NUV9	RecName: Full=GTPase IMAP family member 4; AltName: Full=Immunity-associated nucleotide 1 protein; Short=IAN-1; Short=hIAN1; AltName: Full=Immunity-associated protein 4
LYa_b1_contig_349490 (128..825) consensus	1303.41	0	GTGTGTATTAAATATAAAAAACGTACAGTTATTCAATGAAAAAGTCTGTGTAATATTTTGTCTTGAAGAATATAGTTTCTCTTTAGATACCTTTGCTGTATTTAAATTAAAAAAAAAAGCCTTTAGTCAAAATCTCCCCATATCCATCCTTTGCCAATAAGAGACGCTGTTTCAAACGAAAATTCGTTATCGAATACGGCAACTCCTACTCGTTTGCCAACTTTCAGACCACATCCAGCAAGCTTTGCGTCTAATGTTCCATCTTCCAATTTAGCCCCAGATGAAACGCCTGCCCCAAGATGAAGTCCAAATGGTCCACCTTTAGCTTCGACCAATGTCCCACGAGCTTTTACTTCGGCTCCAATCCTACTTCTTTTTTTGACAAAAGCCTCAGCATCA…	1.25019	P0AGL8	RecName: Full=Ribosomal RNA small subunit methyltransferase E; AltName: Full=16S rRNA m3U1498 methyltransferase >gi|84027953|sp|P0AGL7.1|RSME_ECOLI RecName: Full=Ribosomal RNA small subunit methyltransferase E; AltName: Full=16S rRNA m3U1498 methyltransferase >gi|84027954|sp|P0AGL9.1|RSME_SHIFL RecName: Full=Ribosomal RNA small subunit methyltransferase E; AltName: Full=16S rRNA m3U1498 methyltra…
LYa_b1_contig_451549 (72..688) consensus	1109.91	0	GTGCAGGACTTTAGCCTTGGAGGATTATTTTATTATTACATGGCATGGTTACAAACTAAATTTGCATTTGAAATTACATGTATCATGTTCATTATAAAACCGCGTTATTTTGAGTTATTTTTATAAAAATGTATTCCACAGGTGAGTCAATAGTTCTAAAACTGGCTATTTAACTGGTGAAAAGTTCCATTGTGCCCCACCTTGATCTACATATGTCACCTCATTGCCAACGACATTCAGAATGCGGTCGTTGCAACATTTACATGTTTGCTCTTTTATCTTGGTATTATTTCCGAGCCCAGCGGTTAATTCAACGTTAGTGTGTTTTGACGTCGGGTCATCTGTCATCCCAACTGTACCCTGTTGTGAGAACTTCATGTATCTGTTAGATGCAATATG…	0.387106	Q5HCN2	RecName: Full=Biofilm operon icaADBC HTH-type negative transcriptional regulator IcaR; AltName: Full=Intercellular adhesion protein R >gi|61213433|sp|Q6G609.1|ICAR_STAAS RecName: Full=Biofilm operon icaADBC HTH-type negative transcriptional regulator IcaR; AltName: Full=Intercellular adhesion protein R >gi|61213439|sp|Q6GDD9.1|ICAR_STAAR RecName: Full=Biofilm operon icaADBC HTH-type negative tran…
LYa_b1_contig_123224 (27..1977) consensus	1034.64	0	TATGTCCGTATGCAGCTGCAATCGTAGAATACAGACTTTTACCATCTTTCACCTTTGAGAAACGAGAAATAACTTACCACCGTTACACATGGAATATTTAGAACAATTGAGAAATGTTGGGAATGGGTTAGCAGAACAAATTGCAGCATTACTCAGGGATAATAGGGAATTGGCCAACCTGTTAGCTGAAAATGCCTTTGATGCTGTACTTGACTGGATATGCACGTATTTGAATATTCAAAGGGATGACGTCATTCCGACTTCTCTTAAAGTCCTGTTCATGTCGATAGAAGACACAGAGAACCACGACATGCAATATGTGTCAGATCTGTTCTACAAATCATTGTTTCATTACGATGATTGGGAGAGAGTTTTAATAGCCGTTGCAGTCATGCTTGG…	1.944e-12	P9WIT3	RecName: Full=L-gulono-1,4-lactone dehydrogenase >gi|614087186|sp|P9WIT2.1|GULDH_MYCTO RecName: Full=L-gulono-1,4-lactone dehydrogenase
LYa_b1_contig_296135 (1067..1460) consensus	1010.59	0	GTTTTTTGTTTTTTTGAAGATTATATGTTTGACGTCGAAACTTATGTTTGATATTGAGATGATTATTAGAAACAAAAGGTCTAAAAACTGTTAATAATTTTTTTCATTCCTTCAGATTTCCTAATTTCAATTATTCCTTATTAGTTCTTTTTTCTGCTTTAACGCTTTCAACACCAAACTTGATGTACCACACAGCCCAATTATGGACAGTACAAGAGGATTCAGTAGAAACAAATCGGGTCCAACTGCACTAGAACTATTTCTGGTACCTGATAACTGATCTTTTTTCATGTTAGCTTGTGTCGTCTTCAAAAACTTTCCATATCGCATCAATCTCGCTCCTATTAATCGGACAAATTGAGAACTCATTACTGCTCTTTTAAATGTTTTGTTT	6.6767	Q19970	RecName: Full=C-type lectin domain-containing protein 180; Flags: Precursor
LYa_b1_contig_296135 (200..719) consensus	984.77	0	AGCCACTTGTGAGAGTCTGATTCAAATGAAAAATAGTGCATACTTAAATACATGCTTTGCATATTTAATGTAATTTTGGTCTCTAGTGCTAATGTGTAAATCACCTGACATCTGCCTTATAAACAACATTGAGTAGTTAGTGACAATTGTAGGCGAATTGCTGTTGATTACGATACTTGTTGACAAGGTGGACATCGTTAGTTTCTGAAAAACTGACGCTATTATGTAATGGCCGCAATGTGATTCAAACGGTACAACTTATAGTCGCAGATTATTTTTCAGCACATTAATTGCAATTGTGTTATTGTTCTTACTGGGATTTGTTCATTGAAATTTAAGCTAATAACGTGGACATGTGTATCTTAAACATTCGTGTACTGTGTTTGAGTTTTCGATTTT…	6.71812	P62575	RecName: Full=Sialidase A; AltName: Full=Neuraminidase A; Flags: Precursor >gi|50402231|sp|P62576.1|NANA_STRR6 RecName: Full=Sialidase A; AltName: Full=Neuraminidase A; Flags: Precursor
LYa_b1_contig_349610 (55..710) consensus	969.25	0	AACACAGATGTTAACGTCATATAAAGACGGAAACTACCTGTTTAAAATATTCCAGTTATGTATTTATATAGCAAACGTAGAACTAGATCAGTGATGGTTTATGATCAACATAACATGTAATATGTGTGACAAGGAAAACTTGTTCCAACGTAACTGTTTTGAGACTCATTATTTATATTAGGAGATTTTTTCAGATTAATAATACATCGATTTAATTTGACAAAAAGTACAGTGTACACGTCAAAACAAATGTTTACATCGAAATGAGTTGCAGATAAAAATGAAGGTCATCAAGCTCCTACTACTACCCGGCTATCCTTGAAAAATGGATTATTTTCTTCATTTTTAACATTTTTTGGCTCATGTGTATCTTCTTTCTCAACGCTTTGAAGGCACTCC…	1.98584	Q7MGL4	RecName: Full=Oxygen-dependent coproporphyrinogen-III oxidase; Short=CPO; Short=Coprogen oxidase; Short=Coproporphyrinogenase
LYa_b1_contig_67244 (25..953) consensus	952.335	0	GTTAACTTCATATAATAAATCGTTTTCTGTCTCATCTCGATGACACAAGACGCAGAACTTACGGATTTTGACTGGATGGGTAGTTTGGACTCTGAATTATCATGTAGAAATATTATTGATAGTAACAACCAAGAAGATACATTCAACATATTTGCAAGGCATTCAAGAATAATGGAAAAATTAAATGACAATAGAGTTATTGATTCTTTTTTTGGAGCTTTTATTGATTGTCTTATTAACCCAAAACGGCAATCAAATAGAAAGCACAAGAATACAGATATTCGACCCTGCGAGATGTGGGAGCGTTTTGCTGAGTATTATCTCAGTTTCGTTGATATACAGTTGGTTCCAAATTTTAATGAATTAAACGTAAGGCATGCAGGAAAAGCAGACGATAAA…	1.84112	B1IL57	RecName: Full=Bifunctional purine biosynthesis protein PurH; Includes: RecName: Full=Phosphoribosylaminoimidazolecarboxamide formyltransferase; AltName: Full=AICAR transformylase; Includes: RecName: Full=IMP cyclohydrolase; AltName: Full=ATIC; AltName: Full=IMP synthase; AltName: Full=Inosinicase
LYa_b1_contig_627 (841..1436) consensus	908.168	0	GAAAAAAAAATCAAAGAATATATCTTAGAGATATCAAACAGAGAAACAATTCCCATTGCAGTAGAACAGTGTATTATTTATTCTGTTCTCCGAAATTACAGTACGACCAATACTTTGAATAAAAAGGTAACAATTGTATTGCCATGGTAATCTTTTTATTTTTTAGACTATTTTTTTTACGTTGTGTCTTCTGAATATGTAATAATCATTTATAGGAATACCATTCTTTGTAAAGCAAAAGTGTATAACAACACAGAAGGAAAAAAAAACATTGCACAGTCATTTCTCTTTTTTTGTATGGTTAGTTCATCTCATACAACCAATAGCACAAAAATAAGATGACTCCTCCAGCTGTGCCAGTAGAATCAATAGATCCACCACTTAAAGATCGTACATCTG…	1.57635	O69280	RecName: Full=Transcriptional regulatory protein EntR; AltName: Full=Entericidin R
LYa_b1_contig_122699 (18..1609) consensus	892.515	0	CTACAACACAAACGTGAGGGACACAATGAAGTTCAAATTTACGGAACAAGTCGTCAGGATTACTCTAATAACGGCATTGTTAGTAAACCTATTGCGTTCTCATACGGAACCAAAGAGAACCCCATTGAAAATCATAGAACAGCATAAGATGGAAATGAATAACAATAATGACATTGAAGAAAATTTAAGGGCAAATATTTGCTACTGCATTGGAAATGTTTGTTATTATTGTCCAGCCAATTTATATTGCAACAACGACCATTCAGGATGCTGTCCCACGCCTAACTCTGCCAACCAGTGTGGAAGATTCTGTGTCCCTCCAGGGCATACATGTTGCAATAACAAAGGTGCATGTCAAAATAATTATCCGACTTGTTGTGATGAATACTGCTGTAAGCA…	0	not available	not available
LYa_b1_contig_296211 (8..591) consensus	824.514	0	GTACAATTGGATTGTTATACTAGTGTGCATTATCTTCACCCAATATTCTTTTCCGGTTCATAGTTGTTATTCATAGAAGTCCCATAACGGGTTTATCTTCTCTCTTGTTTTTCCTTCTGTTCATACGTATCCTTTCCTATCTTTATGACCTTATTTGTAGTATTTAATGTTTCTATTGTAGAGTCGACGTCCAATTCGTTCAGTTTATGTTGGCTCTGTTGTTTCGGCCGTTTCTGTTTTGCCTTTGACTTTCCTTTATATGAAACTGGTGGTATAGTTGGTTTCATAAATTTTACTTTTGGTACCTGCATTGGAACGATCTCTCGTTGTCTGACAACCTTAAATGTGTTTTGACGTTTTGCAAATTGTGATACCGACTTTTGCATCATAGGCTTTGCG…	0.696052	O75626	RecName: Full=PR domain zinc finger protein 1; AltName: Full=BLIMP-1; AltName: Full=Beta-interferon gene positive regulatory domain I-binding factor; AltName: Full=PR domain-containing protein 1; AltName: Full=Positive regulatory domain I-binding factor 1; Short=PRDI-BF1; Short=PRDI-binding factor 1
LYa_b1_contig_349381 (94..495) consensus	791.133	0	GTTTAAATTTATTGATGCAGACATCGAATACACTGACATATATATTTATATAAACCAAAGTTTTCAGCAAAAAGAAAAATGTTATGTCATGATTATCATGACACCACTGCTTTCAAACATACTTCTATTAACTTCCATTGATTTGAGATACATTTTTGTCGTGAAGTAGAAGCCTCCAACGGAAGACACAAAAGCTGCCCATAAATGTGGATCTGACATATAGGTTACGCATCCAACTTCGGTTGAAAGTAGTTTGGCACCTGATATTTTAATAGTTATCCCTGTCTTTCTTGTTCCCAATGTCAGTTCATTCCATATCAGTCTCGATCCGGATAAACATACTCTTCGCAATCCCATAATGACTCTTAAAGATATTAATGTGTTATCAACTCTTCATGT…	0.903956	Q66JK1	RecName: Full=Nuclear receptor subfamily 6 group A member 1; AltName: Full=Germ cell nuclear factor; Short=GCNF
LYa_b1_contig_349436 (1..574) consensus	779.16	0	AATCAGAAGAGCGTCTGTATTCTCCATCAATGATATCATAGTTCTGGCAAGGGTCAAATTCACATCCAGGAGAAAAACCATTTTTAGATGTTTGACCTTTAGGACAAGGCAGTTCCTTCCCAAAGCAATATGCTGTATCACATCCACTAGTAGACATTAAATCGTAGACATAAAACTCTCCGCAATTTTTCACTTGGATATCGTAGCTTTCCAAACAACATCCGTTTTCAGAATCTGCCATGCAACCTGTTACATTTGCTGTAATGCCTTCCGCTGGATGCGTACCGTTCATCCATATCGGATAATAAGCTCCACAAGCAAGATTATTAACTGGACATTCTGTTGGCATCATGATCCCTGCCTTACTTACTGGCCTATACCATCCAGGCTTAAGAAAGG…	2.937e-17	P25291	RecName: Full=Pancreatic secretory granule membrane major glycoprotein GP2; AltName: Full=Pancreatic zymogen granule membrane protein GP-2; Flags: Precursor
LYa_b1_contig_41001 (204..757) consensus	734.3	0	AATTATATGTGTACCAGACACGGGTTAACTACCAATTATTATTTCTATATCACCAGGTTAATCAGGACATATTTCAGACTTATTTCAAATGTCGCTGTAACGAATTGTATTTCCGTTCAAATTTATATGACTTTTGCCTGTCACGGGCCCTCATTTTCGACTCTTAGACTGCATTATATTCCACTTCTTCATCAGTAGTGAAATGCTTGGATTGGATAAGCGAATTGCATATAAATCTAATGAATATATAAATTTTTCTTTAAACTATACATATTATACCGTTGTTTTCCGTTTCATCAAATAGTAACATTGTCATGACGTATTCCAGCAGTATAGGTATAGATTCAGTAATTTATAGTTTTACATAATGCATGGACACCTGATGAAAATTATGTCACG…	0	not available	not available
LYa_b1_contig_43095 (1..318) consensus	703.475	0	GAGGGATCAAAATGCACTTGTACCGAAGTAATCTCTTGTATTGTTTCTGATTGAACTATATCGGATAACTCATTAGATATAGTCAGATTGTTTTTCTGTCGAGTTTCACGTCTGTGAGCTGTTCCATCTTTCGTTGATGATTGCCACCATCGTTTAACACCACGTTTGTGAGCTGTTCCATCTTTCAATGATGATTGCCACCATCGTGTAACACACGATTGCTTTTGAGAATTTCCATTTTTCCTAGATGCTCGCTTTCCTCTTGTTGCATTTGCACCTTTCTGCACAATTTCGGTGAAAAACTTTTTCACCTTCAAT	2.94924	Q9D945	RecName: Full=Protein LLP homolog; AltName: Full=Protein LAPS18-like
LYa_b1_contig_296510 (166..643) consensus	700.833	0	GTCGATTGTATTTGTCACTTATGTAAAAAAGAAGATGTAGTATAATTGCCAAGGATACAACTCTCCACAAAATGATAAAAAAAGACAAATGTAAAACATTGCAAACGGAAAAACTAACTGTCTAGTTGATGTACAAAAAAAAATGAAAAAACAAATATGTAACACAGCAACAAATACAATACAGGTTCCTGGCTTGGGACGAGTACATGCATACATAATGAAGCGAGCTAAAACATGTTATCGGGATCCTTTATCGATAACTGCACAATTTTTGTATTCATGGGCAAGAATATTGAAAACATCTGAGTTATTTGTCTTTAAGCATAATGAAATAAGTTAAATCCGAGTTAACAGCACGTTAGTTCTTTGATGTTGCTTGTGGTTTGTTAGAAAAGACAT…	6.21992	P47188	RecName: Full=Putative UPF0320 protein YJR162C
LYa_b1_contig_35698 (354..1239) consensus	671.651	0	GTTGAATCATAATACTTTCAATACTATTTTCAATAGAATTGCGAATAATCCTCAGCCTGGATTATTGACGTTTGACTCGTTTATACATGTATGTAATAACCATGACACTCAAAATGATACACACAATTACAACTATGGCCGCTATGTGAAATTTAGAATCCTCTATAGTTGTTTCTTTGCTATCTTCATGATCTTTTTGGCACATGGTTAGATTATGATAAAACACTGAATTATCAACAGTCTTAAATGTACATCTCAAATACAGATGTCCACCATTGTAACTGTGCATCATGTTCTGTAAACTATGTCGTATTCTTATCAACTTGTAAATCGTAGATCTATTTTCATTGAAGACGGAATATGTGTTTGGAACGATGGTAAAATCTACTTCCTTAACAT…	0	not available	not available
LYa_b1_contig_8386 (92..485) consensus	668.948	0	ACAAATCTAGAATGTTAAGGTTTTAAGAAGAAAAATATTTTATCACTGAACTCCACCATTCCTTGATTCTCTCTATTATGCCGGAAAATGCATTACTTTCCATTGGTTGACGAACTTCTATATACATTTCAGTCTCGGTGATATTGATTATAACTGTGAAATCTCCTCCCGGTGCCATTTCATAAGCATGTCGAAGTAGATACAACTGTATTGAAAGATGTCTACCTTCTTGTCTATATTCTTCCAGAATCTTGTAAATTGACGTTCTTAACTCTTGTAGTTTCGTATCTGCGAATTTACCAATTTCTTTTGGATCATGTTTGAGAAGAATTTTTTGAATCTCTACGTCTGGAATAGTTTGTTTAGGCATTTTCGAAGCAGAAGTAGATTTACT	0.253956	P62575	RecName: Full=Sialidase A; AltName: Full=Neuraminidase A; Flags: Precursor >gi|50402231|sp|P62576.1|NANA_STRR6 RecName: Full=Sialidase A; AltName: Full=Neuraminidase A; Flags: Precursor
LYa_b1_contig_6385 (1..330) consensus	660.002	0	AGATACTCCCCATTCAGATTTGAGTAAGTACAATTTTTGTACCACCAAGCTCCAAAAGTCTTTTTTGCGCAAGAAGCGTTGCTTCCTTGGTCTTTTGTACTGAATTGAGCCGAATTGCTGTAACTCATTGAATCTCCTGCATTGCCACTGTAACCTCCTATTGTTAGTTTATACCCTGAAGCTTCGGTTCCCAATTTGAAAGTATTATATGTAGCATATCTTTTGTTGCCATCCCAGTCCTGTAGTTCAACTCGTAGCTGATATCTTCCTTTCGAAGTGAGCTTGTAAAGATGTTCGTTACCAAGCCAGAATTCTCGCGTTGGGTCACCA	1.029e-29	P19477	RecName: Full=Fibrinogen-like protein A; Short=FREP-A; Flags: Precursor
LYa_b1_contig_21146 (1..849) consensus	596.257	0	TATATTTTGGTGCCAAAAGGGGTCTTACTGGACCTACTCCTTTGTTGTTTGAGCATCAGAATATGGGCTATTACACTATGATCACAAACGTAGGAATTACAGGCTCCTAACGTTAGTCTGACATTGGACATATGTTACAGGGTTAAACATTTACATGCAGGTTAAGCACTACACATACCTAGAGAATTCATTAAAATCATTATAGTTAGTATATGAGCAATCTTTAAAAATATCAGGCGACCAGTTTTGTCAACCAATTGGTCAGTTACCATCCTATAAGGAAGGATCCCACTTCCCGATCTTTTTTTTTCCCAATAATCGATACGATAGAGTGACTTGTTGAATTGATTGAATCGTTATTGTTGTGAAATAACAAGATTCATTGTAACGAACACGTGT…	1.39703	P94605	RecName: Full=DNA gyrase subunit A
LYa_b1_contig_349749 (1..1285) consensus	578.331	0	CCGGAAGGGAATGTAATCGTGTATGTAGAATCTGTTTTTTCGCTAACTATGAGATTTTGATCATCACATAGTCTGGCAGTAATATATCGGTTTATTTTTCTGCTAGATATACGTCCTGTTTCACAGAAATTAGCAATAAATATGCTATTTGCACTTCTGACAGCGACTGCACAGTTGCAGAGTCCGTTAGTACCTCTTACGCATGGAGTAAAGTAAACATTTACCTGCTGTGGTAGTCTCTCATGTTTATACAAAACATATTCGCCTTTGTCTGATCCGGAAAGAAAATCCCAAGTTTTTTGGTCAAATGTTCTCATGTAGGGATCGTTGTAAGAATAGCAAGCGCTACCCAAGAGTTGTATATCCTTGTCCACGATGTAAATTTTCAAATCCGGAAGT…	0.0005633	Q6DFV8	RecName: Full=von Willebrand factor D and EGF domain-containing protein; Flags: Precursor
LYa_b1_contig_457657 (39..783) consensus	569.622	0	CTTCGATTAGCATGTTAAAGACGAACAATATATTGGTGAGTTCTTTTTTTTTTTGTAAAATAGTGAAAAGGTAAATGATCACATTACTAACAACAAGAACATATGTCCTTTTTCAAGTTGAAGGTTTCATCTAAATCCCGTCTCCAATGAATCTACTGACGATCATAAGTTCATCCAGAAAACATTTCCCGCTCACTTGTAAAATACAGTGCGTATTTGCCGTTAAATTATTGTCAACAAATCTGCTAGAAATGATCTTGGAATCATTCTCACAAAAATCCACATTCAATCCTGTTAAACCAAATTTCACTGAACACTCCCTAAATTTCATAGGTCTGTTGTCATATCCTAAACGCAGTGTATACACTTCTCTATCTTGTCCATCATTCATCGCCATAA…	0.451058	Q49VK4	RecName: Full=Sensor histidine kinase GraS; AltName: Full=Glycopeptide resistance-associated protein S
LYa_b1_contig_297247 (171..697) consensus	556.781	0	TGCAATGATTTACATTGATTTCCCATTGAAAAAACCGATAACTTCAAATGTGTTTTATAAAATGAAACAACCGGTTGCACAAAGCCAACACATCCGGAATGTTTTCTTTAGCATATAACCTGTCTCACTGTATCTTACTCTAGTCATTGCTAAATGTCAAGTCGATAAGCATTTAACGTTTTTGGTATTTTTTTTAGTATAATAAAAATGTTTCTCCCACAATTTCTTTTTTTTAACTTTTCACATTGATATTTGTATCAATTACTTTAAAATTAAATACTGAAATATTATTATCGCAAAATCCTTGTGTAATCTCTAAAAGCATACCTACAGAATACAATAATATGTCGGATTAATTTCCTTAAAGTAGTTTCGGCATGCACTTCAACCTGGACTATT…	0	not available	not available
LYa_b1_contig_1408 (3..712) consensus	546.015	0	CTGATGAGCATCATTTTCTCAAAGTAATAAAGAATTGAAATGATATGTCTAGATTATGCTTAATCAATAGTCATGCTTGTGTCACTATCAGTGGATGTGTACTTTGAACATTTTTAATGCGTCTTGTATTTTGTAAGTGTCATATGTTGTACTATTTAAAAATCCAAAATGCTCTATCTATAATCTTCTTTAATTGCTTCACAGTTTTTTGTTGATGATGCATCTCAATTAATGTATCAGTACTTCTTCGAAGAACATGTAAAGTTTGTTCCGATGCTGATATACCTGTTTTACACTTAAAAGCATTTTGAGCTCCTGATTCATTAAAATCAAATAAATCTCCATTTCTAGCATAAGATATCGTTTTTGAAGGATCAATACACGTGTCCTTCTCGTATG…	0.491381	O83439	RecName: Full=V-type ATP synthase subunit E; AltName: Full=V-ATPase subunit E >gi|238689321|sp|B2S321.1|VATE_TREPS RecName: Full=V-type proton ATPase subunit E; AltName: Full=V-ATPase subunit E
LYa_b1_contig_3849 (120..2049) consensus	543.431	0	CAGGTTAAACAATATCTTTATACGCCAGACGCGCGCTACAATATAACAATGGCCGTTTTCTTGACTTGGTACAGCACTATAAATCTTACGGATTAGTGACGGAAGTTTGACGCTTAATTGGTCAATCGACTACGCTGACTGATCCCCAAATGAGTTATACATAAGGTTGAAAGTTCAAATATTAAGGGAAAAATATTATCTCTGTTAATTTACTTTTGATTCGGTTGTAAATTCCACTTTCGATTTTAGACTAGGACAATTTTGAAGAATATCTCCCAGTTCAAGGTCTGCGACATTTTCTATTTGAAGTATGTCGACACATAAATTGCAGTTAACTTGGATATCTAATTTTCCAGATGTAATGTTAAGCTCTTGATAGTCTTTCTTAATAATGTCTTC…	0.551721	P53415	RecName: Full=Chalcone synthase 2; AltName: Full=Naringenin-chalcone synthase 2
LYa_b1_contig_73703 (1..1163) consensus	537.473	0	ATTTGAAAGTTTACAAACGTAATGAGCCAGATTAAACTTAATTAATCATAGGATTGACTCCCTTATGTGTATAGTTCCAGGATGAAACGTTGCTTCGATCATATTTGCAATATCTTGATCAGTTGGGTTATTTTTGTTTAAATCAACGGCAAGATTTCGGATTCCATTTGAATTCCTGTGTGGATTTTCCTGATGCACATCTACGGCCGCTCTTATCAAAAAACCTATATCAAACGGTATCATACAAATCCCGACGATACTACCAATTACAGGGACGGCTCCAGCTATCGTTATCCCTCTCATAGTGAGCATAACAGTATCTTCGGCTACTGCTGCAACTCTAAATGATAACAGGATTGGATTTGCAATCGCATTCCATGAGATTTTAGAAGCAGTTGA…	0.0004095	Q9BWW9	RecName: Full=Apolipoprotein L5; AltName: Full=Apolipoprotein L-V; Short=ApoL-V
LYa_b1_contig_65119 (72..1298) consensus	535.305	0	GTCAGACGATTTTACCATGAGACATTAGAATGGACTTGACCATGATATTTCAAATTTTCTTAACTCTACATTTTGTTGGTTGTATCGTTATAGGAAATAAACAGCCGTCATGTCACCAAGGCGTGTGTCTGTCATGGTACCAGAGTAATAATAATCAGCAATTAATTTTGATCTGTAAGGTAACAAACATGCACCTAAATGTTGTTTTTAACAAAACATCGAATGATGAGTATGGGTACTGCGTTCTACCATTTCCTACATCGAAATGTTTTTCTAAGTACAATGATAGCTTTATACATCAGGATACTTCAAAAAATCAAACAATACTGACAGTAAATAGTTCCGAGAAAAAATTATTAAACGGGGTTTGGATTTGTTCTTATGGATCCGTCGTAGTGA…	5.11075	A7GWA5	RecName: Full=GTP 3',8-cyclase; AltName: Full=Molybdenum cofactor biosynthesis protein A
LYa_b1_contig_299009 (61..761) consensus	520.865	0	CTTTTTAAAGCGATTCGAATGGCAAATTGGGAAACCGCATATACTATAGAGTTTAGAGTGAAGTCTACGTTTGTGTATATTGGAGAAATTAATGGTGTTACAATAACTAGTTTTCCTCCGAAATGTTTCTTTATCGTTTCATTGCTTTGCATACCCTTTGTAGCTTTCATGAACGTTTCGTTATCAAAAGAACGTTCCATTATTGTGCTTGTAGTCTTTATGGTCGACGGTAAATCTGTTGGCAGGCAACTGCTTATCTGGTTTAGGTCGGAATCTGCTTTAACGCACAACAGTAACATAATGTCCCTATTCGTGTCTGTCTCTAAGGCTGTATATTGCAATTTGTTATTGAATATTTTAATATCTGTATCTATTCTTCCATGCCACCTATTCGTAAGT…	2.05458	Q82BS5	RecName: Full=Isoprenyl transferase 2
LYa_b1_contig_349637 (1..274) consensus	519.902	0	TTTCTCTTCTGCAAATCGTGAATCCACACAATCAGTTGTTGTCGACTTGTGCATGTCATTGGTATTCTCAAAACCAAAATATGACCACCAACTTTGTTTTTTGCTGTCCATGTCGAACGTTATAATAATAGTTGAACAGTTCGTCGAACTTGCTATTTATTTCGATCTGAAGTTGTATAAAACTGTGGTATTCAATTACTTAAATGTGTCGCACATCTAACAATTACGTCCTTTCAGTTCAAAAGATGTATTACAACAACACAGGTAATGTTCA	1.54315	E7FBF7	RecName: Full=F-BAR domain only protein 1
LYa_b1_contig_237123 (1..1254) consensus	517.244	0	TTGTCAAAATAAGCAAAGAAATATATAGCTGATTAATTATTGCAAGTGACTAACTCGACCTCATGAAATCTATATGTATGTGAACTTCAGTTTTATTCATTAGATATAGATTGGTTACTCATGCATAAGTCGTGTTAAGCCATTAAAAGGAAACCGACATATGTAAATCCGATTGCACGAGGTCGCAATCTTTTTATATTTACGTTTATGTTTCTATCGGGCTATATGATTATCGGCAGTATTCGGAGGTCATCTCGATAGGTAATGAGATGACGTCTAGACTAAAATACACACGCAATTATAATAAAAATATTATTGAGTACATGCTTCATTAACTCTTTATTTCAGACTTGAATTTTCACGTATTAGCTCATTTGAGGTGCAATTCACGAGAATGTT…	0	not available	not available
LYa_b1_contig_189549 (1..470) consensus	514.584	0	AGCACAATAAATCATCGAATTTTAACTTGGAGGCGTTATTGCAAGATTTAAATCCAAAATACAAATCTTTGCTACAAAACACATTCGAGAACAGATATTTTCCATTTGATAACACAGTCACTGGCAGTGAGCGTGTCGAACAGATTTCAATGCTGTTGCAAAAAATCACCGACACCGTGGAAGCAAATGGTAACCAATATTACACAAACTGTGAATTTCAGAGAGCAGCACGTATAAATCGAGAAATAGAAAGACAGAATGCAATTAGAATAGAAGATAGAGAAAGGAATGTTATGCCTTTATTAAGATTTGGTGGGGCGGTTTGGTATATATTCCATCAAATTTGTACTGCAGTTGCAAATATTCTTCCTAATCCACCAAATCAAAGAATTGAAATTA…	0.00416	Q8K3K9	RecName: Full=GTPase IMAP family member 4; AltName: Full=Immunity-associated nucleotide 1 protein; Short=IAN-1; AltName: Full=Immunity-associated protein 4
LYa_b1_contig_17721 (25..347) consensus	513.72	0	GCATTTTCTAAGTCAGTCATCTTCCTCAGGATCATTCACGTAACGCTCGTCGATATCATCCATTACGTCCTCATCATTCATATCGACATATCGTTTATCTAAATGCCCGTCTTGTAAGTCCTCATTCGCGATGTCTTTATTTTGAATATCGTCGTTCAATATCGCTCGTCTTTGATCTGTATTGATTGTTGCAGATCGTGGCCATTTTTGTCGTGGTGGCCGTGGTCGTGGTGGCCGCCATGGTATTCGAACCCGCCATCGTCGTCGCCATCCTTCACATCCATCCATCATACAAAGAGCAAAGAAAATAGTAAGTGACAGCA	0	not available	not available
LYa_b1_contig_4807 (67..1394) consensus	503.835	0	CACTGTCAGTGTTTAAATCAATATTCCATTGATATAGAAAATCATTGAAAAACACTCTGAACTTTGTTTGTTAGAATATATACAATGGAAACCAGATGAGGTCTGCGTCGTCATTTGAATCTGATGATAATATCACTAGATATCAATATTACTGCTTTTAAAAAAAATGAAGACTTTTTTCTAACGTGCTTTCGCAGATTGCTGTCTGTACTTTCAGGCGCTTGTGTACCTTCTCCATGATCCCAGACAAAGGACAGTTCGAAGCATATTCATTGAGACAGGTGGTCAGATGTTTGGTGTAGAAACCGCCATTTTTGCCTTGATATGCACTTGTACCGATAATTGTTGCATAACCGATTAACACGTGTCTGTAATGGTCCTTTATCGCCTCTTTATTGT…	8.528e-12	P97864	RecName: Full=Caspase-7; Short=CASP-7; AltName: Full=Apoptotic protease Mch-3; AltName: Full=Cysteine protease LICE2; Contains: RecName: Full=Caspase-7 subunit p20; Contains: RecName: Full=Caspase-7 subunit p11; Flags: Precursor
LYa_b1_contig_349718 (1..381) consensus	503.208	0	CGCTGTTTCTTGTGGCGGCTTTGCCTCCTCTTTATATATGCATATAAAAAAATTATAATAAATGCAATCACAATACTCAATCCCAACCATATGAAAGTCTCTTTTAAACTTTTTTCATTTTTGACGTCATTGCATGTGTTAGTGTTAATGTCCAATATACTATAGTATTTCGATGATTTAGCTTGGCACTTTACGTTGACAGATATGTTGTGGTAGTTAATAATTGGTCCAACATCTAATAAAGTTTTTAATGTAACAGTATACAGTTCAGGCCCATTCCCGTTCGATTTAACATCTTTTATTATCTTTACTAATAGGTTATATTCCTTGTCCTTGTAAAAGATGGAACATTTTGGTATAGGATAGACTTTCATCTCAACT	2.79064	Q758M7	RecName: Full=Protein transport protein SEC23
LYa_b1_contig_19267 (240..656) consensus	499.899	0	CTTTCAAATAAAAGTTACTTGTGATTACATTAATATTAACTAAAGTGATAACTGTTGATCAAACTACCATGATATTGTTGCGTTATGAATTATATAAAACAAGCAAAATCTTTTCCAACTAAAAATCTGTTATTTATTCACAGTTTTATTACCAGTTCTCATCTTAAAAGGAATCATTAATAAAGGTCATAACTCTCTGTTTATAGTTGACGTTTCCGTGTTCTTTGATTATCCCTTCAGCAGCTGCAGAGCGGGGTTGTGTGTAAGAAAAAAGAGCCACATAGTCCCATGGTATGTTTTTCAATATCTCGAATGTTTGATCAGCCTCATCCATATTATCAAACCTTCCTCCGTTGTTTATCTTATCAGTGCTACATGATACAACCATATACATTTGAG…	1.1978	P46250	RecName: Full=SEC14 cytosolic factor; AltName: Full=Phosphatidylinositol/phosphatidylcholine transfer protein; Short=PI/PC TP
LYa_b1_contig_295887 (85..414) consensus	496.007	0	CTAGAATAACATTAAGAAAAGAAACGAATTAACAATGTTTGGTTGACATTTAGTCACGGATGCTGGGATTTATACAACGAATATGAAAAAAACGAATTAGTATTTATATTATTGAAAATCACTGGTGAGGATAGTACTATTATATGTTAAGACTTTTATCATTGAAGCTCGAAATAAAATTATAAAGGTGATTTAGATGCATCCTAGATATGCTTAGACATTTCGAAAAAGTTGGAATTTGTGTTCATTATTTATTCATTCTATAGAGTTAACTTCCTTCGATGATTCACAGTATGAAATTATCGTCTTTCTCTGTACACTTAATGTACA	0	not available	not available
LYa_b1_contig_297269 (1..947) consensus	483.265	0	TTCCATAAATTAGTCATTTTCATTATTTTCGATGCCTGTGTAAAAATGGATCTTTGAGTGCGTCTTTGGATACAGAGAAGTAGCACCATAAGTAAAATCAAAAAACAACCACCTGCAATTGCACTTAAATCTCTTCTATTACTATCAGTTAACATATGGTTATCACCAGTCTCTTTGATTATGCTCAAATCTTGTTTTGCAATGGTCAACGTTCTACTATCATCTGGATTGAATTCCTCAACACTTGGATTTAATGTAGATGCCGTAAAATCTGTATCAACTTTATTGAATGTCTTGCCCTTTTCAATTGCGTCTTTCATTGTGTTTTGCTCTTTGTTTTCAGGAGTTCTTGGTCCACTCATTTTTGAATTGGATTCCTTTATACTAGGTTTCGATTCA…	4.37019	Q70EL4	RecName: Full=Ubiquitin carboxyl-terminal hydrolase 43; AltName: Full=Deubiquitinating enzyme 43; AltName: Full=Ubiquitin thioesterase 43; AltName: Full=Ubiquitin-specific-processing protease 43
LYa_b1_contig_31549 (1..252) consensus	461.103	0	ATGATCATAAGTAGCTGAACGAACTATCTTGATAGTGGGGTCAGCAGTTGGGACCCAATCTTTAGTTTCAAAACTTGGTACAATGCGGACTATAAAATGGATATACCAATCAGTGCCGTCCACGAGTGTTGCAGATTTGAATAATCTGTCCATAGGTGCCCATATTAAACTGAACCAGTCTAGAGAACACACCGGTCATGCTATAGTCTCACATATTGACACAATTGAAAGGAAACTCTCAATAATTAAATG	1.10933	A2RBC2	RecName: Full=Probable carboxypeptidase An18g06210; AltName: Full=Peptidase M20 domain-containing protein An18g06210; Flags: Precursor
LYa_b1_contig_296266 (94..1250) consensus	443.706	0	GTGGCTGTTCAGTGTTGTTTTTTTTCAGTATAAGTGTTTTCTCTAATCTTGCCTCCAGTTCTGCTACTTGTAATATATTTTGGCCTTCAAATAGAAGCGTATCCACATATGTTCTAACGGCAGCATTTACGCATGACAGCACAGACAGTAAGGAATTTTTGTTTGCAAATTGGCTCAGACAACATGTCAACTGTTGAGTGTAGATCCCTCCTTTCTCAGTATCCCAAGCACTAGCACCGGGAATAGTTCCATAGCCTATTACGAAATGACTATAATGACTGCTTATGGACTGTTCATTCTTGAATACTGCTATAGGGTTTTCATTTTTATTATTTTGATCTGTTCCCCGACAGCAGTCGATAAAGAATATCTTTGGTTTCCCAGTAAGACCATCAAGCG…	3.365e-16	O01382	RecName: Full=Caspase; AltName: Full=drICE; Contains: RecName: Full=Caspase subunit p21; Contains: RecName: Full=Caspase subunit p12; Flags: Precursor
LYa_b1_contig_3435 (188..1605) consensus	442.709	0	GGAGTAAAACAATCTGATAATATGATATCAACTACATGTACATACATTTAACAGGTAGGAACTCTAGAAAAAATTCCCAAATAAAAGCTCAACATAGCGTTGAAAAACTGCCTAATCGCTTCAATGAACTACAATGCATTGTGAGCAACTACGTGTTTACTACAACTTAAAAACACGTGAAACTAGTATAGTGTTTTGTACTTTCATAATGAACGTTTTAGTTCAGCGAATGTGTACCATGTAAGATCTGAATGCTCAGATTAAACAAATAGTGTGTACTTGCTTCACGATTCGTCTTTCTTTTTGCCTTATAAAAGAAGTTGAACAGGATGGGTACAAGTCTGGAAAAGTTGGATATTCCCTGTTTTCAGGGAACAACCTACTTTTCTGGTGTTCAAA…	3.19053	B3DXL1	RecName: Full=Shikimate kinase; Short=SK
LYa_b1_contig_23937 (1..1387) consensus	431.249	0	TCAAGATGGGTTTAATGACAGGACTTGGACGTTGCGTCGTTACATTACTGAATATATTTTTCTTGATCATTAGTTTGGTGTTGATAGCTCTAGGCGTAATTGCATTTTATGCTTCGGAAATCCCAGCTATAGGGACGATTGAAGGTCAAATTAAAGCGATTCTTGAATCTATGTCTTCAGCTGCTGGGAATACAAACACCGACAATATCGAAAATTTCTCCATTGCTGAATTATTAGATGGTATTGGTATGGGACTGATTATTGCAGGCTGCGTCCTTCTTATTCTGTCATTTTTTGGTTGTTGCGGTGCCTGCTGTAAATTTAAAACATTGATTTTTTGTTACGCCCTGATAATAACAATACTTTTGGTGGCAGAAATAATTGTCGTGATTTTGCTTT…	3.63e-07	Q9UKR8	RecName: Full=Tetraspanin-16; Short=Tspan-16; AltName: Full=Tetraspanin TM4-B; AltName: Full=Transmembrane 4 superfamily member 16
LYa_b1_contig_1175 (1656..1939) consensus	430.392	0	CTTTAGCTTCATATTTTGTTTGTTTTTAACATAAAATAAGACAATGTCAATCATACCCTGTTTTGAAATTATTCCATGTATACGTGTAGCTGCAAGTCTTCCTGGGTTCCATACCATTTGTTGTGTTTTTGCTGATTGGTTTCTATATGGTGAAGCATTAGATGAACCCATTACGATGATCTCCTCGGGTTTAAAGGAAACCTCTGTTTCTTGCGAGACAAAATATCCTATTTAGTTTCAATGTGTTTGAAGAGTCAAAATGTCACTCGCATAACCTTTTTCAA	6.57642	Q89FG4	RecName: Full=Coenzyme PQQ synthesis protein B; AltName: Full=Pyrroloquinoline quinone biosynthesis protein B
LYa_b1_contig_295994 (52..392) consensus	429.536	0	GCACAAAGCACAGTCAAAAGTAACATTTCATTATAGCATCGACATCTGTTATCTTATTCTCGTAAAATCTGGATTACTGCATATGCAATGAATAGGTAGGCAAAAACATTGGTGCTACTTTGCAAAACTGGTCTTTTGTTGAAACTGCTTTCACCTGTGTTTCTTGCCAAACCATTAATCTTTGGTGCTTGACCTTTACCAATAGCTTTGACTAAAAATCCCTGCAAATTCATTCGTAATAATCTTAAACAAATCATCTTTATCTAAACTTCTTCTATTTCTTTGAACTCTTTAGTGTGACAAATCGTATTTTGACAATGTCGTGTTGCACATTTGGTTGA	3.64613	Q00683	RecName: Full=Protein U94
LYa_b1_contig_13374 (1..1317) consensus	415.189	0	GTTTTAGAGGGATCAAAATGCACTTTTTTTCCAATATTTATGAAAATAAACAATGCAAAGTGTATTACATTTTTCACTTTTTCACTGTTTTTTTTAAATGTAATGACAAGGTTGTAGGTACATACACCTTTCCAAATCCTAAATTTTATATGTATGTTTCTTGTGTTATAGGAGGTATTCTTTTGTCTTATCTTTTGTCTTATCAATTTGATGTAAAAGTGTTTATTTTTATGTGTCCCCTGTTTATCTTTTAATTGAAACGTTACGTAAAAATAGAGTCAAAGTAAATTAAAGGCATTTGATGAGGATATGTTCACCTTTTACGGGTATTTTATAGATCATAAAACGGAGAATGGAAATGGAGAATATGTCAAATAGCCAACAATCTGACCAAAAAAA…	2.55874	Q5VVY1	RecName: Full=Alpha N-terminal protein methyltransferase 1B; AltName: Full=Methyltransferase-like protein 11B; AltName: Full=X-Pro-Lys N-terminal protein methyltransferase 1B; Short=NTM1B
LYa_b1_contig_32586 (149..674) consensus	397.695	0	ATTTGTTGTGCATTACTTGCTTCTGTGTAATGAATGGGTACCCTATATCCTATGTTTTTTCTATTAACAAATTCATAGAACGCTTTGAATTTGGACAAAATTTTGATGTGCGATTCCTTTATTCTTGTACTTCTAATAGACTTAAACAGTTGGCGATTTTTTAAAGTTCTTCGTTTAACCGTGTATTTTCTGCTGCTTTCAACTGATTTGCGTAGCTTTCAAGATCTTTTGGAAATGCGTTTTTGGGTATGTCGACTAATTTCGCGGCTCCTCCACTTTTTAAAGCATTATATACAGTATGAACGCAGTTCATTGTTGTTAAATTGTAGATTTTCCGTTTTTTGAAATCAGTCCACCATTCTTTAATTTTATTCTCATTCAAAATTCTAAGCTGAATTT…	1.55134	Q9KS12	RecName: Full=Multifunctional-autoprocessing repeats-in-toxin; Short=MARTX; Contains: RecName: Full=Actin cross-linking toxin F1; Contains: RecName: Full=Actin cross-linking toxin F4; Contains: RecName: Full=Rho inactivation domain-containing toxin F2; Contains: RecName: Full=ABH effector region toxin F5; Contains: RecName: Full=Cysteine protease domain-containing toxin F3; Flags: Precursor
LYa_b1_contig_37020 (8..1945) consensus	371.202	0	AGTCAAATTTGTGGTAGCAAAATCGGTTCCAGGAACTGCTACGTTTTCACATCTTTTAACATTGTTGTCGCAATTTTCCTCGAATGCTTTTTTCATTAAACGTGGTGGATCATTGTCAGCTTTGGAACAATCTTTACCATGATGTCCTTCCAAACATTCACAAATCCCTTTTTTGCAAGATCCCCTTTCTGAACAATTATTAGGGCAGGTTGATTCTGATATAACTTCAAAAATATTTTTGGAGTCTCCATTCGAACTAGTCGTATTTGTATCAGTGAGATTTTCCATTTTTACCGCAACAGACATGCACTGACTTTCAAAGTTTTGGATTGTTATGGTGAGAAAATCATCTGAGCCAATCAGCTTCATATCCTCAATGCATTCTTTTATAAAAGATTC…	8.356e-12	Q6DFV8	RecName: Full=von Willebrand factor D and EGF domain-containing protein; Flags: Precursor
LYa_b1_contig_38705 (48..1097) consensus	369.607	0	CACTTCTCCAAAATTATAAAATAGCTGAGAAAATCTCCCTCTCATTTCCTCTGATTTGAGAAAATCTTGAACAAAATATATTTCAACAAGAGGCTTGCCAATATCTACATTCTCTACAATATATGCAAATGACCAGCCAGTATTTCTATTTTCTTGTGAGGCAATAGACGTATCGCAACATGCAGCGGTCCAAAAATATTTAGGAATGTTTGAGTTACTGAGGAATTTCCTTTCTTTGTTTCTACTTGGTATTACACCAGTTATAAAGTGAAGACTAGATCGAGGTTTCCCACAATGATATTCCGAAGCTTCCTTAAGATGTTTTTCAAGCCTGTACCAAGTATTTTGGTTGAATGTCCCATACTGAAGAGCCATATTTGTAAGGAGATTAGTATATTT…	1.75e-09	O94919	RecName: Full=Endonuclease domain-containing 1 protein; Flags: Precursor
LYa_b1_contig_350410 (29..442) consensus	367.003	0	GTGATTTGATATTGCAATGAAAAATGAAGGTACTAAATAAAATTATTGCGCAAATAAAAATTAACATACAGTTCACGCAGGAAAAATAGTAACTATTTCGTTTTCTTTGTTTTGTCTATAGTTTAAGCACAAATTTTCTCATGCCGAACCATCCGGCACCAGACGATAAAATAGCACACCAAACATGACTATCAAAAAGTAGCGATTGAAACTTTGATACCCTGTCACGCATGCCAGATGAAAAATGTCTTCTACCTGGTAACTGATGTTTCTTTATACTCCTATCTGGTAAACGCCCTATCCTCACATTTTTAATGATTCTTAATCCGGATGACCGGATCATTAGAAGGCTCATTGCTTGTCTTGCAAGTTTTGTCTTCTGTTATAAGCTCAATATGA…	2.20712	P32570	RecName: Full=Mediator of RNA polymerase II transcription subunit 22; AltName: Full=Mediator complex subunit 22; AltName: Full=Suppressor of RNA polymerase B 6
LYa_b1_contig_238968 (453..1202) consensus	365.396	0	TAAACTCGTTTATCTCAATCGGTAAAAAAAATTAGGTTCATTGAGTTTAATAACAGCATCGACCACCTTCTGAAGTATTTTGATTTATTCTTATGTTTTCGCCGTCATCTGCAGGTGCAAATTGTAAATTTTTCCCTCTTATTTGTCTCGCCATGTCTGTGAGTAATCGTTCTATGTTCGCGCCATTTCTTGCACTTGCTTCCATGAAATTTTCTTGTAAATCTTGACCTTCTGCAATCTGCACTTCTCTGTCGTCATTCAAGTCAGATTTATTTCCCAGTAGAAATACAACTGTATTTTCATTTCCCTTGTTCCGAACCTCTAGTAACCATTGTGGTACATTTTCAAAAGATTTTCTATCTGTGACAGCGTACACTACAATAATGGCATGTGCTCCTC…	1.314e-58	Q01890	RecName: Full=Ras-like GTP-binding protein YPT1
LYa_b1_contig_297477 (166..1028) consensus	364.023	0	AAAAAACGTTCTCATGATATATGTAATCATATAATCAAGAAATTAAAAAGGTTTTTTGATTTTCGGTCGAGAGCCAGTCGCCTTCAGAAAACTCTGACAATTCAATACGCTGTAACATTCCGTATGTAAAATAACACGTTCCTGTATAATTTATCTTATATTTATCACCATCTTCGATTGCTTCTGGTATTTCTTCACAAATTATTGCTTGCGTATCTAAATTATACAATGCAAGCGTATTTCCTTTAATGTCAGAAAAGGTGGCCTCGACGGATCCTTCTACAGTCACCAACGTTTCAAACTTAAATCCATCTTCTTTTTGGTTTGCTAGTGTCACTACCTTTATCCCGGATTTGCTAGGAACTCTAATATGCTCCTCAGTAACCCTTGTAATGATTT…	0.0643404	Q52SK7	RecName: Full=Hydralysin
LYa_b1_contig_349632 (1..777) consensus	362.661	0	ACTTTAATACACTGGGAAAAATTCACGGATGAACTTAACCATTAGCCTTTTGCATTGTTTAGTGTCTTGGCTCGCATATCTCATTATTTCGTTTATATCTAGTATCTTTATCCTTAAATTGCGTTGCCCTGCTATTTGTACTATTTCCTTTGCGTCAGGTTTAACATCAGTTTCATAGGATTCATTTGTGAAAATTATACCAATCCCTGCATTAGAGATAATCATAGATCCAATTAGCTTTAGAATGATGTCAGTACCTTTACCTGTGCTGAAAAAAGATCCTCTCTTTACTTGAACTACTGCTTTGTTCCCAATCCATTCACAAAGAACGTCTACACCTCTGTCGTTTCTTTGGCCAGTATGTTTAACATTTTTTACAGCAGGAAGGCTATCTATGTT…	3.90805	O52337	RecName: Full=50S ribosomal protein L22
LYa_b1_contig_118754 (1..1561) consensus	334.996	0	AAGCTTGGAATGCTGGAGGAAGACAACTGCTATCTTTAAAGACACCGACATGCCTTCTCCTGGATGAGAACAAAGAACTTGTATCCTTTGGATATGAAGCAGAGAACGACTATGCAGAACTTGTTCTAGACGAGAAACACCACAATCACTATTACTTCACTAGATTTAAAATGCGACTTTACCAGGCCAAAGACTTGACTGAGGAAATGCAACTTGAAGATGTCACCGGTAAGAGTATACCTGCTATAGATGTGTTTGGAAAATCCATCAAAGCATTAAGGGACCACCTCCTTAATTTGCTGGAAACAGAAGGGACTGGTGTTAAACCTCATGAAATAAAATGGGTTCTGACAGTGCCTGCAATATGGCCAGATAATGCAAAACAATTTATGCGGAAAA…	3.292e-91	Q96MM6	RecName: Full=Heat shock 70 kDa protein 12B
LYa_b1_contig_16569 (85..609) consensus	333.429	0	GCCTCATATCATAATATTTAAAATGGCTTCTTTGGGGATGCAGTGCCTACTGCTAGAATAATGCTTTTCACGCATTGCCTGATCGCTTCTGCAGCTTGTGAGGATTTTGCTTCTCCTGTCGAACAAAAAGTAGCAAAATGTTCACAATTATTACTGAGTACATTATACTTGTTCCATTTCTCTGGATTAGCAACGAAATTTCTGGCATCTGTCATTACGATGTCTGGTTTACGTACTAGTTCCGGTGGATAGACTACTCTGTAAACAGTTCCAGTCATAAATTCTCCTAAATCTACTGTAGTTATTTTTGCACTCGATTTTGTTTGTCCACTAAAATCAGCAACTCCTTCTTCAAGCGATAAAAAAATTCCATGGTGGTAATATTCCCCTAAAGTACTA…	0.001257	Q9HDD0	RecName: Full=Phospholipid-metabolizing enzyme A-C1; AltName: Full=HRAS-like suppressor 1; Short=HRSL1
LYa_b1_contig_307721 (17..543) consensus	323.652	0	CACACACATTTATTAAGCAAATCATATATAGAAAAGAAAATACGTCAAATATATCTGTCGATTTACGGCAATTGTCTCTTAGTTTAAGATAGCGTTAACGACAACACCGGGCACAAAACAAAGATATCTAACTGCTGTTATATCAACACAACAGTGATATCCTGTTAGAAATTGATCATTCACATAAATGAGAATATAATTAATAGACTGCACTTTGATTCTCAACTGAAACGGAGATCTGAAGTATTCAGCTTCCACTCTTCTGTCATGAATAAGAAGTTCTTTTTTCCAGGATTTATTAACCCGTGTATTCAATCCAATTGTTGATGATGGACCTAGTGGGTTAAACTGCAGAGCAATATTTGAATAGTCTTCATGGAATGCTTGAAAATTTAAAGG…	0.072611	Q64521	RecName: Full=Glycerol-3-phosphate dehydrogenase, mitochondrial; Short=GPD-M; Short=GPDH-M; AltName: Full=Protein TISP38; Flags: Precursor
LYa_b1_contig_18744 (65..492) consensus	305.81	0	CAAACATGAGAACAGAATTAAATTAAAAAGCAAACTTTTTTGTCAAAAAAGATCATTGTTATAATCATTATTATACATCAACATAAAACAACAACAAAAAGAAAAAAAGGGCTATTGTTCAATACGAAACACTAACTATTGGAAATACCAATTATGAAGTAAAAGATTTCAACAGAGTTCCAATATCAATTTTCATCATAAAATTCGTCTATGTTTTTAACATATTCTCGCTGAAGACAGTCGTTCATATACTGTTTTGGTCTGTATACTTTTTGATTGCCTTTGTTTCCACCGTCCCCACCAGCTCCTCCAAACCATCCTCCTCCGCCCCCAGCTCCACCATCATTTCCCCCTTTTCCACCAGAATTTCCCATCTTATGGTATTTCGTATCTTGATAA…	0	not available	not available
LYa_b1_contig_8521 (489..1670) consensus	305.495	0	CCAAAACGAATTGAAAACAACTGTCATAAATTCTTATGTAGATCATGCTGGAAAAATCTGATCTTTTCTTGCTAAACTGATCACTTTTAAATCTCTCGTATTGTTGTAAATTAAGATTTCAATATGCCTGTTGTAGGTTTTTGCAACAACTGGTATAATTTTATTTTGATAGTTACAAATAAAAAAAAACAGGGTGTGTATGATTGCCAACGAGACAAAGCACATACCGCATGGTCAACTATAAAAGGTCCAGATATGACAATGTTAAACAATTATAAAGAGAAAACAAACGGCCCAATTTATGTATAAAAAATGAAAGAAAAACAAATATGTAACACATAAACAAACGACAACTACTGAATTACAGGCTCCTCACTTGGGACAGGCACATACATAGAG…	0	not available	not available
LYa_b1_contig_349501 (40..1709) consensus	250.244	0	ATCGTGTTTTGTCTACCTGTTTCTTACATGCTATTAAATAATACCGAGTCTTAAGTCAGATTATAGTTGAATATATAATTGTTTTTCTATGATAGTGAACTGATTGAGTCCACGGTTACAGGTTAATATTGTTAATATATATTGTCGTAATTCACATGTCAAGCAAAGATATATTTTGTTTCAAAAGTCCAACTATTTAGATGAATTATCATATTGTGGATGTTCCATCACTAGAGAAAACGGCTCACGCATTGAAATTTGCGAAGACGCCAAGACTTGTGAGTATTCACGGGAATTCGTTGAACTGATGTCCAACGATCTTTAATACTGTCCCTGTGGTTTTGATAAACTAGTTCTGGAATCGCCAACAGCAGACTTTCTGGACATTAATCTTTTCTT…	3.376e-06	Q8N2E2	RecName: Full=von Willebrand factor D and EGF domain-containing protein; Flags: Precursor
LYa_b1_contig_15691 (3..1216) consensus	240.575	0	AAATACGATATATACAAAGTATAATTAAGCAAACATAAAGTCATTGTTTTCCAATATATTTTTTGCCAAATATATTAGATCTATTTGATCTATTTGTTTTGTCTTATACTTTGTTCGAATAATTTCAAGACATTCTTGGTTGTATCTAGTAAATTGTCAATGTTCATGATTTTATACATTGAAGTTGCAGCATAGGCAACTAGGGTACAGTTCTTTTACTCTATTCTATTGATATATTTTTTTGTCTTAAATGTAAATTCCAGTTTCCTCAATAAAGGAGTTAATAGTATATCAAAAGACTTTTCAAGTTTTGAAGTTGGATAATTGCATTTATTGATATCATCAATATAAAAGTTTCAGTTTATTTTGCTTGTAAACACGATTTTCAGATTACTACAT…	0	not available	not available
LYa_b1_contig_5179 (1..215) consensus	238.454	0	AGTCGTGTCGATCTTACTGGAACACATTTTGCAAAAATAACCAACCCCCATCTTTGCGACAAAGGCATTACTACACTTTGTAACGGTGCAGTTTTTGTGTCCTGCTTCACACATCAATGCATCTTCATTACAAACTGGACATTTCTGTAGAGCATTGGTAGACATTTTTAGCGCTGGAACAAAATGAGAACATCTAGAAATCACATTGTTAAGAG	0.865695	B4M7P8	RecName: Full=Bifunctional lysine-specific demethylase and histidyl-hydroxylase NO66; AltName: Full=Histone lysine demethylase NO66
LYa_b1_contig_6721 (13..3328) consensus	237.078	0	TCAGTGATAATGAACGCCATACTAAACTCCAAATTGTACACAAGAAACTAAAATTAAAAATAATACAAGACTTACAAAGGCCAGAGGCTCCTGACTTGGGACAGGCGCAAAAATGCGGCGGGGCTAAACATGTTTATGAGATCTCAACCCTCCCCCTATACCTCTAGCATATATTAATCTGAAACACATTAATATCAAAACTTTGCTGCAAATTTTTGCCCAACAAATTATATGAAGCAGTTGCTAGCTGAGTTTTAGATTTAAAACCACGTGTACATATAAAACAATAACACACAGAACACTATTAAAAAAGTATGACAGTTAATTAGCTCTGGTGACCTTTTCAGAATAACTACCGGATCCTCTGCTGATTCTGTGGCTGGTTTTGAAGGCTCTCCT…	0.163827	Q01836	RecName: Full=Probable endopeptidase p60; AltName: Full=Invasion-associated protein p60; Flags: Precursor
LYa_b1_contig_147104 (272..1719) consensus	230.23	0	CTCAAACGGTCTTTTAGAGATCAAGATTTTTTTTTTACAAAAGACTGTCCATTGTTAGATTCCCGATAGTCCCACCTATTTTCAAATGATTTAGAATTTTCCTTTGTATCTGTGTCCTCATTTCATAACCCTGCAACTTTTCTTTCTCCTCTCTGTTAACAAGTTTTCCAATGTACTGTTCAACCGTTAACGCATCTTTTTGCAGAGCTTTAGTATTAATATCATCGATTAATTCCATAATGAGTTTAAGAGTTTGTTTTAGTACGCCAAAGGATTTGTCTCTTTCTTTTTGTCGATTAACTACTTGTTCACCTGAATACATTGTGTCCACGTAGTGCAGTTCGTATACATATTGGCTTACTTCATGATTATCTACATCACATCTTCCATCGCAAACTG…	0.0001178	Q9NUV9	RecName: Full=GTPase IMAP family member 4; AltName: Full=Immunity-associated nucleotide 1 protein; Short=IAN-1; Short=hIAN1; AltName: Full=Immunity-associated protein 4
LYa_b1_contig_315638 (1..1103) consensus	225.415	0	AAATATTTTGTAACCTCTTATTCGACTTCTTTATCATAATCGTAAGTTTGATACAGTTCAAGACCACATTCATTACATGGCGGTCCATTGTTTGGTCCACAGACTCCATCATGCTCCATATGTTCTCCATTTCTACAAAATGCCTTTCGGTTTGTAAACTGCTTGCCGCAGTAGAATAACCCACTCCATCCTTGCCATTTATTCTGACATTCTTTTGATCCTTTTAGTACTCTGCATGCCGGGCAGTTAGCCCAGTTATTTGGTCCACATCGCCCGTCAGTGTCCGTTGGACCAATTTGCTGATTACCTCTCATTACAGGCCGTTCACAATAAAACATACCTGTAATAGGTCCTAACTTTGGATTATAGCCATTTCCGCCGCATGGTCGGAACACCATA…	0.0001826	Q22396	RecName: Full=Zinc metalloproteinase nas-20; AltName: Full=Nematode astacin 20; Flags: Precursor
LYa_b1_contig_264216 (34..880) consensus	224.385	0	ATACATCAGGTCAAAACAAGTTCGAATAAAAAAAAATAGTATTTAAAATAAGCTTGAATTTTCAAAATGTTCTAGATTTTGACCATTATCAACGGCTGATTATAAGATAGAACAAAACGATCTTTTCTGCTCCGCTGCCACTTTTTCGATTTCTTTTCTCAGTAATTTAGTTTCCTTGTCTTGAATTTTCTTCTCTTGCATTAATTTGAAGTATGCATGTGAGTAGAAACCTCCCATTGTTACCACTTTATCTGCAATTTCCATTGCAAATCCTCTTTTTTCCTCTTCAGAAGCATGTTTATTTTCTACAGCAACATATCTTCCCCCACAAAGCTGTAATAATTCTTGTACTCCCTCAGCAGTATTTTCTTCCATATACGTCTGCATGGACACCTCAAT…	5.906e-38	Q9NUV9	RecName: Full=GTPase IMAP family member 4; AltName: Full=Immunity-associated nucleotide 1 protein; Short=IAN-1; Short=hIAN1; AltName: Full=Immunity-associated protein 4
LYa_b1_contig_69347 (3..682) consensus	213.747	0	AATGTCACCTGCTCAGTCATGTAAAAGAGTCCATTAACACCATTGTATAAGCAAGTCAAAATATTGAATTCTAACGTGAATTGTAAATAAATGAAATATCAACATTAGATTATGAAAAAAAAAATTTGTTTTCTTCCTTTAAAATTATAAATCTACCAGTCCTCTTCGCTTGTCGCTTCTCATTTCCTAGTTTTGAGCTTTGAAATAATTTCGAAGGTTGTAAACGGTTTTTTTACCTGTTACACAGTAAGTAGCAAAATGTTCGGAATTATTGTTCAGTACATGATACTTTCCCCATTCGTTCTTGTAACTGGCATATTCCAAAGCTGTTCTTGCTGTGTCGTCTCCAGATCTACGTGTTTTATAATTTACTCTAAACAAAGGTGATCGGCCGTCTAT…	6.9699	G5EFI8	RecName: Full=1-phosphatidylinositol 4,5-bisphosphate phosphodiesterase epsilon-1; AltName: Full=Phosphoinositide phospholipase C-epsilon plc-1; AltName: Full=Phosphoinositide-specific phospholipase PLC210; AltName: Full=Phospholipase C-epsilon plc-1; Short=PLC-epsilon plc-1
LYa_b1_contig_20331 (124..1011) consensus	206.404	0	TACACAACATGACTTTCCTGTAAAGTTTATAGTTTTAGTTGGACTGGATTTTCTACAACTTCTATTTCACCATTTACTACATTTATAATCTTTCGATTTTGTTTTTGTTCCCCTCGACCACATAAAATGGTAATCTCAGTACGACCTACATATACGGTAAGTTCACAATCCCCCCACGTTTCTTTTATTTTCTCAGAATTCATAATAGTGCCCAAATCGCCTTCATATCTTCTCGAAAAAAACAGACGTTTTTCTTTGCGAATTGCAACCATACTGTCCTTGCTGAGTGTTGGTAAATACTCGTGATACTTGGTCTCTGATTTATTGATCATAAACCAGCCATCCTTGGCATTTGCGGTTAGTACATTCTTAGTCATTTTGTTGTGGAATGCTAACTCT…	0.207085	O70513	RecName: Full=Galectin-3-binding protein; AltName: Full=Cyp-C-associated protein; Short=CyCAP; AltName: Full=Lectin galactoside-binding soluble 3-binding protein; AltName: Full=Mac-2-binding protein; Short=MAC2BP; Short=Mac-2 BP; AltName: Full=Protein 90K; Flags: Precursor
LYa_b1_contig_5870 (4..802) consensus	201.914	0	CAAGAATACACAGATTTATTCATAAAGTTATACCGTTGAAGATCACAAGGAGATTTTGAAAAATCAGAACTATGTATTTCAATATTGGTCAGTATTCCTTATGCGCCTCGAATTGGGGAACCCAAAAATTGTATGTTAACAAAAAATCTGTATGTAGTGATACTGAACATGTTTCTTTCTTTTAACAACTGACTGATCCTAATTATTTGTGTTTTTGTTTAAAGTAGAGGAACATAACCTCAATGTGTAAAAACTACTGTGGATTCAATATTATTCGTTATATAGCAATTTTCGTAGCTTTGGTGGGTACAGGTTAACCAAGACATTAAATGTTTAATGAATAACATTTTTGTTATAGACTTGTAGGCAGACTTTGTCAAAACCACGAAATTAAATATC…	0	not available	not available
LYa_b1_contig_7095 (1..1884) consensus	177.529	0	TGTTTGGAAAGAAATTACTTTACCAGACATCAGCTTGTATATAAAAGATGACAGTCTAAACAGATTTGGAAGTCCATGTGAATCACGTAATGACCCCCACATGATTATATTCGACCAAGAGGCATGGGAACTGCAAGGTAGAATTAACAAGGGTGAATATATGCTCTATAAGCATGCAACAAGTCCACAACAGGTTAACGCATACTACACTCCTTGCTACCCAACAAATAATGCTCTGTGTAATTGTGGAATTGCTATCAGGAGTGGTTCCAGTATATTCGTGGCTAACTTCTGTGAAACCGGAGCACAAAGTGACAGAAAGTATAACCGTTATGTCATTTCAAGGGAATGTGATGGCCAGCATATGCTAGTTGAAGAAATAGGAACTTCACACTATAA…	1.554e-11	Q8N2E2	RecName: Full=von Willebrand factor D and EGF domain-containing protein; Flags: Precursor
LYa_b1_contig_23979 (1..863) consensus	170.774	0	GACCATCATGTATTATTTGTGAAATTGATACGAAATATATATCAACAAGGTCTTGATATCTTCAGATGAATTTTCTAGTGAAAGAACAAGATGTTCTGTAAGATGACCCTGATGCATCAAGTTTCTGCTAAAATACTGATAACGGTTAGTAGAGGATGAAAGTTTTTAAAAAAAACCGATGTTTTATTCATTTGTACGTAAATCAACAATTGTCTTTCATTCTCAATAGTTTGTTAAGTCATGGTCAAGTTTTTGTATAACAATTTCATAAACATTTTGCATTGGTTTGAAGTTATAAAAAAATATAAAAAAGTACAATGACAAAAATACTGAATTCAATCGAAAAGTCCTACTCAAATGGCAAACTCAAACGACAAAACACATGAAACAAATGGACAA…	0	not available	not available
LYa_b1_contig_350135 (101..1448) consensus	139.632	0	GCAGTATATAAATTGTTAATTTAATAGGAACAAATACATTATTAAACCTAAACATTTGATTGGTCCAGGGGTATTTGTGATATTAGTGGTAAAGGTGTCCCATAAGTCTTTCTATCTAAAGGTGAACTGCCTATATATCCAGGATTCTCTACAGGTGGCAACCTATCATTTGGTAGCAATCTTTTTTGAGTTTCATCAAGGTTTTCAACTGTTGCAGGGGTTACATCCTCTCCAGCCTCAGCCTCACCGTTTTCCTTTTTCTTTTTCTTTTTCTTAAGCTTTTTCACAGTTTCGTTGACTTCATCTGTTTTTAAAACGGTGAGTTTGTACTGAAACTGCATATTGTTTGGTCCAATTGTTAATACATATAATCCTTCATCATTCTTCTCTGCCTTTTTG…	0.003034	Q5VST9	RecName: Full=Obscurin; AltName: Full=Obscurin-RhoGEF; AltName: Full=Obscurin-myosin light chain kinase; Short=Obscurin-MLCK
LYa_b1_contig_11532 (43..336) consensus	135.544	0	CTTGGTCAGGTGCCCCTACATCATATACGCCTATATCCATAACTGGTAGGGATTTTGTTCTCTTTGTATTAATCTCTAGAACTGTTCTTCCCCATTGACCATTCTTAACCTTGCAAGAATCTTCTGCCACCTTGTATCTGATGCTCCTCTTGCCATTGACAGACATTGTAGTATCATCAAATCCAGAAAGTTGGATAGATTTCTCACCACTTCCAATGGCAATAGAGTTTTTACATTCATATGTAATTTTCTGGTTAACCTTTTGATGGAGATACTGAAGGAATTTTATCTGTG	9.839e-21	P13941	RecName: Full=Collagen alpha-1(III) chain; Flags: Precursor
LYa_b1_contig_34228 (3..1076) consensus	127.031	0	CGTAGTTACTGAAAGCAATTATAAAGACATTAATAACCGATAAAATCATCAAGTGTCACAATCAAAATAATCAATCAGTACTCCAAATCCAACATCCAAAGGATTCAGGCCTGTCGATAACAATTTCATCGGTTTCGTATTTCAATTTACACTTCCCCGATATTTTAATATAGGTAAACTCCTTTTCCTCCTCAAACATTCTTTTTGGAAACTCTTCTCTAATAAGTGTTTTTATAGGTATTTCATATTCACCAACTATAAGTTCGCTTGGTTTGTTAAATGTCACCTTGACTGTTCCTTTGACACCAATACGTGTGTTAAATTTATATTCAATTTCTTTTTCCTTTAGTACCGTTGACACTTTAATTGTGGACCTACTTGGAATTTCGATAACATCTT…	0.36509	Q6FIK3	RecName: Full=Iron-sulfur clusters transporter ATM1, mitochondrial; Flags: Precursor
LYa_b1_contig_2545 (1..445) consensus	126.236	0	CATCCCGGATTTCATTTTTTCTCACCATAACAATAATAGTATGATCGAGAAACTTCTTGTCACCAAATAACGCATTGAGTTCAGTAATAACACGCTTTTCTTCTTCGGTTGCTCTGTTGGGCGAAAGCACAATTATAAACGCATGAGGCCCAGGCGATAAAAATCCAATACTTTTTGTAACTTCTAATCTTACATTTCGTTTCATAGTGTCTAATATTCCAGGTGTATCAACAACTCTTACTTTCTGTCCTGATAACAGTGTGCCTGTACCTTCTTGGCACTCAATTGTCACGGATTCGCCTGCTGGAAGTGACTTGAAACATCTGAACCCCACCAGCGTATTCCCAAGAGCACTTTTCCCACATCCTGTTTTTCCAATAAGTGCGACTCTTAATTCTT…	9.342e-24	Q8NHV1	RecName: Full=GTPase IMAP family member 7; AltName: Full=Immunity-associated nucleotide 7 protein; Short=IAN-7
LYa_b1_contig_296267 (1..1900) consensus	124.2	0	CATCTGAATGTAACCCACAGATAGGATTTAAAAAAAACCAGGCAAAGTTTGAAGATTCTGGAAGATATGAATGCACAGTTGACGAGAAAGTCATAAATGCTTTTGATGTCATTGTTTTTGACCATCAAATCATCCCTATTGGAGGAGAATTACAGCTTGAAGCAAATGGAGACCCCATTCGTGCAATATGGATCTTAAACGGAGATCATGTGGTACCTGAACATCCTTTTTTTCCCGGACTTCTTAAACATCGTGTGTCTTTTAAGGATTTAGGAATATACATATGCAAAGTGAATGGTATAGTGAAATGTGCATATGAAGTGATCGATTTTAAACATTTGGTGTTTAAGATTGGATCAAACATACGTCTTACGATTGATACAAGGATCTTTGGTTCAT…	1.347e-08	Q92851	RecName: Full=Caspase-10; Short=CASP-10; AltName: Full=Apoptotic protease Mch-4; AltName: Full=FAS-associated death domain protein interleukin-1B-converting enzyme 2; Short=FLICE2; AltName: Full=ICE-like apoptotic protease 4; Contains: RecName: Full=Caspase-10 subunit p23/17; Contains: RecName: Full=Caspase-10 subunit p12; Flags: Precursor
LYa_b1_contig_53067 (1..1787) consensus	123.046	0	AAATAAGTCAACATGACCGACATGGTCAGTTGACCCCTTTAGGAGTTATTGCCCTTTATAGTCAATTTTTAACCATTTTTCGTAAATCTTATTTATCTTTTACAAAAATCTTCTTCTCTGAAACTACTGGGCCAAATTAATCCAAACTTGGACACAATCATCATTGGGGTAGCTTGTTTTAAAAATGTGTGGCGTGACCCTGCCAACCAACCAAGATATCTGCCATGGCTAAAAATAGAACATAGGGGTAAAATGTAGATTTTGGCTTATAACTCTTAAACCAAAGCATTTAGAGCAAATCTGACATTGGGTAAAATAATCTATTAGGTTATCTATCTGCCCTCAAATTTTAAGACGAATCGGACAACCCGACTGTAATCAGCAATAATGTTCAGCAAA…	0	not available	not available
LYa_b1_contig_13136 (71..616) consensus	122.643	0	ATTTGATAAAGCCAAAACTTAATGACAGCATTAAAAACCGCCTCTAAACACTAGAACGTAATATCCATCCATCTTGAAAAAAACGTAATAACCTTTTCTATGACTCACACTGAACCAAAAAGGTGAGCTGCTCACAACACAGTTGTATTTCCCAACCATATATCTGTCTAATCTTTGCTTGATATGCATCGCCATTTCCCTAGGCCTGCGATAATATAGTAGTGCCTGTCTTGCATAAATGAACACAGTTCCTTTCACAGAGCTACTCATGTTCTGGCCAAAAATTTGGACAGAATTATATCTTTTTTGTTTATTCACCTTTGAAAGGACTTCTGGCGAATCACTCTCAACATAAATCTGTTTTAATCCATCTAAGGTTGTATTATCGGATTCTCTCTT…	0.334647	Q3SGF0	RecName: Full=Glycine--tRNA ligase beta subunit; AltName: Full=Glycyl-tRNA synthetase beta subunit; Short=GlyRS
LYa_b1_contig_11493 (145..1629) consensus	122.438	0	GTCGTTAGTAATGAGTTTCTTAATATAGGTCAGAAACAATTGATTCAGTATTTTTATCGACCACCAAGATCTCCTTCTTCCATTTTATACTCCTCCCAAGTAGTTTTCAATTCGGAACGAACCGAATTGATGTCTTTGAAATGATCTTTAAGATCCTCCGTCATCAAATCCCAGACACCTCTCCATTTCGATCTGAAGTTATCTTTATCAATCACTGCCCATGTTCTATTTGATTCAACCAATCCAAATTTCCAAAGGGAAATATGATCTACCTCTGGGGGTCCTCCAATCAAGGTTAGTTTCTTTGCAACTTTATAATCCTCATCTTTCTTAAACTCGGCATGGTGTTCATCTTTGCTTATTTCCTTCGAGATTGCAGCGCTCACAGCAAATTCCTCG…	3.836e-24	Q7Z2Y8	RecName: Full=Interferon-induced very large GTPase 1; AltName: Full=Interferon-induced very large GTPase pseudogene 1
LYa_b1_contig_296447 (1..280) consensus	119.377	0	GTCACTATGAACAAACAATTGAAGCAGATGGATGTAGATGGTATGGGAGAAACAAGAGAGAGTTATGGGTGTTCTGGTAAAACAGGAATACTAACTACGACTATTCCTGTTCCTGATAATGACTTTGATATTCAAATTCCTAGAGGAATAAGATCGGGGAGAAGTAATTCCAGGGATAATGATGACCGTAATTTGCGTTATCCTCAACCCCAGACAAATGGAGGTGTAGATGTGGATGTAGACACAGGACCGGGATCCTCTATTCACAATCAAGGAAGAA	4.13038	Q55CY2	RecName: Full=Frizzled and smoothened-like protein N; Flags: Precursor
LYa_b1_contig_5542 (1..2308) consensus	115.558	0	TACATTCAAAGCAGCCTCCATCATATATCACAAGAGAAAGCTCATCAGAAAAGGTGTGTCCGTTATTTGACACGCTAATAAAATAGCCAGTTGCAATAGTGTCATCGTTCACAGATCGACGTCGTCTGCTATTCGGTACAGGACAATACATTAAAAATGAGCTAGAGTAAATCCCAGCAATTATGGAACCTTCGTCTTCGACTTTGACTGAATTATTAGTTGAAACTGTAATTTTTCGAAGTTTACAAGTCAAGTTTGCTGTTGCAAAGTCGATTCCAGGAACTGCTATCTTCTCGCATTTTTTTACAGAATTGTCACAACTTTGCTCAAATGCCATTTTCATTACACGAGGTGCGGTATCACTATCTTTAGAGCAGTCTCCGCCATGATATCCTTCGA…	2.892e-09	Q8N2E2	RecName: Full=von Willebrand factor D and EGF domain-containing protein; Flags: Precursor
LYa_b1_contig_37236 (90..541) consensus	114.428	0	CCTAAACTCAAATTTCATGAGGTGCTTCTTGATGCATTCCATTTCTTAACTGTCCGCTTCTTTATTTTACACCAATCTATGACTGTTTTAAAAGTATGTACATCCTTTGGATGAAACCACGCCCAAAAGACGTATCCCGCATACAAGGACATACAAAAATATCTTATATTTCTCGCGTTAATTTTCATCTTCGTCTCATTCCCTTTATTTTCGGGTGAATGATTATCTGTTTGGTTAGTCATTGAAATAGTACTGTTGTTATTTTTGGTATTTCTTCTGTCTTATGTCGACGACCTACCAAATTATCAGTTTGTTGATCTGGAAGCACTTTTATAAACAGCAAGACATGGTCTTCATCACTGACTCATGAATTTCTCCTTGAAGGAGTCAAAGTTTGAT…	0	not available	not available
LYa_b1_contig_20670 (4..439) consensus	113.997	0	TTTTTTTAAAAAACCAATAAATTCTTTATTTTTTTTTTCTGTAGAAAAATAGTAGATAAAAGCATCAAAAGAATATTGAAGAAGAAAAATGAGGTTTTAGGAAAAAAGTTCGACCATGTTAATTTTATACGAGTTTATCTTCCACATGCAAGCTTAACCATCACTACCAAAGTTTATGTCGGTAATTATTTTCCATTGATACTCCTTCTACAAAGAAACTATTCCTTTGTAGATGTGCTGGGACCCAAACTACTTTAGAGTTTCCACCGTTTCCTCCTGATCCTCCGCCCCATCCACCGCCTCCACCAGCTCCTCCATTGCTGCCTCCTGCTCCTCCTGAATTTCCCATATTTGTTTTTATTTAACTGTACTTTCGGCAAAGTCTTTGTTAGAAGACAG…	0	not available	not available
LYa_b1_contig_148688 (54..909) consensus	106.425	0	AAACGTTTTATTGCTTACGATAAATGACCGACATATTTGGAAACCTCCGGTTACAGCTAAGTGTCCCGAAATATTTATCATTTTTAGTATAAAACGTGTTGCATCTTTTCATTTGTAAATATTATTAACAATGACTTCACAAAGAATCCTCGTATTTCTTGTCTGTGTTTATATCAGTTTATCATATTGTTTAAGGATTGATCGATGCAACATTGGAATTAAGCGACGACGTGTACAAAGAGTTGTGCTGCCATCCAATTGTACAGAAGGAACGCTATATTGGAACTATCCAGAAAAGACTTTAAAAGTGGTTGTTCCAGAAGAAAATGGGAACTTCACATTTTGTGTGGGATATGTTCATGATCCATTTGTAAAAAGAGCACAGATAACTACCCGTTC…	2.48371	Q1CZI7	RecName: Full=Chaperone protein HtpG; AltName: Full=Heat shock protein HtpG; AltName: Full=High temperature protein G
LYa_b1_contig_259494 (35..624) consensus	104.92	0	TTTGAAGAGGAAATAACTTTAATCTTTATCTGAACAATTTGTTTTTAATAGCACTCTACAATTTAGTTGGAATGTATGTATCATAAAATAATCCCTTAATTTATAAATGAGACATGATATTTATTCTAATTTTGTCTGAATAAAAGTAAAACCAAAACAAATAAGATTATTTTTTAAAACAGATAATATAATGGTACACGTTGATAAATGTTTATCTCATGTACATTGTTTTTCCCATAGAAGTCTTAACGATAACTGCCAAATCCATTTATGTGGTCTTTTTCTGTCACTACTTCTTCTGCATAAAAGTATTCCTTGTTGAAATGTGCCGGAACCCAGTCGTTTTCTCTGGTCCTTTTCCCACCATTTCCCCCACTTCCTCCTCCCAAACCACCTCCT…	0	not available	not available
LYa_b1_contig_53621 (287..981) consensus	103.927	0	GGAGGCTTATTTGGTGGACATGGTGGAAGAGGTGGAAATGGATATCGATCAGAGAACAATAGTGTTATGGCCGCAGACCTGAGGGATTCCGACAATACAGTCTTTATATGGATCAAAGGCCTTGTTGATGGAAAAACCTTCATTGAAAATGTGAAAAAAGCAGGAACAATTAAGACTGACAGAAATACGGGTTTTCGATTGGCACTGATTAGGCAAAATGCAGATATGACTGAAGGCATTGTAACTTACGAGGACGTAAAAAGTGTTGAAAAAATTCAAAATAAAGAGTTCAATATCGATGGATCAGTAACAGTCAAAACTGCAAGTAACTACTTGGAAAAAAAAGATTTGAGTAAGTGTTGTTCAACAAGAAAGCAAGGTGAAAATACAGCGTGGTGC…	1.46046	L0GCJ1	RecName: Full=La1-like protein 13; Flags: Precursor
LYa_b1_contig_164535 (1..1645) consensus	103.397	0	CAGATGGACAAAAATACAAGTGGACGTGGCCGGGTACTTGTACATCCCAACAACAAAAAGACACTAGGAACAGATCTGAGAGTACTCGCAGTTATCTGACAGCTAGTTCAAAGTCAATAACAACTAATAACAAAATCATTCATCTAAGACTTAATGTACAATGCTTTATGTTTTACCACTGACTATAAATGTCATTTCTATACTTTTTAATGAATAATGTAGAGTATTGGCTTATTAATCAATTCTCGTGTTATAAACTGAAAAACTTTTGCACACAAAAATTCAATTCAGAAGGCCGACACCAGGTAATGCATCCTGGTTTAAGAAGAAAGGAATATGGGTACAATCTGTCTCAGCTCCTGGAATTGTTGAATTTGTAGTGAAGTCAATTAACGCTAT…	0.0001498	Q7TPV2	RecName: Full=E3 ubiquitin-protein ligase DZIP3; AltName: Full=DAZ-interacting protein 3 homolog; AltName: Full=RING-type E3 ubiquitin transferase DZIP3
LYa_b1_contig_82823 (83..534) consensus	102.745	0	TAGAACAAACATATATACATAGATGATTTGATTTACTCAATGTGTATACTAAAAAAACAAAAATGTAATTTTTAAGGGAAAAAAACACACATAAACTAACTCTCTGTCCAAGCAGGTCCCCTGTTTTTTTATTACAAGGGACACTTGTGAAACGTGGAAAATAATGACCTCAAACGACATTTCTATTATTTTGCAGGATAACGTTTTTGTTCAATTCAAATCGTATTTTCTGAAGATGTAGATTAGGACATGTTTAAACATGTTGAAGTATGTCATATGTCATAATATAGAATTTACAAAATGCCATCCAGAGGCTGAGCAATCTTTCCATCAGATATCTCATTTAGTAAACTGTAAAAATTCCTGTCTAACCTTTGAACAGGAAAAAAACCAAACTTT…	2.2037	A4IG72	RecName: Full=Transforming growth factor-beta receptor-associated protein 1 homolog; Short=TGF-beta receptor-associated protein 1 homolog
LYa_b1_contig_62658 (1444..3530) consensus	99.9607	0	CAGAGAAATAACAAATCGCAGTTTTACGCTTCTAAAATTTGAAAGTAAATTGATTATTTTTTATCCTTTCTTAATATTGCATTTTCACAACTTTAGAACACCATCTAATCGGGCAATCACAGTCATCAGATTTTTTTTATACTTTGTGGTCTTTTTGATACTCTGGAAGTATTTCCGATACGAGAAAACCTAGGGTGCATCCATCACCAAAACACAAATTTGATTTAAAAAGACATAAATATCGTCCAGAATCGACAACGTTGAAAACGTAAGAAAATCGCCCAGTGGACAAACTTGCTAAACATTGTTTTTGTTTGAAATCGAAACCGTTTTGGCTACGTAAGTTATCCAAAGGTATGCAACTGTTTGGTAGAGTTAAAGTACAATTACGGATAAGCA…	5.9465	Q8TF05	RecName: Full=Serine/threonine-protein phosphatase 4 regulatory subunit 1
LYa_b1_contig_173314 (123..637) consensus	98.3287	0	TTAAGTATATAAATTTTTGATAAAAACCGATGCAATTGGCAGGTTAATAGGTGTTTACAAATACAATTATAAAAAATGTACAAAAATAAAAGTTCAAATATCGATAAAAATTAATACACATATCATAACAAGCTTTAAAATATCGGCCCCGGTTATCATCCCGAGACTCCCATACCAGTCCAGGGCACCAGTCGAGGCTCCGATTTGGGTCGCGGGATGATAACTAACTAAACACGGAAAAAGGCTATTATGACAAAGTATATCAACCTGTTTATTAAGTACTAACGTTTTGGACTTGATTTATTGTAAGCCTTGTGTCTGCTGACATGGGCTGCTTCGTTTTCACTATACTAACATTGCAAAAAATTTAACACATTTGTGTTAGGTATGCGATATAAA…	0	not available	not available
LYa_b1_contig_98763 (154..1355) consensus	97.9424	0	CCGAACAGTTATTTATGATAAATTTGAGTCCTCGTATTTTCATATTTTCTAAGCGATATTGGATCTTAAGCACTATCTAATCCTCTTGTAAGAAGTGTAAGATGAATTATCGTTTTATTATCTTTTTCTGAACGATCTGTTACTTTAAATGCACCCCCTGCTGGATAAAGGCGTTCTTCTTCAGCAAATCTAGCGTAGTCTTCAATATTTCGAGGTTGCCATTTACTTGCAGTTTTGTTATCAATAATGAAAGTCACAGGATGTTCCCCTGTCGGTACACACGTTGGAAATGGTTCAGCCTTGGTTAAGTCATTTGATGAGGAGACAAACGACAACCAAATAAATTGAGTACCTTTCTGATACATACGGCAATCAGTATCTGTCATTAACATACGGCGG…	0.005047	Q6AWW5	RecName: Full=Ankyrin repeat-containing protein At5g02620
LYa_b1_contig_10343 (1..340) consensus	97.1387	0	AGAACGTCTTTAATATATTGACAAGCAATAACATTTGTTTTCTTTATTGGCGGAGTAACTGAAGATGGTGGCCCATTTATCTCAGTTTTTGGAAGGTTTGTTGACTGGTCTTTGTTTGGTGATATATGAGGGATGATGAACACCATACATGTAATAACAACCACCAGTAATATGGCATTCAGGATCAGCATCACGGTGAAACTTATTTTTAGTTTATGATACGAAAGCACAATTTCGGTATATTGTTTGTGAAGCTCGTGGTATTGAGACGGACCCAACAAACTTTCTGAAATACTCTGTTTTGTCATTCTTCTGGGTCCTAAATCTGGCACTTGGTCTG	3.29323	Q942X4	RecName: Full=Succinate dehydrogenase subunit 4, mitochondrial; Flags: Precursor
LYa_b1_contig_8018 (1..1498) consensus	95.9067	0	GTAAGTGACCTCTATTAAATCAGTGGTATTGGTCACTTCAACATTGCCATCACTCTGGATCACAGCAATAAGAGTAGGATTAAGTCCCGGAGATGTTCGATAGGTCACATTTATCATCGTAAAGGTGGTCGCATTGACAGAACACACTATCACTCCTGGTCCGGTATTTATCAAAATCATGGAATCTGGACAGGAAACATCAATAGAGGGTTCAGGTACAGTGGTTTCAGGTGAGGAAGCTGTAGTTATTTCTGAAGGGCAAATTGTGCTATGACAGTATTCACATCCAACCGTTTCATAAATTCCGAAACAGAGTGTGCTTTGACATGGTTTGCCATATTCAGCATTGCCCACGCACCAGATGTAGTAATGACAGTTTGTTATATGTGGATTATAGGT…	0	not available	not available
LYa_b1_contig_21136 (8..1138) consensus	95.6582	0	TTTTTTTTTGTTTTTACAATTGCTTTAATGTAAATAGTGCATTTAGAGAATTATATATACAAAATATGAACATTTTCTTTTTTTCAAACAATGAAAATGTAAAATAATTACCAGATGCAAACTTCAATTAATTCAGTGTTTCCGTTACGAGCTATTTAATACAGTACCACATGGTTAACGGCTTTGCCCAGTCATGTTTCTTCGGGTTGACATATGTTTTGCATCTACATCAAGACCATATCACTATTGTATGAGACTACACGTGTTTAAAGTATACGATATTGACACTTTCTATATCATTTCATTCATTTTGATTAATTTTACAATTTAGATTTGGAAAGTAAATAACCGTTGTAGAACTTGAACGTTATACTTCTTTATCGTCGAGAATTAATGTCG…	4.35668	Q2NU35	RecName: Full=Thymidylate kinase; AltName: Full=dTMP kinase
LYa_b1_contig_17068 (12..869) consensus	93.2515	0	GTCAGCATGTCTATAAAAATCCAGTTTGATTTCAGTCTTTGTCCCTTGATGTATTGCATTTTATTAAAATATCATAATGCACGGCATCATGTTAATTGTCCCATCATACTTTGATCCCACAATGCACTAGCTGTCTATCCTCACAAAAACTTTTGGTTTTGAAAATATCTTCTTTCCCTCATCAATTTCTGATAACTTTGCCTCTATTTCTTGTTTTTCTGTCCTTAGTCTAAATGTATCCATTCGTAACGGCAGACCAGATAACAGCTTCATCAGTTCCCTTTCTCTTTCTTTCAACAGATTCAGGGTCTGCAGCCTCTCATTTTCAGGTAAAACTTTATGCCCTGGTGGCATAGCTGGATCAGGTGTGTTAGCTATTCTATCTTCTTCGTCTTTCTT…	4.934e-39	Q7TSV9	RecName: Full=Enkurin domain-containing protein 1
LYa_b1_contig_15874 (8..638) consensus	93.1875	0	GCACAGAATGGTTTTTCTCTTTCCAAAAGTCTTTTTACAATCTCTAGGCTTGTACATTGCGATCCATTTATAACGGGACCCATCACATAAGCTGGATTTATTACTGCTAGTTCTATCTTGTCTTCATCTGGTAGCTCTTTGACATAGTCCCAGGCTGCTTTTTCTGCTAAAGTTTTACTTTTACCATAGGCATCTAATTTCTCTGGATCTGTCCAATCTTCTTCTGTAAATACTTTGTTTGGATCGGCTGCTAACGCTGCTGGACCCCATCCCACAGCAACACAGGAACTTGTTATAACTACACGTTTGACGGATTTGGCTTGGACACATGCTTTAAGAACGGCTTGGGTTCCTTCGACAGCAGGCTGAACAATCTCGTTTTCATCCTTTGGACTTTGT…	6.111e-37	Q9UT59	RecName: Full=Putative uncharacterized oxidoreductase C513.07
LYa_b1_contig_21044 (1..1490) consensus	92.0506	0	CAGGATATGTTACAGATATGTGGTTAAACATTTGAGCATCAATTCAATTGAATAGCATTATTAAAATACAATATTAGAAGACAACCAATTGACTTTGGGGGTCCGGCAGAAATCGTTTTAACTTGTTTTATTTGTATTTTGAACACATCTTGTTCCTGCGTCTTGTTAGCAGAAAATGTTCAATATGTTGTTCCTTTCTTACAAATGTAACAGGTATGTATATATATATTTTTCCAAAACATTTTCTTCCACAAGTTCCCACCACTGCCGAAAATCAAATGGTCATCCTTTAATGTATAAAAATTGATAAACATAATTGAAACATCGTATATCACAATCAACAACGTTTCACATTGACTAGTTACATAAGAGATCAACATGAAGTATAGATAGTTATAC…	0.848103	P41047	RecName: Full=Tumor necrosis factor ligand superfamily member 6; AltName: Full=CD95 ligand; Short=CD95-L; AltName: Full=Fas antigen ligand; Short=Fas ligand; Short=FasL; AltName: CD_antigen=CD178; Contains: RecName: Full=Tumor necrosis factor ligand superfamily member 6, membrane form; Contains: RecName: Full=Tumor necrosis factor ligand superfamily member 6, soluble form; AltName: Full=Receptor-…
LYa_b1_contig_4262 (1..296) consensus	91.977	0	TTGATGTAATGTAGAAATATGGTTTGTTTGCATTGATGCGTTCGAAAATAAATGCGTTGTGTTCACCAAAATATCCTTTTGTCCCATGAAGTTGACCCTTTGCATCAAACCCCATAGCAAGATACCACTGAGGCCATCTTTCAGGACGTAGAGAAAAGGAGCGTACTGTACAATCAACTTCTTCAAGAAAGCTAAGTTCGTCGGATTCTACTGACAGTACAAACACTGTCATAATTGCGAGAAAGAAAACTCCTCCAGCCATTTTTTGTGGTGGAAAGCTTCTAATTCTATATAAA	0.896955	Q9WY68	RecName: Full=Putative 1-aminocyclopropane-1-carboxylate deaminase; Short=ACC deaminase
LYa_b1_contig_58517 (404..1219) consensus	91.7771	0	GTCAGGTTATACGCAGAAGTATCTATACAGTTTATTTGGTGTATGTTCTTTCATATTGAAATGTTATACTATATCAATGATTGAGCAAAGCTTTATTTACCAATGTCTTATCCTATGTAATACGTTATTCAGAGGCAAATAAAATAAGACACCCCATTTCAATAGTTCATCGTGATACCTGTCACCAGGAAGAGGTTTGAGCAATTTTATCACAGTTTTGTCATTGTTTACTGGTTGTCCAATCTTGCTCCTAATAAAATAGTACTTATTACTGCATTTTGTCAAAAGCTTTGTAAATCGATCTGGCAGATTTTCGATGTAGTCATCATGTTCAACTCCTTTACTGTCTAAATGTTCAGCATGTGTAAAAGCTATTGAAATCTTTTGATAGTTTTCACT…	0.006645	Q9T0F3	RecName: Full=Immune-associated nucleotide-binding protein 12; Short=AtIAN12; AltName: Full=AIG1-like protein
LYa_b1_contig_244492 (1..3319) consensus	90.7181	0	ATACTTGTTTCTATGGGATACAATCTTATAGAAAGAAGTTACAGCTGAACAACAATTATTTTATATCTTTTCCACGTGTCATACACAAAAATGTGTCTTTAACAAGAGGCGTTATAGATATTCAACTGTATATGAAATATGTGTTTCCAATCCCGAAATGCCATGCAGTCTTAGTGGGAGAAAACATAACCAACTCTCTGATAGAAAAGACATCAACGGATGAATACTTTTACGATGTAGAGTTATATATGTTCCACCGTATTGATCAATGCAATGGAAATATCACCATATATTGCAAAGTTGGAAACGAGCAAATTACAGTAATGCATGAATTCATTGGCAATTGCACAGATATGCATAATTCACAAGGCATACACTGGAGTGCTCAATTTGCGGCTA…	1.43e-12	Q23551	RecName: Full=Twitchin; AltName: Full=Uncoordinated protein 22
LYa_b1_contig_15031 (1..638) consensus	88.1828	0	ATTTTTTTCCGGATGAATCATGTTTACTGCCGTTTTGATCATCTCATCAATTCCACAATCATGTTCCGTGGATTCGTTCTCTATTGCAAAGTAAGGTATTTTGTTATAATTTATCCAGCTTTTAATTGTTGGTGTAGTCTCCAACCATGATTTAAGATTACTCTTCTCATCCGATCCAAATCCTGCAAGTTCATTCTTTCGAGTAAATACTATCAACGTTCTACCATTCATAATGCTTCGAAATTTTGAAAGTATGTTTCCAATAACAGCTTTTTCATCTGGAGTAAATCTTCCAATTGCAATAACAATTGCATAAACTGCTGGGGTTAGTTGGCGCTTTGACAATTCATCTTTTATAGCCGTAAAGGTTTCTATTGACGAAAGCGGTGGCGTATCAAC…	4.281e-15	Q6P9H5	RecName: Full=GTPase IMAP family member 6; AltName: Full=Immunity-associated nucleotide 2 protein; Short=IAN-2; Short=hIAN2; AltName: Full=Immunity-associated nucleotide 6 protein; Short=IAN-6; Short=hIAN6
LYa_b1_contig_3253 (1..274) consensus	82.2999	0	AGGTTGTAGATATGTAACAACTTTAGCCAAGAGAAAATTAGGAAAATACGGTCATGTATACGCAACTGGTGTTGCATCTTCAGGAACTGCTTTGGTGGCATATTCGAAGAAAACGGAGAAAACAGAACCGCAAAAAGAAGATTTACTGTTCCGAGTAACAAATACTAAAATAATAATTTTACCAAAGCAAAAGGCAAACAGACTGTTCAGCAATCAACAAAAGATGGACCCCAAGCAAAAGGCAAACAGACTGTTCAGCAATCAACAAAAGATG	1.32395	Q6AEP2	RecName: Full=Ketol-acid reductoisomerase (NADP(+)); Short=KARI; AltName: Full=Acetohydroxy-acid isomeroreductase; Short=AHIR; AltName: Full=Alpha-keto-beta-hydroxylacyl reductoisomerase; AltName: Full=Ketol-acid reductoisomerase type 1; AltName: Full=Ketol-acid reductoisomerase type I
LYa_b1_contig_7191 (101..407) consensus	81.6994	0	TTAGTTTGATATATTATTATTTCATTCAGTTATAAGGTACGCTGAAAACATTGACCAGTGGCTGCCAAATACCTCCTCGCCACTTGCATTGTCATGGCGTATTGTCAGTTTATCACCCGTCGTTAAGTTCATCACAGTATTCAAAGTCCCTTGCGACCAGTTGGTTCCAAACGCCCCAACATTTGACTGACCATTCTTCCACATATGACAGTGTAGATGTTTTCCATTTACAGCCATGAGAGAACTTGACACCAAATATAGACCATCCCTTGGTACTGTGAATATACCTGTTGAAGGATCATAGATA	2.647e-05	Q05306	RecName: Full=Collagen alpha-1(X) chain; Flags: Precursor
LYa_b1_contig_19243 (990..1603) consensus	81.5401	0	TTTTCATTGATAATCTGGATGATCTGTTCTAATCCATCAAAGTTTTCTCCTTCACTTTTGTTACTTAGGCATATTTGTTGTTTAGAATTAGGCATTAGGGTACTAATTTGTGAACTTTCTTTGATTTTATCACAGCTCTTATCCTTCGACCTATCACATTTAGTGAATGCTACTAAAGTAAAGTCATGAACCATTTTACCAAAGTATTTTTCGAAAGGCTTAAGAGCATCTGTATAATACTTTGTAACTGCTTCAGCTGGAAGACACAACAGAATAATGTGTGGTCCTGGTGAAGAAAGTGCTATCGCCTTGTCTATCTCATTTTTAACATCATCGTGTTTTAGTTCAGTATTACAGACTGCAGGCGTGTCAATGATATCAATTTTGTACTCACATATT…	2.712e-19	Q9NUV9	RecName: Full=GTPase IMAP family member 4; AltName: Full=Immunity-associated nucleotide 1 protein; Short=IAN-1; Short=hIAN1; AltName: Full=Immunity-associated protein 4
LYa_b1_contig_48576 (511..1478) consensus	80.5602	0	ATTTTCAAAATATGTGGAAACCGCAAAACACTAAAAAGACCTGAATCAACTTTTTACTAAACTCATCCCATGGAAGAGGTTTAAACAAGCGTTTAACATTTGATTCATTTTCATTGACATCACTATTAAAAAACATGTATTTGTGTCCACATTTTTTCAAAACGTCATTTAATGGATCTGGTAGATTTGCCAAATATTCTTCTTCATTAGTTATTTGATCATCTTTAAAACGTTCAGAATAGGTAAAAGCAATTGCAACTTGTTCAAAGTCTTCTCTTTGGCGGTACTTGAGATACGTTTGTAATAAATTCAAATCTTCAGTTGTAAACCGATCTGAAACGGGAAAACAAAATAGTACACTGTAGTCTTGTGAAATTGAAAGAGTTGACAAATCCTTTG…	0.0158984	P54120	RecName: Full=Immune-associated nucleotide-binding protein 8; Short=AtIAN8; AltName: Full=Protein AIG1
LYa_b1_contig_12385 (57..483) consensus	80.4429	0	TATTTTATCGCTGCTTTTAAGAATTCTTTCTCAGTAACGCGAAAATTTTTGGTCCTTCCAGACTCACAATTTCTGTAGTATTTAATGACTCAAATCCAATCGGCATTCCTTTAGTCATCTTCAAGTTGAATTCACTTCCGTTTGGCGTTGAAAACGTTATAATTGAGTTGGTCAGGTATAACGTGTTGTTGATATTTTCAAGCGACGCTAATTCCATGAAAATCTTTTTAACAAATTGATTATCTGTAAAATTTTTGATCTTGCCTAAATCGTTATGTTCCATTAGGAGTTTATTTTTCTCTGAGTAGAAATTTGATCCACATACTCTTTTTGTCCTTTCTGTTTGAGAAACGTTCTTGAAAGTGTCACACATTGTACATGAACAATTCATATCACGTA…	4.09106	Q9CP24	RecName: Full=Zinc import ATP-binding protein ZnuC
LYa_b1_contig_46798 (1..1485) consensus	78.744	0	AACTATTGTCTCATTTTTTTCCTCACAAGCAACTATCAGAGGTGTCCGCCCAAATCTATCTGTTTTGTTAACATCAACTCTTTTCTCTATTAGCATCTGAACTATTCTTACATACCCTTCTTGACAAGCAGTTGTTAGAAGGGTGTTTCCTGACTGTTCACGAATCCCATATTCTACTAGCAATTGCACGATATTTTCATTTTCCTTCTTTCCAGCAATTGCCAGAGGTGTCTGTCCATGTCCATCAGCCACGTTAACCTCAGCTTTATTCTCTATCAAAATCTGTACTATTTTTTCATTACCCTCATTACAAGCAGTTGTCAGAGGGGTGTCTCCATACTTCCCTACCTTGTTTACATCAACCCCATATTCCACCAGTAATTGTACAATTTTTTCATT…	1.364e-45	Q9ULJ7	RecName: Full=Ankyrin repeat domain-containing protein 50
LYa_b1_contig_15919 (117..3130) consensus	77.1151	0	TTTGAACAAGTTTTCAGGCTGTGTATATTTGCAATGAGTTCTAATTTGTATTCTTAAACAAAAACATATATTATTTTATTGAAATAACATGTTCAAATTTCCACTATTTGTAAGTCTCCTCTTCGTGAAAGGTGTGTATCAAGTGGAGCATGACTCGAAAAGTCATACTTTAAAGCCAAGAAATCATCGTGAAATCGCTCCTTTGCTGAATAATCTTTTTGTTCAGGAAAATCCTTAGTTGCTTTAATGTTGAGAGTATTAATTTTTCGGGCATCTAGCTTTGGTCTTACTGCTCCACGGTACAGGCAAATTACAAATATGGATATGCATACAAGGCAGGCTACAACTATGCCAGCTACAACTCCAATGGCAATCTTTTCTGATGTTGACAGTATACTT…	1.244e-34	Q0V8J4	RecName: Full=von Willebrand factor A domain-containing protein 7; AltName: Full=Protein G7c; Flags: Precursor
LYa_b1_contig_209850 (1..343) consensus	73.1404	0	GTTCAAATCAGCAACATGCAGAGCCAAAACGAGACTTCCCTACTTCACGCCCGCTACAAATGGCATTCCAGGTTCAACCACCGGTGCCATATCATCGGGAGCCATTACCTACGCATTTACCACACAGGGAATTCCCGCTTGATCGAGAACAAAGAATAAAGAAAAGTCCTGATGGGCATGCCTACCCCTAATGTCAATGACTGCTGGCGGAAAGACGCTTTCGAAACACTAAGGATTTAACTATTCGGAATTTTGGGCCATCAATGTTTTTGGACTTTTTATAACTTTTTTTTTATTCAAGCGTCATTGATGATTCTTTTGTTTACGAAATGCGCGTCTGGCG	5.68654	O42182	RecName: Full=Fibulin-1; Short=FIBL-1; Flags: Precursor
LYa_b1_contig_103009 (301..1268) consensus	72.5195	0	CCTCCTCCCTTTCCTCCTCTTCCGCCTTGGCCCCCTGAACCTGGTCCTCCTGGTTCCCCATCTTGGCCTCTAAACCATCCAAAAAAACCGGAACCCCCTTGTCCACCTTGACCCGCTCTTCGATCCTGCTTACCATGTTGCCATCTCCAAAAACACCAAGCTGTATTTTCACCAGGTTGTTTTGTACAATAACAAGTTGTTATATCTTTCTTTTTCAAGTAATCTTCTGCAGAAAAAACCTGAACTACTTGACCCATCGACTTTAATTCTTCAAATATTTTCAAGGCATTTTTGACGTCGTGTTTTTCATCATAAGTAACGATACCCTCTTTTGTACGTTCTCCATTGTTTGTTTTCCGAATTTCCGCCTTTCTTACTGCTGTTTCTTTGTCAGTCTTG…	0.709904	Q7NY13	RecName: Full=Translation initiation factor IF-2
LYa_b1_contig_24034 (1627..3299) consensus	70.8024	0	TGCCTTTATTAGCTGCTATAACCATATCCTCTTCGTTGTCTGCACTGAATCGAATATATCTGAATACACATTTGATCATAATCCAAGGTGTAAAACAACACTTTTACTGGTTATGAAATTACTTTCCTCGTTGTTTTGCATTAAGATTATACTTCCATCATCTTTATCCATTTTGAAACATCAACCATAGCATGCATAGGTAAGTTAATAAACGGAAAAAAATACTAAGTATTCCTAGCGTATCCAAAATAGCATGATACATATATACTGTGTCATTTAGCAATACATGTTGTTTACTTTAATCTGTTCTTTATTTTTTTCTATTGTTTAAGTTGAACTACTGTTTGAAGGGGCCTCATGCAAGATCTTTTAAATAAAGTTTATTAACAAAATAATCTA…	3.00477	Q552J0	RecName: Full=T-complex protein 1 subunit theta; Short=TCP-1-theta; AltName: Full=CCT-theta
LYa_b1_contig_89449 (1..1029) consensus	68.9184	0	ACAGTAATACCATATTTTTCTCTATCTGAAGGAATTTTATTGTACGCAATTGCTTCACCATTTGGTATTCTAACCCATGCCATTGGTGCAGAAATATCCTCTGTCTTAATCGTGCATTCAAGATCAGCATTTCCTCCAAAGTATACAGGTTTAGTCATTAGTTTCCACTGAATCACTTCGGATGTGGTTGTATTGATGGCTTTCGCCTCTTGCAATGCTATCAGACAGATAATCAATAGATATGTCGTAGATTTAAATACGGGTACAACTACTACTGCAGAGTTCCTGTTCATAAAATTTTCTCGAATTTGTATCGTCCTTATTATGTTTTCAATTTGGAGTTCAGCTTCTTTGTTATCCTGAAGCTGACTATTTATCCGAAGAATGGGCATTTTTGAT…	0.0006506	Q6MUE7	RecName: Full=tRNA modification GTPase MnmE
LYa_b1_contig_31510 (1..846) consensus	68.8921	0	CGTGATACATCTTGCAAAAGCTGCAGATATTCATTTTGCAGTTGTTACACCAATACAATGCATTATTCTGGTCGATGCACATTTGGCATTCAATAAGTTGCTGTTTTGAAAAACGGTATTGTTTTTCAAAAGCTTCATCCCCGATTTGCACGGAAACACCAGCTACCTCATCATTCACCACTGTCAACAGTTCACTACATAAACCATCATTGCTACCTGATAATTGACACATGCGCTTGTATGCAGTGTTCATGAGATACTCCGTTTGCATTTCCAACCATATCTTTTGATCATCTGAATATCGCACAGAGCTTGCCACAAAAGCAAACAGCTGATCACAATATTGTTCAATCTTTGCAACCCTCTCCAGTACAACTTGCTTTTCCTTCCATGGTACGT…	1.25444	Q9BX63	RecName: Full=Fanconi anemia group J protein; Short=Protein FACJ; AltName: Full=ATP-dependent RNA helicase BRIP1; AltName: Full=BRCA1-associated C-terminal helicase 1; AltName: Full=BRCA1-interacting protein C-terminal helicase 1; Short=BRCA1-interacting protein 1
LYa_b1_contig_20174 (1183..2363) consensus	68.6627	0	AGGACATTAAAGATCACACAAAGGTTGCTCATATTTTAAATAAGGTGTGCATTGTGTTAGAGTAAAAATCAATAAACAATAAAGAGCTTAATTGTAATCTCAATTTCTAATGCACAATTGGTTAAGCAAATTATACATGTTTTATCCAAAGTTATGACCGTTGGTTAACGATGGCTGTGTGTGCTTTACGATTAACGTAACATTTAAATAGTATGTATAGTGAAGAGAACAAGAAAAAAATGTGAAAAAAACAGACACAGTTGAGAGTCGCAAAAAATTCAAATTGAAGACATACTATGCTTTTTGTTTTTTTGGTGGTTTCTTAACACACGTGATGGATCCATCAATCCTTTTTGTGACTTTAATGGTTCCGGTAATTATGATATATGGAATCCCATC…	0.62944	O66455	RecName: Full=Imidazoleglycerol-phosphate dehydratase; Short=IGPD
LYa_b1_contig_14517 (1..2743) consensus	67.6321	0	AACACTAATGTTGAGGTTACCTCCAAGTGGCAGTCCTATTTTATTTGGTGGTCGTGCCATGTTACTGTTCAATCTTGGTGAACAGTTTACGAATAGCTCAACCTCTTTGGTAACGTTGCAGGCTTGTTCAAAAATAAAATTTGTAGCTGTGCAACTGTATATTCCTGTTTGGAAACAGGTTGCCTGGGTAATGGTATAATAGCTCCTTAGAGCAGTGAAACCTGTGTCTTGTAATACTTCATCTGTAAAGGTCCATGTAATATTAGGTTCAGGGTAGCTTTCGACTTCACATTCCAATAATACTGATGAGTTTTCAAGAACTGTACTACCATTCAAAACCTTTAAACTTTTGATAGTAGGTCCATAGAGAACATTGATATTTACTGACGACGTTCCATT…	2.969e-34	D3YXG0	RecName: Full=Hemicentin-1; AltName: Full=Fibulin-6; Short=FIBL-6; Flags: Precursor
LYa_b1_contig_295893 (1..817) consensus	66.6852	0	TATTGAACCTAAAATGCATGTGCTCCACATACGGCACTTTTGCAGCTGTAAGTGATCTAAGTGCTTTTATTTCACCGCCATCGTCGAATGTTATAAGCGGAATGACATAATTTATGTCTTTGCCAAACATCGATAAGATGTTATCAAAAATACATCTATGTTCTGCGGTTAGTCTACAGAATGATGGAACTACAATACAAGCTGCACTGATGTACTCAATTGATCGAAAGAGATTAATTAGCTTTTTGTAAATAATTGCACTATTTGCGGGCCCAAATCCAGGAACCTCAATTACATTGAGGTTGAATTCGATTTTAAATCCATCTTGCCATCGAATTCTGTAGACAACTATACCTTCTGTTTGTTGTGGAATCATAGTTGTTCCTCTCTCATTGGTTA…	0.0002919	Q9C8V2	RecName: Full=Immune-associated nucleotide-binding protein 7; Short=AtIAN7; AltName: Full=AIG1-like protein
LYa_b1_contig_24034 (1..1093) consensus	64.8614	0	CAATTTGATTTCAACACTACCAATATACCATATTTTTATTTCTCAAATATTTTTCTCATAATTTGGGATGTCTCCTGTAGCATTAATTTGGTTCATAATGTAAGTTTTAGTCTTTGTTGCTTTTATGCGTTTCTTTTTGCAAGAGATGCATCATCGTCCGTCTTTTCAAATTCGACCTCTTGTGTTGATCTCATTCTTCCTAACATCAACTTTAGCTATAAAAAAAAATGAAAATCAAATCAAACAATGCTTCTTATACTTGATAGATCATGTCGCATATAAACACGAGTAGAATAATTGTACTTTCAAAATATAGAGAAAATCGTTCATCTGAAGTTAATCTTTTATGAAATGTTGAAGTGCAAGCCACATATTATTCGTTGAACACACACGCTAATC…	0	not available	not available
LYa_b1_contig_19985 (88..2156) consensus	63.5448	0	ATCAACAGAAAAAAGGTTGAAATGTAAAATGAGGTATGAAATAATTTTTTGCTTTTTTAATCTTTTTTTATAAACCAAGTAAACTTCATTTGCTCTTTTTTAAAGGCATTGAGTTTAATTGTTCATTTTCATTCAAATTAGCAAATATTTGTCTTCAATTGTCTAATTCGTCTTCTAGTTGGCTTCTATTCAATTCATCTTCGTGTTCTCTTTCCAAATCAGCCAATCCCGCCTTTTGTTGCATTTCCAAATCAGCCAAAATTTCTTCTTGTTTTCTTTTTAATTCTTCTCCTTGTTGTCTTTCAAAATTATTTCCTTGTTTTCTATCCATCGTCTCTTCTTGTAGTATTTGCCTTTTCAGCTCTTCTGCTTGATTATTTTTAAATTGAGCCAATTGTT…	0	not available	not available
LYa_b1_contig_69862 (77..804) consensus	63.0471	0	CGTCATGTTCCTTTTATTTTCATTTTTGCACTTTCAATTATAAAAATTGTTCATTTTCATACATCTGTTATTTGGGTCATCCATGTCGATAGATGTAACCCCAGGACAGATCGAGCATTGATATACCATTGGTGAAGTAATGTGCGTATCGTTGCAATCCGTCAGTATCTTCCTGTTGTTTCTAGTTGTAACTTTTCGGCATATTTTCAGATGATTGCAATTTTCCCCTGTATCCATACCAAGAGCCATAATTGGTTGCGCTCCGTTGCAGCTAGTCAAAGCAGTGAGTGCCCTTTTAATACGGCCACCTGCAGATCGTGTTATATTCAATACGTTAGCATCTTCTGGTATCTTCTTTTCCTGATAAATAGGGTATCTAAAATCCTGGTAAAACTCTTT…	2.64655	P48844	RecName: Full=Orotidine 5'-phosphate decarboxylase; AltName: Full=OMP decarboxylase; Short=OMPDCase; Short=OMPdecase; AltName: Full=Uridine 5'-monophosphate synthase; Short=UMP synthase
LYa_b1_contig_24319 (213..1457) consensus	60.8613	0	TAGTAACAGATATTGAAGCAACAAACAGCATACTAATCACGTTCATGATTCCGGAGGGATATTCTAATATTATACTTGAACTAAATGACAAAGACAAGGAATATTTAGGATCCAAAGGTGTAGACGCAGTATTGTGCAATGGAGAAACGATCAACTGCATAGCTAATCGCACGACTGGTCAGGAAGAATCGATCAGTAAGAATGAAGAAGTTATGTTGCTACTGGATCAAAGAAGTAAAGTAGATCAAGAACTGGAATTTCTACAACAACAGCTTTTAGAAAAGGATAAACAAATTCGCAATTGTCAGAAGTCCCTTCAAGAAATTAAGCAACAGGTAAACTGGAAAAAGTTTGAGGTTACATCGGCCCTTATTCAGCAGTATATGGAATATAGATACA…	0.16138	O77245	RecName: Full=Nuclear hormone receptor E75; AltName: Full=Nuclear receptor subfamily 1 group D member 3
LYa_b1_contig_2570 (234..1155) consensus	60.0818	0	GTCGTTGATCAAATTGATTTGTATTGCGTATACATTTCGGGATCACCTTTTTGACAGCTTTCAACAATAAATATAAATGAGCCTCATCATGTACAGCAAATTTTATTATAACATGGACGCTTTCTATTTCATATTTGACACCATCAAATTTGTATGATTAGTCATAAAATTAAACAGAACTTCCGATTAGATTCCTTTGCTTTCTCTTCCAAAGCCCTTTCTAATCTAGCTACTTGATCTTCTGATATTTGTTTTTGTTGTAGTAATAAGAAGTATTCATGGGAATAGTAACCATCCATAGTTAAAACTTCTTCAGCGACTTCCTGTGCGTATCTCTGCTTATCACGCTCCGATGATAGATTTTCTACCGCAACAATCCGTCTACCACACTGCATATAC…	7.731e-26	Q8NHV1	RecName: Full=GTPase IMAP family member 7; AltName: Full=Immunity-associated nucleotide 7 protein; Short=IAN-7
LYa_b1_contig_95457 (1..1574) consensus	59.1966	0	AAAATAATGATCGAAACTTTTTACTGGGTGGTGTTCCTGGAACAAAGTCCTCCTCCTCCTCATCTTTCATGTCTTCCTGTAATGTTACATCCATGGCACTTGTATCAAAACACTTTGACTGATTTGGAACAACAGGGCTCTGTGACTGTTGTGTTTCATCCTCAGGACCAACCATATGTGTTGATTTATTTAACCATCCACCGCTACGAGAGGTTGAGGGTTGAGGAGATCTTTTTCCAAAGTCAACTTTATTTCTGTCGGGATTAAATAATGTACGTTTTCCCGTAATGACACTTTCTTCGGGTAACATATTTTCTTCTCTGTTTGACAGAGTGTTTTTCCCACTATTCATGTTTGTAACAGAGTCTGAAGTCAAATTATGTAATCTTGCATCACCAT…	9.635e-85	Q99638	RecName: Full=Cell cycle checkpoint control protein RAD9A; Short=hRAD9; AltName: Full=DNA repair exonuclease rad9 homolog A
LYa_b1_contig_41737 (17..1250) consensus	57.7977	0	GTCAGCCTTTTCCCGCCTAATTTTATAAATCAAATATCTCGGAAAGGAGCTCCATGACCTATCAATCTTTTGGACTTTTTTATCCTGAACTAATACTCTTCCAGCTTAAAGTATCAATTTTGAATCCTTGATTTATCTAATTTTATCCTAGATCGCCTAAGTACATCCTGAAAGCTAATATTCAAGATCGCATTCAGTAAATCTATTTACATCATTTTCAAACTCTCGAACTTTGAAGTACAAATCTATAAACAACAACAGCGTCATCTCTAAAATCGCGAAGAGTTCTGCTTAGATACCGGTAAGTAAACACTGCTGATGTTCCTGCAGAAATTATTGATCCAATTATAGGCAGAAAAATATCTGCTACAGATTCAACTGCTAATATGGCTACCAATT…	1.089e-26	Q6AYF9	RecName: Full=Interferon-inducible GTPase 5; AltName: Full=Immunity-related GTPase cinema 1
LYa_b1_contig_46798 (1740..3853) consensus	54.7552	0	TTGCTACTATTTTTGCGTTTCCATTGTTAAGAATTTTTTTAAAAGTGTATATATTCACCATTAAATATTCTAGATCTGAAATACTAACGTTGTAGCGTCCACAAATGTCTTCCACTAAGAACAACTGTTCACCATAAAGTTGATAACGGTGTAATACATCTTTTATTCCTGTACATTGAACTTTCTGATATCCCAAATTCCGCTGTAAGTTCTCAGCAATATGATGCATCAACATACTTTTACCAATGCCAGGTTCACCTACTATTAAGACAAAGGGCTGTCTTTGGAGAATCTGTGACAACTCATAAGCTACAGGTGTTTCAACAAAAATAGTATGTAAATCACGATATATTGGTAAAAGTGTAGCATTGATCTCTTTTCGTTTTTCTTTTCCATTTG…	0.007153	Q6BJJ8	RecName: Full=Lon protease homolog 2, peroxisomal
LYa_b1_contig_296812 (19..900) consensus	54.3659	0	CTTTAATAATTCGTCTTGAAATAGTAAACGAACATCAAACTTGTAATTTGTACAAAGAGTTTGTTTCAATCCACATACTCTGTGAAACAAGGCAAAATTGTAAATCATTGACAATTTTATATTATTACAAACGTCCACCTCCTCTGCCTCCCCTTCCACCTTGACCTCCTCGGCCAGGTGCTCCAGGTTCCCCATCCTGACCTCCGAACTGTCCGAATAAACCGGATCCTCCTTGCCCACCTTGTCCGCCTCTTGGTTGATGTTTTTCAGTTTGCCATCTCCAATAACTCCACGCAGTGTTTTCACCAGGTTTTCTTGTTAAAAAACAATTACTTATATCTTCATTCTTCAAGTAATCTTTTGCAGGAATTACTGTAACTGATCCATCGATATTGAACT…	0.0890595	Q9LP77	RecName: Full=Probable inactive receptor kinase At1g48480; Flags: Precursor
LYa_b1_contig_1809 (151..1004) consensus	54.0831	0	GTCAGCATTTAGCAATGTAAACCACATTTCTATCCCATTGACTTCCTCTTTGAAGAAACCATTTGTTAATTGTTTATGTATAGTCCTCACATTTTTCCTTGTGAATTAAACTTTTTTTCAAAATATTCAACCCCGGAACCTCCAAACCAGTCTTGCATTTCATTATAACTAACTTGTATGGTTCTTTTTTGCCCTGTTTCTCTTCTAGGTGATACTGGAGCATGAACAATTTCCCTACAAAGTTCAATGACATCTTTCATTTGTGCGATTTTTGAACTTGAGTCAGGATCCATATTTTCAAAAACGCGAAATTGAAGTTTAAATTTATCAATTAAAGTTGATAAGGAAGGAACAGTTTCCAGCCAATTATCAATTGTCCTTTTTTCTGGAATTTCAAAT…	2.031e-07	Q8NHV1	RecName: Full=GTPase IMAP family member 7; AltName: Full=Immunity-associated nucleotide 7 protein; Short=IAN-7
LYa_b1_contig_297204 (1..403) consensus	53.4522	0	ATTTCTTACGTTAAGTTTCTTTTTTGTATGCATTTAAAAAAATCATAATAACAGTACTGCATTTGAAAGAGTTGCCCTTGTCAACTTGGATTTGGTGGTTGCAAATGTTCCATTACAGGCTCCGCTATATTTGCACCATATACATTGCATTTGTCAAACTACAGTACAGCTGTTATTCCTTAATTCAGTGGAAAATAATTTTGATACATTTTTTTTAATATTACAAAATATAAAAATATAAAAGATTAACATTAAAGAACAGCTAAAAAAAGTTGTCATTTTGAGGTTTTGTTTGCGTCTTCTTTCACAGTGCACCAAGGTCTTGTCTTCTTCTTTGATCCCCATAATTGTTCTTCTATCTTCTGGGAACATGTGGGTCCCTGGCATGGTTAGAATTAC…	8.96574	Q7V2L5	RecName: Full=Cytochrome f; Flags: Precursor
LYa_b1_contig_4619 (30..1440) consensus	53.0024	0	TATTAAGTAAGCTTAAAAGAAATCAGTTCATTACAGTAATGAAATGTTTATGTAGGTCAAAGCATGTTAAAAGAACAACATTTTACATATAGTCAAACCTCAATATCAAGGTCATCCTTTCGGAGATTTCTTATATTATTTCCACTGACGGCTAGCGACAAAATTTTAACAGGTGCAACAGTTTTTTTTCGGTTATCTGCTTTGAATACTTCATAAATTTCCACAAAATACATGTCCGACTTTGGGTATTTGTATTACGGAAAATATTAAACCTAAATATAAAAACTTAATATTGCCCTTACTCACGCCGCGTCACAATGGTTTTAGTAGAAGGACATATACCAAGTTTCTTGTCAGAGTAAATTGATTGGTGAACTATTAGTCCCCAATGGTATAAGC…	0.0007699	Q9I928	RecName: Full=Fucolectin-4; Flags: Precursor
LYa_b1_contig_104976 (18..328) consensus	52.6747	0	CCTCCACCGCCACCTAATTCACCACCTACTCCTCCAGTACCGCCTGTATTACCCATTAGAGAATACAGAGCTTGCAGTATAGATACTAAAGAACAAATCAACCACTCCAGTTTACTAAATATGTTCCCCTATAGGTTGCTGTTTTATTCCGTTTATGTTGTGCTTGAATCCTTTCGAAGTAATTCCTCTTAGTCTCCTATCTGTTGTTTAATACCGCCTATTTCTATAAATAAACCATAAGAAGCATGATGCATTAACTTTCTGTGTCATGCTATTTATAACTATCTTCGTCGTTTCCGCTAAGTTATCGC	9.73073	P47252	RecName: Full=Thymidylate kinase; AltName: Full=dTMP kinase
LYa_b1_contig_256982 (1..663) consensus	52.6704	0	GATATTTTCCTATTATCTGGACATTCGTTTTCAATTGCCTTGATAACAATTTTGTCCTCTTTATAATTTGCAATATGTTGAGCTTGTTGGGAAAGCACATCTTCTAATGATTTGAGCTGAATTTCAAGCATACATCTTGCTCGCATGACGTTAATGCTTGATGTTATTGTAATTTTTCCAGTTTTTTCTAGAGTTTTGAACAAAATTGAGAAGTTTTCTGTTCTTGTTTTCCAAAATTCCATGTTGATATTTTCTGCAGAAGATTTAGAAAAGATATTTGCATTATTAAATCTAAAATGATTCTTAAATGGTACCCCAGCTCCACGTAGGACGGACAAGCATTGACTTTCGTCTCCTGAATCGTCATGTGTTAAAGTTGCAAAAATGTTGTCTGTTATA…	0.0247132	Q9T0F4	RecName: Full=Immune-associated nucleotide-binding protein 13; Short=AtIAN13; AltName: Full=AIG1-like protein
LYa_b1_contig_17661 (1..621) consensus	52.3513	0	CAGTGTCATTTTTTCCAAGTCTCAAATCTCGTAGCACATACGTTGTCTCGTTGGACTCCGGATTTAAGTTTTCTTGCAATTCATTACTCATATAATTTGGAATGAGACTTATTGCTGACCAGACGTAGATGAGTAAAATAAGGACTTTTGATTGCGTCATGCGCCGACGCCTCGTTGCAAATGCTTTTGTAGGTGAGCGAATGTGGACAAAGCGGACAATGGCTAGTAATACACAGAGCCATATTGATACTGTATGAGTTGTAGCGGCTAGGTTGATATGAAAGGTCATGTAAGTCATCCAAGATTTACTGTTTTTATCAGGTGTTTTGTTCACATCCGGGTACATACAATAGAAATGCATGGAGAATGGTACATATGACATCATTGTGATTATATCCG…	5.454e-07	Q8SWR3	RecName: Full=Sex peptide receptor
LYa_b1_contig_57585 (327..1208) consensus	52.23	0	GTCGACAATCATACACATCTTCTAATATATTGTAGATAGTCATTAAATATAAGACATGTTATTAGAATATAAATTATTGAAAGTTTTCGGTTTGATACTTTGCTTTAACAAGTCTAAATGTTCAATTACATTATAGAACAGAACTTCCGATTAGATTCCTTTGCTTTCTCTTCCAAAGCCTTTTCTAATTGAGCTATTTGATCTTGCGATATTTTTTTTTTGTTGTAGTAAATAGAAGTATTCATTGGGATAGTAACCGTCCATTTTTAATACTTCTCTAGCGACTTCGTCTGCATATCTCTGCTTTTCATGCAGTGATGATAGATTTTCTACTGCAACAATTCGTCTTCCATATAGTTCATATAATTCTTTAACATCGACTGGGGTATATTTGTCGAT…	1.282e-14	Q9NUV9	RecName: Full=GTPase IMAP family member 4; AltName: Full=Immunity-associated nucleotide 1 protein; Short=IAN-1; Short=hIAN1; AltName: Full=Immunity-associated protein 4
LYa_b1_contig_8629 (69..811) consensus	52.0891	0	CTCCAATTGAACTTGGTTGCTATCCTAGTAAGTTTTGGAATCCCTGAAAACATTATAGAACTACCGTGAAAATCAACATGAACTGTAATGGTATACTATTGTTTGTTTCGTTCATGGCGATTTGCAGTGATGGGTTTATCTTTACCAAAAAGAAGGTTGACTGTTTGGTATCACATTGGGGAATGTGGAGCGATGTTTTCGGATTTGGAGTAAGGACTAAGGAAAGGGTTATTTTAAGGTACCCTGACAATGGTGGACGTGCTTGTCCTGCTGACACAACAATAACACAGAGTACAGGGAAGAAACCGACGATTCAAGAAACAGCTGTTCAAATTGTAACGAATTTTTTGCATAGAGATGTAAAATCAATTCCTTCCTCTCCTCACAGTGTTTCTAGGA…	6.195e-05	Q60847	RecName: Full=Collagen alpha-1(XII) chain; Flags: Precursor
LYa_b1_contig_26833 (50..843) consensus	50.9818	0	CTTCTCTGTCTCAAGCTCTTATAACTATTCTGCATTAAACTTCATCTTCAAAACGTCAACAGACGTTGCTCTCACATATGTAGCGATAACTGTTACTTGAACATATTTGATCGAAAGGTTGTGGTCTACCATAAGAACAGTCAGTTATATCGTCGTCCTCTCGAGCCATAACCTGGATACCAATCTAGAGATACAGCTTTACTCTGGTCGTGTGTCCAGAGAAACTCTCCTTCTGTTTTCGTGTCTGTCAAACCAATCCAGTAACTAATGCCAATGTTTATATTTGAAAGAATAAGAGTCTTTTCCCCATTGCTGTCTAGTTTGATAAGGTAGCCACCAAATTGTTTACAGTAGTCCTGTGCTTTCCACCAGTTTGTTTTGCCAGTACTAAAATAGTAA…	8.018e-11	P86854	RecName: Full=Perlucin-like protein; Flags: Precursor
LYa_b1_contig_150508 (679..1710) consensus	49.8573	0	ACGACAGATGAAAAGTCTGAAGCAACATCGCACAATAGCAGCTGTACAGAAACTTTAGTCGAATCGCACGAAACAACTACAGATGAAAAATCAGAAGCTATATCGCAGAACCCCAGCTATACAGAAATTTTAAACAAACAGCATGAACCAACTACAGATGACAAAAGAGAAAAGACAGCAAGCATGGATAGTGTAGATCAACCACACCAATTAAGAACTGACTATCTCACAGAATCTAACCAATCGAAAGCGGCTCCAATGAAATGTTTGAATAAACCCAGTGTACGAGCTGTCATTGCACTAGATATTGGTACAACGCATTCCCGTTATGCTGTTTTAATACCAGAAACGCCATTCATTGAAGAGAAAATTGAATTTGTATTTAAAGATTCGGTGCCT…	2.38e-16	Q96MM6	RecName: Full=Heat shock 70 kDa protein 12B
LYa_b1_contig_349863 (1..208) consensus	47.9884	0	TGTAGTGAGTTAGAAGATGTAGATGTAGATGAAGATGGATCGGAAAACGCTCCTATAGAAAAGTGTGGATTGTCCAAAGACACAGACAGGTTTTTTACTGGGATAACAGCTCCTATAGATGTAGGTTATGTGTTGAATATGCTTCGGAATCAAGGTGTATACATCAGCATCAGTGCAATGTTTTGTAGTGAGTTAGAAGATGTAGATG	0.752324	Q8FGJ7	RecName: Full=Probable diguanylate cyclase DgcQ; Short=DGC; AltName: Full=Cellulose synthesis regulatory protein
LYa_b1_contig_28685 (571..1515) consensus	45.9794	0	CTTTGCACCAGTCAATGCTTTCATGAATAATGGTGTAATTTCGTTCTCCAATGTAACATGTCAAATTAATTTTTCCGTTGCAGTTAAAATACTCCAAGTCCACTGCTTGTTTAATAACTACATTAAGCAAACCTAGCTTTCTGATAGTTGTTGGTCTTGTTGTTATATTCAACGGAATAACGATTCCCTCATATATAATTTCACATGTTGGCAATGGAAACACGTTCATTTCTATTGCAACATGATACTTCCCATGTGTTTTCAAATGATCAAGATAATAAATATCTGGAGGATAAATATAGTCCACGCCTTCTAAGTCCAAAATTGATGTGTATTGTTGTAATCCACAAGCACATGTATATTTACAAAATAAGTCTTCAACTGTTACTTGTTTAATCA…	1.12139	P49000	RecName: Full=Muellerian-inhibiting factor; AltName: Full=Anti-Muellerian hormone; Short=AMH; AltName: Full=Muellerian-inhibiting substance; Short=MIS; Flags: Precursor
LYa_b1_contig_159 (679..1589) consensus	45.0702	0	CTCAGATGATTATAGCCTTGGGATAAAAAAACACTAGGATAAATATCATACTCTTTTAATAGTATTATCTTCTATGAAAATTCATGCAAACTTGGGTCGATGGGGCCCTGTCGAAGATAACATATCGTACATAATTTATGTTTTACTTTCTTTAAATGAATAAATACACAAAATAATTATTCTGAATCATTTAAGTTTCAACATGTTAATATAAAGTTTCCTTTTAAGATGGATAATGCTATATTACCAAACATGCTAAATTAGCAAAGTCCATTCTGTCATAACAATCAAACGACTTCAAACTATGACAATGAGTTTTATATCCGTTTTTTATTAAACTAGATATTAAATTCATATGTAAAAACAGACTAACTCAGTAAAGGTTAATTAGTCTAAATC…	0	not available	not available
LYa_b1_contig_139279 (23..895) consensus	45.0081	0	TCCGTATTTTCACTACTGCTTACTTTCTCTTCCTCGCCTGTCTATTACAAATGGATGCCACGACAAAACTGCTCCTGTGGATATTGTGACAAAGCACCGTCAATGGTTATCTTCCAGTATAGTGGTGACGATTTATAAAGGATAATTCAGTGGATTTAAAAAAAAGAATGGGAAACAAAAAAAGTACACAGATGACACAGACGGATGATGTCGATGTAAGAAGTCCAGCACAGATAAATGTGGTTGAGGATAATTTTGGTGAACAAGAAATTGAGATTAGAATGATGACCATGCAAGCTCTAAAGTTAGTCAAATTATGCAGAAATGAATATGAATCAGCTGATATACTTGTAAGCGATGATAATATGAAGTGTCCACTAAAATTCATGGAAAGTATGA…	0.913705	A6LA57	RecName: Full=4-hydroxy-tetrahydrodipicolinate synthase; Short=HTPA synthase
LYa_b1_contig_176771 (1..657) consensus	44.6954	0	ACATACTTCTAATAATGACGAACATATTAAATATCTATACATTTGAGCGTTCCTCTGTTTCTTGTGCTTTCGTACTTGTATTATGTTTTGAAGAGGAATCCTGGACAGTTTCAATATCTTCCAAAGCGAATCGGAAATCGGACATTGATTGAATATCCTTCATCCCCAATTGTTCTCTGATTGTTTGGTAGAAAGTTGTCGGACACTCATGAACAAGGAGCTTAAGAAATGCAACGTCTTTTCCTCTCAGTTTTTGTAGCTGTTTTTGTTGGGAGAGAAACATATCCTTTTGAATAATCTTATCTTTCAGCCATTTCTCTACTTGGGAAAGTGTCCAATTCATCGCGCTGTGAAAAATTTGACTCGTCAGTGGGTCCTTCTTTGTTTTTTCTTTTTCAT…	0	not available	not available
LYa_b1_contig_38307 (101..1089) consensus	44.6698	0	GTGCAGAATATTTTGACTACATGGAATATTTAGAAGAGTAAACAACCTTTTTAATCAGAATAATAATTATGTCTTATGACAGCAGTCTGAACAATTACAGTCTATATCTATAACACTGTGAATGTTTATATTGAACGCTTTCAACTATTTATATTTAGAAAATTTGCTAATGATATAATTATTTGAGCGAAACATAGGTCAGCAAGAAATGTAGAAGTTCGGTAAACTTTTCTTCTTTTGAATATTGCTTTTTTTCTTAACATTCTCCCATAATGATGCTTTTCATTACACTATTACCATAAACAAATCACGCCCTTAATTTGACAGAACTAAAACTTGTCCATTCACCAGTAAGAAATTCCATCATTTTGATCTTTGTGAAAGAAATTGAATTGACAA…	8.14785	N4WHA7	RecName: Full=Reducing polyketide synthase PKS2; AltName: Full=T-toxin biosynthesis protein PKS2
LYa_b1_contig_41681 (1..2192) consensus	42.9738	0	ATTCTATAAGATCATTGTCTGTAATGTCGTCCAAAGGGAATTCCATGTGAACCTCCGACCATTTTTTGAAACATAGTGAATCGCCAGTTTCTTTATTCACTATTGTCATATAATCTTGTGACAAAGACACAAATTCACATTCTTGGTAAATCAATATAGATCCCCAATTATGACCACATAAGAAACCAAAAACTTTGTCTGTTTTCTTAATCTCATCGAATGTCTGAGATTTTTTTGTCTTTCTTCTGTCAATCTTGTCAAAAATCTCTTTATCGCAAATAATACAATGTGCCTTTCTAATCCTCCTAATGTATTGTCCGTCTACGACAAATTTGCCACATAATGCACAGGTTATGTAAAATTTGCCTTTCTTTTCTGAATTATGATTAGTTTTCAGGC…	2.869e-66	Q9BYX4	RecName: Full=Interferon-induced helicase C domain-containing protein 1; AltName: Full=Clinically amyopathic dermatomyositis autoantigen 140 kDa; Short=CADM-140 autoantigen; AltName: Full=Helicase with 2 CARD domains; Short=Helicard; AltName: Full=Interferon-induced with helicase C domain protein 1; AltName: Full=Melanoma differentiation-associated protein 5; Short=MDA-5; AltName: Full=Murabutide…
LYa_b1_contig_164295 (104..1184) consensus	42.8329	0	GTTCGTTTTTATTCACATAATAAATTCAATAATCATGGTTGTACATATAAAATAACAGGTATTTTCAGTTTTATAACTGTTTATACAGTAGGAAAGCTCGCCTGCGTTGCAATTCCACATGTGTTGTTATTGTTTCTCACCATATTGAAATATCCTTCCATCCCCCATGATGTTCCCCAGCTGTTTTTAATAATCCAGTAGTTATCTGCCCCACTTCCTCCATATCCAACGGTAAGTACTGCGTGATCTAATACCGTTGAACTGCAATATTTATAGTTGTATATTCCACTTTTGTAATGTTGAAATGGCGGTCCAGATGCATCAATTGCCACTGATATTGGTCCAACTGAAGCAACAGCCATTTGCACTTCTTCCTCGCTTTGTGCTGTTAGATCGACA…	6.722e-105	P25975	RecName: Full=Cathepsin L1; AltName: Full=Cathepsin L; Contains: RecName: Full=Cathepsin L1 heavy chain; Contains: RecName: Full=Cathepsin L1 light chain; Flags: Precursor
LYa_b1_contig_296768 (10..336) consensus	42.5029	0	TGCAAAATTAACACTTTCATTTTAAAAGTAAAACAATCATTTAAGTCGTATTTCCTCAGAACCACCCTCCTCCCTTTCCTCCTCTTCCGCCTTGGCCTCCTCGGCCTGATTCGCCTGGTTCCCCATCCTGACCTCTCATATTACAATTGTGTCCTCCATTCCGCTGGTGGCTATGAGTTTGCAATTTCCAAAAGCACCATGCTATCTGTTCACCTGGTATATACCAGTCTTTTATATTTTCCTTTTGGATGTAATCTCTTGCAGAAAAAACCTTTATCACTGGCCCATTCGACTGTAGTTCCTCCAGAATTTTGAATGCTTTTCTGA	0	not available	not available
LYa_b1_contig_11821 (85..541) consensus	42.2914	0	CCCTGATCAAGATTAGTTTGAAATATAAATAACTTATCCGAGTTTACGTCTATAAACAATAATTTTTGTTAAAACCCTAATTGTTGTTTAATTCCCGTATAACAGAGATTAACATATGCATTCGTCATTAAAGAATAGAACAGAAACTTCGATCTGATTCTTTCGCTTTCTCTTCCAAAGCTTTTTCTAATTCTTCTATTTGATCTCTCTGTAAGTTTCTTTCTTCTAGTAATTTGAAGTATTCATGTGGATAATAACCATCCATACTTGATATTTTATCAGCGACTTCTTGTGCATAGGTTTGTTTCTCACGCGTCGATGCTAAATTTTCTACTGCAATAATGCGTCTTCCACATTCGAGATATAATGCTTTAACATCGTCTGCAGCCTGTTTGTCAA…	1.75874	Q8BWF2	RecName: Full=GTPase IMAP family member 5; AltName: Full=Immunity-associated nucleotide 4-like 1 protein; AltName: Full=Immunity-associated protein 3
LYa_b1_contig_21922 (1..625) consensus	42.1273	0	ATATAAATGCAATTGAATATTTATCCGCAAAGTCCTTCAAAGCATTGTAACAGCCCTTTGAATGTTGTCCACTTGGGGCAGAACCCTTAGTAAATGAGCATGTACTGGTGTATGAAGACGATGTCGCTGATGGACAACATGATTTGGGAAGTTCGTCAGCTCCAGCTCCTGTATACCATGCAGAGCCTGTGTAATCATTATTGGCCGCTCCTGTACCAGCGACAGCATCAATACCACAACACTCAAAGTTCATATTCAGGTAATTCCATCCGGTTGAGACTTCGTTAGTAGTAAGATCGTCGGTCGTAAATTCCAGAAGTCCTTCTTTCATTTTCTCTTTCAACTTATTTTCTACGTCAGCTTTGAATACAATCCACAGTATGACAATTACCAACTTTC…	3.15259	P13044	RecName: Full=Protein GvpE 1
LYa_b1_contig_5846 (30..3895) consensus	41.7444	0	CCACACCAAAAAATCTGACAAATCCTAAATGTTGTACACATTTGACACATTTTAGCAGTTGCCGTGTCTATTTCTGTGCATACACTTTATCCATTAGAATTTCGTTTGTAAGATTCCACACTTCAACAGCCTGTGAAGAAATGATATCTTTTGGGAACATTTCATATACTATTTTAGTGAGAATATCTTCTTTCTGTGGATCCTCCTCGAACAAAGATGCACCAATGTACCCAATAATGGAGTCTTTCATACTCATGGCAGATATGTCCACATAATCATCACCTGTGCCCATTGGTACGTCTAACATCAAGATGATTAATTCAAAAAGTACTTCAAGTAATAAGCTCGTTTGTTCAATCTGAAAACCATTCAGAGCTTCTGTGACAGCATTCGTCTGAT…	5.633e-134	A0A0R4IBK5	RecName: Full=E3 ubiquitin-protein ligase rnf213-alpha; AltName: Full=Mysterin-A; AltName: Full=Mysterin-alpha; AltName: Full=RING finger protein 213-A; AltName: Full=RING finger protein 213-alpha; AltName: Full=RING-type E3 ubiquitin transferase rnf213-alpha
LYa_b1_contig_31333 (63..1126) consensus	41.2536	0	GTACTTGCTGTTGGGTTTTTTCTTAACATAGAACTTATGACATGCAAATAGTTAGGTATGGTCAAATTTGTGACATATATCCTGTTAATATGGATTTTTCCTTCATCATTGTACATCAATAGTGTTCCTTGTTTGACATGGAAAATCAGTCGAGAAAAACTGACGTTCACCTGCAGAATAGCTGGATTTTACAATTCTGTTTCTTTGATGGATAGTCACGGACAACTGTATGGGGAGTGCACATTTTCAAGAAATTTGCATCATTGCAATCCTACCGACAGAAAAGATTTAATAGATGTTCAATATTCAAGAAAAAGTATTGTATTTACTATCGTAAATTTTGACGATTCCGTTAATGGTATTTGGGCTTGTTTGCAAGCTAATCTGAGACTTACAACA…	0.145613	A6SW70	RecName: Full=Lipoprotein signal peptidase; AltName: Full=Prolipoprotein signal peptidase; AltName: Full=Signal peptidase II; Short=SPase II
LYa_b1_contig_83693 (1..584) consensus	40.7307	0	AAAGCTCACATCATTCCTACACACACCATACAAAGTATTTCCACACTCATTTATTCGTTTTCAGTTAAATGTAATGAAAATTACACAAAAATAATTCGCTGATTATTCAAAAAAGGCTTTACAGAGTAATAGCTATGCTGTTCTGAGTTTCGTTGTTTCAAAGATTCTACAGCTAAAAAAAAATTATAGCCAAAAAACTAAATTAAATTAAATTAAAAGAAATGAGACTATTGCTTAATACTTGGGATTTTTACATTTTCTCTAAAGAACAGATTCAGCCACAAAATTCCCTCTCACTCCTCAACACACCACATATCTCGGAATTGTTTTATGCATTCAATAAATATAAAATGGCATATTTAATGAAATGATTGAGAGTGACCATCAATATCTTCTCCG…	0.777685	Q4R4I5	RecName: Full=Lysosomal-associated transmembrane protein 4A
LYa_b1_contig_98792 (85..1429) consensus	39.5854	0	GGAAATTTGAAAGCTTGTTGGTAGACGATAAACCCTGTATTTTAATAATTGATCATTCAAACCTCTATCGAAAGGCAGCATATCATTATCATTGTTTTGTGGAATCTATATTTCATGTGTTTATTACTATTTAATAACTCGTTATGAATGTATGAAATAGTATTATACGAGGAAGCTACACATAACCACTTGACACAAAAAGGCAATCGTACATATAAACACGCTCACGTGAACCGCACACACATTGAATACGATACAAACCAAAGTAGCATATGGTACCATATGATTTACGCAAGAAGTACTTAGCATAAATGTACGTCATACATATACGCAATAGACGGTACCAAAACCATGTTGGAAATGTTCAGCGCTGAATAATTAATGACATAATTTAGCCTA…	0.0517813	Q5HN75	RecName: Full=Glutamyl endopeptidase; AltName: Full=Glutamic acid-specific protease; Short=GluSE; Flags: Precursor
LYa_b1_contig_350088 (193..761) consensus	39.5107	0	GGATAACTTAACTCAACTTGAATTTCCATTTTGTGTAATGTTATGACATTATAATTATAAAAATAAGTGTAGAAAAATTGTGAAAGCCAAAATTAGTCTGAATATCCCTATGACAGATTGGATCCTCCTTATTAAAACGTGTGGTCATGTTTTGTGTGTATTTTTTAAAGAATCAAAAACACTTTTGACAGAATTTAATTTTTGTCCTCACTAATTGTTTTTAACTTATTCCTTCATTTCATGTCCTTCATATCTATTCAGAGGTTTATATTCCAATAATTGATTGTTAATGTTTACTATGTTCTGTTTTCCATTCTTTCATTTATTATGAAGGCTATTTTGCTGCTCCTAAATCATGAAATTCTTCAGTTGATTCAATTTCACAGTAATTAGATGTTT…	1.90999	Q9Y4D2	RecName: Full=Sn1-specific diacylglycerol lipase alpha; Short=DGL-alpha; AltName: Full=Neural stem cell-derived dendrite regulator
LYa_b1_contig_98324 (1..476) consensus	39.0434	0	GAAATGTGCAATGCAGTATTAGGCAATCGGAAATTAAACAAAGATTGTTCAATTCCTGATACGAATTCTTGCAGGCATCATTCACGATTAGAAAACTTAAATCGATACGGGACGCAAATTACCATTGTAGATACACCAGGAATCAGAGACATGACAGATATATCAGCGACAAGTAAAAGTGTAAAAACAGAGCTACAGTTGTGTCCACAACATGTTGTAGTTTTCTACACAGTATATGAAACAATGACAGAAATTGACAAAATGTGTGTGGAACAAATAAGGCGGAACTTGGATTGTATTTCACGCAGAAAAATGTTTCTTGTGTTGACTAACTTTATTGACACCAACGATGGAGACAACATCAGATACACTAAATCAAAAGTGCCCATTCTTCGGATA…	0.009899	O81283	RecName: Full=Translocase of chloroplast 159, chloroplastic; Short=AtToc159; AltName: Full=159 kDa chloroplast outer envelope protein; AltName: Full=Plastid protein import 2; AltName: Full=Translocase of chloroplast 160, chloroplastic; Short=AtToc160; AltName: Full=Translocase of chloroplast 86, chloroplastic; Short=AtToc86
LYa_b1_contig_293697 (188..2422) consensus	39.0242	0	ATTGTTGAACTTTTGGAGGAAACATTCCCAACTTCTTCAATTTTAAACCAATATTGGTAGTGAATGACGATAGAACTAAACACGTATGCTGTAACCCTGACAAATTTCTAGAAAAACTTTAAAATTGGGGTTTTAAAATTCAATTATTAGCTAGTATCTACTAATGCGTTATAGAAATACACTAATCTATGATTACAAAGTTTGGGAAATGAATATTTCGGAATAAACTTCATTGTGAACGCACAAAACGTGCATGCAGCTACACAGGACGGAATTAAAACATGTAATACTTTTTAATTTAAGACTTATTATAACAAATTTTAAAACATGATACTATATTCTCTTCGTTATATTCCTATTGGTTTTTTTTTCTTCTTAAACGGACATCATTTTCAAATC…	0.565856	B9M1G7	RecName: Full=Deoxyuridine 5'-triphosphate nucleotidohydrolase; Short=dUTPase; AltName: Full=dUTP pyrophosphatase
LYa_b1_contig_75339 (1..1632) consensus	38.6177	0	AATCTCTGGTTAAAACCTGAAGTGGAGATCCTCCAACTTCAAGTATAATCCGTGGTGTAGTTTCTGATGATATATCGAAATATCCTGTATATGATGTTATTGGACCAAACTCATTCGATAATTTGATCAATTCAGGCACGCCATCGCTAGAGTGTCCTATATCGGTTCGTTTTGTCGCTTCAAAACTACATTTTGATGATGAATTCTTTTCAGCTGTTTGATCGCTAAAGCGAAATCCCCCAACCAACACTTTGTACAATCCAACAGGAGTGTCTATTCGCCAATGGATTGAAGAGAACGATATCAGAACAAGTATTATTGGTTTAATTACAGGACCACGTGGTTTAATGGAAACATCATAGACCCCTTCGCTTCCAAAAATGTTGATAACATGTAACT…	0.001155	Q8CGM1	RecName: Full=Adhesion G protein-coupled receptor B2; AltName: Full=Brain-specific angiogenesis inhibitor 2; Flags: Precursor
LYa_b1_contig_45947 (2..650) consensus	38.3651	0	GTGCCTCTCCTACAGGTGTTGCTGAGGCCGGGTTTTGTCCAGTGATGAGGCGACCGTCAACCTGGACATTTGCTTTCCACATGTCAACTGCAACAAAACTTCCACCAAGCTCTTTTAGTTTAGTTTCTAACGGAAATGGCATGACAGACGTCAGTTTTACGCCGTCTTCTTCTTCATTCGTGAATGCTGTTACTTTCTTGCCTTTTATTAAATGTTCACCGTTGGAGAGTTTCAATGGAACTAATCCTACTGGTCCGTGACATACGGCACTGACAATTCCTCCGTTTTCATAAATACCAACACCTATTTTTGCAATCTCCTGGTTTTCTGGTAGATCAAACATAGGACCATGTCCCCCAGCATAAAATATTGCTTTAAAATCACTTGCTTTAATTTCTG…	4.87e-31	Q5AF03	RecName: Full=Glyoxalase 3; AltName: Full=Glutathione-independent glyoxalase
LYa_b1_contig_47360 (1..352) consensus	37.0004	0	TTTCAAGATAACTTAATCAATGTATTAAATTTTCTGTTCGGTGATAAAAATTGCTAAAAAACATTTCTTTTAACGCAAACTGAAACGAAAAGCGTTGACCAAAATGGCCATACCTATCGTACTATAGTCTATACTTGTATGTTGAAGGAATATATCCATTCAACCCCTTCCTTGTCCAAAATATACTCATATGTCCTAGCAATACCTCTTAAACTCAAAAAGCCTTGACCATTCTAATGTATTTGACAAACACATTTGCTTCCTCTTGCTGCATAATGTATGTGATAAAGACATCAATAAGTTATGTGTTGGTTTATCTCTTGATTATAACATCTTAAGAGGAGTTTGTACT	1.47088	Q8C4A5	RecName: Full=Putative Polycomb group protein ASXL3; AltName: Full=Additional sex combs-like protein 3
LYa_b1_contig_8003 (517..1131) consensus	36.7727	0	CTACTATTCACCCATTTAAAAGAATTTCTAAAATCATGCTTGCTTCATGTTCTTTTTGTCGTTAAATGTCCATTTCAGTTGCAACTACGTCTTTTATCAACTTTCCTAAGCTTGCATCGACCAGTTTCGAAACTTGTTCTGAACACGTTTCACCTCTCACACAGTAAATAGCAAAATGTTTGCAACTATTGGTAAATATATTATACTCTCCCCATTTGTGGTTGTTTTTGTTGTTATGAACAAGTTCAACCGCCCTTTTAGCTGACTCTGAACCAACCAAACGATTTTTATGGTTTACCCTAAATAAAGATGTTTGATTATTCATGAAAAATGTCAAATCTTTAGATGTTATTTTTGCATCTGATATAGATCGGCCACTAAAATCCACAACCGTATATG…	0.260836	O95237	RecName: Full=Lecithin retinol acyltransferase; AltName: Full=Phosphatidylcholine--retinol O-acyltransferase
LYa_b1_contig_110528 (58..614) consensus	36.2302	0	CTTATTGAAAGCTAAATTAAATGTATCTACTATGAGATGATTATCAACACATGCAAGAATTAATTCGTGTAAACTTGTTACGATTTTCTATGGTTTTCCACATCTTATATGAATCATTTACTTTCTTTAAATTGTTTATGTAAAACAAATGACACGGAGTTTCGTTGACACTTTGATGCACATCATGTATATAACACATCGGCTTTACTATTTCTATGTTCAAAAACCAAGGAATAAATCCACTTCCATACACATCTTCAAGCCACAAAAACGGTACACTACTTGTCGCTTTATACATTAGTCGAATTACATTTATAGACATAATGGAAGAAGGTCCTGAACAATACGGCGGAAATGTTTGATACGGATAGTCAGAAAGAGACGTATACCACTTGTTTT…	1.069e-11	A8MXE2	PUTATIVE PSEUDOGENE: RecName: Full=Putative UDP-GlcNAc:betaGal beta-1,3-N-acetylglucosaminyltransferase LOC100288842; AltName: Full=Putative UDP-GlcNAc:betaGal beta-1,3-N-acetylglucosaminyltransferase LOC402377; AltName: Full=UDP-GlcNAc:betaGal beta-1,3-N-acetylglucosaminyltransferase 5 pseudogene
LYa_b1_contig_16049 (12..332) consensus	34.7257	0	CGGTGAAATATATCGTTATATTAAAGAAAGAGAGAAATCAAAGGCAGAAAGTGTGCAGGATATTGAAATGAATTCATCTGCAATTCCAAGAAGAAAAGAATTAGTACAGGGGTTCAATACACAGTTAGATTACTCAGAATGTATGATTGATCTACAAAGGAAATTGATGAAACTGCAACAAACCAACATTATAGATACATTTAGTTCACTTTCTACGGAGAAAAGAGAAGAGATGGGTAAAAATATTCAACATCAAAATACTAATTTAAAACAACAGGAGAAAGTTATTAACATTCTTTGCATGAAAGGTGATACATGTAC	1.22402	Q98TY9	RecName: Full=RAC-alpha serine/threonine-protein kinase; AltName: Full=Protein kinase Akt-1; Short=xAkt; AltName: Full=Protein kinase B, alpha; Short=PKB alpha; AltName: Full=RAC-PK-alpha
LYa_b1_contig_95322 (1..1877) consensus	34.0024	0	GTTGCTGTGTAGGGGACACATTGTTAAATGAACTTATTAATGTTACGTGCAACAACTGTTACACTATGAACTGAGGTATTTATCCGGCTATCTTGAACACAAAAGTCATCTACATGTTTGAATATTGTAAACCAATTAGTTTATACGAAGGCATTATATGGATGCGAATTGTGGAACAATCTTACCAAATCTGAATTATTATTGCTTGAACGAGCTCACAAAATCGTATATAAAGCAGTACAAAGCTTACTTAAAAAGGTCCAGAATAGACAAGTGTACCAGCCTTCTTCAGGGAGAGGACAAAGAGTTTGCATCAGGCAAATTACCTGTGTTTCCGGATTTAGAAATTGGTGACATGGTATTTCTACGATGTGACCTCAATAAAAGTAAGTCACGCGG…	0	not available	not available
LYa_b1_contig_12811 (1..355) consensus	33.7909	0	ACTGCTGAATGTCTAGTATCACAAACGATGAAATCACATTGCTGTCCAAAGCATTATATGCTCCTGTGGCAGAGCCTGGGTTAATGTAGAATTTATTTTCATGTTCAAATGCCTCAAACTTGTGTGTATGTCCAGAAATGAGAATGTCCACATCTAACTGTCGCTGAACCATTGCTAAACTTTCTGTGTCGCCCCACGGTACTACCTGGTGGCCATGACATAAACCAATTCTAAACTGTCCAACTGTTACAACTTTCTGCTCTGGATAATTCAGGTTCTCATCAAAGTCTCCCCTGACCACATGGACATCGCTGGCCAATGTTTTCAGGTAGTCAAATGATTCCTTTGTACATAG	8.855e-75	Q5R9Z1	RecName: Full=Vacuolar protein sorting-associated protein 29; AltName: Full=Vesicle protein sorting 29
LYa_b1_contig_99441 (32..574) consensus	33.7657	0	CTGTACATGTAAACGAGGACTTTTATAATTAGTATTATTTCCCCTTTTCAACATTATTTTAGGACAAACCGTGTCTCTTGTTTCCTTCTCTTTTGTAATACACTGATAATCTGCTGACAAAAGGAAATCCTTGTCACAATGGACACGATAACAAGAACAGTCTTCCTCAGATGGGTTACAGAAACATCCACCTGTTTGTTTTGGTTTTATTATGAACCTATACCCTCTTGTGTAGTCACAACGACATGTTCGATCATTGATTGTCGTCCCAGCATCGTATGCTATCTGTCCCTCCTCTGAACAGACTGACTTATCATACACACACACGTTGTGGCCAGTTGTGTTAAATGGAAAGGGCTGATATCTTTTTGATGAACATGGTTCTGAATCAAATCCCGG…	2.2777	P49758	RecName: Full=Regulator of G-protein signaling 6; Short=RGS6; AltName: Full=S914
LYa_b1_contig_660 (128..797) consensus	33.1004	0	AGAAAAAAGGTTTATAATGTTAGCAGGAAATCTTATGACGACTTGTTATGGGTCCAAATAACACTTGTAATGAGACAAGCGACTGGCAAAAAATGTACAGTCATACCTGAGGCACCGCTACCGGTACTGGTTTCAGCAGCTTCCAACGCGGTTGTGTTGGTCATTTCTTCTGTTGTCATCTCTTCTGTTGTCATTTCTTCTGTTGTAGGAACAATTACCGTTGTGGGAGTTGATTTTGTTGATTTATGAGCTTTATTACTATCAAATTGTACAACACACCTATATGCCTTGCCATCTCTACCTTGAATTGAATTAAATGACATGGTTGTGACATTGTCAGAATTGGTGGGGTTCGTTAGATTTACACGATTAACGAGATACTGCCCAGCATGGTTTAAA…	2.3786	P51826	RecName: Full=AF4/FMR2 family member 3; AltName: Full=Lymphoid nuclear protein related to AF4; Short=Protein LAF-4
LYa_b1_contig_56635 (1..2824) consensus	32.625	0	TATTGGTATTTTATCTGATAAAGTCATGTTGTTTACAATTCTGAATGTTTAGTATTCGTAATGCCTTCTTATATAACATACTACTATAGGGAACAATGTGACAACGATTGACTTAGGTAGTGTCAAGTTTTGATCTAAGTATGAGCCGTGTGTATATCAAATCCAAAATAAATCGTTTCACGGTGCGCCTGACAGATGTGGAAAGCGTACATATTATATAGTAGGTAACATGTCACATAATTATACTATCGTTATCGGTATCATGTTCGATCCGGAATTGGTTAACTATAGGTTAAATTAATTATGTTGAACACAAAATGGCCTGGAATGGTATATTTTTTTATCCACATCATTTGTCCTATATCGGCTATATTTAACGTTGATTTGGTTATTCGCAGT…	0.011438	Q05793	RecName: Full=Basement membrane-specific heparan sulfate proteoglycan core protein; Short=HSPG; Contains: RecName: Full=Endorepellin; Contains: RecName: Full=LG3 peptide; Flags: Precursor
LYa_b1_contig_52383 (1..812) consensus	32.2974	0	ATTGTGTGTCTTTCTATGTTGTGATGTTAAACTATTGTTTCAGAAAAGGGAGAAGGTTTAGTACCTTTAAAACGTATAATCCCGCTTCAAATGTTTGCACCTGTTCTAAGTCAGGAATCTGATGTACAGCAGTTGTCGTCTGTTAATGTAGTTCAAACGTGTTTCTCGTTTCTCGTTTTAATATAGATGAGACAGTTGGTTTTCATGTTGAATGCCTTTACACTAGTATTTCTTTGGGGGCCCTTCAAAGCTTTCTGTTTGGTGTGAAGGCCGTACCTTGACCGATATTGGTTTAGTTTTATGAATTGTTACTTGACACTCATACCCCATCTTCCTATATCTATATACATTAAATTTTATTGATTAACACTGTAAATATATCGTTGTTTGTGTGTGCTC…	0	not available	not available
LYa_b1_contig_48881 (1..327) consensus	32.0925	0	ATGTCATTATCAAATTACATCAAATTTGCTGTTGAAATTTACAACAACAAGAAAACATCAATATCTATGTGTTACAATTGATTAAAAATATTAAAAGCGATTATTGATATTTGATATTACTTAAGTTATGGATTCTGTTTAACATATGGAGCTAAAATAACACAAAATTTAAACAAAACTATCTAAACTAGACACAGACAATTCAAGGAATTTTGCATTGTATAAACGGTGTGTTCCCTTGAGTCATCAAATTTACTCATTTTTTTATCCTCCACCAGTTAGTTTATACTCTTCTGTGCTTTTCCCCGCCTCTTTCTGTTGGCCCTT	0	not available	not available
LYa_b1_contig_405556 (1..1947) consensus	31.9278	0	CAATGAGGTTTCTGTGAAAATACCTCCTGATCTGATAGGACATTTTGATCTGGTACTTCTGTTGCTTTATATATACCGTAAATATGGGCCTTTATTGATTGGATCAATACATTTACGTTTTTGTCCAGTAAATGTGGAGTACTTAAATCAAAAGAGGTCGTGAAGGTAGTAATCCAATCTAACCAACCATCAGCCTTGTAATCTTCTTCAATGTTTAATAGCATAATAGTTTTTCCAAGTTGCAATGCATATTCTGCCTCTATTCTACTACTAAGGCTGTTCTTGTATTTAGATGAATAGCATACTAGTACAATATTTGCTTTCCTAACAGATTCAATCATACCCTCTACTGTATTAGATTCACTAGTGTCTTCCAATATCTTGATAACACGGTTCTCT…	0.275138	C4K4R2	RecName: Full=4-hydroxy-3-methylbut-2-enyl diphosphate reductase; Short=HMBPP reductase
LYa_b1_contig_202635 (16..1220) consensus	31.8051	0	CTCCTTCACAGGCTGCATGTAATGGAGACTCGCCATCATTGTTACAAAGAGAGACATCGGCTTTGTACTGCAGTAACAGTTCGACAACACTTATATCGTGATTTTGACAGGCCACAAACAACGGAGATTCTCCATTATTGTTACACCGAGATATATCAGCGTTGTGCTGGAGTAACAATTCTACTAACTCCGTGTATCCCCATTCACATGCTGCATACAATAGAGTCATCCCATCATTGTAACTTTGAGAGACATTGGCACCGGACTGCAGTAACAATTTGATAATTTCTATATTGCCTTCTTGACAAGCCATACACAGTGGAGAATATCCTTTGTTGTCATTCTGATTGGGATCAGCACTGTGCTGTAGTAAGAGTTTTACAATTTCTATATTTTCAT…	1.845e-56	Q8C8R3	RecName: Full=Ankyrin-2; Short=ANK-2; AltName: Full=Ankyrin-B; AltName: Full=Brain ankyrin
LYa_b1_contig_51545 (83..2511) consensus	31.5023	0	GTCTCAGCTACCATCGTTTTAATTGAGTCTTTTGTTGGACATTCTTTTTCAATCTTTTTTGCCATTTCTCTCATCGCAGACGATACTTCATGTGGATTTGTTTTGTGTACATCAATAGCAGAATCTACCATGTTGAAAATATCTAGTGGAAGAAACACAATGTTAGCAACCCCTTCAACTGCATAAAATGCTCGCCCAACAGTTCTAAATTTCCTAAATACCCCAGTTCCCACTCTCGCACCAGTAATAGCAGCATCATCAAAGGCGGTTGCAAGTTGAAACGATGATTTGATGGTTGTATAAATAATACTCCCACGTGTACCCCAGCCTACCTGGCCAGCTCCTTTAACCAGATTCCACCAAAATTTTATCCAATGGGGGAAAACTTCTTCGATGCGT…	0.300289	Q5BDY8	RecName: Full=Nonribosomal peptide synthase nlsA; AltName: Full=Nidulanin A synthase
LYa_b1_contig_296651 (634..1987) consensus	30.8294	0	ATAATTTATATATCGATAAGCTAAGCTATTTTTTTTCACTGTAACACTATTTTAAAAATAACTGTATAGCCATGTTGTTTTGTCAAGTATTCGAAACATCTAGGTAAACATATCATGTATTAGCTGATCAAAATAAGATAAGTAACCTCTTAAACCTAAACAGATTCGTTTTGTCATTTCTACAATAATTTACTAAACCTTGTCAAAAGTTAAAGTGAATTCGCTTTCGTCAATACCATCAATAAATGTTAAATTGTTTCCTAGAAAAGGTTTATCATCCGGTTGAGCGTTCGATTTGCAAATGATTATCTTCAATGTATCATCTGAAAAATCGAGCGGTATTACATCAAATGGCGTTGCACGATGTTTCTCTGAAACACATCCCGCTATATGCTTGTC…	1.78619	A7FX30	RecName: Full=Glycerol kinase; AltName: Full=ATP:glycerol 3-phosphotransferase; AltName: Full=Glycerokinase; Short=GK >gi|166232288|sp|A5I5M0.1|GLPK_CLOBH RecName: Full=Glycerol kinase; AltName: Full=ATP:glycerol 3-phosphotransferase; AltName: Full=Glycerokinase; Short=GK
LYa_b1_contig_352200 (19..270) consensus	30.656	0	CTCCTCCATCTCTTCCTCCTCTGCCTCCACTCCCACCACCGCCGTCTACTCCACCAGTACCACCAGTATTACCCATTATAAAATTTACTGCTTGCAGTATATATATCAACATTAATGCAGTAACTGCAGTGTATTAGATATTTCCCTCTATAGGTAGTTGATTCATTCCGTTCCTTAATGATTGAATACAAACGAAGGAACTCCTCTTAATCTCGCGTTTGTTGTATATTACCGTCTAATTCTAAAAATAGC	0.853417	Q14190	RecName: Full=Single-minded homolog 2; AltName: Full=Class E basic helix-loop-helix protein 15; Short=bHLHe15
LYa_b1_contig_39027 (1..300) consensus	30.2695	0	TTCATCTGTTCCGTTATATCTTCCCCATTTTCCAAGCAAAGTATCAAGTGCGCATCATTGGATGAATTTTTAATATCTGTTAAGTCTGTAGCACTACATATTTGTTTTATATTTTTTGCGTCTACGAGTTTCCTGGTTAATTCCTTGTTGACGAACGCTATAGCTTTTTCGTTTCCAACTACCATTTGTATCTGATTTTGGTCAACTGCAATTCCAAGTTCTGGTTGTTTTTTCTCGTAGAAATGATATCCACCGGCCAAAATGACAAAGGTACCGATAGACATTGTCGAAGCGTGGGCA	1.5171	P47312	RecName: Full=Transketolase; Short=TK
LYa_b1_contig_137386 (1..699) consensus	29.8123	0	TATGTAAAACAAATGACATGGATGTCCATTGATACTTTGATGCATATCCTTTATATAACACAACGGCCTCACTATTTTTATGTTTAAAACCCAAGGAATAAATCCACCTCCATACACATCTTCCAGCCAAAAAAACGGAACAACAGCTGTCCCTTTATACATTTGTCGAATAACATTAATAGACATGATGGAGGAAGGTCCTGCACAATAAGGTGGATACGTTGGAAACGGATATTCAGCGTGAGGCGTATACCACTTGTTTTTAGGGTTACGGTAAGGTCTAGCTCCGGAAACGATTTTGCATTCTAAAACGTTTGTAACGTTCTTGTTGTGCTTATTGTTAAGATAAAGAATTAACATTGGAATGTTAATAGTGATGTCATCGTCAATTTTGATGAC…	1.65e-39	O54904	RecName: Full=Beta-1,3-galactosyltransferase 1; Short=Beta-1,3-GalTase 1; Short=Beta3Gal-T1; Short=Beta3GalT1; AltName: Full=UDP-Gal:betaGlcNAc beta 1,3-galactosyltransferase-I; AltName: Full=UDP-galactose:beta-N-acetyl-glucosamine-beta-1,3-galactosyltransferase 1 >gi|61211788|sp|Q7JK24.1|B3GT1_GORGO RecName: Full=Beta-1,3-galactosyltransferase 1; Short=Beta-1,3-GalTase 1; Short=Beta3Gal-T1; Shor…
LYa_b1_contig_96655 (1..1149) consensus	29.3663	0	TTCCCCCTTTTCCACCAGAATTTCCCATCTTATGGTATTTCGTATCTGAAAGCATTTTTATATATCTTCAGTTAGGTTTTATGTGGATATTTACTACAATATAACTTGAACACCGTCCGGCTCCATAAAATAAGAAGATGGGATATGATTGCCAGTTAAACCAAACAAAAGAGTTCAATGCACCAGATTTATATAACTATATGTCAACGCATACACCTTAACAATAAACAAAACTTAGCTAAAGTCCTTGACATGAATAACTGTAAAATAACTTTTAAAAACCTAACAGCCTGAAATATTCAAATCATATAAAAATCATTTGAAAATATATTCTGTACTGTAATATCAACGACAATTAGACTTTCCGTGAAAACTGCAATTGTCGTCAAGAAAATCACG…	0	not available	not available
LYa_b1_contig_88935 (1..852) consensus	29.3397	0	CGAGAAATCTAGTATACGATCTCCATTCATGCTCATAAACACTTCGTAAACACGTTTTGTTCATTTTCAATGCAATTTCCGTCCCTGTAAAACATATGTGATCGGGATTTGTTCATTGTGAACTGCATTATTATTTTTTATCAAACCAGAGATATCATATTAAACAAGTGATGCTGATACATAACCTATTCATAGTTTTTATATTTACTCATTACTATAATTATTGAGATTGTCAAGGTGTGTGGCTTGTTTTGAATGCATCATTGTGACTTTGAAATGAACAGCAAAATAACAAGTGTACCTTGGTTTAAATTGGGTTTGGTCAAGTGTGTTGGGATTTTGTATCATGAAATAATGCATCATATGCCCTATTTCTTTTTAATTTCCTTTGTGCCTTAA…	0	not available	not available
LYa_b1_contig_2214 (66..900) consensus	27.9996	0	GAAAACACACAGCATATATTGGAGATATTTGTTTACATGCCAGCATTCCAATTTCGAGGAATTTTTTAACAACGTGTCAAAAATAAATCGAAGAATGTTATGTTAAATAGTATGTTATTATTAGAGCTCGGTACTCTCTTGTATTCAAGCAGGAGTCACAATTAAAGATTGTAACCGGAATAAAAACCAGAAGTGTCAAATATGTTTCTTGCAGTACTTTTTCCAGTTATTTTGTCGAGCAATTTAGTCATGACTAATGACAATATTAAGACATTCAGGGTAAACGTCAAGGTACCCGGTGGAAGAATCAATGAGGATATTGCTGTTGATCGGAAAAAAAATACAATGACTGTCAATGTCGGGGATGTGTCTCATCTGAATAGCACTTGGTGCCTAACA…	0.0009885	Q9CQS6	RecName: Full=Gastrokine-2; AltName: Full=Blottin; Flags: Precursor
LYa_b1_contig_17432 (17..739) consensus	27.3898	0	AAAAACGACAAAAAAGATTTAAGGACAATTTAGGCCAAATTCTGCATAACCAGGAGAAAAAAGGTCACTTGCGAAATGTTTTCTTTGTTTCTAATATTGAGGATAATGATATAGTTTTTGAAGAGATAAGAAAAGAAATTTCACGTCATGCCATGGATATGGAGAATTGGGGCAAAGTCTGTCCGTTAAAATGGCTTCTGTTTCAACAAGTGTTATTAAAGCTAAAAGACAGCAATGTTCCAATTTTACCAACCTCTACATTGTTAAAAATTGCAAAACATGACGATATTGGCATAAGTGACAAAAACGAGGTCGAACGTTGTTTGCAATATTGTCATAACATGGGAACAGTTGTCTACTTTGACGATGAAAAATTAGCAGATTATGTTATTTTGGACC…	5.108e-06	Q55E58	RecName: Full=Probable serine/threonine-protein kinase pats1; AltName: Full=Protein associated with the transduction of signal 1
LYa_b1_contig_5474 (984..2764) consensus	26.462	0	ATAATAAATTTTAATTAAAAAGTTCACGAAACAGTTCCTAAAAACAAGATTTTTTTAATTTTGGGTTAATAAAACACAGTTGCCATGGCAACACAAAACTGAAATATCCCTTTTACGGGTCAACCGTTTTTGTAAAAAAACTGTGAACATAAGGATTTTACTATTTGCATTATAATGAGCTAATAAAATTGATATGCTCCCGAACTCGTTTTTACGAAAATAGTCGTAATGTATTCATTACTTCATTTCTGTGAAACACAAAAAATTCGTTCTTGGTGGATTAGCAAAGATGATTTTAAAATTGAAAGTCATATATATATTTATGACTAAGCAGGGAAAAGCCCTGAAGGAGTCAAATAGATTACTAGTATGATTTGTCAAATTGTTACACATGATGTT…	5.73225	A7XUY5	RecName: Full=Selection and upkeep of intraepithelial T-cells protein 5; Short=Skint-5; Flags: Precursor
LYa_b1_contig_7770 (35..643) consensus	26.4107	0	AAAAAAAACAATTAAACTATTGTACAAATAAAATAAACAGCAGCATAGTAAGACTTATAAAAATTAAATATCACAAAAACAAACAAATTTCCAAAATGATCTAGAATAAACATTCATCGTACGAGAAACACCAGGGACACAAGGATGGGTACCACGTACATGTATGATAAAGATGCGAATTTGACAACTCCACTGCACATGGTAGGACTTGTGGCTGGTGATGCAGTATAACCTGCATCACATTTACAGGTAGTGTCACATGTAGCATGTTCTACACATTGAGTTGCAGCACAATTTTCCTCTGGTTTCTTTCTGGCTGCACAAGCGCCTCCATCACCATAGTAGTCGGCTGTACACTGACATTTATAATTTGAAGTGCCACTTTCGAGACTGCATTCC…	2.402	P81824	RecName: Full=Platelet-aggregating proteinase PA-BJ; AltName: Full=Snake venom serine protease; Short=SVSP; Flags: Precursor
LYa_b1_contig_154459 (1..505) consensus	25.7445	0	ACGGAACTTGCTTCGATGGGACAATAGGATGTTGCGAGTGTTCAATAGGAAAATGCTGCGATGCGACAGGAGTGAGCTGCAACTGTTCAGACGGAAAATGCGCTGTGACTATCGGATGTTGCGAATGGTCAACCGGAAATTGCTGTGCGGGAACAGGGACTTGTTTGAAGTGTCCAGAAAAATGCAAATGTTTTGAGGGAAAAGGCTGCGATGAATGCAAATGCGATGACCCAAGCGAGTGTTTTAAATCTTTATATGGGAAAAGTTGCGGTGGTTCAGACGATTTAATGAAATGTTCAAACGCATGTTCTAATCCTTTTGATTATGAACCTCTTGCATGTAACGTGCGACTTGCCCTTATTGTTAATATCTTTTATTGGGTATTGTATGTATATAGCG…	5.29287	Q04592	RecName: Full=Proprotein convertase subtilisin/kexin type 5; AltName: Full=Proprotein convertase 5; Short=PC5; AltName: Full=Proprotein convertase 6; Short=PC6; AltName: Full=Subtilisin-like proprotein convertase 6; Short=SPC6; AltName: Full=Subtilisin/kexin-like protease PC5; Flags: Precursor
LYa_b1_contig_8029 (9..307) consensus	25.6251	0	AGAAAAATAAGAATGATAATTTCCATGGACAGTTTCTTTACCCCTTGTTCTATGCTTGATGTAGACTTGATCCCCCTTTTTTAGTTCAACAATCCAGTTATTGTTGCTGGCGCTGGCATGATGAACAGTTGACCTACTGGTGAATCCCATCGAGAACATGCTGTTGTTTTTGAACAAATAGTAGTGGATATGGGATGAAGAAGCTCCCATCATGACACACGATATCATGTACACTCCACCTCGGGGTGCTGTAAATTTTCCTGTCTTTGGATTATAGGCTTGACCAATATTTGTTGTCA	1.45e-07	Q9ES30	RecName: Full=Complement C1q tumor necrosis factor-related protein 3; AltName: Full=Collagenous repeat-containing sequence 26 kDa protein; Short=CORS26; AltName: Full=Secretory protein CORS26; Flags: Precursor
LYa_b1_contig_71933 (117..797) consensus	25.5643	0	TTCATCTCATAATTTACATTAATGAATTTAAGGTATTATGATACATGTGTTTTCATTGTATTTACATATCACGCATTTATTATTTATTGTTTGTTTACTTATGTTTATGTTTATGTTATTTAGATTTTTGGGTTTTAAGCCATGGTCAGAAACTATGACGAATTTTTTGGTTGCAAACACTGAAAATTCTGACGTTTCGGTAGACGGGCATAAGACGTTTGCGCTTTTTTTGTGTGCACTTGCATTGGTGTTATGTAAATCAGTCACGTTTTAATCAGTTTGTTTATTTGGTTGGTTTAATTGGTCAATCTGCTATTGAAAGAACATGTGATAAGCAAACTATGCAATGTTTTCGGTTTAAGTATTATAAGATGTTGTTTCAGACTCAATTGATTGTTA…	0	not available	not available
LYa_b1_contig_39125 (1..353) consensus	24.6894	0	CTATCACTTTTCGCAAATAAATGATATATGACCGGTACAAAGTCCGTCATTCCATTGGCCATCTATCGGACGCATCTCAACACAGTTTTCTTGTCCACCAGTAGAGTTAGGTTCCCCTGATCGCCAGTTGAAATAAGTTTGTCTCTCCTGAGATGTCGCTTTTTGCCAAGCGCCTTCCGAGTACATGTCCGTTATGCCAAGCCAACATGATGGAAACCTTCTATTCCTTGCCATTCTGAGTAGTTTCTTATATTCCAAATAATTGTCAATTTCGACCAGTTTTCCACCAATCGTTTTGCAAAAACTCATTGCACTGTAGAAAGGTGCTCTAAACCGACTGAAAAGGTAGCAGT	7.046e-18	P02707	RecName: Full=Hepatic lectin
LYa_b1_contig_70869 (91..1669) consensus	24.0501	0	CAAACATCATCTTTATGTAAAGGGAAGCATTACGTCATTATAAATTATGTGAAATGCAAAAGATCTCTTGATAATAAGGTCTCTTTGGTTTAAAAGTCAATCAACAATTGATTTCCCCCAAAAAGCATTCTGCCGTCTCTCCCTAATTATTATATTGTTCCGTTTAAATTATTCACTAAATATGCTGTACTTCGTTTGAAATTTTGTCCACCAATTATACCTACAATCTTCACAATGTCATGCCAGTATTTTTCAAATTTGAGCGAGTCCAGACAGCCTTCAATTTGTCCAATTTTATATACATATTTTTGAAGATCTTCTATTGCACGCCATTCTGTTCGAGATAATGTTTCGTTATTTTTTCGGACAATCCACATCAACTGAGTCATCAATTGCATA…	2.757e-05	A2ASS6	RecName: Full=Titin; AltName: Full=Connectin
LYa_b1_contig_1598 (1..770) consensus	23.9214	0	GAGGAAGCAAAGATAACATTCGAAATCGCATTGAAAAAAGTTTAGATTTGCAAGAATAGATGTGAAGTTTATTGGCTACGTATGAAAATATAAAAATCATAAAACAAAATAACAATCAGACCATATGAATGTCCTGTCGCAAACTATTGTTATAATTCGATAATCACTCAAAATGTTCTGGCAGGTTCTGATGATCAACGAACTTTACCCCCAAATCACACATTTCTTTGCAGGATTCATGTAGGTTCCTGCTTGGCAATTAAATGTTTTGGAAAATTCATCAAAATTCTGAAGAGGTCCAACGACCCTAGAACGAGCATCACTGTGAGAATCTACACGTATTCTTCTTACTGCTTCTTTTGGTCTAATGATTCCACACCATACTTGAGCGGCATTCAA…	1.269e-62	O44857	RecName: Full=Neprilysin-2
LYa_b1_contig_127037 (127..1945) consensus	23.8096	0	GTCCATTGAAAGATTTGATGTTGAATTTTTCTGTAAATGTTTTATGATGTTCTTAAGCACCTGTATTCTCATCTCAAAACCTTCTCTCTTTTTTTTCATCTCTTTGTCGGCGAGATTCTGAATGTATTCCGTAGCAGCAAGTGCATCTTTTGTAATGGCCTTTCTGTTTATCTCGTTGATACAATTTTCAATATTATCAATTGTATTTTTAAGTAGTTTAAATGTTTCTTCTCTTTTTTCGTGCCTTGCTGTTACCTCCTCACCTGAATAAAATTTTTTCACGTACTTTAGGTGATACATTTTTCGGCTTAACTCATGATTTTTGGCATAACATTTCCCAGTGCAAACTGTACATTTGCCGTCTATTATAGCTTCGCAGGTAAAACTAAGCGTGTTTAA…	0.006912	Q9T0F4	RecName: Full=Immune-associated nucleotide-binding protein 13; Short=AtIAN13; AltName: Full=AIG1-like protein
LYa_b1_contig_44688 (36..1422) consensus	23.5233	0	TTGGAATAGAGAATACTTCTGTTACATAAATCTGTGAAAACTTGAGAGTGAGCACGGATGCAGCCAATTTCATTTTTGACAAAACAATCTGAAAGTGACATATTATGGCATATTTGATAGATTTGTCATATTTAAGCTTGAATTTGAGCGTCTTTAATGACTAAATCAGTTCAAATCTTTCACATAAACTAATTGAATCGACTGAAGTGGACACTTGAGTGTTTAAAAAGTGTCCAAAATTTTTCTTCTGATAAACCTAAAATTTTAGGCCAGAATCCGCCCTTACTGGACCTTCTCCTTTGGACCAGTTGTTTCAGAGGACAAGATTTTTGTAACACAGAGGACAACACCAGACGCCAAGTGATGAGAAAAGTTAACTAGATGTGACGGCAAACAAGT…	5.107e-09	Q03565	RecName: Full=Barrier-to-autointegration factor 1
LYa_b1_contig_114316 (12..485) consensus	22.2716	0	GTTGATCATAAAGTTTCGAAGTATTCAAAAATATATAGTAGTTACAGCATAATGTAATGCATATTTTACACAACACAGTTTAGCAATGACATATCATACAATTGTTTGACCAAACAAATTACTAATTTGACATAACACAGAGATGCCGTGTCAGGAAATAAAGGCATCTGCACATAACATAAAGAAGAAATGACAGGACGTAAAGGCAAAGCGACAAAACACATCAAATATTTACACTATAAGACAATTCCGGCGTTCCATACTATGGCATTGTTTCAGTATTGAATATCAACGTGATCTTCTAAAACTTTTATCTTCAAATACACAATATCTCTCATGCATCAAAGTCTTAAAATATACAGTCCCAATCAACAAAAATAAACTGCTCGGAAGGATCTT…	1.85363	Q9NEQ0	RecName: Full=Omega-3 fatty acid desaturase fat-1; AltName: Full=Fatty acid desaturase 1
LYa_b1_contig_50236 (1..519) consensus	22.1769	0	AAATCAGCATTCATCCTTCAGTTTTCCTTCCTCTTTTAACAGAACGTTGACAGATAAACATGCGTTTGCTATAGCATTCAGTGTCGTGCCAGTAGAATCCGTTGTAATGGAACCAGACTACGCAATTTGCCCTTTTCCCTTCTGCTGGTTCTCCAGGGTACCAGATGTTGTACGACATCGGCTCTAAATTCTCAATCCAGACCCAGCGTCCTTCAGTAAACATGTCCGTAGCACCAATCCATACGTTGTTAGAAGAAACTCTTGTCATAGACATGATAAACCTCATTTCTTTTTCATTAGAAACTGTCGCTAGGAATCCGCCAATCGAATTACATACACTCTGAGCGTCCATCCATGTCATTGGCTCTTCGACGTACATGTATTGCTTGTTCCGAAACT…	1.512e-14	P10716	RecName: Full=C-type lectin domain family 4 member F; AltName: Full=C-type lectin superfamily member 13; Short=C-type lectin 13; AltName: Full=Kupffer cell receptor
LYa_b1_contig_22633 (43..1628) consensus	21.9722	0	CATAAGTTGAAAATGTATAGACACGTGTATTTCAAATGAAATAACTTTTAGAAATATTGCATGATTAAGAGAATTTGAATGACATTTTCATCAGGTAACACTTATCAATGATCGACTGTTTTAAATCAATCATGCATCATATAGCTACCCTGCGTGCATGTCTACGTTGACAGAAAGGTTGGAAAACACTGATACAAGATCAGCTATAGGTTTATCTATCTTGTCTTTAACTTCCACATACGAATAGTTCTCACTGTCGTCTTCTGTTGAAAGTATTCCAATGATATCATTTATATATTGGCATACTTTTCTTTTCTTTTCTTCATTAAACAAGTATGTGGAAACAAAATTTAAATGCATAAAGGTACATTTTTCATCAAAATGAACACCTTTATCATG…	1.74718	Q914N0	RecName: Full=Capsid protein
LYa_b1_contig_6214 (206..784) consensus	21.9261	0	CTAGCATGTGTGTATAATGATGCAAACCACAGGCGCATGTATATCTACAGTTAATGTCATCGTTAGTAAAATTTTTGATCTTGAGACCAAAATTCGGACTTTTGTCCTCCACCATCATTTCATATTTGGATGTATACGAGGAGGAACATGTTGTATTAAAGCAGAGTAAATCCTGATGTGGTCCCCCAATCCACTTCTTGATACTTTTAGATGAGCAAGCTGTACCATCACAATTTAGCAAAACATCTCCTCCGAAGACCATGTATTTTGATTTTATGAACCAACGTATGCTAATAACCACTGGTGACAGGCAAAAAATTATTGCTGTATAAATTACAATACTGTGTTCAATGGACTTCTTCATCCTTTCAATCCACTTTGTAAAGTTACCTTCTTCTG…	1.15662	A9VML1	RecName: Full=UPF0303 protein BcerKBAB4_3106
LYa_b1_contig_36611 (250..7905) consensus	21.9252	0	CTTCATTTGTACAACACTATGTTAAAACTTTAATATGTAACAATTTTGTTTTGTTTCAGGATTTATATCTTAACGGTATTCAAATCGGAAACAATTGACCGATTTGCTTGTATTCCAACATAAAGCAGGACCCAGACCTTACTTTCTAGGAGATAAAGATAAAAATAAAATCTTGTCCAAGACTTATAACTTAGTTGTCTGTAATTGATAACGCCTGTCGCTTCTTAACACAGATTTCAGTGGGTGATTTCATCTCATATATCCAATAAAAATTGAAATGAATAATGATGTAAGAATCTAGTCTGAATATTGACACATATGGACGATCTCCCATTATAGTCTTTGACCAATGCGATAATTTTAACTATTGTCATATTCCCATTTTTTTTATAAGTAACG…	3.202e-111	P16157	RecName: Full=Ankyrin-1; Short=ANK-1; AltName: Full=Ankyrin-R; AltName: Full=Erythrocyte ankyrin
LYa_b1_contig_17454 (1495..2935) consensus	21.8548	0	GTAGTCTAGCAATAGTTGAGTTATTATTAGATAACAATGCTGACTGTAATATATGTATCTATAGTAAAGGCCGTTTGACGGACATATTTACTTACCGTGCGTTAGACTCAATATTGATTGAAGAAAAATATAATACTTACAATACCTTAATAAATAATGCACCACTAAAAGTACAAGATTATATCAGGAAGAAGCCAGGACATAATGACAGTAAGGGGTCAACCGGTTACAACACAATGGTACAGTATGCCTTTAGGATAGTAGCAGGTTCTTCACCATTACAAATAGCCTGTTTTATGGGAAGGGTAGATATAGTCCTTTGTCTTCTGAACCACAATGCTGACATTAACATGACAAAAGAAGATGGCACAACTCCATTATCCTATGCATGTGAAGTAG…	4.033e-32	Q9ULJ7	RecName: Full=Ankyrin repeat domain-containing protein 50
LYa_b1_contig_23136 (2399..4227) consensus	21.3065	0	GAATATCGTTCTTTGGGATTTACTGTGCTCTTAAAAATTAAGATCGACAACCGGTGCCTTTTTCAGACGACATAGGATCGCTTGAATTAAAAATATTTGTCGAGCATAACGAATCAATAGCCGTGTGGAGAAAGCGATACTCTAAAGACAAACAAAAAAGTGGGAACAAAGGTTAGATAAAATTACGGGAACCAATCTTATCAATAACGAAAACGAATTAAATAATTAGAAAGTTAGAATAAAAGATTAATATGACAAAAAAAGACGAGGCAGTCAGAATTAGGTCTAGGGTTAATTGGTACGAGAAAGGCAACAAATCTACAGGTTGCTTCTTTAATCTCGAAAAAAGAGGAGCGTGGAAAAATTATGGACTTGATTTAAAGGTTTTAGAAGAACAAG…	6.117e-15	P14381	RecName: Full=Transposon TX1 uncharacterized 149 kDa protein; AltName: Full=ORF 2
LYa_b1_contig_65496 (1..289) consensus	21.2355	0	GATCTTGCAAGGTTTGTCGTTCCATTTCCCTCCGGAATTTGGGTACATCTCTAAACAGTTTTCACTAGTTCCACCATTCGGTTCATTACCATGCCATTTAAAATATTTAACAGGTTGAAAGTCTAACACCCATATCCACTTGTCTGAATCACAGTCAGTAGCTCCCAACCATGCATTGTTTACTTTAGCTTCTTTAAATTTCGACATTACCCAGTTGTTTTCATTGTCATCCTTAATGTTGACGAGAGATGAACCTTTTGATCGGCAAAAACGCTCAGCTTCAAACCAA	1.53e-10	Q2LK94	RecName: Full=Collectin-11; AltName: Full=Collectin-2; Short=CL-2; Short=cCL-2; Flags: Precursor
LYa_b1_contig_34023 (2..1879) consensus	21.1306	0	TACATGTAAAAGATTTTCAAAAACAAAAATGGGGGTCACTGGTCAAATTTTTTCAAGGCATTCAAATGGATAAAACCAGAGGATTCCGAAAATTTGACAAAAATCCAAAACATGACAAGCGAACATCCATAATGATGATAACGAAATTGTAAAATCTTTAAAAAAAGTATTCTTTCTCGTTAAGGTCCGAATCCTGACTTTCTGGTTCAGTTGGCGCTGACGATGTTTCTATCACATGATGTTCTGAGGGTTCTACTTCATCCAGATAACGGAGTTTATATGGAAGTAGTGGATGCATTGAAGGTATTGGTACAGATGGACGAGTAAAGTGCATTTTTTGTTCATTTCTGAAAAAGTGGTTAGTTTCCTTTCTAACGAAATCGTGTAGAGGAAAATCTG…	7.03685	Q6RJR6	RecName: Full=Reticulon-3
LYa_b1_contig_87687 (259..876) consensus	20.9875	0	AGCAAAAACCATCTAATAATACATGATAACTTGTGGAATAATTGGTTTCGTTTTTATTAGAAATGAGATTGGTTCATATTGCAGCATTAACATGTTAACAGAACATTTTGATTTAAACAAAAACGTTTGATACGTCATACAGAACATAACGCATATAAATTCAGAGTTTAGTAGAAGGTCCGTAAATAAATCGTTCAAAATCAGATGAATTTCGTATGTAGCATGTGTGGTACGGAATTTAAGGCGTGAACATTCTTATTCAACGTTTAAACAGCTATAACTACTACTACTTGAAAGGAAGGTACAACTAACTTAATTTTAATCCAGAGATGAAGTTATTTATATTGCGAAAATGTAAGCCGCAGTTGCGTCACTTTTTCGGCTGCATATCGCAATAAG…	0	not available	not available
LYa_b1_contig_1249 (49..547) consensus	19.7636	0	GTTATGTAATGTATGAAAATGTTTCTGATATCAAAATATGTATCAAGTTATGTATCACAATATGTATCAAGTTATGTAACACAATATGTATCAAGTTATGTAACACAATATGTATCAAGTTACATTAGATGTTATGTATCATAATCATCATCATCATGCTTCCTCTTAAGAGTATTGTTTGTTATGAGTGAGGCTGTAGACTGGGAGATCTGTAATGTCTTAGACAATAAAGCTGAAGGATGTAGTGCAGATGACATTGGCTGGCTGGCATGAATGGGCTGTAAATTTGTACCTGCTGATATTCTGAATGCTGGTCTTTGCACCATTGTTGATGCTTGTGGTTTAGTTACTATGGTAACAGTAGGAACTGACATGTTTTTGGTTACAACACTTAGGTTT…	3.96342	C1CQY4	RecName: Full=3-phosphoshikimate 1-carboxyvinyltransferase; AltName: Full=5-enolpyruvylshikimate-3-phosphate synthase; Short=EPSP synthase; Short=EPSPS
LYa_b1_contig_42387 (1..1363) consensus	19.7231	0	CTTCAATCTGAAAAGCAGTTTCTGTGTCCATTTTACATTCAAATTGTTGCCGAACACTTTTCCCTTCCTCGTCAGAAATGATTGTGGCTAGCACTTCTTTGAATCTGCATGAATACAGTTTTGTAGGTCTGTTATGCTGTTCAAATCGTCCTAACATATCATGTGTGATATCACACAACTCATTAAAGCGTGCATCATTAAGTGCATATGTCGAAGAATGCTGCAGTTCATTCCGTGTAAGTCTTATGCGTTCTATGTCGTCACCAATAGCTGTATCTGTGTTTTGAATATGATGCCATGCCCCTCCCCAGGGTCCATTATAACGGTTGCTTGAATTACTCGGTTTGTGTTTATTGAGATTTCTGTGTTTATTGTACAATTGTGTTATATCATATTCGC…	0.980226	Q5HQ24	RecName: Full=Glutamate racemase
LYa_b1_contig_17323 (9..2005) consensus	19.4682	0	AGTACATGGATGCCCCATCCGCACTATCATTTTCTATGTTCAGGGACCGTGAAAATTAGAAAGATCATATCATAGGGAACATGTGTACTAAGTTTCATGTTGATTGGACTTTAACTTCATCAAAAACTACCTCGACCAAAAACTTCAACCTGAAGCGGAACCGACGGACGGACGAATGGACATACGAAAGAACAGACGGACGCCCAGACCAGAAAACATAATGGCCATAAATGGGCTAAAAATACCATCCATTACCACTTATACTCAAAATAAAGAGGTTGCTTAGTTGTTCTAAATTATACAGAGATACAGGTTCGAAACATCAGACATCTTACAAAAATATCTGATTATACAACAGACTCGTTAATGCGCTTCTTTTTTCCAGATGGCTTGACTTTT…	4.833e-20	Q9WYX8	RecName: Full=Uncharacterized protein TM_0508
LYa_b1_contig_40912 (11..4284) consensus	19.4655	0	AAATAACAATTACGAGTTGTTGTTATTTGATAATGCTCAAATAGGTGTCAAACATATCTATTTTAAATGCAATGAATGCAGCCAGTACCCTTTACGAGGAATAAGGTGGACATGTATTACATGCACAGATTATAACATGTGTACAGATTGCTACATGGCATCGGAGCATGACCTTAGTCACCCATTTCAAAGAATCCTCAGTACAAATTCAAAACGTGTACATATGCAACCACGAGAAAACCTTGACGTCACACGTGCCACTGGTATTCATCTTAACTCAGTGGTTCAACTGCGAAGTAATCCTAAACAAAAAGGTCAAGTGCAACAATTTCTGGAGAAGAAGATTGAGACATTCAGGTCTGATGCAAAAGTGAAATGGAATGACGATTCGGAAGAAAG…	1.08e-26	Q5ZIJ9	RecName: Full=E3 ubiquitin-protein ligase MIB2; AltName: Full=Mind bomb homolog 2; AltName: Full=RING-type E3 ubiquitin transferase MIB2
LYa_b1_contig_76334 (1..1798) consensus	19.4098	0	CCTTGTTTTGAATAATCTCGTGATTGAAATACGTGTTACCTTCTGATTTCCTTGGTAATTGATTACCCCTTATATATTTATCTTGAGGCGAAGTTGACCTTCGTCTGTAGATAATGACAGCAAGTACAACTAATATAATGACTATAACGACACCACTAATACTTCCTCCAATGGCTGGACCAGGACTTGATGGCGACTCTCGAGTGTCTTTATGTGCACAAAGAACACCACTAAATCCAACTTTACATTTAGCGTCACAACTGCCGTTAAATCTATTACACGAATGGTTAAAACATCCACCACAGAACTCTTTACAGTTGTATCCAAAATAACCGTCACCGCATTCTTGATCGCATGAGCTACCTGTCCATCCCATTTGGCAACCATCATATGAACATT…	3.147e-26	A8XMW6	RecName: Full=Cell death abnormality protein 1; Flags: Precursor
LYa_b1_contig_49801 (1..319) consensus	19.2991	0	AATGTTGACGAGAGATGAACCTTTTGATCGGCAAAAACGCTCAGCTTCAAACCAACTTTTCTTGTGTTTGCTAACAAAGTAACAATGATCTCTAAAACGGTCCCAGTCTTTACTACAACCATCATTTCCAACAATGTGTTTTTCTTTAAGGCCCTTTTCCAAGTCAGAGATAGTTTTTTCAAAACCTTTTAACTGGTTTCTTAATTGATTCAAATGACCTTTTTCTTTGGTTTCAAGGCATACATTATTTCCACCAACCTGAACATATGTAGCAACCAGAACAACCAAAAGAGCAATCATTCTTGATCTTCAAAAGATA	2.157e-06	P55067	RecName: Full=Neurocan core protein; AltName: Full=245 kDa early postnatal core glycoprotein; AltName: Full=Chondroitin sulfate proteoglycan 3; Contains: RecName: Full=150 kDa adult core glycoprotein; Flags: Precursor
LYa_b1_contig_53555 (1..413) consensus	19.2857	0	CACGTGTCAAACGGTTCATTGATTTTCGGCACTTCAAAGTAAAACGGGCACGTGTCTAAATAATGTTGAATATCTCGTTTATTTATGATTATTTTTCTATAAAAATGGAAATTTAAGCATTAAATTTCAATCTCTAACATAATATGTAAAAATAATACGTATAACAGCAGTCCTTCTAGTCCTTAGTGGCATTGTATAGTCCTTAGTGCACTAAGGACTCCTTAGCAGTGTTTAGACGCACCCTTTACATGGAGAATAGTACAATTGCAGAGACGCTTAACATGACCAATATTGATTTGAAAGGTTTTATCATCGCCACATCTGAAGCTGAACCTCCACTAAGATCCTTTGTCGACTGAAAGTCCACAACTGCACTGGATTTGGCAGTGAATGAATGCC…	9.92911	Q8BGA3	RecName: Full=Leucine-rich repeat transmembrane neuronal protein 2; Flags: Precursor
LYa_b1_contig_5330 (1..2825) consensus	19.2652	0	GTACAAAGGCATAGCAGATATACCACGGCCAAAAACAAAAAGATGGAGGAAGATGGATGCTCAAATATAAAAGAGTCTGATGGTAGATTGGAGGTATTCATATCTCATAGCAATGACTCTGAAGATGAACAAATTGTTAGTGAGATAGTTGTTCCAAAATTAGAAGCAAAGAACATAAAGATTTGTGGACAAGATGAATTAAGACCAGGAAATCTTGTTTTGCCTGAAATTACCAAATTGATACATAAGATAGACAAAACCTTGCTGTTCATGTCAAAGAATTCATTAAAAAGTCCTTGGTGTTCATTTGAGTTGTTGATCAGTTTAGAGAAATCACAGAGAAACAACAGACTTGCTGTTGTTTTGTTACTTTATGAAATAGAGGAATCCGAGCTTCCA…	8.76e-08	A8E5V9	RecName: Full=Stimulator of interferon genes protein; Short=STING; AltName: Full=Transmembrane protein 173
LYa_b1_contig_31895 (21..1199) consensus	19.1212	0	GTTTTTAATATCCAGACATCTAAATGATGATATGTGAAATAGCAAAGTCAAAATTAATTGTTTTTATGCATATGATGATTGTCTAGTATGTATTCTCACACGAAGCCTGATGATTAAACATTACAAGTGCTATCCATGAGTTCATTCCCTTTGTCTACAGTACGTACAACTCGATTTTGTGATCTATCAAACACGTGCATCGTTGATCTTCCTTTAAAGAACAAAATAGTGCTTTCATCTCGAATAACAGCAGCGTCAATCCTATTAGGTACTCCAGGAAACTCATTCCCAATGTATCGATGACTTCCGGAAATAACTCTCCCAGTGTTAGGATTCAGTTTCCATACTTGACTAGCTCCAAACACAGAAATGTCGTTTGAACTAAAAGATAAAGCTGCC…	1.242e-35	O77656	RecName: Full=Collagenase 3; AltName: Full=Matrix metalloproteinase-13; Short=MMP-13; Flags: Precursor
LYa_b1_contig_17507 (1..663) consensus	19.0492	0	CCTCTTCTTTGAATTTTCTTTTCTTCATGTTAGTTTTTGAAACACAGTTGTTGCTGCTATCTGAACTGTAGTCTGAATTGGTCAATGTAATTTGACCTCCATTTGGAATGTTGATTTGGTCCCCGTCTTCATTTGCAGACTTTGAAGTGACTGAAGATATTGAATCTGATGAGCCCATATCACTTGTTGGAGAGACTTGTGTGTGAAAATGAAGACTTTGAGAGTCTTTTGTGGCACTGCTGGTGTCATCTGAATTGGTAGTTGATTGATTAGAAGTAGCAATATTTTGGCTCAATTGACTGATTTGTTTTGTTGAAGAGGTTGATTGATCAAAATCAATTGTTGAACATAAAGCTGTTTCTTCGGTTGATATTTTATGTTGATGTTTGATGTCACTTT…	0	not available	not available
LYa_b1_contig_199020 (397..6477) consensus	18.8827	0	TCAGTTAACAACAATGTAGATTGTGCAAAACCTACTTCTATCTATGATGAGTTTATGTACAAGATAATAACCTAAACATGAAAAACTAAAGCAAAGTCCCTATATTCCCTATGAAATTAAAGAACTCTTAGAAAATAGTTCATATCTACATATTTCACAATGCAAACTGTAAAAGTCGAACTAATGCCTTTCATTTATGATAGGATCTGAGAGAGGCTTAATGAACCGAACACAAGACCTTCAAGAGGAAAATGTGTTAACATATACAGAATAGAGAACAATGCACGAAAGCACAAAAAATGATAAAGAATCTACAACCTAAGTTAAAAAAAAAAATAGCAGTTTAAATTGGGGTGCAGTATAATAAAAACACTTAACTCCAAGGAAAGTCCATAAAAA…	6.344e-144	Q80SU7	RecName: Full=Interferon-induced very large GTPase 1; AltName: Full=Very large-inducible GTPase-1; Short=VLIG-1
LYa_b1_contig_5541 (1..375) consensus	18.7705	0	TGCTCTTGCCTCCTGTCCTGTCATGTACGAACATCCCACTGGATACGTTACATTTAAATATATGGTTTTTGTTTCTCCTTCCTTTATCAGCACTCCATTTTTAAAATCATCGCTGACCTTTATTCCAGCAAAAAATTGTTCGGAAAAATGCTTCTGTCCTGGTGCTCCACGATCTATATATCTTGCTTGAATTGAACATTTAACCAGCATATTCAGTCTAAAAGTATTCTCCCAATGTTTTTGCTGAAGTGTAGCAATACGAATATCGTCGTGTGAAACGTTTACATATCTAGCATTTATCATTTCAACATCGTTAATGTAAAATCGAATGTCGTAGGCGTATTCAGACGTTGCATCATCAGCTTCGCACGTGAA	0.945249	Q58540	RecName: Full=2-phosphosulfolactate phosphatase
LYa_b1_contig_309967 (1..532) consensus	18.719	0	TTTTGTCATTTATCATCATATCAAATGTATTTGTACAATCTTTTAAATCACACCCAGTACAAATCAATTTGATATTATCCGATAAAAGAAATAGGTTGTGTTATCCAGCAATTTTACCGTGACACTTACATTACTTTGATTCAAAATTGTTGTCTTTGTAGTTTTTTTTTTATACAGAAATCAACAGGGTTAAAACGCGGATAGCTATCATTACTGTTCGCTCAAGATGAAAGATGGATAGTCGCATACCTTATGTTTACAATTCCAAATAGTGGACAACTAATGTAAGTACTAGTGCAGTTAATTGTAAAATAGTTGGATGATTAAAGAATAAGTGATTTTTTTGCCAAACTTATGAAAGTATATTTATATGTAAGAATCGAAATTTAAACTTCACAG…	0	not available	not available
LYa_b1_contig_216000 (1..581) consensus	18.6072	0	AAAAGGTTCTGATATTCTGTAGAAGATTGGTTGTTATACACAGTAGGATCAGCAGCTGTATCGTCTGCAAATGTTACTCGGAAAGAGACCCCTGTTGCATTTGTACTAACTGTTGTTGCTTCAGTAGTCATCATTGTAGTCTGTTCTGCAGTTGAAGGGGGAATTCCCGAAGTGGTTACTTGGTCAGTTGTTGTAGAGATTACTGGAGTTGTCAGTTGCTCAGTTGTAGTTGGAATTCCTGGAGTTGTCAGTTGCTCGGTTGTTGTGGGGATTCCTGGAGTTGTCATGTGCTCAGTTGTTGTGGGAATTTCTGTAGTGGTTAGTTGCTCGGTTGAAGTGGATATTCCTGAAGTGATTACCTGCTTAGTTGTTGTTGGAATTCCTGTAGTTGTCAGTTGC…	0	not available	not available
LYa_b1_contig_37596 (12..1789) consensus	18.3478	0	GTCATACTTGTAGCAGCCGGATTTTGGGGTATTTAACTGTCCTTGCATAAACTCAATTATGAGACACAGTCAATACAAAGTTTGTTTTTCCTCAACAACAAAGTTATCTGTGATTCAGTGTATCTGCATGCACTCCAGTATGGGCCACATATAATATTGTCACATTACATCAAGTCTGTTCTAGATTTTCATTATATTCACCATCCTTGCAACATCAGCATCTCCTTCAGAAGCAAATATATTACATCTTCATTCACCTCTTGTATAAATTACCAACCATGGTGAATGTAACATTGACATCAGAAATCTCCAGTAACAGGTCCTCTATAAATGTACAGAACATTGCTTTCCATAACCGATGACATTACAATTGGCGATGGGCTGACATCGTTTATGTGG…	0	not available	not available
LYa_b1_contig_32049 (17..1472) consensus	18.2374	0	GATTTCTTCATTTGCCTGATCAATTGATAAGTTAGACTGCTGCATCTCTGTTTCATTGACAGTAACATGACTAACTAATTTTTCCGGCTTATGAGAAATACGCAGTGCTACTTTTTCTGGCTGATCAGAGGCTGTTCTTGAATATAAAATTTCTTCAGAACTTAATGTTGTATTGTTTTTTATAGAGTTGCGGTCGGCTCCTCGTTCTGACGTTTCAACAGTTCCTATGTGGTGTGTCGTAACTTTTTCTTCATGTTGATTGGATGGTGTTGCATGACTATCATCGACTTCTTTCTGAAACGTCAGTCTTTCTCTATATGGTATTAACAGTCTCGAGTTACGTTCGAATTCTTCATTGTTACCATTTATCTTTTTCCAATTGACATCAGTGGATCTAGT…	0.0103773	O08697	RecName: Full=ADP-ribosylation factor-like protein 2
LYa_b1_contig_451535 (1..559) consensus	18.1568	0	TTAGGAATCTGTCAAACGGAGTGAAAGATTTCCCCCAATGCGGATGGTCCAGATTATTACATGACCCATCAATAGTCCGGTATTTCGCAGATGCATCACATTCAATATCCCCGAAAGTACAAGGAAGTTTGATGAAGCTTGGGTCTGGGAGTTCTGATATGAACCGATCTATCTGTGCCCTGTCTGTTTCTGACAATAATACTGTTGTACTTCGTTTGACTCGTTGTAATCTTTCCTCCGTTGTTGGGATGGTACTTTGCGTAGGAGTTGTTGCCATTTCTTTTTCAGATCTAGCTATAGTCGTTGTTACTGGTTGTCTAGTGGAAAGATCGTATTCTCCTTTTGCATATTCTATCGCACGATGCACAATGTCACCATAGAAAAATCCTTGTTTGTATA…	6.122e-06	Q3UQ28	RecName: Full=Peroxidasin homolog; Flags: Precursor
LYa_b1_contig_189840 (3..679) consensus	17.8644	0	CAAGAAGAATACAACATCATTGCTAACAGTCCTTTGAAACTGGTTTGTAATGTTGAGGCAGCTATAAGTAATGGCGTTACAATCAATACGCCAGATAACACTGCAGTTGTTTCTTGTACACCGACTATTCCATTCCCACCGTCTCCTGCTACGTGTTCGTCATCTGGTGTTTATTCAGGAAGCATTGATGAAACAGCAAATACTGTGACATTGACTACAACTACCCTACCAGGAGATGTTAACGGAACCTGGTCCTGTACCCATGGATCAATTGTTTCAACAATCGTCTTTCCAAATCCTATTCCTTGTTTGGTTTCTGAAAACTTTGTTTTAAGTCCGAGTTCATTGGCTGCAAATGTAACTAGCGATACAACAGCATTCAGCCTAAGTGCAACCTAC…	1.46827	P16294	RecName: Full=Coagulation factor IX; AltName: Full=Christmas factor; Contains: RecName: Full=Coagulation factor IXa light chain; Contains: RecName: Full=Coagulation factor IXa heavy chain; Flags: Precursor
LYa_b1_contig_10617 (124..2186) consensus	17.732	0	GTTTTTAACTGACAAGGTATATGACATTTTATGAGTATATATCTAACGATGTCATGTATGAAAACTGACTGTAACTCAAAAAGTTATTCGTCTAAAATTATATCCGGAGTTTCATCGTCATCATTTTCTGTAAGAAGATCTAGTTGACCTTCGTATTTGTCATCATTGCCCGGATCAAACGCGGATACACTCATTTCTGTATTTCCAAATGTAAAGACTACTTTAACATTTTGCAACTTCTCTGATGGTTTTGCAACCTTAATAATCGATCGTCCGAGGAAATGACATTCATGATCATCAACGTATGTTATATCATTTCCCTTCGTCGAGTATATATTGACCTTGATAACTTCTTGATACGGCTTTGCCGTACTGAATTCTTTTACGATTTCTGTGTCG…	2.976e-80	Q8K0U4	RecName: Full=Heat shock 70 kDa protein 12A
LYa_b1_contig_10202 (441..1299) consensus	17.5564	0	GGTCTTGCTTCAATATTGCTTTTATAAGAAGGCAGATCCTTAGTTTCTGAGTTCACATTTATTTCAGAAGAATCGGGTGTTGTCAAATCCGAGGACGTGGCATGTTCGTTGAATATTCTTTTACCATTATGACCATTTCCAAATGTCTGATAAAGTGAATATGTCTTATTGGCGAACTCCGCAACTGTAACGACACCTCTGAAAATTTCTCCAGCCGACAAAGGATTTTTGTTTACTTCGACTTCTTTTTGTGCACTAGTTTTCTCATGTTCTATTTTTGTCTTAAGTTTTTGCATATCTTTTTCATGTTCTTCTATTTTTTTATGTAACTCCTGTTGATGTTTCATTTCATTACGTTTTAACGTTTCGTCGTGTTCCTGCTGAATTCTTTTTCTAAAA…	1.824e-12	Q9NUV9	RecName: Full=GTPase IMAP family member 4; AltName: Full=Immunity-associated nucleotide 1 protein; Short=IAN-1; Short=hIAN1; AltName: Full=Immunity-associated protein 4
LYa_b1_contig_4040 (1..287) consensus	17.542	0	CAAAACATCATAGATGTCTTCCTGACTGTGTAATAGAGAAAATCCGATCAAGTACCTTATCGCCGATGCCTATAAATGTTACATTAGGGAGGGTGATTTTAAAGCCAACATTTGAACATTTTGATTCGTTACCGATTCAGCATATATCACGCCCATTGCGACAAATTATTTATGGCCTTGTTCTCAAATCATGCACAATTGGTGTGAAAGATGTAACAGAAATAGTGCGTGACAAGAGAAAGATGAAAAAAATACCAATCACACCAGTTGTAGAAGTTGCAGGATAT	0.004523	Q2TB18	RecName: Full=Protein asteroid homolog 1
LYa_b1_contig_57204 (28..441) consensus	17.4417	0	GTTTGAATGTATGCGAAATAATTCACACTTCGACTAGGATCCAGGAATAACAAATTATGCAAAATTATGATTCATGCTAAACACAATAATGAAAAGCTGAATATTGCAGACATTGAAAACACCAAACAATACATGGCGTAAATAAACGATGCTGCTATACCTTTGTAGTAATAGTCAGTCTAGTGTGTAGTGTCAAACAAATTCAGGATAAGCGAAGTTATAGTATGTATTCGTAAATAATGTTAAAAATGTATCGAGATTCCGTATTATGTAATTATCAAGGCTCTGAAGTTGAAATATCGGTTTTCTCCCGGAAAAATATGTCTGAAGACTGTAAAACAGGTTTTGCTGAATACTGGCCATTTACATTTTGATAATGTAGACTGACACTTGAATCAT…	9.32643	Q69UP6	RecName: Full=Protein argonaute 18; Short=OsAGO18
LYa_b1_contig_31388 (29..1722) consensus	17.3594	0	TCCGGCTTTATTGATAAGGTTAATGTTTATATCCTTTTTGATAAGACTTTCCACTATTGGCAGGTGTCCTTGAGCACAAGCCTCCATGAAAGGTGTTGTTTCGTTTTTGTCACATTGATTGAAATCACATCCATTGTCTATCAGAAAGTTTGCCATGTCTGTATTACCGACAGTACAACACCAGTAGAATGGCGTTCGACCTTCATGATCGGCAATGTTTATATGAGCACTTTTGTCAATTAGAAATTTTGCAGTAGAGGGAATTCCTTTGTCACAAACTGCCATTAGAGGTGTCTTGCCGTTATTTTTAGCTTGATTAACATCGCACCCGTTATGTATTAGTAACTTTACTATGTCCGTGTTAACACTTAAACATGATAAATACAATGGCGTTCGCCC…	4.609e-65	Q9ULJ7	RecName: Full=Ankyrin repeat domain-containing protein 50
LYa_b1_contig_13321 (856..1346) consensus	17.2944	0	AAATATTTTCTCGTAAAGCTTAAAAACTAATACTTAAAATACAAATATATATTCTTAAAGATGATCAAAATTCACAACCAATCTTTGCAGCAATCGTTGAGGTTTTTGGAATGTTGTAAAGACAAAATATAATATCTGCCGCCTTGAATAGCTAGTATATCATAAACAAAAATGTCTGCCGCCTTGTAGAACCAATATATCATAAACAAAAATGAAGTGAACTACGTATGATACAAACTGGAAGCGAATACATTTTCAGTGTGAGTTTTGCTCCTCTGTTGTCAAAATGAGAATAATAGACCCACACGATCAACTTAATGAAACAAACCCACACAAACAACTTTTAAAGCCTCAGTAACAATGGAAATATTGAACTTTCCAACGGAAATTACCAAATGT…	0	not available	not available
LYa_b1_contig_20752 (51..1732) consensus	17.1669	0	CTCAATTTGTAAAATAATCTCTGAAAACTTATGTTTTTTTAAATCTTAAACTGAACTAAAATAACAAACCAATGTTCATTGCTCCATCCCCTTCATGACAAATTGTCAATGGTACCTTTGCAATAAGAAAAGAGGATCATTGAACATTCTTTTTGAGAGACAGAAGGATTGTTACCTGTTTATGTAGATAGAAGAGTTTGTAAACAATGTAGAAACTGTTTATAATAATGAATTGATACAACAGTTAATCTTTTTGTGTTTCAATAAAACAATGAGTAAAACGACATATGTCAGATGAATATTAAAAGTAAAACAAAAAATTAGTGTTTACATCATTAGAAATTAATTTCAACTTCTTAGAGAAAGACGCATACAGTTCTGTTTTGTCATTCTGAAAGC…	1.519e-76	Q6INN8	RecName: Full=Deoxynucleoside triphosphate triphosphohydrolase SAMHD1; Short=dNTPase
LYa_b1_contig_41292 (49..486) consensus	17.1107	0	GTTTTGTATTACATGTTAAAATAAATAAATAAATGTTGTTATGAAACAAATATGAATCCTTAAAAAAGTGGCATCCGTAATGCATTTTAGCTTACATTCTAGTTAGTACTTAGTCAATTCGTTTTGATCTTTGCATTTTCAAGGAGCAAAATCGCGCAATGGCAACCCCCGCAAAAACCGGAATGACTCAACTAGACTTTAAGGATCACTCGAGTGCACACTTAATGTACAGACAGTAATGGCAAAATAATTATGCTATAAATAATGCTTTATAATTCTTTGTTATCAGGTATCACAGATGGTCACTGTTAAGATGTCTTAATAAACAGCCATGGCAAAACTTGTATTGTTCATAGTTTGGCACTAGCTTGGAACGCCTGGCTCTCATATGATGTAGAG…	0.0658988	P28192	RecName: Full=Tyrosine-protein phosphatase 4; AltName: Full=Protein-tyrosine phosphatase 4; Flags: Precursor
LYa_b1_contig_46833 (37..2106) consensus	16.9825	0	CTTCAGAGATTTCAAGAATTTTAAGACGAGCAGCTATTCCGCGTTCAGCATTTTGTATAAAGGTTTGTAAAAAGCTGATATAGAATTCCACTCGCTTGTTTTGGTTCCTAACAATAGTTTGTTTGAGCTTTGTTTCAAATCTTTGATAATCTTTTGTGTACTTTTTTTCATCTTCATTGCCTAGCTTTTTACTTGTAAGGCTTATTTGAAAAATCCTGTTGTCGTCCACACCTGGCCATCCCTTCTTCAGTTTATTTAGAATCATTTTCCATGTTCGATTACCAGTGTCAATACTGTCGTCGTTGGGGCAATCGTCGTCGTCGTCTTCGTCAACGATATCCCATTGACTTGTGAGGAAGAAAACCTCCAATGGGTCAAAGCATGGCATGTTTTCAATAT…	9.391e-07	O18412	RecName: Full=Transmembrane GTPase fzo; AltName: Full=Protein fuzzy onions
LYa_b1_contig_11508 (958..3001) consensus	16.5395	0	ATAATGACACAATTGAAGCATTTTTTTTTCTAAATGTACTATTGGCTTTTAGAAGAAAAAAAAATCGATATGTATCGTCACCGGCATGTTTGACTTCTATTTTATTCTACTCTATCATAAGCTGATATCATAAGCTGATATAATTTCATGTTGTTGTCGTTCAGCAGCTAAGTCACTACATACAATTATATAAGGAAGTGATAGTAAAAACGTTGAGTGTTTTGAATTCATATATAATATACACCTCGCCAAAAGTTTAGTAACACCTATATGTTGTTAATCTAATAGTTATCGACAGGTAAGAATAAAGATAATAATGTTATTTCTCTATACCTTAAAAACAGGTTCCCTAAAGCTTCATACAATTTTTGTCCATGCAAGTTTCGTGCAATGAACTGA…	0.229997	P35072	RecName: Full=Transposable element Tcb1 transposase; AltName: Full=Transposable element Barney transposase
LYa_b1_contig_144549 (76..800) consensus	16.4438	0	TTTAAGTTTAGAACTAAGTATCTTCTATTTTGGGAATTTACAAGATAAGATTCATATAATTTAATTAAGGATATGCCTCCTCTAACTTACAATAAAAATATCATTCTATTGGAAAATCTAGTATTCCCGTACATGTTCAAACAACGGAGTACATTTACTCTAAATTATACAAATATGCCATACCCTTGAGATTACACACAAGCAGTTGATTGGTATAACGATCAAAATACAGAGCACAAGGTTTGTCTAGTTTATCTTTATTTTGGAGTATCTGTTTTGCGCGGGTTCCATTAGGTGATATGATGGTCACATTGTTTGAACCTTCAGATACAACAAACACATTTCCACTGTTATCAACAGAAATACCTCTTGGTGTTTTCATATTTACATCATCCTTGT…	0.0002908	Q03601	RecName: Full=RING finger protein nhl-1
LYa_b1_contig_3865 (292..1103) consensus	15.9862	0	GTCAAATTTCAATTTAAAGAATTAACATATTCTTGTTAAACCATGCATGCATATAACTTATACAAGTTATATTTTGGGAATACAAACACGAACTGATTTTGCATTATTTAGATTATTTGTAGATGCTTTATGATAGCTCAATCCTATAAATTCTTTCGATTTTGTTTTATTTGAGTCTTGAGAACATGCACGCAGCTATCGATGCTCCACATACCGCAGAACCAACTGCTGGATAGCATGGTGTTACTCTGCCACCACAATCAACCAAGCAATTTACACAGAAAGTTGCACACGTTGACATTTTAAAATATGATCCAATTTCTGATGGACAAAAAATACATTTGGCCATGAATTCCTCTGCTTGATGTGACATGGCTTTTCCAGTTTTACAAAATGTGG…	0.0002446	Q9JI60	RecName: Full=Lecithin retinol acyltransferase; AltName: Full=Phosphatidylcholine--retinol O-acyltransferase; AltName: Full=Phosphatidylcholine-retinol-O-acyltransferase
LYa_b1_contig_65380 (445..987) consensus	15.9427	0	GTGCCCAGCATGAGCAGAACAATTACAATCATAGTTTTTTTTATGTTCAGTGGACTGTGAAATTGGGGTAAAAAATCTAATTTGGCATTTAAATTTAGAAAGATCTTATCATAGGGAACATGTGTAATACGTTTCAAGTTGTTTGAACTTCAACTTCATTAAAAACTACCTTGACCAAAAACTTTAACCTGAAACTTACACTATCATTTTCTATGTTCACTGGACTGTGCAAGTGGGGTCAAAACTCTATTTTGGTATTAAAATAAGAAAGATCATATCTTAGGGAACATGTGTACTAAGTTTGAAGTTGATTGGACTTCAACTTCATCAAAAACTACCTTGACCAAAAACTTTAACCTGAAACAGGACGAATGGACGGACGGACGAACGAAATAATGA…	2.99914	Q8LPF1	RecName: Full=Pentatricopeptide repeat-containing protein At5g15980, mitochondrial; Flags: Precursor
LYa_b1_contig_159360 (1..270) consensus	15.9309	0	ATTTTAAATTCAATGGCAACATCTGTTTTGCCGGAATTAACTTGGGCTTGATAATTTATTGTAGAGCCATCGTAGTTATTCTTTGCTACTGTGCACATTGAGTGCGAGGGGCCCAATTTTGTGAGATAAGTGCCATCACCTTTAACTGCATCTCCATTTTTTATTTCCGATTGCAAAATTTTTCCAGATTCCATAATTTTCATCATTGATTCCTCGTCAGTGTGATGGAAATATGTGTCCATTGTTCTGGTAAGGTTGCTGACAAATTAT	0.304258	A5N7Q8	RecName: Full=Imidazoleglycerol-phosphate dehydratase; Short=IGPD >gi|254801919|sp|B9E169.1|HIS7_CLOK1 RecName: Full=Imidazoleglycerol-phosphate dehydratase; Short=IGPD
LYa_b1_contig_24915 (1..404) consensus	15.7883	0	TGACTTGAACTACATGCTGTGACACTGTTGCTTTCTCCCTCATTTGGAAAGGTTCCATTTAGCCATATCGGGAAGGAAGTACCACATGTCATTCCGTTGATCGGACATTCAGTTGGCATTCGATCTCCTGCTAGAGAAGTAGGCCTATACCACCCTGCCTCAAGTGTGCTATCACAGATGTAAGCATGCTCAGTATACTTCACGGATCTTCTATAGTCATCAAGTTCCTTATAATTCATTTCCAAACACGGGTCAAATTTACAACCCGGTGTATAACCTGTTGGTGAAGTGTGACCTTCGGGACATGGAAGCTCTTCACCAAAACAGTATCCGGATGCACATCCTATTGTAGAACTCAAGTTGTATACGTAAAAGCTCCCACAGTTCTTAATTCCAATG…	1.245e-09	P48733	RecName: Full=Uromodulin; AltName: Full=Tamm-Horsfall urinary glycoprotein; Short=THP; Contains: RecName: Full=Uromodulin, secreted form; Flags: Precursor
LYa_b1_contig_103320 (1..763) consensus	15.693	0	TGTCTGTAATAGGTCCTACAGAATCTGCCAGTTTATGTGTAGTATAAGTGTACACATGTGACACATTTACTTCTGCATTATCCCGTATAGCTGATGGTTCTATTGAATCACTATTAGGTTGATCTTGCTCAAAATTTTCTAACTCGTTGAATTCATTTCTTGCATTGTAAGTTTTCATTTTCCGTCTCCTTTTCATACTGGCCATGTATCTAGTATATCTTTTCCTCTCGTTATCGAATGGCATAATTTTGATAATCCCTTCCTCTGGATCTTCTGGCTTATCACTAGAATATGTAGAAATAATTTGGTCCCTTGTCACTTCATTTATTCTTCGTCCTGGGGGTAAAGTCCATAACACTCCATCTTCTACATGATCACCTTTGACCTGAATCTGCCAGT…	6.17391	Q9XV66	RecName: Full=Protein unc-80; AltName: Full=Uncoordinated protein 80
LYa_b1_contig_32510 (425..2274) consensus	15.5461	0	GTCCTTCCATAATATTTTAAAATAAATCAGATTGAATAAGTCATTAACAAACAACTAAATAAGAGTAAAGCTGGCATTGTATTTTTTGTTGGAACTTTTTTCTGTTACCTCTAACTTTAGCTCCGTATTGCCAAATATAATGTCAACATCTATTGTATGGATACGTGAAAGATCTGGTATATCGATGATAACTTTGCCAAGTAATGTGCATCCTTCATCATCGGTATATATTGGCTGATCTTCTTCTGTTGTAAAAAGTTTGACACCTAACGTTTTGAAATTTAATCTAGAGTCGTACGTTCTAGTTATCTTTGTCCCTGATGGTACAAGGGTATTTCTAATCATAATGATATCAAACCAATTCTTACATCGTTTCTCGCCATTCATAACTTCACCGTG…	2.19e-105	Q96MM6	RecName: Full=Heat shock 70 kDa protein 12B
LYa_b1_contig_120464 (229..523) consensus	15.2792	0	GTGTTATTGAAGATACAGAACAACCAATATGAAGTAAGTAGTATCAAAGTTCCATGTTAATGCGTAATTTCTGGTTATCCAGAATGCGATGTATTTTGCTAATGGGAGAAATTCTGTAACGCATTCAGCTAATCTGTTGGCGTTTTTCAGAACCACATGTACAACAAAAACCCACTTTCGTCTCATGTTTAGTCCCATTTTTGTCTTTGACTACGAAAGTCTTTACACCTTTAGTTGGTGTATTTCTTTTGCATCTCATACAATAGAGAGCCATGTTATAATTGAATCTAAAACT	2.14552	Q39090	RecName: Full=Protein UNUSUAL FLORAL ORGANS; AltName: Full=F-box only protein 1; Short=AtFBX1
LYa_b1_contig_338642 (1..730) consensus	15.2024	0	GTGAAAACAACGACACCGATGTATGTTTCCCGTTTGATATACCTGCTGACGACAAAGATTTTACCCCTGGATGCAGAAGTTTTCAAAGAACTGAAAGATCCCCCGATGTAACAGACTATAGGGAACAGATCAACGATGTGACGTCATACATTGATTGCAGCCATGTATATGGTAGTTCTGATGCACAGTTAGCAACCCTTAGAGATACGACAGATTCATCAATTTTAAAAACTTCTCCTGGAGATAATTTACCTGAGAACGTAAATGGATTTTGCGTAAAGAAAGACCCGGTAGCAGATTTTTGCCAATTAACAGGAGATTCAAGGACTGACCAAGCACCTAGTCTCCAATTAAACCATCTGGTTCTTGTAAGAGAACATAACAGGATCGCTACATTAC…	5.288e-38	Q9VEG6	RecName: Full=Chorion peroxidase; AltName: Full=Peroxinectin-related protein; Short=Dpxt; Flags: Precursor
LYa_b1_contig_300307 (1..351) consensus	15.0427	0	TCAATTTTATTAAATAATTAAAAAAATATTCTTGGTATAATTCAAGAACATGCTGTTCAAATAATCATCCATTTCATCATGTCTAAATCCAGCAAGTCATCCACTATTTGCAATATCCGTAAACACATCTATAAGAACAACATCTCGAGCGAGATTGACATCTGTTTCCATAACTGAGGCAGACTCTAGGAGCGCGGCGTCTCTCTCGGCTTAAAAGGCGATTTCCAAGCGTTTCTTCATTTGCTATGCTAGTTCCAACGAAGGCTAACATCAGACAAAGAACGATACAAACAGAAATCTTCATGACTCTTGTTGACTGAAAGATATGGTTTACTATGCTAGGAAACTGAC	7.54128	P12746	RecName: Full=Transcriptional activator protein LuxR
LYa_b1_contig_1847 (49..532) consensus	14.9042	0	AAAAAATCAAGATGCAAATCATATCATTTTTCACACACAAAATGTCTATTCTTGCTGCACCCTACATCATCCATTTTTGAATCACCACGGTACACTTGTGCACAATCCTGGTTATTGGCATTATTGGGTTCTCCTGGAGACCATCTAAAGTAAGTTTGAAACTTGTATGAACTAGCTTGCACCCAATTTCCTTCTGAAAAGATATCTGTCAATCCAATGTAGAAATCGGGAAAATTTCGTGCTCTTGCAAGGCCTACCACTGTCTGGTACTCATAAGGTCCATCTATTTCAACAAGAGCTCCCCCAAGTCGTTTACAGAAATACATTGCTGCAAAAAAGTTAGTTGAGAATCGACTGAAGTAATAACATCTACTATTTTCATGGTCCCAACCATTTCCA…	7.813e-14	Q91ZW9	RecName: Full=CD209 antigen-like protein C; AltName: Full=DC-SIGN-related protein 2; Short=DC-SIGNR2; AltName: CD_antigen=CD209
LYa_b1_contig_25245 (1..442) consensus	14.8617	0	TTGTTGTAGTTTCATGATTTCACGTGTGTATGCCCCAGGACCATCTCCGAAACTCCCCACTGTTTTGTCTTTGAGAAAGGAGGACAGGTGAGGAATAAATATTTTGTCTGTAAGATGTTGGCCACTGTTTTCAGTGCTAGCATCTTTGCACCACCCTCCATGCTTACTCGTTGTCTTTTTTTTTTCTTTTGACATCTCACACTCCATTTTCCCAATTGCTCTCCTAGCAATGTTCAGTTCGTATGAGAGTTGGTTTCTGATAATGACAAATGTATCGATGATTTCACTATCCATGTTATCATTGAAAGTAGCCTCCAGTTTTTTATCAGATAAAAAAGTTTCCAATTTGATTGATATAACTTGAAGTGTCCAAATGGTTACAATTATTGCTAAGACGGC…	6.04036	Q9SRD0	RecName: Full=Putative F-box protein At1g76830
LYa_b1_contig_165743 (1..327) consensus	14.8161	0	GGTCCTAATTCATCTGCCATTAGTGTGTTGCTTATCAGTCTAGGGCTTGGTAAAGAACTTGGAAATCCACCTCTTGGACTATTATCATCATCGTAATCAATCATGAGATCACTGTTATATTCAAACCGTCTTTGTGCCGTATTTGCTTTTCCCCATGATGGGTACACCAGGTTGTTACAAGATCCGTCATACGTCCTATATTTGGCATTAGTGGAACAGGATGCTTGCACTTGAAAAATAACGTTGCAAAACAGCCACGAAAGCACAAGAAAGGTCAAACTCGCCATTATTTGAGTTGCAATGTCAAATGTGTGTGTCACATTAAAC	6.168e-09	Q92626	RecName: Full=Peroxidasin homolog; AltName: Full=Melanoma-associated antigen MG50; AltName: Full=Vascular peroxidase 1; AltName: Full=p53-responsive gene 2 protein; Flags: Precursor
LYa_b1_contig_33976 (4..363) consensus	14.77	0	CAGCGTGATAATACATGTTTATGATTTTTTTTCATTCTACTTGACCCAATTTCTTAATGTTTTACAATGTTACAATCATACCAAAATAAATTCACATCATTCAATCATCATATCCCCCCTCTTCATAAACAAGTAGTGTGTATGGCCTGACTGGATGACCCATGATAGGTGAATTACAACATGTTGGTTTTAATGCATTAATTTGCTATGTTATCAGAAGGAAAAAGTTCAAAAATAAAAGAAAGTAATAATAAACCATTGTTTTGTATGGTTTACTGAAATTAAGTCTTCAGTAGTTGACTCTTCAATTGAATATTGCTACTAGATGTAGTAACGGTAAAAAGCAACAAATAACACAAA	0	not available	not available
LYa_b1_contig_65647 (43..741) consensus	14.691	0	CTGACCTAAATATTCTCTCCTCTTTAGAGAACCGAGTAGGTGAAACAACGGCCTCATTTGAGTTTTTTTCACCGAAATTTGAACTCTTTATTTAAAGTGTCTGTTGATGTCTGTTTATAAACTTAGATAAAACAGAATAAAAAACTTTTCGTTTCCGAATGACGTCACAATAAATATATTTTTTGGGGGGTGAAAAATAGATTTTTGTTATTGATTTATGTAGATTTAGGTCCCGAAAACATATATCACAAGCAAGAAACAACTAAACAAATAATTATAAGTAATTTACAATAATGGTTGTCTAAATGAAAAATAACTTGTATGTAAACAATTCGAATGGTACTAGCACGTGCTCAATATTTCCCTGCTACTTTTTTTGTAGAAAAATGAGTGCCATCT…	0	not available	not available
LYa_b1_contig_18411 (1..429) consensus	14.5282	0	CCCAGAGTTTAGCTACCTTAGATGAATCCTCAATTTTGAAGATGCCTCTTTGTCTATCTACCCATTTGATACATGAGTTATATCGGTCAGGTCGAAGTAGGAGATCTTTCAAAAACTGCCAAAGATGAATAGTTTGTTTGTGGTGTTGTACTTCTACTGGGGAACTTAATGGCGGAGACTGACTGTAGGACATATATTCCTCGTCGTGACAAGATGGTGGGATGTAGGATACGTTAGAGGAACTAGTAGTACTATCAATACTATCTTCACTTGGTGCTGGTGATGTACTGTTAGGCATGTAACTCATCAGGTCATAGCTATTGTCATAGTAGTCTCGGTAGGAATAACATTGAAGTTGGTGTTGTGGCGGAGATGGAGGACAGTCCTCGGTCTGTAAAC…	5.126e-14	O95238	RecName: Full=SAM pointed domain-containing Ets transcription factor; AltName: Full=Prostate epithelium-specific Ets transcription factor; Short=Prostate-specific Ets; AltName: Full=Prostate-derived Ets factor
LYa_b1_contig_27507 (1..1222) consensus	13.9166	0	GTGTAAATTCCAGACCAGTACAGATTGGTTGAGCAAAAATCAGTACAGTCGAGTACAGATATAGGCCATTTCAGACACATACTAGTTTTTAATGTTATTGTTAGCTGCATTGTCGGACTTTACGGTCAAACAACGTTTAACGAGTACAGGATTTTTCCTCTAATTTTCGAAATGATGCATTTCTCTATTTCTTTTGATGTCTTAATTAGTTTGTTAATTTTAACACACACAATTAGCATATGTAGGTCACCATACTTATAGTTTGAATGTTTAAACTTGGTTGCATTTAAATTCATTATGTTTAAGTTATACCAAGCCATTAATACTTTCCAGATGCAACATTGTGTGTGTACACAGTGTAAATATTTTGCAAGCTATAAAACCTGGTAGATCCACCAT…	2.99375	P31674	RecName: Full=40S ribosomal protein S15
LYa_b1_contig_296132 (1..1105) consensus	13.8295	0	TAAAGAAAACAAAAATCAATTTACGCAGATACGTACGTATGGATAAACGTACAGACTTACGAGTGTTTACCATAATGTCCCTTTAATTAAACAGCTGGAGCATTGTACAACAGTTATTTTGAATTAAAGATTTATCTGAAGGTTTTTTTTCAGTCATTTGTTTCTTTCACAAGTCAACAAAAGAAAAAGAAAAGATAACTGCAAATGCGTTCGATGGTCAGTTTTGTATATGTTGAAGAACAAGAAATGTTGGAAAAGAAGAACATTAGTCTTTTTGTGCTTGACTTAAGTGCCCCCGAAGAACTGTTTTAGCGTCGTTGTTTGGTTTTAATCTTTAAACAATAATTTTCCAGTCTCTTCATTTCTTTCGCTGGCTTTGTTTTCAGTTTACATTTCAAA…	0	not available	not available
LYa_b1_contig_81037 (9..909) consensus	13.5025	0	GTTTGTTCCCTTTCTAAATCATCAAGCTTAGTAAAGGTAATGATGGCAAATTTCCCCATCCCATCTCCAAATAGGTCAAAAAGGCGGTTGAACGTTTCTATTTCTTCGTCCGTGAATCTTGCTATCTGAATAACAAGGAGGAATGCATGCGGACCTGGTGTAGACATGTTTACACATCTTATAATCTCCTTTGATATCTGTTCAAAAGGGACCTGCGTATCAAATAGACCAGGTGTATCAACAAGCACTATTTTTCTTCCTGCCATGTTGCATTCTCCTCTTTTGCATTCACGAGTGACTGACCCTCCTGCTAATTTAGATTCAAAATGATCCGCTTTTGCCATGATTGTATTTCCGGTTGCGCTCTTTCCAGATCCAGTCCTGCCAACAATGACAAAC…	2.928e-36	Q9NUV9	RecName: Full=GTPase IMAP family member 4; AltName: Full=Immunity-associated nucleotide 1 protein; Short=IAN-1; Short=hIAN1; AltName: Full=Immunity-associated protein 4
LYa_b1_contig_9913 (878..3232) consensus	13.377	0	TTTTCTATAATATCTAATCATTAACAGTTTCTGAAGCCTTTGAATACTTGGAATAAATCTAAGTGCTCTTAGAATAGATTCCTCTTCAAGAAAGATACTCAATACTGGACATTGTTGCTGACTTGAGTTGAGCATCTGTGTTAAATGATCAACAGAAATACGGGCTCTGTAACACCAAACTGCTGGAATGTCCTGTAGCTGTGCTATGTCAATCATTTCTGATGGAATGTCAGTTTCATATAATAACTGGAGCAATGGATCAGACCCAAGTCTTTTGTCAAGTAAGATGTCATTATTACACTTCTTTAATTCTTTATCCAATCTCTTGAGAACAGGGGTAAAGTATCTTTTAGCAAATTCTTGCTCCCATTTTAATCTGGCATCATTTTGGGTAAGCTG…	1.424e-84	E9Q555	RecName: Full=E3 ubiquitin-protein ligase RNF213; AltName: Full=Mysterin; AltName: Full=RING finger protein 213; AltName: Full=RING-type E3 ubiquitin transferase RNF213
LYa_b1_contig_45192 (218..727) consensus	13.3058	0	GTCTAAGAATAGGATCTTGAGGGTAAACTTTTTTTTCTAATAGACACAATACTATTTTCAACCTGATCTGCTGATCAAAGAAATCAATACGAGAGAGGTATGGCCAATTTCTCCTGAATTTGATCTAAAAGATTGTATTAAAGGACGTCTTCAACCAGAACAAATTGTTTGCTTCGCCATACAGCACACTTTCATCAAAATGTGGGTTTGGTTAAGAATGTCCTTTTTATTATTTTTTGATAAATTTAGGGGAAATTAACTCTTCGAGTTTTCCTTAGAGGACGACCACTTGATTGTCTTGGGGGCAGGGCGGTTTTATCACACGGACTATTAATTTTCAACTGTTTCTTTGCCCTTCACGCGGCAGTGCCATTATATTTTTTTTCAATTTCGCAAAAA…	5.46371	P59960	RecName: Full=Protein DipZ >gi|618730349|sp|P9WG62.1|DIPZ_MYCTO RecName: Full=Protein DipZ
LYa_b1_contig_28228 (94..395) consensus	13.1321	0	CAACAATTTACACAAATAGCAATTTTGTTTTCAAAGAAAGTATTATGGAACAAATAACGTGAAGCCATGTGATACTTTATACATTTAACTAAGTCCTCTGCCCAAGCGCAATCAATACCAACGATTTAAAGTCCCATAGTTGTTAGTTCTCTTTGCTCCTGACAAACGGCACATGCTGGACAACATGTAACGGACATGCAGTCGGAAAACATATCACCCCTTATTCCTCCAAGAGTCCTTATTCTGGTCCTGTAAGTAATGTCTGCAGCCGGTACAAAACAAAGTGTGAACCAATTTTCTCC	0.306035	Q9M815	RecName: Full=Protein PLANT CADMIUM RESISTANCE 8; Short=AtPCR8
LYa_b1_contig_15889 (127..817) consensus	13.0405	0	GTGATGTTATGTAAAGCCATGTTATAATTTAAAAAAGATATATTGAATTTTCTTTTATTTACACTTACTAAAGAATAATAAACAGTGTTTCACAAATATCCAATTTTTCACTTCAATCCGTTTTGCGTCCTTTGTGTGGTCAGTTAATTTTCACAAAGGCAAATTGAATACCAGATTAATAGTAACTGTTCTCGCATTTCGTAATGTTTAATCTCTTCTTGGGATAATGACAATTTTACCGTCATTCAAACTCTTTTCAAAAGCTTTATAAACAATTTCCCCTCGAACTTCTCCTATTGGGGGAAGAAACACTCCTGCTAATGACGTGCGATCTTTAGCACTAGTCTTTGTTACATTTCTTTGAATGTGGTAATTTGCATATTCTCTTCCATTATATAC…	0	not available	not available
LYa_b1_contig_75803 (3..1864) consensus	12.8034	0	TTGTGTAGACGGAAACAATCGCTGTAATAAATGCAAAAAAAAAAATGTGTCAAAATAATTAATGAAAGCTTAAATTTTACTTTTCATAGTCAAATGTGTAATTCTCATAGCATGTTAAGTTTGATATATTTATAGTAGTTATTGACTCTATAGTTGTTTACATCTACATCATTTTGGACTATAGTAGATAGTTATACTTATCCCATTTGCATTCATACCACTCCTATGTACATAAAAGCATTATGTAGATTATGATGCGAGTTTTTCTCATGCAAAATCTTGAAACAGAAAAGTTTTGAGTAAAAATGAAACAAAAATATTGTTTTAACTGAAAATTTCACGAATGCGTCGCCCCCTGCAATCAAATGCTCTTTAAAATTAATTATCAAAATGTTAGAC…	0	not available	not available
LYa_b1_contig_32663 (1..423) consensus	12.5011	0	CCATAAGAGTTAGGTTCCCCTGAACGCCAGTTGAAATAAGTTTGTCTCTCCTGAGATGTCGCTTTTTGCCAAGCGCCTTCCGAGTACATGTCCGTTATGCCAAGCCAACATGGTGGAAACCTTCTATTCCTAGCCATTCTGAGTAGTTTCTGATATTCCCAATAATTGTCAATTTCGACCAGTTTTCCACCAATCGTTTTGCAAAAACTCATTGCACTGTAGAAAGGTGCACTAAACCGACTGAAAAGGTAGCAGTTGCCTCCGTATCCGGGATGCCAACCAAGGTTACACTTGTGAAGTTCTGCATAGTCAAATAAGCAGAATACAAATATAAAAGCGGTAATCTTATAAACAAACACCATTCTTCTTTATGCTGTATGATTCACTGAAATCCTTGGC…	1.02e-09	P86854	RecName: Full=Perlucin-like protein; Flags: Precursor
LYa_b1_contig_326069 (1..207) consensus	12.479	0	TATACAATGAATTACTGCAAGCCAGCTTTATTTGTTGTATCTTTTGATTTATGCCTAGCTCTTCCAAGCCTACTCTGTGGCAATTTAACTTCGCGATTTTTCAAATTTACTTGATGTAGGTTGATTAAAATTATCAAAGTTTTATATACCTCGAGTTTTTGAGACGCTTAATATTATCTTTTATTTTCGTTTCGGGAAAGTAGCGAT	3.3874	A2SPE0	RecName: Full=GTP cyclohydrolase MptA; AltName: Full=GTP cyclohydrolase IV
LYa_b1_contig_66805 (966..1950) consensus	11.9838	0	TCAAAAACTAATGACATATCAACATCAACACTCTGAAATATGCAAACTGTTTTTCAACAAAGTTTTCAAAATAGAAACATGAGCTCATCTATACAACATAGAGAATTGTTGGTTTCATGTTTTCTTAAAGACAATTGCATGTTATTTGTTTTTAACTCAATGTACAAAAAATTGGAGACTGTATTATACCTTCTCTGAAAATTTATCATGCAATTGACCTTCATTTATGTTTTACATTTCGTCAAAAGGACACACAGTGTGGTTTATATAAGTCCAAACTTTCTTGTGTGTGTTCTTGCAAGGCATACAGATATTCAGTTTGCACGTATTACAATAGGCAATCGCTTGGTTGTGATTGATACAAAAACCGCATTGACGAAAAGCTTCCTCTTCGGCTCT…	0.61785	Q60MF5	RecName: Full=Probable RING finger protein 207 homolog
LYa_b1_contig_190453 (1..1083) consensus	11.967	0	GACATACATCACTTGAATTCATTTGAAGCAGACGTTCAAGATCACTCAAATGATTAAGCAAATCATTTACAAAGAATCTACTCGGATCAGCAGTGAATTTGTCCTCATTTAGTAAAGCATTGCTTGTTGTAAAGTTGAATCCCATTGATCCAATGACTACACTGTCTGTAAGAATACGGATTACCATGTGTTCAGCTGCTGTTACAACTGGTAGTGTTGTACAAGGTAGAAGCCCTATTGAAGAAACGCTTGGGTTTAATAAACAGGAATACCAAATGCTATTTTCATTAGCTTTTGTAGCTACCAAGCAGCACAGATGTAAAATTATAGAAACCGCTTGAATACAAGGACTCTCCGATGCCTCAGAAAGTACAAACAATTCATGTCCAAATTCTTCTC…	0.476535	Q62633	RecName: Full=Ileal sodium/bile acid cotransporter; AltName: Full=Apical sodium-dependent bile acid transporter; Short=ASBT; AltName: Full=Ileal Na(+)/bile acid cotransporter; AltName: Full=Ileal sodium-dependent bile acid transporter; Short=IBAT; Short=ISBT; AltName: Full=Na(+)-dependent ileal bile acid transporter; AltName: Full=Sodium/taurocholate-cotransporting polypeptide, ileal; AltName: Fu…
LYa_b1_contig_22249 (41..1748) consensus	11.9026	0	ATAAAATAACAAACTATATATGATACATATTTTGTTTTGAATGTGTGGAAATAAATAACAATAAAAAAGTAGGGTTTCCTCAGCAGGAGGACAGACTCTCACTTTCTATGCATGTTTTCCATCGCAACAACATTTTCCGATGAAAATAAAGGATTAAATTTAATGATTTTAACATTTTAAGTCCAATAATGTGGTAATGCTTTCATTTTGTTTGTTAATAGTTTTACATGACATGATGTACAGAAATTCATTACCAATATCTCTGACATGAAAAAAATCTATCCGATCTCGATATAGTTTGCCACCTTCCTTTCTCGACAAACAGATGATGGTTTTCGGATCTAATTCACACAAGTATATACAAAGCTGGTTTCTGTCTAGTTCTGATTTAACGTCATA…	8.32e-06	Q9NQS5	RecName: Full=G-protein coupled receptor 84; AltName: Full=Inflammation-related G-protein coupled receptor EX33
LYa_b1_contig_67217 (46..1474) consensus	11.8881	0	ACCAAAAACTTTAACCTGAAGCGAACGGACGTACAGACAGACGAATGGACGAACAAACGAACGCACGGACGAACGGAGGCACAGACCAGAAAACATAAGGCCCCTCTACTATCGTAGGTGGGGCATAAAAAAAAAACACAATTGCATGATGCTAATATTAATCACTTAAGTTGATATACATTTTACAATTGAAAACTTTGATTATCAATGTTTAGCGGTAGCGTTTCGTTTCTCCCTAAACATAGATTTGTTCGAATTGATATGTATATATAATAAAGGTAATAATTAAACTCATCATTGATACCAGGACTAAATTTTGTACATACGCCAGACGCGCGTTTCGTCTACAAAAAGACTCATCAGTAATACTAGAATCCAACAAAGTTAAAAAGGCCAAAT…	0	not available	not available
LYa_b1_contig_55244 (57..3552) consensus	11.6733	0	TGGCCCATGCAGTGTAGGAAAAAGTACTCTTGCTAGCGTGCTTATTGGTACAGAAATACCACAAACATGGAATTCTACAAATGGACTGGTTATATATTTTGGCAGGAATGGCATTGATATCGAAAAGAAAAAAATGGTTCCGCTTAAAGAAGGTGAAAGGATACATGATATTTTGGCAAAAATTCTTCGAGTGCAACCAGACGTTTCAGAGAGGTTAACACAAATTACTGGGCAGAAAACAACCACACATGCTTTTATGACCTCATTTGCAGTTGAAACAGATATAGTATCTAAATCATCGACAAAAGATTTACAACTACTTAAAAAAGCCACCAAATATTCAGAAAAGCTTGCAATTCAGACTTGTACATCAATCAACGAACATACAAGTGAGCAAAT…	1.539e-16	P42573	RecName: Full=Cell death protein 3; AltName: Full=Caspase ced-3; Contains: RecName: Full=Cell death protein 3 subunit p17; Contains: RecName: Full=Cell death protein 3 subunit p15; Contains: RecName: Full=Cell death protein 3 subunit p13; Flags: Precursor
LYa_b1_contig_138762 (6..2178) consensus	11.6454	0	TTTCACAACAACACTGACCGATTGAAAAAAAATGACGATTATACGAAATTTACACGAAAAAAATGATAAATTCGTGCACAGAAGACTAAGTTTATGATGTTTGTATGCATTGGTTCAAGAATTGGAAGAATATCTTTTTTCACGGGTCACTCGTTTCTTTTGACTTTAAGTCTAACCGTTAATCTTCTTCTTTTTTGAAGGTCGTACTGATTTTTATAATGTATGTGTTCATATTGGAATCCCTTATTTGAATTGATATAAATATATGAATGAAACGTGTTACTTATCAAAGCAAAGTCATACAGGTGAAGAAGATCTTGTGGCAATTTCGTAGAAATACCATTTTGAATATCTCAAAGAAGTCACAAATCCTTAACATCATCAAATCTTTCGTTTGTG…	0.0011	Q87VN8	RecName: Full=Curved DNA-binding protein
LYa_b1_contig_14368 (1..3160) consensus	11.6448	0	TTCCATATGAGTTGAAAGAGACGTATATATCGTATTAGGTCACTAGCAGACCGTGTAACGAAATTATCTACTGACTATCTTCACTTGTGGTATTTTGACTAGCGGCCTTGTTTGAAGTCAATACAGATAACAGTAACAACTTTTTAACTTTAATCTTGTTATAATTTTATATCAATTTTTTTTGATATTTCTGCCTTTTTGCAGAGTTATCTCCTATATCATTGTAAATCTCCATAGGAATCTTAAAATCATGATTTTTTAGTTTTCCTCAAGTTAAAATTGGTGCGATTTTTTCTGTGTATATCGGAGGTGTCACCAAACGGTGAAAGAGCATGGCCCAGAAAAGGCTAGGGCCAAAATCAAAATATGATTCCCTTGAATACGAAATTGATCGTCTTT…	0.0744642	D4AX50	RecName: Full=Subtilisin-like protease 8; Flags: Precursor
LYa_b1_contig_36244 (564..1062) consensus	11.6022	0	GAATATTTTTAAAGCATTTTCCCTGTTGGCCCTCTTATCAGCCCTAAGTTATTGTCCTCTTACTATTGGAGTCTGAGTGTGGCACCAGGGCCTGATTGTACTGATCTTTATACTGAAGCTATAATGAAGGGAATGAGACATTTTAATAAAAGGGTCAAAAGATCAACGGTAAAGGTTACTGGTAAATTTCAGAGGAAACAATGAAAAAAAAGTAGTATCCTGCTGGTACCATTGGTTTCCTTAAGCTTTACTTGATTTTGTTGAAATTACACAGATGGACAAGTTTGAAAAGCAAAATAGGCATAATGATAGTTAGGTACAAGGTCAAACTGACTATTTGGACATATGGGTTGATAAATGTAACGGTCTGGAATTTTTGTGGTATGATTAGAATAAAAC…	0	not available	not available
LYa_b1_contig_451525 (1..256) consensus	11.2854	0	TATTAAGTTCTGCTCATTTTCTGAATCTTTTTTAAGTAACGCGATTATATCAAGAGATGGTACTTTTAATGGCACAAATTTCGTTGGGTCTTGCAATGAGTGTCTGACCGGACCAAATGTCACTGTTCTCCGGATGCCATCTTTCTCATCCAATATTATTCCATCGGACAAAGTAAGTGCAAGAATGGTCATGAAAACGGATTTCCACGTGAACATGTTTTATGTAGAACCGTTTGGACCCTTTAAACACTATTTT	0.406957	Q06VC2	RecName: Full=Putative ATP-dependent RNA helicase
LYa_b1_contig_49439 (320..1058) consensus	11.2779	0	GTAGGTTTTGTTTATGCTACAGACAGTAAACAAACACAAATAACATACATATATACGCTTTTGATAAATAACATAAAATTGTATAAAAATGTATGCTGACTCAAAATACACAATAAACACTAAACAAATTCTCTAAAAATACTCTCTTAAACATCTGCAAAGAGTACACAATTTACCAACTCCACGTCGTCAATGCTGCATGACCTATCATATAAATATTTAGGCAAGAAATCTTTGGCATGTGTTTCTATGGTGTTGGCTTAGGCTGGTTTAATATCGGATTATATCCATGGAATTAATTCTTCATTGTCGTTCATTTGTTACGATTCTTTGACAACAAATCCCGTTCATAGTGCTTTTGCTATAAAGTAGCTATTCTATGCGAACTCATTTATATAT…	0	not available	not available
LYa_b1_contig_3418 (38..1275) consensus	11.1522	0	TATAAAAAAAAAACAACAACACAAAGACAAATCTAACAGCATGTTGTCACACATGTAAATCATAAATGTATGAAGAAAATAAAGCACTAAAAAAATCGAAAACTATAACAGATTAAGATACACATAATTAATCTGCTCTCTTCAAAAGTCACAAATGTTTAATTTCACGAATTACTGTTTGCGGTTATCGGCTTTGTCTTTCAAAACCTTCCTTAATGGCTTCTCATGTTGTGATGTGCTGTTGGGCATTTGAAGTTGTACTGCACGAGCTAAGAACAGTCGACGGATTGTTAAAAATAAAGAAACACATGATTCCATGATGTATGAAGAAAAATCATTGTTATCACACAAAATTTCCCAGTAATAATTTATCATATGTGCGGAAACTATAACTTCTTT…	0.35755	Q84H44	RecName: Full=Sulfoacetaldehyde acetyltransferase
LYa_b1_contig_1700 (36..381) consensus	10.9748	0	GTAATTGCAAGGGGAAATGTCACAAAAATGGTATATGCAAAAGAGGAAGATGTAGATGTAAAAGAGGATACACAGGAGATGGCATTAACGCTTGTTTCAAATCAGGATATATTGGTTGTTTTCGGGATGACAGCCGTAGAATATTACCTAGAGCATTAATGAGAGACAAAGGTATGACAGTTCAAAAATGCCGACAGTTTTGTGGTAAAAAAGGATTCAAGTTTGCAGGTGTTGAGTATGGATACGAATGCTTTTGTGGGAATGTTTTACGAAAATCCAGAAAAAGAAAAGAAAGTGATTGTAAAATGCCATGCTCAGGCAATAAACGTCAGACATGTGGTGGTCC	3.543e-14	D4AUF1	RecName: Full=WSC domain-containing protein ARB_07867; Flags: Precursor
LYa_b1_contig_5467 (83..1188) consensus	10.7497	0	AACAAGTGTATACAATCAAAATAAATTCGATTTTAATGACAGTTAATTAATTTGAATTGCATAAAAACAAATTTGTGCTGATATTTACAGAAAGTAAGCTTTGCATACGTTTTTAACTGGCAAATTTTTTGATATTTTGTTACTATTAAACTAACGATGTCTCGTATGAAAACTAATTGTAACTCAAAATGTTATTCGTCTATGATGATATCTGGATTTCCATCGTCATTGTTTTCGGTAAGAAGATCTAGTTGACCTTCGTATTTGTCATCATCGCCCGGATCATACGCAGATACACTCATTTCTGTATTTCCAAATGTAAAGACTACTTTAACATTTTGCAACTTCTCTGATGGTTTTGCAACCTTAATAATCGATCGTCCGAGGAAATGACATTCA…	5.65e-30	Q8K0U4	RecName: Full=Heat shock 70 kDa protein 12A
LYa_b1_contig_68693 (4..711) consensus	10.2385	0	GTAAAGAATCAAGAATATGAGGAAACAAATATTTTTTTTATAATTTTTGAGTGTTCTAATATCAATATATCCCCTTGTTTTGGGGTTCTTTTTAAAAACATACATAAATATTACCGCCCGGCTCGTGATTATTGGTACAATTGTTGACAGTTTTCCAATCTCGGTCTCGAACATTACTGTCGATGTTAAGAGACTTATTTCTAGTAGAATATCATACATATTGAAGACAGTATGCAGGTATATATCCTACAAGCAAGACCTCCCCGTGTGATTCAGCATATCTATTAAATTTTCTGATTATTTCTTCTTTCTTCAGAAATTCAAATGGTTTTCTGAGATTTCCTTCTGTGAGATCAATAATTTTGACATTAAAAGGTAAATTGTTGACATCAATTTCTA…	0.480282	Q8WP28	RecName: Full=Homeodomain-interacting protein kinase 4
LYa_b1_contig_8034 (342..792) consensus	9.96735	0	GCATTTTATTATTTTAAGTAAAGTTCAAGGTTTAATTCATTTTCTTAAAAAAGGTAAGTTATTTTCCCGATAACCTTCATTCTAAAACTAAAGGAAAATAATCATTGTAGAAACAATGCCTACATAGATTCTAAATCTGAATTTTAAAAATACGATATCAAATATAATACAGTATCTATATTCTAAATCAAGCAGTTCTATTTTTAAAGTTCAGCAGCATCAGCATTTCACTTCGCGGGTTGTTGAGATCAAAAGGGTTAGGACCGAATATACGCACAGCATCTGTAATCGTAGCGTATTTTACCACGAGATGGACGGACAAGTTTAAAGCTATTCACGAAGTATCCAAGGTGACAGGTCACTTGGTGTCTATCAAGATATACAAAATTCTTTCCACCA…	3.21068	Q75AV6	RecName: Full=Restriction of telomere capping protein 1
LYa_b1_contig_442285 (5..680) consensus	9.9431	0	GTGTTCTCTGACCCATATGGTGTGAAGGGAACTGAGGGCAGGTTGTGTATTGGCCCTCACATCACCTGCTCTAAAACATGCATTACTCGTATCCGAGGTACAACTAGGATCATCGAAGTTAAGCGGCAACTTATCATCCGACGAAACCAACATCATTCCATTGTCAGTAGGGTCTTTCAATGCATTTAACTCTGCAGCAGTAGAACCATATACACCAGAACCATCGATATAATGTGTCAGTTCATTAAACTGTTCCCGATAACCAAAATTACAACCAAGGTCAGATGCCGCTTGAGACCTGACAAAATTCATGCATCTCCTATTGTTTCTGAGTGTATCCCGATGGTAAGGATCATCACCAGGTATAGTGAACGTGAAACAATCTGGATTCCTGGGATT…	9.388e-32	A4IGL7	RecName: Full=Peroxidasin; Flags: Precursor
LYa_b1_contig_261708 (10..727) consensus	9.90142	0	CATAATAATGAAAGGCAATTGCTGTTGGTCTTTTCCATTCGCAACCAACATGTGTGAAGAAACCATTTGGTTTATTTGCTGGGATAAAACCTCTATTGGCAAGTAAGAATTTCTGGAAATTATACTTTGTTGGGGTTTTCTTGAATGTTAAAGTTATATTAGCCGGTGATGCAGGCTCTGTTAATGGTTCGAAGAGATGCATCATAACTATCAAGAAATATTTCTTTCCATTTCCACCAATCTTTGCTGATACATCTTTGGGAAGAGCGTAGAGAGGTTTATCTACCGACTGGAAATTGTCTGTACCACTAAACTCAACAGCATCACCTTTACATGCGAGTCCTCTTTTACAATCCCAAGTAGCATCTTCAAGGTGTGGTTCTAAGCACAGACCGGAGT…	3.684e-06	Q95XM2	RecName: Full=Probable peptidylglycine alpha-hydroxylating monooxygenase 1; Short=PHM; Flags: Precursor
LYa_b1_contig_42364 (234..1343) consensus	9.88812	0	TTTTCATCTGTAAAGCTGCACCAGTATAGGTTATTGTCACTATCATAAATTGTTAGATTGTTGAAGAATATTTTGTCACCAGAAGCATGTATCCATCTTGGTATGCAGTCTGTTTCTATTGTCTGTATTGTCTCTCCTGTCTGAGGATCAACAATCAGTAGTCCATCTACACCACCTACTACTAACTTATTGTTTATCATTGTAATACCACCATCATAAAACATTCCAGGTACTGATATGGATTTGAGTTTATGTTTATTGTTTATATCATACATCTCTATACAATGACATTTGAGGGGGTTACCAACAGTTACAGCCACTGTAGAGTTGTTGACAGCTGTAACACAACATGGACTACCCTGGACTGGTATACTGTCTAACTTTTCATCTGTGTTACAG…	4.27805	A2R065	RecName: Full=Assembly factor cbp4; AltName: Full=Cytochrome b mRNA-processing protein 4
LYa_b1_contig_6638 (1..421) consensus	9.7858	0	GCTAACGTTATGCTGTAAGCTGTTGCACAGGACTCTAGTTGTTGAGTAGAGCAATTCTGCGCTCCAGTTTCACAACCAGACTGGTAAAGAGTCATGTTTGCATTCGCAATGGCCGCATGAACTGCATTTGAATTGCAGTGAGACGAATATGTTAGCAAACATTCCATGTAGGTATTTATTACACTGCACATTGCCTCCTTGTTTCGTGGTGACTCTCTTATTGCATTGGCGTATGCTGTGGTACAGGACGTGATTTGTTTAGTAGAACAATTCTGCGTTTCAATTTCACAACCAGACTGGTATAAACTCGTGTTTGCATTAGCAATGGCCGCATGAACTGCATTCGAATTGCAGTAAGACGAATATGTTAGCAAACATTCCATATAGGTATTTATCACA…	2.82577	Q9FHN9	RecName: Full=U-box domain-containing protein 31; AltName: Full=Plant U-box protein 31; AltName: Full=RING-type E3 ubiquitin transferase PUB31
LYa_b1_contig_100704 (37..1431) consensus	9.75007	0	AACAGTTTTAAATTATGACCATATCAATGATAATTCATGTCAACACAGAAGTGCTGACTACTGGGCTGATTATACCCTCGGGGGAATGAAAACTCCACCAACAGTGGCATCGACCAAGTGGTTGTAAATACACTCATCATAAAAACCAGTATAGGTATTTAAAATAGAGGCGAAAGATACAAAAGGGATATTAAATATATACAGTCGAAATAAAATGGACAAAGTAATTGAAAAATACGATAAACGACAAAAAGACGAAACATTTCACACAAAATTTAAACACAAAAACTAAGGACTGAGCAACATGACCCCAATCAAAAACTGAAAAATTATCTAAGGTGCTAAACAAGAGTATAAAGACCATTATCCACATGGAGCACTGGTTGTGTTATTCAAGGA…	0	not available	not available
LYa_b1_contig_34952 (1..1616) consensus	9.63666	0	AGAAATGTCTGAATGTGAATTTGTGCAAACCATTTTACTGTTTATTTATTTAATGTCAACCTGTATCACCTGGTAAAAGAAAGTGTATGTCAAAATAATGCTATACAAAAAGCCTATTCAAATTTATAATTTGTACAAAATTATAACTTGTAAGCAACATATACCAAGAGGCCATGTTATCAATACTACTGTGAATTCATTTATTTTCGTGGGTACCAATTTTCTTGGATGAAGCAAAACTCAATACTTATGTTCTCGGACATTTAATTTTGTGGTTTTGACAAAGTTTTCATACAAGCCTATAGAAAATTTGTCATTCGTTAGACATTTAATTTCGTGGTGCACCTATACCCAGGAAATCCACGAAAAATTGGTATCCAACGAATAATTGTGAATCCA…	1.93343	O60271	RecName: Full=C-Jun-amino-terminal kinase-interacting protein 4; Short=JIP-4; Short=JNK-interacting protein 4; AltName: Full=Cancer/testis antigen 89; Short=CT89; AltName: Full=Human lung cancer oncogene 6 protein; Short=HLC-6; AltName: Full=JNK-associated leucine-zipper protein; Short=JLP; AltName: Full=Mitogen-activated protein kinase 8-interacting protein 4; AltName: Full=Proliferation-inducin…
LYa_b1_contig_7746 (107..2494) consensus	9.58625	0	GGATACTAAGTTACAAGCCGTAAACTAAATAAATTGTTCCAGCAAATATGCAATAAAGATATTATTACATTAAAAAAAAAGTATTTGTCACTACCTTGAAAACGTATTTCAAATTGTGTACTAAACACAACCTCCTGTTTATAATCTAATATTCCGAATAAAAAGTCTGACCTGGCTCGGTGTGCCCTATGCTAGAAGCCCGGCTAATTACAGTTCTGTAAAAAAAAATTACCTTTTTATAAGCCTTCCACGAGTATTGCCAGAGAATAATACACACATCGTATTAATCTAGTTATAGCATAGATAGTTCAAGGTCAATATTCGTCTTTACAATTTAAGTTATATCGGCGTGTTTTCGATAAAAACGTGATATCTTGTCCCAGCCACTTTAAAAAAATA…	0	not available	not available
LYa_b1_contig_125363 (1083..1362) consensus	9.56372	0	GAACCTTTTACTCATATGTTAAAAAAGATATTATTTTGTGGACAATAAAGGAAAAAAGATTTAAAAAAAAGAATCGCTGAACCTAAACTATGGCCCAAACTAAAGGATATGAAATGAACTCTCCTCCACAACAGTCGAGTCAGTTTCAGGCCCCACAACAGCAACAACATACCACTGTGATCATTAACCAACCAAGTGCTCCGACTAATCCATTACTTGTTGGTACTGTACAAGGAACCAGAGAGTGGTCAAGTGGACTCTTAGATTGTTCTGAAGATAT	1.97901	D9HP26	RecName: Full=Cell number regulator 10; AltName: Full=ZmCNR10
LYa_b1_contig_51521 (1..515) consensus	9.50667	0	GAAACAGAAAGATTGGTTATTCGAAATACTTCCAAACGGAAACACTCAGATTCTGTTGATGATAATGAAAATACAAAGAAGCAAAAGATAGATCCTCAGAATGATAAGGCGGAAGATAACATTAAATACAAAGTTGAAAATCAGAAGGAGTTGGTGTTGCAGTTAGAGAATGATGTCAGTCCCGTAAATAAAGAAGAGAACATAAAACCAACACATTCAGAATTAGATGAAATTAAAATCGCTCATTTGAAAGAAAACATCGCTTCTAGTATCGATGAACAGAATGAACTGAAATCAAATTTAACTACTTCTCAAATTGAAAACGCAGAAAAGCCAACCGATTTTGATAACCAAATTATTTCTAAAAATGACGATAGCCAATTTGAGCAGAGTGAATTT…	4.86023	Q5HPA2	RecName: Full=Extracellular matrix-binding protein ebh; AltName: Full=ECM-binding protein homolog
LYa_b1_contig_1220 (48..868) consensus	9.39711	0	GAACTCTTTCTAGTTAATGACAATCTTGAACATAGTAACATACACATAGGTTGCTAACATCACAAACAATGTATGAAATACAATTAAATATATAATTGACAATTTATGTTTTTTTCCCTCTAAGTGATTTCTTCTATCTATCATTTTTTTGGTGTTATTCCCATATGGTTTCATTTTGAAATATGCATTCACACTAAAGGTTCAAAGAATAATTGAATAAGTTTATAAATCTTTCTCGTTCTCTTTAAAAGAACAAGGCAGCTTTGTTCAGTACAAATTGAATGTATCCCCCAGATGTCAGCTGAACTGTGTCATTCTATGAAAATCAACTATAAACATACTATTGGAGTTGACAGCTTCTGGTCTGCTACTTTTTATTTTTTTAGGGCATTGAACTGG…	1.46286	Q9MZD1	RecName: Full=Sialin; AltName: Full=Membrane glycoprotein SP55; AltName: Full=Sodium/sialic acid cotransporter; AltName: Full=Solute carrier family 17 member 5
LYa_b1_contig_795 (1..395) consensus	9.11244	0	GAAATTATGTATTTAAACATTTGCTAAAGTGCTTCGTTCAGTTATATGCCTTTGTTGGTGTCCTGTTTAAACAAACAGTTTTTCACAAATGTATCTGTATCTATTCCAGCATCTATCATCATTCCATTCAAAATCTTGTTGTTTGTGTATACTAATGCAATTCTCATTTCCACCTGCGTTATTCGGTTCTTTTACACGTCCGGTATGCCATCCAGTCACAATAAAATTACTTTGACTGGTCGCCCAGATCCATCTTCCTTCATGTTTACTATCTGTTCCGCCAAGCCAGAAAGTTTCTGCATAGTTAGATGCCTGTTTCCTTAAGAATTTTTTTTCCCTATTTGACACCACTTCTGCAAGCATACTATTTTTCTGTATGCATTTCCTCTTGGCGT	1.172e-12	P82596	RecName: Full=Perlucin
LYa_b1_contig_112100 (6..1277) consensus	8.93952	0	GCTATGCCAGCCGGATATCCATAAGCATCAAATTTCGTGTTTTCGCCGTAAACCCAAAGACCAAATCGTGCGCCACCTGTATGCATTATGTTATGTTTCCCTGGAGAAATTGATAAACTGAATGTACTATACCGATCAGCTCCGTTAGAAATACTATAAGCACCATCTATTGTAGTCAACTGACCATCAAGTGTAAATCCACTGAGAGCATTCGACTCTACACATAATGTTATATGACTTTTCAAATTATCAATTGCAGGTACTGCAAAATCATAACTCGACATGTACTGGTTCACGCCATGAATTGTCATCATGAAAACAGTACCTGTGCCGCTTGGAAGTTCATGTGGTATAATCATTACGAGAAAATCACGATTTCCATGGATATACGATATTTTG…	7.374e-07	Q9Y6R7	RecName: Full=IgGFc-binding protein; AltName: Full=Fcgamma-binding protein antigen; Short=FcgammaBP; Flags: Precursor
LYa_b1_contig_10004 (386..2331) consensus	8.85748	0	CAACTATGTACCCAATGTGTAAGAGTTCAAACAATGTAAACGATGTTGACACAAGATCGTGTTTCCATTTTGTAAACAATGTAAACACGATATCTTTACAATATTGTAAAGGTCACGATGTTAACAATGTCAACTATATGAATACTATGTTAGAGTTCAGACAATATAAACGATGTTATCGAATTGACATTGTTAATATAGCGATGTCGACAATATTAATATAACATTGTGAACTAGACATGGATGATACCACTGTCCTTATGTTTGGGTAGCGTACAGAGCTTGCAAACATCTTTACTGCGCCACATTCATAATGTGTTTGTGATAAATCAGGAACATTTATTTCATTGGTTGCAATGTGTCAAATTGTTTCGATTATATTATCCGATTATACCAGGC…	6.668e-10	Q8NCG5	RecName: Full=Carbohydrate sulfotransferase 4; AltName: Full=Galactose/N-acetylglucosamine/N-acetylglucosamine 6-O-sulfotransferase 3; Short=GST-3; AltName: Full=High endothelial cells N-acetylglucosamine 6-O-sulfotransferase; Short=HEC-GlcNAc6ST; AltName: Full=L-selectin ligand sulfotransferase; Short=LSST; AltName: Full=N-acetylglucosamine 6-O-sulfotransferase 2; Short=GlcNAc6ST-2; Short=Gn6st-2
LYa_b1_contig_86447 (1..907) consensus	8.68495	0	TTACATAGATGAATTATTTTTACAAAGAAATTAGTTTCTTTTTATATTTTGTTAAAATTATGGGCTAAAAGTAATTCCCACGATGTTCAATTCAACTGATTTTTTCATTATGAGTTACCGTTCCTGCGGATAGTGAGATTGCTGACTGAATTTAGAACCTTCCATTCCCTTTTCATTGTATTGTAGCTGCGGTAATCAGGACTAGATATTTTGTTAATCAATTCATATCCTGATATGAAGAATGGCGTGAAGTGTTTATTATGTTCCAATGAAATACTGAGCAGTTTTGCCAATATACCGATGTATGCATCTTCGATTCGAATTACTTTAGAAAATGGTATCCCTTCTCTTAGTGTTTTTATCACGTGCAAATTTGTGATCATTGTACCACCAATTATG…	5.48e-32	Q24157	RecName: Full=Beta-1,3-galactosyltransferase brn; AltName: Full=Brainiac protein; AltName: Full=Neurogenic secreted-signaling protein brn
LYa_b1_contig_217582 (15..3691) consensus	8.57986	0	GAAACTTAATATACTGTTACACGAAAGCTACAGAAGAATTGTTATAAAATTACTAAGCATTCGAAAAGAAAAAAAAATGAATGTCCCTCTGATATCTTTCGTCCCTCTTTTGACACAACACAAAAGTAAACGGTATGTTACATAAATTAGTATATTAAGCACTATGAAATAAGGTTAAGACTTAAACGTACAATTTGACTTATAACAAATTCTGAAACATTAAGACTGAAGTAATTACTCAAATTACTTAAGTAACTTTAATCCAGCAACGGAACATCTTTTCACTCTACAAGTTACTATTCATAGTTAAACATTTTTTAGGGTTTCTGTCATATCTTTCTGTTTGTTTTAAATAAATCGGTAAGGTCACGTTATGTTATCTAATAAAGCTAACAAGAA…	4.744e-100	Q3UQ28	RecName: Full=Peroxidasin homolog; Flags: Precursor
LYa_b1_contig_892 (1..263) consensus	8.50461	0	CTCGTTATGTAATATTCTAGTGCTGTCATCCTGATAACAACCAATATATCCTGATTCATCAACATCCTCTGGTGCTGTATAAATAGAGATCCTCCATGGACCACCACATGTCTGACGTTTATTGCCTGAGCATGGCGTTTTACAATCACTTTCTTTTCTTTTTCTGTCTTTTCGTAAATCATTCCCACAAAAGCATTCGTATCCATACTCAACACCTGCAAACTTGAATCCTTTTTTACCACAAAACTGTTTGCATTTTTGAA	1.063e-09	D4AUF1	RecName: Full=WSC domain-containing protein ARB_07867; Flags: Precursor
LYa_b1_contig_40105 (1..867) consensus	8.43827	0	GATCTTTGGAGATTAAAAGAAGACCCGGACATAACAGAAGATGTTGACATAAAAGAAAACGTTGACATAAAAGAAAAGAAACAACCATTATTATTACATGCGATAATAATAGGTGTAGTGATAGTATCATGTATAGCATTATCCATTAAAAACATGATGAGGCTAAACGAATACGACCGAGCGTTTGAACAATTAGACGAATTTACAAAGCACATCGATGGGTTGAATGAGATAAAAAGAGATGTTCCACGCTTTAAAGATACATTGAAAGATGTTGAGAGAAGAATTGGCGAAATTAAAATGTATATGCCGAATGCAAAACAGGATGTTGAATCTATACGAAAGGAATTGGAAAGTATGAGTTCCATAGACAAAAGGGTAAAAGACATAGAGTCTTCT…	0.162072	Q8JHV6	RecName: Full=Laminin subunit beta-4; Flags: Precursor
LYa_b1_contig_343838 (1..486) consensus	8.38276	0	GTGAAATCCGGTGAGTTCGAAATGCAACCAGGTGGACGGGCAAAATACTCCTGGTATTGTATGTCATATCCAACGCTCAGCTGGAAAATACAGGCATCTTCTGATTTAAGATCAATAGCTTTGTCTTCATTATTGATAAACAAACATCGGGAAGCCAAAACATCACCAGGTCGTATTTCTACGGGTCCGTTTACGACATCAAACCATACCTGATGTCTTTCTCTAGTTTTCTGACCACCAAGGTATGTCCATGTGTTATTTCGAATAAGAAATCCTTCGGCAAAAATACCATGGACATGTGTGTGTACATAATAATGAAAGGCAATTGCTGTTGGTCTTTTCCATTCGCAACCAACATGTGTGAAGAAACCATTTGGTTTATTTGCAGGAACGAAACCT…	3.839e-11	P08478	RecName: Full=Peptidyl-glycine alpha-amidating monooxygenase A; Short=PAM-A; AltName: Full=Peptide C-terminal alpha-amidating enzyme I; Short=AE-I; AltName: Full=Peptidyl-glycine alpha-amidating monooxygenase I; Includes: RecName: Full=Peptidylglycine alpha-hydroxylating monooxygenase A; Short=PHM-A; Includes: RecName: Full=Peptidyl-alpha-hydroxyglycine alpha-amidating lyase A; AltName: Full=Pept…
LYa_b1_contig_8738 (1..763) consensus	8.33088	0	GCATTTCATCAAACGCATTATCAACAACCCAGCCTTCAGAAGGTGAAAACAATTCTGTCCTGGTTTTTTCATTCAGTAGAGAAAACGGATAAACTAACTCGACATTACGTGTTTTATTATCTGTAATATCCATAATTATCTTTAGTTTTTCCTTATTTGTTAATGGATGGTAGTACACATTGACAAATTTTTCAGTAATTCTTTGGTCAGAAAACATACCAAGCAGCATACTGGCCGTTATCAAACTGCAGTGAATTTCTGGAATTTTATTTTTTATCCACAAGTCTGAAAGCAATTTTCGTCCTATCAATCTATAATTCTGAGGACCAATCTTAAATGTTAAGAAGAATATACTTTGTGGCAGAGCCCAATGATTCTCAGAAAGTTTCTCCAATTTTC…	2.17956	B0XVA3	RecName: Full=ATPase synthesis protein 25, mitochondrial; Flags: Precursor
LYa_b1_contig_13474 (250..911) consensus	8.26475	0	TTTGTTGTTTTTTATTACCACCCTGGTTAGGACCTATCTTTATGTTTTTCAATCCTGTTGCTATCCCAGCAGCGGCGTATAGCTTGTCATCCTCCTCTCCATCATAAACCCTGTCTTCATCAACCTCATGAATTGGAACATGATGTCTACTTGTACAACCTTCCCCTTCACAGCTATGCCCGAGATCTGATCTTCTGTTGCGTTTATTAAAACGTCCATGGATTATACATGTAGGAAATCTGACTTTGTGTCCACAATTATAACACTGGCATATTGTTACATTCATTTCTCCATGGGCACTAAATCTATTTCCACAGTTGGTGCAGTCAAATGTGGCCCATCCCCATTCATTTTCTTTTGGTATAGGATCATATTTCTGTTTGCATTTTCTACATTTAG…	9.777e-29	Q32L09	RecName: Full=Repressor of yield of DENV protein homolog; Short=RyDEN
LYa_b1_contig_104351 (16..516) consensus	8.17473	0	TAACACTTCAGAAAGACTTTTATGTAATCAACAATAGTATCATTTATTCATACCAACCAGTTTAAACCACGAGAATGTACACCCTGTCTGTCATTGGTCTTAGTATTTGTCTTGTGTATATTAGTATCATCATGCAAGAAGCGGAAGCTGACTGTGCTGCATGCGGCACAGCTTTCACGGGCGGAATCACTGGCGCAGGACAAGACAAGGAAAAAACCTGCAGTTTAGTGAATACTTATCTGACATGTTTGGATGACGAGTGTGATGCTGCTGTATCCAAGGCCGTTATTGACGCAGGCAAAAAGGTTGCAGCTGGTTACGGTTGTGGTGCCGGAAGTATTATTGTCAACCTGACTGTCATTGGATTAGGACTTGCATTGTATATGCTTGTTTAGATGT…	3.94435	Q61043	RecName: Full=Ninein
LYa_b1_contig_172355 (1..270) consensus	8.13012	0	ATTAAGTAAAGAGTCACATGCTATCTCCATACCGTTCGCTACGGATCGTGTCCAGTCATCTATAGTGTCATGGTCAGTACATGGATCAGCTGTTATTAAAACAATAATATTAAGGCACAACAACCACACTAGTGTAGAATCCATTAATGAGAATTATACCGTCAGAACCTCGTCAGTATAGAATCCATTATTGAGAATAATACAGCCATATTTAAAACGTAATGCTCTGCTAACGGGTTTTCACAAAATAAGTCTATACTTCCTAGTTTT	0.111381	P07911	RecName: Full=Uromodulin; AltName: Full=Tamm-Horsfall urinary glycoprotein; Short=THP; Contains: RecName: Full=Uromodulin, secreted form; Flags: Precursor
LYa_b1_contig_85375 (1..1147) consensus	8.0261	0	TACCAAGAGTGTACAAGCACTCTTGTTCATTGTGAGAAGAATGCGTCTCAATGTTTCTGGGGCGATTAGAAGAATCTTTTGAATTGTCAAATTTAAACAGGGTACCACTATTGCGTCGAAAATACTCCGCTATACTTTGGCTTCGAGTGCAAGACACCATGGTAGTAAACATTATCTCTTGTCCAGGTTTGTATTTGTTAGTGACATTTACATCAACTCCTCTGTATGTTTCATCTTCAAATTTCTCCAATTCTGCCCAGAACGTAATGGTTATATCAAGCAATAGTGCATAAAGACCCAAAGCTAAATCATCTGCAGCTGGTTTGTATCCATCCTGAAATTCCCTCCCTAATGCTTTGTTTACTTGTTTATACACAAGGTTGCCAGTGTAAAATTCGA…	1.36169	Q2GM68	RecName: Full=Methylthioribose-1-phosphate isomerase; Short=M1Pi; Short=MTR-1-P isomerase; AltName: Full=S-methyl-5-thioribose-1-phosphate isomerase; AltName: Full=Translation initiation factor eIF-2B subunit alpha/beta/delta-like protein
LYa_b1_contig_51853 (2011..3511) consensus	8.00259	0	GGTAAACTGTTTATGACTGGTGGCGTGTTTCGTATAAGATTGACTGTAAAACTCTCTGTATCACTTCGCCTAACATCATTACACCGCACTGGTAAGGTGTATGTCGCAGTTGTATCATAATCTAGAGTTGTCCCGCCTGACAGATAGATTCCATATCCAGTATTTGCAGGAGGAATAAGCGATACATCATATATAGTACTGGTTGGATTCAGTGTACATGTAACTGTGTCACTCTCCGCGTCAGTTACAGTTAGTGTGTGGAGTAAAGTATTGGTGTTCCAATCCTCCAGAAAACTTACACTATCAGGTAAACTCTGGATCACAGGAACCTGATTTGGTATTAAGTTGATGGTCAGATCAGCGTCTACTTTGTCATCTCCGTCATCACATTCTACTGTT…	0.0268116	Q9H251	RecName: Full=Cadherin-23; AltName: Full=Otocadherin; Flags: Precursor
LYa_b1_contig_96479 (18..981) consensus	7.80252	0	GGACTTTGGTTTATAGCTGCCAGCACAAACAACACATTTTTCTCTAGCGCTGCTAAAACAATCCATATACTTTTCTGTAGCGACACGACACCATCCGCAAGTTGTGTCTACAATGTCTTCTTCGCAACATTTAGAGCATGTTATATAACGAAAAGCATTGTTCAAAAGTGCAATACCACCATTAACGACAGCCAAAACACGCTGTTTAACGAATTGTTTAGCGCGACGTTTATCTTTTTTACGAGCCTTCAAACTCGGTAGGCATACATCTTGGTACTTCAGGAGAAGAATTGCTTGTGGTATTTCTATGAAAAGTAAGGAATAAAGAGTTTCTGTTCTACCATCCAGTAGTTTTTTAGGAGTGCCGTCGTTGTCTTCGCTAAATTGCTTTTTCTTTTT…	2.91895	Q4FVL5	RecName: Full=Translation initiation factor IF-2
LYa_b1_contig_189663 (49..402) consensus	7.53641	0	TCATCAACAATCCAATTAAGATACTGCAAGACCTGCTGGTGAGTCATAAAGCAAGGTAAACCATATTTATCTAATGGATAATCGTCAATTTCCATCAGTGGTCCTGGGGTTACTGTTCTTAGATTATGATAAATGGCACTGGTTATAGGTCGTCCATAAATGTCTTCTTTGATTTGATCTGTATACAGCCATGTTCCTCCTAAATCAAAGTTTCTCTCAAAGCATTTTAATTTGAAGTCTTTATTTTGGGAAAGCCGTCGAAGTGCTGAAATACCATGTAGTCCTGCTCCAATTATACCGATTCGCTTTATATCAGACATTTTGTTCACACACGTCGTACCTTATAAGTGTACA	1.434e-10	P97501	RecName: Full=Dimethylaniline monooxygenase [N-oxide-forming] 3; AltName: Full=Dimethylaniline oxidase 3; AltName: Full=Hepatic flavin-containing monooxygenase 3; Short=FMO 3; AltName: Full=Trimethylamine monooxygenase
LYa_b1_contig_73399 (360..1503) consensus	7.41394	0	CAATAGGTGAAATATTTGGGTAGTTGAATCCAGTGAAAGCTTAGGGCAATGTGATCACTATAGAACCCTTGTTGAAAGTTTCTTTTGAATAATAAAGCAGTATACAACATTTTAATTCAAATGTTAACATGGACACTACAAATAGATGATGAGGATTTTTCTAAGCTTCAGGAGATGGTCAGTTCGGTCATTGGCAATTCATAGTTTCTAAAACAAAAAAGTATAGAATTTAAAAGTCGTAGCTACAAAAGTATATCTAACATTGACAAAACAAAACGGGGGGAATTTATTCATGAAACGAAAACATTACACGATTGAAATAAAACCTAGAGCTAAGAAATAACGGTTTTACTTATGGTTTTGACACAAGAATATCAACAATATTGTTTGCCAGACACG…	1.826e-08	Q24372	RecName: Full=Lachesin; Flags: Precursor
LYa_b1_contig_28145 (1195..2477) consensus	7.4011	0	TTTTTTTTAAATCTTTCTGGTATATTTGATGTGCATATTTAATATAGTCTTTAACTTCTCTATACACCAAAACTGTTTTGATTCCTTATTATATATGTATGGTATTTCTTTCTGGCATAAAATGCGTATCAGATGTAGACTTCTCATATCTGAAAGATGAAGGCTACGAAAATATGAGACGACAACATCTGATTTACATAGAGGTAGTAAATAAATATTTTATCTGTTCTGTTGTTCTAAAAACGGCAATTAGTTTTGATAAATCAGGAAAAACTGTCATCATCTCAAATTTTGTAGATGCAGTAGATGTTTTGAAGTTTAAAATTTTGGAGTGAAATCTTTGAATAATTGCGTTTGATTTTCTGGCATCGAACTGAGACCTTATCACTGCTTTTGTAT…	5.68693	Q86UK5	RecName: Full=Limbin; AltName: Full=Ellis-van Creveld syndrome protein 2; Short=EVC2; Flags: Precursor
LYa_b1_contig_26001 (1..369) consensus	7.24397	0	TTCATATTTTCCATTTTTCCTGTCCTTGTTTGCACTGTCTGCATAGTATGTGGCACAAAGTCCAAATGGAAAACAACAGACAACTGCAACAAGTGCTAGACACAGATAATCATTGTTTGCTTTTTTCTTTTGGTTCATCTTCCATGCTTGGAATTCTTTTGAAAAGCATTCATTGCCACCGGAAGTGATTTTATATTGCTGTTGTAGTTCATCCACATCTACTAAAATCTCATTACCGGTATTAAGCTGAGCCATAGTGCTTAGTCCAAATGTTGATGATATTATTTCTATATCAAAGTGATGAGTTAATACAAAATGTACATCTGCGTTCTTGCAATCTGCATTTGTTGATGAACTTCTTTGATAAGT	0.959518	Q5TZE2	RecName: Full=Synapse differentiation-inducing gene protein 1-like; AltName: Full=Capucin; AltName: Full=Dispanin subfamily C member 1; Short=DSPC1; AltName: Full=Transmembrane protein 90A
LYa_b1_contig_22248 (1..810) consensus	7.10267	0	CTGGCTCTTGATTTTCAGATGTTGACTTGATTGGTTTGGAATAATTTGACAGAGGAACCACTACTTTTTCTTTGCGTATTTCTTGTTCATTGTTAGTGAGTGAAAAATCTGTTGAATTTGCCTCGGTAATACTAGTTCCGTCCTGGGTGACGTAAAAAGTTGATCCGGATGTTTCTTTCGATACGTTTGATCTTGCCGGCTTCGTCGAGTTTCTTCTTGCGTTTGTATTCCGAATGATAGTGTAAATTTTCCTAGCTATTAGGGAATTCAAAATTATAAGTTCCAGCATAACAGATGTTATAACGAAAGATATAAAAAAGATAAAACCTAGGATATAATCACTGTTTTCATTTACTTCAAACACGTCTGCGCCACAAATATATCCTGTGACATTCAATG…	0.0001247	Q9W6A7	RecName: Full=Red-sensitive opsin-1; AltName: Full=Opsin-1, long-wave-sensitive 1; Short=Opsin LWS-1; AltName: Full=Red cone photoreceptor pigment 1
LYa_b1_contig_13210 (17..570) consensus	7.08559	0	GCAGGTTTCTTTTATTTCATTTTAAATTGAACACATTCTGATTATGCAATCAGCACCAATATCTGTTAATAAAATGTAATCAGAGTCAACTACTATTTTTCTTTGTCAAATTCTTCCAGAGTGACTGTTCCATCTTTATCTTCGTCCATGATTGACCAATGATGAAACATCGTTGTGTTGTCTGTTATTTCCATCTGTTCCAAGGCTTTAATGAACTCAAACTGTTCAATCAGGCCATCACTGTTGATATCTAGACTAGCAAACTGAATGCTTGCAGACATGTCTTCATCCAACGACACATCACGACGTTTTCTTTTGTAATCTATACATAAACATCGTCCCCTATGGTCAAAACAAATTTTATCATATGGTTCTGTTCGGCAGGTGCATCCACAGCCG…	0.0136684	P81614	RecName: Full=Mytimycin
LYa_b1_contig_22965 (79..1526) consensus	6.99463	0	ATAAAATGTCTGTTCTTATGACCGAGTAAATATTATATTTTGCGGACACAATGAAAGTGCATGTGTTTTTCGTAACTCATAATAACGAATATAAGAATAAAATCGTATATATCGACATTGTCCTACTCTATATGACACTAGCCATTTATGAAATATAGAATAAGGAGATATGGTAGGATTGTAATTGAGAAAACTATCCAACGGAGTCCAAGTGAAACGGATCTTCAACAATCATAAAAACCTTTACCGTCTAAATAAGTTAATTTTCAGACGTTGATTACTTCTTTCTATCTTCTTGTATTTTTCTTAGAATCTTAGTAAAATCAATTATTCCGATTTTTAATTTTTTCATGTCAAGGCCCTTCATACCTAAATATACGGTATGGTTTTCGTTCATTG…	0.002437	Q91910	RecName: Full=Hepatocyte nuclear factor 1-beta; Short=HNF-1B; AltName: Full=LFB3; AltName: Full=XlFB3
LYa_b1_contig_9811 (1..838) consensus	6.9778	0	AACTGCTATGTCAACTGTTCCACCTCCAATGTCAACAACCATGTATTTACAACCATTTTCTGATGCTTTAAATCCGTAACTTCCGCCCATTATTTGTTCTGGTCTTAAACTTTGACAGAAGACAGATGCACACTCTGGTTCAAGAGCAATTGACAAATTCTCATCGGGAATTCCAGCCTTGACTGCACATTTCCTCATAAAATTCCTAGCGCGTTCTCCCCAAATAGCAGGTACAGTTAAAACCCATTTGATATCAGGAAAGCCTATACATTCAAGACCAGACCTTTCTTTTCGTTCCATGAAGTCGATAACAAGAGCTTTAATCGACAGAGTAAAGACATCAACAGCAGGCATCATCTTACCACCAATGTCAAAGGCTGTCATTGCAGGACATATAAT…	3.188e-29	Q96MM6	RecName: Full=Heat shock 70 kDa protein 12B
LYa_b1_contig_36654 (1..484) consensus	6.80942	0	CACTGTCGTCTCCGACGTTTTGATCAAGTTCTTTTTTAAGACATTCTTTTAGTTGATTTTTTGATAGTTCCGTAAACAGGCCGGTGGCTTTTGATTTAGAAATACACTGGTATGTTAAATAATTTATGAAATATGTTGTGATTGCAGCTCTATCCTTTTGATAACTCGTGAAACACTTTGATATACAAACATATGCTTCCCTTTGAAACGTTCTCGTTATGACATCTATGCTGTTTGGAGGGTTAACTTTTAATGTATGGGCATATGAACCATTAGGCATACGCATAAATGCATTTATTCCTCCTTTTCTCATGAAATCGAACGATCTCTTTTCGTCAGTGTTCTTAAAAATGGTCGAATAAGCTACAAGCATGATAAAATGAGTTATATTTCCTTTGG…	1.20615	P0C6W1	RecName: Full=Replicase polyprotein 1ab; Short=pp1ab; AltName: Full=ORF1ab polyprotein; Contains: RecName: Full=Host translation inhibitor nsp1; Short=nsp1; AltName: Full=Leader protein; Contains: RecName: Full=Non-structural protein 2; Short=nsp2; AltName: Full=p65 homolog; Contains: RecName: Full=Papain-like proteinase; Short=PL-PRO; AltName: Full=Non-structural protein 3; Short=nsp3; Contains:…
LYa_b1_contig_11556 (1..404) consensus	6.80253	0	AGAAGTTAGAGAGATCAGAACCTGGGCATCATACCATTGGAGCAAGTATAAGCAGTCATATGCAAGCAGAATAGTGACAAACAGTAAAAGAAGGGATGCACTTCTAGAATGGGATACAATAAATTATACCAGGACACTCCAAAAAGAAGGAATTATTATTTTACAACATTAACATTAGCACAGAAGATAAAGTGAAACCATATAACAGTATCGTCAAGGGACCAGATGTGGACTGATAATAACTTAAAATTACTTCTTTTTTTGAAATGAGTGAATTGATATTTTATATTCTGTATAAATGATGAAATAGAAGATTTCATTTTACATGATGTCAATAAAAATAAGGAAATATGGTATCATCTATGATTGCTAATGAGACAACTATCCACCAAAGTTGAA…	8.83251	Q1IQ55	RecName: Full=30S ribosomal protein S15
LYa_b1_contig_5612 (1..363) consensus	6.72383	0	ATACCACGAGTGGGTATTTCTAAATACAGGTTATATAGATTTTTAAATCAGCATTGTTCATTTTTTACCCCAATCTATTGAATGAATGTCTCCATAGACAGATTTGAAAATCCTTAAACTTCCGTTATACTCATCGACGATAAAGCTTGTGTCGGAACCCGCACTAGAACAAATAGAATAATCTACGCATAAAGTTATACTGTAGTATTTTCCAGTTTCGATTTTGGTATATGATCCAGGTCCGACTGTTCTTGTTGTTGTATGCCTACCATGGCTTAACGCTACATGTATAGATTGGTCTGATCTATTGACAACGTAAGTGTTATCTCTGCCCCACAAGGCATTAGCATTCTCTAACCAGAA	0.115349	P09310	RecName: Full=Major viral transcription factor ICP4 homolog; AltName: Full=Immediate-early protein 62; Short=IE62
LYa_b1_contig_5656 (12..2404) consensus	6.71716	0	TTTTTTTTTTAAAATGGTCACATTCGGTCGTTATATCAGTTACTTGATATAAATTCAAATAGAACTATCTTTCACTTCAATTTGACAGGAGCCTTCCACCATTGACAACTCATATGAGTTAAACGATACAATTAATTCCTTGGCCCCTTTCCTTTTTGGCTGGAAACCAAGTGAAGTCCTGAAAGTTTTATTAGCCGGTACCACGTTTTGTGGTATCACTGTGCTATGTGCTAGACCGGGACCCTCTACTGTTAGTTCACAGTCTGTCAACGCAAAAGGCAGTGGATTATCGAAGGTAATTTCTATTTCAACCTGTTCACCAATCTGTCCAGTTGATGGTGCCTCTATGTTGAGATCTGGCTTCATCAGATAGAATGTATCATTGCTAACATATATTTG…	1.571e-179	P23606	RecName: Full=Protein-glutamine gamma-glutamyltransferase K; AltName: Full=Epidermal TGase; AltName: Full=Transglutaminase K; Short=TG(K); Short=TGK; Short=TGase K; AltName: Full=Transglutaminase-1; Short=TGase-1
LYa_b1_contig_4279 (41..2238) consensus	6.70369	0	TATCAATTTTAAAGTCCTCTTTTCACTTCTTATTGTTTCTTTGACGATTCATATGTTCAAAATGTGTTTAAATTCATTGATGTCGAAATGTTGGATTGCTGATTCTCTGGTATTTAAATCCTTGATAATATCTTGCTGTCGTTCCAAAAAACTCAACTTTGCCTTTAACGATGCAATTTCTACTTCATGTTGACGAACCTTATCTAATTGGTTATCATATTGCTCTAAACTCTTTTGTTTCAAAATTTCTTCTGTTTTCCGATAGAAATAATTTGAAAAATATGGTTCCGTAGTCTCTTTACGTATTTCTTGAACGATTTGTAGAATATTAGTGACAAAACGATTTCGCTTTTGTTTTTCAAAGTAGAGAAGTCTCCCCTTTTGTACAAGCCTTTTGCA…	3.222e-08	Q8K3K9	RecName: Full=GTPase IMAP family member 4; AltName: Full=Immunity-associated nucleotide 1 protein; Short=IAN-1; AltName: Full=Immunity-associated protein 4
LYa_b1_contig_26230 (1..1038) consensus	6.67321	0	AAAACAGAGTTGTTTGTTGAGATAAATTATGTTGGTACATCATGTCATTAAACCTTGGATTTACATATGGTAACATCGCGATCGTGTGATTGGTTGATCCTGGCCCTCCTTGATTATAATATCTGATTGTCAATTCCAGCTTTTCTGTTTCTGAAATTAGTCTGTCGATTGGAACACTGCAAACTCTTCCTTCAAATGTAACATTCACCGTGTTAGTGCCTTCCTCATTGCGTTTTGAAACATCGCTTCCATCATACTCTTCTTCAAAGTCTTCGTTTTCAATATTAGTAACAGTGTCAATTTTGATATTAAAATTCAATCTGCAATTATTCGGCATTTTGTGTTGTTGAAATCGTGGATTGATGGAGATTGATTTAATCTTAATTCTTCTGTTTGCAC…	2.822e-18	Q9BX70	RecName: Full=BTB/POZ domain-containing protein 2
LYa_b1_contig_20147 (77..1550) consensus	6.65561	0	ATAGCTTTTCATTTTCATTTACAAAAACAATTCTTCCTGACCCAGTTGAAGGAAATCTCGGGGCTTCGCGCTTATATTTCGGCATAAAATATGTTGTTGTCTCCATATCTTTCTTCATTCCATCCATTCTATGTCTAGCATATGTTTGACATTTGTATACCCGTGACCGACATCCACAAAATGAAAAGGCTACACAATGAGCATCATTTATACAATGCCTTAGACACTGTTCTTTCGAAAATGTAGACTTACTTAAATCAGAGGATAGCCTTGATCTCCCTGTTAAAACAGTTTTTTCGAAATGGAGGACAGTTGCGTATGGTATTTTAAAATCGAATACAACAGAATCCCATCGAACGGCCGTTTTTGTCGTCTCGACGGCAGAGTAACACCTTGTTT…	1.852e-09	P0C8G6	RecName: Full=Perivitellin-2 67 kDa subunit; Short=PcPV2 67 kDa subunit; Short=PcPV2-67; AltName: Full=PV2 MACPF subunit; Flags: Precursor
LYa_b1_contig_51853 (59..1957) consensus	6.46408	0	CTGGAATGATTTCAATGGTCTTTTCCGCTTCTTCCTACGCATGCTTTGTTCATTTTTCTTCAAACATGAACAATTCGATTTGTAAAGAGTATGTACAATAACACAGAAGGTGGCAAAAAGGATGAACATCAGAGGAACAAACCAAGCCATGTTCGGAGAATATCTGAAGAATGTTAAGTACTCGATGCCATCCCCTGGAGTAATGGGCGCCACATACTGTGTTGGAAATACAATATAAACCATCGTGAGACCCTCCCTGCCTCCTGTGTCCACACCATATATGGTCAGATTCAAAGTAGAGCCTTCAGTATACTGAGTCAAACTTTCGCTGACAAATATCGAACCATTTTGGACAACATCGAACAAACCGTAATTGAAATCTTCGAGTGCAATATGGTA…	6.6e-25	Q9NYQ7	RecName: Full=Cadherin EGF LAG seven-pass G-type receptor 3; AltName: Full=Cadherin family member 11; AltName: Full=Epidermal growth factor-like protein 1; Short=EGF-like protein 1; AltName: Full=Flamingo homolog 1; Short=hFmi1; AltName: Full=Multiple epidermal growth factor-like domains protein 2; Short=Multiple EGF-like domains protein 2; Flags: Precursor
LYa_b1_contig_4367 (8..748) consensus	6.26318	0	TTTTTTTTAAAAATGATTTAGATGTTTATTTTTTAAGTTATTCAATTAATTGATTGTTTTTCCGATGAATCACGTGTCTCCTTCAGCGATACCAACAAGTACTCCTTTTCTGGCACACATAATTATTTGTAAAGTAACACGGTCGATCGTTCCATTTCCATCTACAGTGACGACAGTTCTGCATTTCCAAACAATTCTCCCGTCCGTGTGCATTATCAGGTTGGTTAGGACTCCATGGCTTATACCAGATATTCTTCCCAGAATTCCACCTCCACACACCTTCGTTTACGTCACGTCCTCCTAACCAGTAATGAACGCCTTTCTTAATTGTATTAGCCATCTTAATCAGGTAGTCTGTGTGATCTTTGTTCAGAGGTTCGGCAAGTTTAGCATCATATC…	1.663e-19	P82596	RecName: Full=Perlucin
LYa_b1_contig_10555 (1..308) consensus	6.19671	0	CCACCATCAGAATTAGCTGGTGTACTGTGGGACGTGCATCTCATGTTTGCCCGCTCCGACCCATTTGGTGTACAGCACGAATAAGTATACCTGTACATGTCGTGACCTCCATTGCGGTTAAGGTGGAACTGCTTTAAAAATCCGTTATAGGGACAGGTTACTTGATGACGATCCAAATATACCACTTTACCTTTCCCATCAAAATTGAACATCGTGTGTCGTGATGCGGTTGTACAGCTGAAATCACGAGGTAGACTGCAACAACTTAAATCATATCTGACCCGGTTTCCGGCTCCGTTCCGTACCAA	3.42641	Q8EZQ1	RecName: Full=Glutamine--fructose-6-phosphate aminotransferase [isomerizing]; AltName: Full=D-fructose-6-phosphate amidotransferase; AltName: Full=GFAT; AltName: Full=Glucosamine-6-phosphate synthase; AltName: Full=Hexosephosphate aminotransferase; AltName: Full=L-glutamine--D-fructose-6-phosphate amidotransferase >gi|67460905|sp|Q72V57.3|GLMS_LEPIC RecName: Full=Glutamine--fructose-6-phosphate a…
LYa_b1_contig_3758 (1..1054) consensus	6.01511	0	TCCGAATACACTTGACAAACACTATGGCCAATATAAGGGCGCAACAAACTAGACCAATCAGAACTGCTGCTACAATCAATACGTCTTTTTTCTTTTCATCAGATTTACTGCTATCAAAGTCCGGTGGCTTTAATGTTGTCGTTGTTGCTGGTGTTGTTGTGACAGGTAATACTCCGACACAGTATGCACTCTGGCTTTTCACAGTTTTACTAAGATTGTAGACCATGAAGTTTCCACAATTTCGTATTTGTATGTTTACTGTAGATTCGCACGTATCAGTGTTGCCAGTAATACAGCATGTTCTGTCAACTGTTTTATCTGCTTTAGATGGCAAATAACCATTTAACCATACTGGATAACTTGTACCACAACTCCCAATTGGTTGACTTGAATTAACTA…	8.104e-15	P48733	RecName: Full=Uromodulin; AltName: Full=Tamm-Horsfall urinary glycoprotein; Short=THP; Contains: RecName: Full=Uromodulin, secreted form; Flags: Precursor
LYa_b1_contig_10872 (1..1742) consensus	5.63599	0	GTAGTCACTCCATTGTTCTGGAAGAAGATAGAAAATGATTATGCAAGCTGTAGCCTAGCATCACTACAGGATTTCTTAAATGAACAATCCACAATTCATGTCCTGTTTCACCTACGACACAGAAACACTTGGTGCTGTAAGGACAAGACAAAATGTTCCAATAACCGTTCCCTCCCACTCCAATATTGCCAATGGGATCTACTGTATACAGAAACAAATCCTAGCATTAATCCACATGACTGCCACTGTAAATTCTCCGCCAATCCTGTACAACTAGAGGATCTAGACATCACCTTAGCAAGCCTGATTCTTCTTAACTGCTGCACCCTTACACCTGATGAGAGAGCTGCCATCAAAGAGTTACGACAGTACAAGAATGACTACCTCAGTCACAATATC…	0.0841696	P07307	RecName: Full=Asialoglycoprotein receptor 2; Short=ASGP-R 2; Short=ASGPR 2; AltName: Full=C-type lectin domain family 4 member H2; AltName: Full=Hepatic lectin H2; Short=HL-2
LYa_b1_contig_60359 (17..438) consensus	5.60785	0	ACACACATACATTTGTTTACCAATTTTGTATAATGGTTTTCGAAAGACATCAAAGTCGTCATAATGTATTTTCCCGAGGACAGATGCTACTACTCCATATCAAGTCCGACGACGCGGAATATTTATCAAACTGTTGTCCAAAATGTTTCCCTTTGGATCATCTATATAGCTTTGTATGGGTCATTTTACAAGAAAAACTAATTTATATTCATGTATCAAATATATCAAATCATTCTTCGAAAATTGTAATGTTCTTTACGTTGATTACAACTCAAAACATACTCATAATCAAATTTATTTTTCAGCTGCGTCAAGGGCGGCATTAAATGCTGCTATTTCAAACGAACAGCCAGAAAATACACACCAGTTGTTGCCAATTTCTTGGACATTTTCTGCTGC…	0	not available	not available
LYa_b1_contig_60444 (1..667) consensus	5.55334	0	AGAGGTTTCGTCGATATGTTGATGTCAGTAACACGTATCAGAATTCATGGACGGGTTCGAATCCCAGTGAAGGCATATAGAAATCACAAAAAATAAAGGTAAGTTTTTAAAACAATTCCATTAGTGAACAGAAATCAGTAAATTAGTCAATTCAAACTTAATGAAATTAGGCACACAAAGGAAACAAAAGAATCTAATATGGTGAGCCCATTTCAGCGACAGATTTAGGAAGCGTTGATTCTAGAAAAAGAATCCACGGTAAATGAATAGGCTGACGTCACCACAATGGTTTAATTAGATTTAGTCGAAGAATTTTAATCCTAAACATTGTTTATAAATAATCACATGTATTTTCAGGTTTGTTCATATGAATATATCAAAATGAGGCATTTAAACAAG…	0.070839	Q02183	RecName: Full=R-phycocyanin-2 beta chain; AltName: Full=R-phycocyanin II beta chain
LYa_b1_contig_905 (1..301) consensus	5.5341	0	TATAAATAGAGATCCTCCATGGACCACCACATGTCTGACGTTTATTGCCTGAGCATGGCGTTTTACAATCTCTTTCTTTTCTTTTTCTGCATTTTCGTAAAACATTCCCACAAAAGCATTCGTATCCATACTCAACACCTGCAAACTTGAATCCTTTTTTACCACAAAACTGTTGGCATTTTTGAACTGTCATACCTTTGTCTCTCAGTACAGCTTTAGGTAATATTCTAGTTCTGTCATCCTGATAACAACCAATATATCCTGATTCAACTACTACCTGTAGGACTGTCACAAGCAACAA	8.749e-14	A2BGL3	RecName: Full=WSC domain-containing protein 2
LYa_b1_contig_16644 (1..985) consensus	5.29728	0	GAAGAAGAAAATAACACGTTAACTGAATGGCTAAGTCAAAACAAGGAAACGATAATACAATCGATAAGAAAGGATGCAATGACGTTTATTGAAATTCTAAAAGGTGATAGTAAATTTTTAGATGAAAATATAAGAAAAGACATTGACAGTTTAACTAGAACACCGCGGTTATCATGCAAGGGTATGTGTAGATATTATTATACTATTATTTTAACAAAAACAACAAGTAATAAAGGAACGTCAACAGAATACATACTACATGACAACGAAACGCCTCCTGAATGTATATTAGAAGATAAAGACACTATGACTGAAGGCTCACTCCAGGACAAAGAAACTATGACTGAAGACTCACTACAGGACAAAGAAACTATGACTCAAGGCTCAATACAGGACAAA…	3.815e-09	Q6V4S5	RecName: Full=Protein sidekick-2; Flags: Precursor
LYa_b1_contig_32710 (1..1168) consensus	5.27869	0	ATTCAACATCAGACTTAACAATCACCGGTCGTTCTATACAAAAGGAAGAAACTGTCCAATTACGAGACACCTCTTAAGAACAGGACATACTTTTGATAATATCACCTTTCAAATAATTGAGGTAAACCAAAATTGGGACTCCGAAAGGAGAAAACAGAGAGAAAGGTTCTGGATGCATCAGCTACGTACTCTTGAACCTGATGGACTTAATGAGAGGGATGAAAAACAGTTCTACCCAAAACCAAAGGAATAAATCATTAATTTCATTCCATTTAACTAAAACAACTATTTGTTTAGATTTAAAATTGTTGTGTACAATAAATGAGTATTTAATTGTGTTTCTCAGTCTTTGTTTTTTCTCTGTTGTTTTTAGTTTATTGTTGTTCATTTGTTGTTTGT…	7.63757	Q13614	RecName: Full=Myotubularin-related protein 2; AltName: Full=Phosphatidylinositol-3,5-bisphosphate 3-phosphatase; AltName: Full=Phosphatidylinositol-3-phosphate phosphatase
LYa_b1_contig_9842 (1..947) consensus	5.04325	0	TGATTTTGTCGATGCCGTCTTTAAACATTTGCAGCACAACATCAGGGGGAAATATAAGCATGTTTCTTATAAGTTTAGCCTTTTCCTTATATTCCTCAGCAATAGTGTCCGAATTGGAATTCTTAGCCCCTATAATTAACGATCTAGGAATTTCTAGTCTCATTTTTCCATCAGAAGTAATAATTCGCTTTTTCAATTCAACTTTTCTGGCAAGATCGAGGTAGTCGTCTCGATGTTCTGCGATGAACTTTGTTACTACTTTATCACCAAATATACCTCGCAAGAGCTTCCATATTCTTGTATTGATCGTGTTACCTCCCCATGGTCCACCAGAGGCGCTGTGTATTTCTTTCAATTGTCCAGATTCTAAGATTTCATTTGATGTTATATCGACTGTTC…	4.281e-49	Q8K0U4	RecName: Full=Heat shock 70 kDa protein 12A
LYa_b1_contig_51286 (1..1044) consensus	5.03458	0	GGAGCATGCTTCAAAAACGGAAACGTGTATACTGCAAAATAGATCAAACCTGCAGACAGTACAAAATGGGAATAAAATGCTTAACCTTAACCCTGTTGTTTGCCTTGCTAAGATTGACACAAATGAAGTTACGAAAAAATCAGAACAAAGGCATGATGCTTCAAAAACAGAAACGCACAAACGGCAAAAAAGCTTGAACATGCAGACAGGAAAAAATGGGGATAAAATGATTAACCCAGTGGTATGTCTTGTTAAAATCAACACTGATATAATAACGAAAAAGTCCGAACAAGCACATGCTTCCAAAACGGTAACGCCAATACTGCAAAATAGTTCAACCTTGCAGACCGTACAACATAGTGATAACATTGTTGATGCCATGGTTAGTCTTACTAGAAT…	0.228701	P75083	RecName: Full=Uncharacterized protein MG028 homolog
LYa_b1_contig_12836 (88..595) consensus	4.93508	0	TCAATTCCAATAAATAATTAAATATTTATTCCAAAAATAAACATATGTAAGAAATGCCATTTCTTTAGTCTCAAATGAAGCAGAAAACGTCATAAGCACATTCTACACGTAACATGTCTTTGCATATTGAATGTCTTGAATTCATTAAAATATTCCGGTGTCACGCAAAAAGTATTGTTTTTAAATTTAAAATGTCACTCAAAACTAAACGTCTCGGTATTTGAAATATTTCCTGTAAGTTTATAGACCAAATCGGAATTTTATTTTGTTCTGCTTCTTCAAACTAAGAATAGTTCATTAACAAATGATGAATACAAACTCAGCGAGGACACGAGATTAAATCTCAGATGAAGTTTACACAAAAATACCACGATGTCGTATATGATAACGTCTCTGGTA…	0	not available	not available
LYa_b1_contig_129030 (277..1069) consensus	4.85716	0	GTTCATTCATCTGAATGTTAATTTAAATAGAATAGTCGTTTTTGTTCCCCACCTACTTATTAGAACTTATGAGACACTTCAAAAATGTTATAAACCGGTTTGTCCGTATATCAACATACAGGATAAGCCATGACATTAACCTCTGACACGTGTAACATTTCTGGACCTTTAGTGATGGTCAGTTTGATATAACGACCATCTGTATACCGACTGCGCTGGAATACCAGATGTTCGTTATCTGCAGCAGGTCCTGTGTAATGGGCAAATATCGACATATCATCAAGGTGGATCCCAACAGCTATTACAAGATCATGAAGTCTGCAGCCATTGGTGAACCTGTTGATCACTTCAATTCTCATGATATTGTAGATCTGTCCTAGATCTACCCACCAATATGGA…	3.077e-09	Q9I925	RecName: Full=Fucolectin-7; Flags: Precursor
LYa_b1_contig_15573 (1..1472) consensus	4.84478	0	TCTTGGAGGAGTTACCATATTGAAGAAATTCCCATCTCCTACAGACTTTTATGAAAATTACATTGCCAAAAGTGTACCGTTTATTGTGAAAGGTGTTCTAGAAAACGGACAATTTCCAGCATATAAGTTATGGACTGACCAATACTTAGAGAAAGAATATGGAAGCCTTTTTGTGGACGTGGAAGGAGGGAAGAAAGAGGACCGTAATGCACAGGCTTACACAATGCCCATGTCAAAGTTCCTTCAGATATACAACCAATCAAATGTATACATGGTTCATGACGTAGCAACAGAAATGAAAGCTGATATTACAATACCAGTATCTCTACAATGTGGAGGTTTAGAGAAGGCTATAAAATCCGTTATAATGTGGTTCAGCAGTGGCGGAACCAGGTCCGT…	5.088e-18	Q497B8	RecName: Full=JmjC domain-containing protein 5; AltName: Full=Jumonji domain-containing protein 5; AltName: Full=Lysine-specific demethylase 8
LYa_b1_contig_2924 (1..3928) consensus	4.79315	0	TAACAGTTTTTCAACTTTTTCGAATGAAGATTGTGTCTTCAAGTCAGCTGTCTTTCCTAAGATTACCCAAAAAGACATACAACGATTTGAACTGTCATCCTTGTTTTGTAATGTACACACATGTTCAATAAACAATTTCACAACATGAACTCGTGTCCATTGAAATCTAATATTAGACATTCCATTGATACAGCGTTGGCCGTAAAGCTGTTCACTATTTGTCTTTTCATCATTAAAATGACCAATGACTCTTTCAATAATCGGTCTGAACCTTGCAACACGATTAAACCACTTCATTCTTGTATCGGGTTTATTCAGCTCATCGTTGTTTGGTGTCAAATCTTGAAGCAGCCAGGTTAGAGCAAATATATCCAAGGTCATTTCTTCATCTGTATTGAG…	0	Q63HN8	RecName: Full=E3 ubiquitin-protein ligase RNF213; AltName: Full=ALK lymphoma oligomerization partner on chromosome 17; AltName: Full=Mysterin; AltName: Full=RING finger protein 213; AltName: Full=RING-type E3 ubiquitin transferase RNF213
LYa_b1_contig_5192 (38..2272) consensus	4.13627	0	TGTTAATTATCCATTTCTAGATGGTGATGTGCCCTTGCACCATTGTATGGTGTTTATATATCTTTTTTTGTTCGATTCGCTCGTGTGTGTAATAGTCAAAACTTTTACTAAATGTTATCATCGGTACAAGGACATTATTCATACATATGAATCATCATGCAGACACCTTGTACGTTCAGGTATTTCACATTCAATTTTTAATGGTAATATTCTATACAAAGCACAAAAATGTCGACATTCGACATTCACCTCAAAAGCTTACCAAACCTTTAAACAAACTTATTCTGAAGGGATGTTGTTATGCTACTGTTGTCAGCTCATTAAGGATGGCATATTTGTTATTAACATTGATTTTGGACTTTGCAGCGGAAATAAACACATTTAATTTTAAAACCAGTT…	1.42069	P45970	RecName: Full=Spindle apparatus protein lin-5; AltName: Full=Abnormal cell lineage protein 5
LYa_b1_contig_2769 (166..1034) consensus	4.02225	0	GTCAAATGAACAAAAATGTTGTAATGAAAAAAAAGAGTTTTAACATTGTTTAGACGTTACGCGCGATGTTCGTACCGTTTACGTATTTTGTATGTTTTGTGGGTAAAACTGCGCTTCAGGTGCAGAAAAAAAAACGTATTTTAATTAAAACAAAGATATCATTGTGCTGGATATAAATGTCTTTAATCAATTATCTCCATTAAAACATAATAAAACGCATTTGTTCGAGTTGTTATGCATTTGATTATGGATTTTGGAAAAATAATGGGCTGTCCCGGGTAACATTTGACGACGAAAAATGAAATATAAGCGTTCTTTCCGACTCTTTTGTTTGCCGATTTCCATTATTATTTTTTTTATTCTATTCTAGAAGTATGTTTGTAGCGTCTAAACCATGAA…	3.47109	Q9SL04	RecName: Full=Autophagy-related protein 8d; AltName: Full=Autophagy-related ubiquitin-like modifier ATG8d; Short=AtAPG8d; Short=Protein autophagy 8d; Flags: Precursor
			#N/A	#N/A	#N/A	#N/A
			#N/A	#N/A	#N/A	#N/A
			#N/A	#N/A	#N/A	#N/A
			#N/A	#N/A	#N/A	#N/A
			#N/A	#N/A	#N/A	#N/A
			#N/A	#N/A	#N/A	#N/A
			#N/A	#N/A	#N/A	#N/A
			#N/A	#N/A	#N/A	#N/A
			#N/A	#N/A	#N/A	#N/A
			#N/A	#N/A	#N/A	#N/A
			#N/A	#N/A	#N/A	#N/A
			#N/A	#N/A	#N/A	#N/A
			#N/A	#N/A	#N/A	#N/A
			#N/A	#N/A	#N/A	#N/A
			#N/A	#N/A	#N/A	#N/A
			#N/A	#N/A	#N/A	#N/A

## Sheet: UR_LYa (Bonferroni & FC>|4|)
Name	Fold change	Bonferroni	Sequence	e value	Accession	Description
LYa_b1_contig_383817 (12..894) consensus	-8760.25	0	CTCTGCTTTATTTCGAAATGTTAAAATATTGATTCTGTTTCTTTATTTATCAATTTAATTCCCCCATCTTGCTGCAGGCACATAACTTTCCGTTGACGTTTATCAATGTTACCCAAGGACAGCATACACAAACGTAAGCAAGGGGTGACGTGATGTGGACATTGTTACAATCTGAGAACACATTGTGGCCATTTACGACTGCAAAAATTTTACATATTTTCAGGCGATTGCATGATCTTCCCGAGTCGACTCCGTAAACTACTTTGGGTATCTGGCCTTTGCATGACGCCGAATTCAGAATTTTCAGATTCCTTTTAACTGGTTTGTCTGCAACCTCAGATTTTGTTATGTTGAGTAGTTTTGCGTCATTTGGTATACTCTTTTCATGATACAGTGGGT…	0.276458	P24322	RecName: Full=Geranylgeranyl pyrophosphate synthase; Short=GGPP synthase; Short=GGPPSase; AltName: Full=(2E,6E)-farnesyl diphosphate synthase; AltName: Full=Albino-3 protein; AltName: Full=Dimethylallyltranstransferase; AltName: Full=Farnesyl diphosphate synthase; AltName: Full=Farnesyltranstransferase; AltName: Full=Geranylgeranyl diphosphate synthase; AltName: Full=Geranyltranstransferase
LYa_b1_contig_436195 (90..576) consensus	-7132.66	0	GGGACATTGAAAGCAAAGCCAAAAGATCTTATAAAAACACATATGCAAAATTAAGGCGTAATCGAACGTTTTTTTCTTGCCAATTTATTATTTCTGATAATATTAAAGCTGTTGAAAAACTAGGTGGATTAACTCAAATCATAACTGTTAAAGTCATTCGTTGTGGCTAGTTTGTATTGTTTGCATGTATTTTGATATGATAAAATTTCGTCAATAACACCATTTTGTGCATCCGCACTGTCCTGTTCTAGTTCGTATTCCCTGCTTGTTCCTTTGTTGAAACATCCGTTTTCCCGTTTGATCCCGTTTTCTTTTTGTCCATCTCCTTGTTTGTAACAGTAGGATCATCGCTTGGTATTATGCCTTTATTAGTGGAAGCATTCTTTTGAATATCTTTAG…	5.05172	A0A0R4IBK5	RecName: Full=E3 ubiquitin-protein ligase rnf213-alpha; AltName: Full=Mysterin-A; AltName: Full=Mysterin-alpha; AltName: Full=RING finger protein 213-A; AltName: Full=RING finger protein 213-alpha; AltName: Full=RING-type E3 ubiquitin transferase rnf213-alpha
LYa_b1_contig_410303 (1..1900) consensus	-4864.06	0	ATGTACCAGGATTTTCGCAAGTATGACCACATCCATTGTAGCAACATTTCCTATTCTTACAGTCAGCATCATCCGCACACTGTTCAACGCATACACTTAGCAAGTTATGCGGTTTTGGGCAACTGTTGGATGTACCAGGATTACTGCAAGTATGACCACATCCATTGTAGCAACATTTCCTATTCTTACAGTCAGCATCGTCCGCACACTGTTCAACGCATACACTTAGCAAGTTATGCGGTTTTGGGCAACTGTTGGCGGTTTGTTTGTTCAGTTGACATTGCCGAAGAAAGCATGCCTCTGTAATGTCATTTTTCCCAATGCAATATCGTGAACGGCTGTTTCCTTTACATTGCTTGAATCGTCTTTTTGTTCCTTGTCCACATGTAGCTGTGCATT…	1.451e-46	Q9NJ15	RecName: Full=Proprotein convertase subtilisin/kexin type 5; AltName: Full=Proprotein convertase PC6-like; Short=aPC6; Flags: Precursor
LYa_b1_contig_383818 (39..966) consensus	-4802.59	0	CGTCAATTTACTGTACCTGTTCATGACAGTATTGACAGAAAGATCACTGATATCAATCATTGTAACAATGAACTTGACCTACATTTTATTCCTGGCTGTCGTGAGAGCTAATATTATGAAATTTGATTATCACATACTTGAAGGAAAGGCCAGATTTACAGAAAATATAGAAACAAATCTTGGAAGAAATATTGTTCAAATCCACACTCCAGCCCATAATGATGTGTTGGAAACATATTTGATGCAAGATTTTTCGATAGGCAAACAGATAACATGCTATCCATCATTACATCACTGTAGACTCAGAGATATTAATAAGAAGACTGCTGTAGAACCAGGTCTGCTGACCATGTCGTTTATCCACAGTTGGAACAATGGAAATGACTGGATATCGGATGT…	0.212953	P24322	RecName: Full=Geranylgeranyl pyrophosphate synthase; Short=GGPP synthase; Short=GGPPSase; AltName: Full=(2E,6E)-farnesyl diphosphate synthase; AltName: Full=Albino-3 protein; AltName: Full=Dimethylallyltranstransferase; AltName: Full=Farnesyl diphosphate synthase; AltName: Full=Farnesyltranstransferase; AltName: Full=Geranylgeranyl diphosphate synthase; AltName: Full=Geranyltranstransferase
LYa_b1_contig_107681 (8..8225) consensus	-4525.26	0	CGCAAATACTTAAAGTAACTAACCACCGTTATGCAGCTCCTGGTTATGTGATATGGTGTATGCCGTAAATAAATTAATATGCAAAGTTATCAAGGTATCACCAAATGAAGTATATATTCAAAAATGACAAGCAAGAATTTACGAGGAAAATTCATGTTAGTTTATTAATGAATGCCTCATAGAGATAGGTGAGCAAAGATATGGAAAAAGAGGACAATATCAGTAAGGACGAACAGTCAGGAAATGCTGAAAATGAACAAAAGGACGATGGGAATCTCCATGATCATTTGAACCAGTTTGGGAACCAGAAAGAAAAATGGATTAAAGTACTTAAAGAAAATTTTAGTGTGACATGTGTTACTCAGCTGCAATTTTTGTCAAAAGATGAAATAAAACAAA…	0	Q7Z2Y8	RecName: Full=Interferon-induced very large GTPase 1; AltName: Full=Interferon-induced very large GTPase pseudogene 1
LYa_b1_contig_422224 (59..1258) consensus	-3942.12	0	GTTATATTCGATTAAACTTTACATTTCAATGGGCAATATTTGTTAGATAAAAAATATTACAATATAATTTAAGCATGAATCGTTGTTTTCAAGTCAAATATTATGCTTCCTTTTTTGTTGGTTCTTTGAATGTATATATTTTAATGAAACACAGTCAGCAAACCACCGTCTAAGAGCATGTCTGAAATCGATCGTGGGATCCTCTTCACCGAATATAAAAATAGCGAGAAGCAACTAAAATATTACTGCTATAAACATATACAAGTACGGAATACATATACAAATATGATAACTATTTGACAAACGCTAAATATGTATTACAACTGCTACTGTATGTGTCATTGATTTTCAAATTCAAGAAAAGAAAGGTTGAAATGATTTCAATAATCTCAATTAATA…	3.601e-14	P55865	RecName: Full=Caspase-1-A; Short=CASP-1-A; AltName: Full=Interleukin-1 beta convertase homolog A; Short=xICE-A; Flags: Precursor
LYa_b1_contig_44403 (1..834) consensus	-3112.51	0	TAACCAAGTTTATAAAGTTATGTGAATGACATCTTGTAATGGGTCCTCCACAACTCTTAATAGCAGCAAGATGGCAGATTACCAGCATGAGAGAAGCAGGAATGTCGCTTAATAACCGTTTCAATAAAAGATGTTTTAATAATAACAATCAGGCAATACACGATTTTAAAGACCTTCAGAGATCAAAAAGACACCATATACCATCTGCTAGGGAAAATCAAGCATAATGCAGAAGGAAACCCGATGCATACAATACAATCATAAAAAGAGAGTGGTGGGCATACAGGAACCCTTTAACAAGAACTGTTCGAGATCAATTCATTGTTACTGGTTATCGTGCGATAAGACCATTTCGGGAACCTTTGCTTACGAACAAACACACAATTGTCCGTATCCAAT…	6.47243	B2JGX6	RecName: Full=Leucine--tRNA ligase; AltName: Full=Leucyl-tRNA synthetase; Short=LeuRS
LYa_b1_contig_117263 (1665..2386) consensus	-2776.45	0	TTATATTGTTTTGCACAAACAATGAGCAGAGTACACACGAAACTAATATAGCTATATATAGTCTTCTCTTATACTGCAACTGTTAGAATTGTATTGTTCCAAAGAAATACATCAATTTTGCATTGAGGCGGAAGACACACAACCTATTCTCTACTTGTGTGTCCTTAATAGTTGAATTGATTTGTTCTACTTCTCTCATGTTCGTATACTCTTCCCTTTACTGAAACCTCCTCATTTTTCATTAGATCATCAACGTCACCTAGACGTGATGGGTCATGATTTTTGCCTTCGCTATCTATCCACCTTTTTTTTTTTTTTGCATTTCGGACATAGCAGTTCTTGTTGACGATCAATCCACTTCCGGTTTTGGTCGGCATTTTTCTGCATATAGGTTTTTCA…	1.59403	O36383	RecName: Full=Gene 34 protein
LYa_b1_contig_349460 (1..555) consensus	-2641.18	0	GAAATGGCCAACATTGTCTTTATCAACCTACCAGGAAATGTTTCACATTTAAGTGTTATCAACGGTCAATTAGGAGTTACACCAGGCGTAGCCAATGCCGCACAACAATGGCAGTTGAATTTTGTACCCGGTGGCGGTAATAATGTGTTTACAATTCAGCATGTGGCAGATGGTAATTTTATCCAGATTCAAGAAGGTGCAGTAAATTTGATTGCCAATCCTGGTGTCAACTGCCAACTTACTCTGAACAACGGAATTGGAAATAACACAACTATATCGAATAATAATTTTGATATACCTGTTTCGATGCAAGTTGTAGGACACGCCATCCAACCCATACAAGGAGGAAATGGACAGGCATGGGACGTTGTTCCTGTGTAGTGAATAACATAACTTAGC…	0	not available	not available
LYa_b1_contig_436191 (90..504) consensus	-2554.54	0	CACAATTAAAAGAAAAGATCATCTTTTTGTATATTTTAAAGTGTTGATGTTCGATTTCAAATTCAAGAAATGCTCCTGTTGCTCTTTTGGTAAAATAGTAAATTCCTGTCCAAGGTTCATGCTTGATTTTGCTTGTATCACCTCATTGGTATATTTTTACCAAATCGTTTGTGTAACCAATACAGGAAAACAACAGTTAGGCCACCAGAACTGCACGATCCAGCTGAATCCGGTTTAGTTGACTTAGTACTTGAACATCTTAGACCTGGTCTTCCTTTTGCGATATTAGTCACCATGAGTGCTGTGTTACCACGATTGATTAATAATCTTGCAATATTTCTGACGATCATGTTGTATGACTTGTCGAAGTTGAAACTAATTTGAAGAGCTCTCTGTGTG…	0.604298	Q59WH7	RecName: Full=Adenylyltransferase and sulfurtransferase UBA4; AltName: Full=Ubiquitin-like protein activator 4; Includes: RecName: Full=Adenylyltransferase UBA4; Includes: RecName: Full=Sulfurtransferase UBA4
LYa_b1_contig_42059 (1..2728) consensus	-2518.92	0	TCAATCACATTGACACATGTTTACCACAACTTGATAGATTCCAGAATATGAGAATAGAGGAACTGAGGAACTTACAGAAAGAATATCAGCTGGAGGTTAAGGAAGCTGGATTACCTGCTCAGGTAAAAGAATTACCAGAAGATGAGAAATTTTCCTTCCTACAAAACTCTTTTTTAGGATTAGAAAACACACTATACGAACTCGAAAAGAGTACACTCCTGAGGGACAGCAAAGGCAAAGTGTCTCTGCGTGGATGCGAAAACACGTGGAAGAGTTTCAAAGATATCAGTACTGTGTATAGCAGAGTGTTTGAAACTCCAAGGGGTTCAGAACACTTCAATGATGATGCCAGTTTCGGAAGACAACGACTAAACGGCTTGAATCCGTGTTTAATAAAAA…	8.514e-84	O16025	RecName: Full=Allene oxide synthase-lipoxygenase protein; Includes: RecName: Full=Allene oxide synthase; AltName: Full=Hydroperoxidehydrase; Includes: RecName: Full=Arachidonate 8-lipoxygenase
LYa_b1_contig_422263 (45..1087) consensus	-2447.27	0	TATTTTATAGTTCTCAAATATTTATAATAAATATCAATGAAGGAAATTAGCAACTAAATACAATCAATTACAACACCGTTATACTAACAATGCAAATTGTTTGTTAATGTGACTTTCCCCTCTGGTTGAGATTAATTTACTCTTCTAATAGTCCAAGGAAACCACCATTGCCTTCGTCGTTATGTTTGTCTTTCGAGTGATCATGGTTAGGTGGATCTTGGTCGGATGGGGGTCCGTCTGTGGATGGTTCATTTATGTGAAGTCTGTCCTTGGTTTCGTCGTCTTTTGATGGTTCCTTTCTGAGTGATTCGTTGGGTGGTGCGTTGTCGGGTACTTTCTCATTAATTGGTGCATGGTCGGGTGCTTTCACATTTGGTTGACCTTGGTCGACTGTATTTT…	0.0203315	Q8IID4	RecName: Full=Dynein heavy chain-like protein PF11_0240
LYa_b1_contig_392828 (14..378) consensus	-2150.36	0	CAAGAGAAATAGTTTAATGATTTGAATTACACATATTTGGAAACACAGTTCAAAATGGAAGATTCAACTCAATTTGTCCCTTCATTCTTTTACAGCTTTCACCAGGTCAGCTAAGCAAGTCTTTTTTTCTTTTGTTACTCCAACTACTTCATGGTACACTAGTTTTAACGTGCCGACCAGCCCAACAGTGGATACACCACAATACCATGCATACGGATCTGTTGCTAATGACAGACCGGCCTGGGCAGCGCTAGACATATTCCTGCAACCACTTTGTATCATTCTTGGTTGCATTATTTTCATTCCAGTTGACCGAAGCATTTGAATGCTCATTATGATTCTCTTAAATGTATTCCTGTTTGTCC	1.02481	Q9PIN2	RecName: Full=Zinc transporter ZupT
LYa_b1_contig_422214 (1..1495) consensus	-2051.51	0	GCAACATTTCCTATTCTTACAGTCAACATCGTCATCACACTGTTCAACGCATACACTTAACATTTTTTTCGGATTCGGGCAACTGTTGGATGTACCAGGACTTCTGCAAGTATGACCACATCCATTGTAGCAACATTTCCTATTCTTACAGTCAGCATCGTCCGCACACTGCTCAACGCATACACTTAGCAATTTTTTCGGATTTGGGCAACTGTTGGCGGTTTGTTTGTTTAGTTGACATTGCCGAAGAAAGCAATCCTCTAGATCCGTATTGTCATTTATCCCAATGCAATATCGTGAACGGCTGCTTCCTTTACATTGCCTAAATCGGCTTTTCGTTCCTTTTCCACACGAAGCTGTGCATTGTTCCCAGCCAGACCATTGACCCCAATATCCAAG…	2.107e-45	P51559	RecName: Full=Endoprotease bli-4; AltName: Full=Blisterase; AltName: Full=Blistered cuticle protein 4; Flags: Precursor
LYa_b1_contig_436209 (198..1348) consensus	-1925.59	0	TAAAAGGGTTTGGTGGAAAAAGAAAATTACCAGAGCAAATACAATAGTTGAGTCGATAGACCTAAATATGGATAGTTTTATTTGTGTGCCTTTATGACAACTGCATCGCCAGACTGAACAATGATATGATTCTATATTAAAATTAAAAACAGACAGAACCGTAAGACATGACAGCTTTATATTAATTATACAGATGAATATAAGCTGAGTCAGTAATATACTAGTTATAAAATATAATTAGAATCAAGGATTTCCTGACATTCGCTTATTTTGATAAGGTTTGTGATCTTTTCTGTGAGCTTTCCTGCGGCTTTTTCTTTAAGAACTGCTTCGATTTTCTGCAGAATACTATTTGGATGTCGACACGTTCTTTTAATAAACATGAGTATGTGCCCCAAA…	4.33614	F4HX15	RecName: Full=Phospholipase A I; Short=AtPLA1
LYa_b1_contig_291665 (228..1167) consensus	-1900.11	0	GTTACACTCGACAGAAGGAATTAAAATACACGCATATTAATGATATCTATGCACTAGATATATTAAAAAATAGAGTGTGACATTTTTACTTAAAGTTTGCTTTTATTAACGGTTGAAGTGATCATATAATATGTATAGATGTTTTACATAATCATTAAGAACCTCTAAGTTTTTTTCGTATTTATTTTCATATATTTCAATTAAGAATGAAATATCTTTCTTTTGCAAAAACAACCCAGATGTTGCCACGTTTTACGTGTTTGCTAATTGTTATATACTTTGCTCATTTTGGCATTTAAGTCATATCTACTGATTAATTTATTTAAGCTTTAAGATTAACAGGAAAATCTCAAATAGATGTATTTATAAACAAACTATACAATGAAAACTGTAAACAAA…	0	not available	not available
LYa_b1_contig_386269 (1..2289) consensus	-1784.26	0	ATACCGTGACATAAAGTGCCACATACATTCTTTGTGATGGACAACATAGCAATAGTTTTAGCGGGAATTGCATCAATAGATGCAGCATATACAGTACAACATTATTCGTCGCAAGTATATCGTTGTGCATTCAGCTCTGCTACTTTAACATTGACCAAACTTCGGTTTATACCTCTAGGAATTCCACCCAAGATTCTGGAATATGGGAAAAGACTCTTGAGAACAGCTGCAGAGGAGTATTACCAAGACGTCGGTAAAAAAAAGATAGACGAACTCATAAAGCAAGAAAAAAGAAAACGACAACAAGAAGAGGAAGCAATTAAGAATGTGGATAAGACGAAAGAAAAGAAAGAAATAGGAAAAACAGAAGAGGAAAGAACACGATTAGAAGAAGAAGCA…	4.39677	Q06342	RecName: Full=Basic juvenile hormone-suppressible protein 1; Short=BJHSP1; Flags: Precursor
LYa_b1_contig_381520 (24..568) consensus	-1660.3	0	GTTTATTCAAAAGGTACAGTAAATGTGTTTTTGCAATCGAGTCCTAAAATAGAAGCATCAAATTCCTGCATTCTCAAAATTACAACAAGAAAATTAGAAAAAAAAAAGATATTTTGCAAAACATGATCGTGTCGAGGTCAGATTCTGGTCTTCATCATAATGATAGTATTATTGTTTAATACATGCACCACCAGTAGCTTTGTCGTGTTCCACTTTTGAAAGAAGTCCATCCTCATCAATATCAAGGGCTCCGAACGCTTTGTCGATGAGGAAGTCACTATCGGTACTGCTACAAGCTGCTGCAAATTCTGATATATTCAGTTTACCGTCCTGATCAAGATCGAATGACTTGATACTACACGCACAATTGATTCCGGGAAGAACTGACAGATCTCTTTT…	0.0270443	Q9LE22	RecName: Full=Probable calcium-binding protein CML27; AltName: Full=Calmodulin-like protein 27
LYa_b1_contig_422304 (20..501) consensus	-1550.55	0	TTTGAATATTTTTATTAAAATGGAATGTTATGGATGTAAGGTAAAATAGCAACATACACATATATCACACATATATCACACATATTAGTGTGTCTAGTTGCTATTTTACTTGAGTGTATTTCAATGTTTGCTTCATGAATTTTGTTACATATATGACAACAGCGTATGGTCATAGAACTTGCTGTTTTGTTTCTCAGCAATCGTCATATCCGGAGCTTTTTTTTTAGTCCATACAAGCCTGCACCAGCTGCTAAAACTGCAGACCAAACATGTGTATCAAAAAGCATTGACCAGGTTCTTGTTTCTTTTTTGTTCCAGTAAAGACGTTTAGCTGCTAATGATCCTTTACAAATACTTTTCCTTGATGAACCCTGTGCTAATCTCCCAATCGTTCCACTG…	1.48868	P43117	RecName: Full=Prostaglandin F2-alpha receptor; Short=PGF receptor; Short=PGF2-alpha receptor; AltName: Full=Prostanoid FP receptor
LYa_b1_contig_19228 (1..379) consensus	-1435.79	0	CATTCAAAGCTTGTCTAGTGGAATCCAATCTTTCTTGTAGTACTCTACGGTCATGTTCACTACTGGTGAGTGCCCTTTGTAACTGTTGAATACGTTCCTGTAACTCATTAAGGGCAGCATTGTTGTCTGATAAGGACATGTTCAATGACTGTACCTTGTCCTTTTGTTGAATACCATCCTCTTCAGTTTTAGCCAAGGTGAGAGACAGTCTGTCTACAGTTAACTGTAAGGACTGGGCTTTGCTGTCTAGGTTCTGTATCTGTTTGTTCAGAGTCTCTACTCTGTCTGTCAGGACCAGATTTTCTGTTTCTTTATCGTTCATCAATAGTTTGAACCTTTGCAAGTCACCCTCTAGAGATCTACGAGCCAGTTCTAGTTT	6.972e-30	Q5TZA2	RecName: Full=Rootletin; AltName: Full=Ciliary rootlet coiled-coil protein
LYa_b1_contig_422291 (55..979) consensus	-1389.26	0	GTTTCAACAGATTGTTAGAACAAATATACCGTTATTCCAATAGCATTGTGTTTATGATATCCTGTTGTCTATCAAGTTCATCAAGTGCTTCTTTGCTTAAAATATCAAGAAGGGTTTGTAAACTTGGAGACTTTTTGAGATGCTTATAAACTAACGTTTTGAGCTCTTTCATTGACTTTATGACGCTTTCACTATCCGATGTAACCAATGCCACGTCGCTCACAGTCATATATTTCCAGGAAACATTCCTTCGAATCTTTGCGTCTAATGTGTTAGCATCATTGTGAACTTTTAGAAGAGCAGCAGTCATCGTTGCAAACACTGTTTCAAACATCGCCACCAGTTTTACAGAAACTCCTTCGAGTGTGATGTTTTCATCTTTGTGATTGTCAAACCATG…	0.314406	Q96QD8	RecName: Full=Sodium-coupled neutral amino acid transporter 2; AltName: Full=Amino acid transporter A2; AltName: Full=Protein 40-9-1; AltName: Full=Solute carrier family 38 member 2; AltName: Full=System A amino acid transporter 2; AltName: Full=System A transporter 1; AltName: Full=System N amino acid transporter 2
LYa_b1_contig_399299 (43..2127) consensus	-1352.95	0	GCACACTTTCTTAATCCAAAGAGTAAAGATCTGCTGAGTGACCATCCCAACACTTAGCTTGGCCATCACACTTGTGTATTTTATATGTATGTGTGTTTGCGTCAAAGCTTATCTCAAGTTGATGAGAATGTGAGTTATCGGTCGTGGTTCCTACTGTTACTGTCAGGCCTTTAGCCAAATCCTGCATGTCCTCATAGTCAATATAAAACTCGTGGAAATGATGACCAGGTGGGTCTTGGTTGGTGACAGATGTTCGGAAGTGTGAGTCAGCTTGTGTTATTCCAGCACCAGCAAGTGCACTTGGTTTTTGATCAAGATATCCACCCAAATTTTTCAAGTGATTCAGAACGTCTTTAACCGCGTCAAGCTCCTTTCCAATCTGGTTACCTTCTCGAGTGA…	0.290822	A2C7T6	RecName: Full=Light-independent protochlorophyllide reductase subunit N; Short=DPOR subunit N; Short=LI-POR subunit N
LYa_b1_contig_182883 (1..809) consensus	-1344.47	0	GAAAGAAATAATGAGCGTACCATTAGCCCGGTTATCCGGAGCAGTTATCAAAAATGGAACAATTCGGAGCATTCTAGATAGAAAAATTGTGAACAATGTGTTACCAGGTGTCAGACAAAGTTCACATGAAACCTGGTACGCAATCCTGACCGAGCCTTACTTTTGGTGTGCAGGTGGTTCTTTTGCTGGTGCAGTGCTCTGCACGATAGATTCGTGGTGGCGAAAGTAGACTCGGATGAATACGACATTTGAAAAATATGATGTTAATGTTTCCAGTTGTTTTATCTGTTTGAATATTGTAATGATGTTTAATAATAAATGAACGGTTACGTCATTTGCAAATTGCATATACATCATTGTACATGAATCAAAAAAAAAAATTCAAATCTTGTCGATCTT…	4.40702	A8T644	RecName: Full=Proprotein convertase subtilisin/kexin type 9; AltName: Full=Proprotein convertase 9; Short=PC9; AltName: Full=Subtilisin/kexin-like protease PC9; Flags: Precursor
LYa_b1_contig_137152 (455..2216) consensus	-1195.83	0	ACGTTGGTTAGATATTTATAACAGAGACAGCATATATGTGCTTTTTTTAAAAACAACAAAGACATGTGCGATTATGAACTGGTACTATTCTAAAATTTCACATACACACATACAAATCTTGCATTGACGAGTTTGCAAAGAGCGTCAATTTTCGTTAATCTTCTTCTGTGTCACTATTTTGTTTGTCTTTATCTCCAAAAATGATTGGAAATTGAATAAAATGATCGTCATAATCCTTTAACCATCTTTTAATTCGTTCATTAATTTCGAATCTGTTTGTCATACAAACGGCAGGGTCAGCACTGAGGTCTGTGCTGTAATATATTGTGTCGACCACAATTTCTCGCATCCGTGCTATATACTTTGAATTTAAACAAGCCGCATATCGAATGTCGATGT…	4.62331	Q4WA22	RecName: Full=Dicer-like protein 2; Includes: RecName: Full=Endoribonuclease dcl2; Includes: RecName: Full=ATP-dependent helicase dcl2
LYa_b1_contig_429875 (1..261) consensus	-1192.54	0	TTTTTAATTTCAATTTCAATTTGGTATTGCAATATTCTTTTCCATGTGTATATTTTGTTGTCGTAGAGTGAGTTTTATTTAAATAAAACTTTTTTCAAGCCGATCATGGCTATATAGGATGTTAAACCTGCACGGAAAACATGACCATCTGTCACAAAAGATCCCAACTTGGCAGCCTTGTCACGAAATGACGATGAAAGATCCACTTGTACACGTTGCATAATGATCCTGAATGCAGACAATCCTGCATTTTGATACGTC	0.47535	Q08306	RecName: Full=Polyphenol oxidase D, chloroplastic; Short=PPO; AltName: Full=Catechol oxidase; Flags: Precursor
LYa_b1_contig_323040 (1..233) consensus	-1168.94	0	ACCAAATGACGGCGACGCTAGGCCTTCATGGACTTTGACTGCAGATTCGCACCTTAAAAATGTTCATGCGTCTGTATCTACAGAGGGTTTAAGAGTAACCGGAGGTGACTATGAATATATCGATGAGAGATACAATCATAACAGATTTAAGCACTCTCACCAAAACACACACGTACATCACGAAAGGGATGGCTCCACCACAGTTAATGTTACACTCGACAGAAGGAATTAAA	0.158361	P70705	RecName: Full=Copper-transporting ATPase 1; AltName: Full=Copper pump 1; AltName: Full=Menkes disease-associated protein homolog
LYa_b1_contig_349932 (179..744) consensus	-1103.63	0	GTTTCACTTACAATACACTGAACAACATATTTACATAAGTTTTCAATTTTTCATTTCAATCCGGTTTTTCTTCTTTGAATTTTCACAATAAGAAACTGAATCTAAATTCCGAATTCCTGCAGTTTACAGTGATTTAGTTATGTCTTGGGATGATGACGATTTCGTGTCTGTCCATACTTTGTTTAAACGCATTAAAGACAGTTTCTCCGTTAACGCCTTCGTCGGTTGGCAAAAACACTTCAGCTATCGACGAATTTCCATTGATTTGTCCATTTTTTTGGATTTGATAGTTTGCAAATGGTCTTCCTTCGTAATCTAATAAACCTTGAAAGTCCAGGCGAAATGTTGGAGGTTTTGTATTAGCGTCTGATTTTTTAATAGTGCGGTCTCTTGCACCAA…	3.78044	P96645	RecName: Full=Probable endopeptidase YddH; Flags: Precursor
LYa_b1_contig_1235 (39..877) consensus	-1068.86	0	AATGTATGTAAAATAACAAATGATTAATATGATGTTTTGTTCATTTCAACAAAAACGAAAAACACATTTTGATAAGGCAAGCCATTACAATTGGGTTGTTTGTTTCTCAAAAGGGGTACACAAGGTATGAACAGTGATAAATATAGATCTGTTTATTTAGCCGGGTTACACTTCCATTCGACTTTAACTCGTTGTTCCATGCACGTCCCATCAACAAACGCCATCGTCGGTCCTTCAACAGAACACTCTGTTTTCCCATTACAGGCAGTCTGGATATCAGGTGTACATGGTGAAGGGTTACACACAGGTTTCGTAATCTCAATCTGGGTATCAGTTGGACAAGTTATTTCTGCAGTTTCTCCATGAAGGGCAAAAGCTCTGTTATCTTTGCATTTATAT…	0.0001425	G5EDW2	RecName: Full=Latrophilin-like protein 1; Flags: Precursor
LYa_b1_contig_436271 (28..346) consensus	-1062.65	0	TAATTTTGTAATTAATGTTCAATTATACATAAAACAAAAAATGTCAAGGGTCTCTTGGAGGAGACTCTTCATCATTTGATGAACGACCTTTGACAGTCGTGTACAAGTGGTAACATGATATAAATAAATACATCAATGCCTCAGTTGCTTCGGCAGCATCTTTCGTTCCTAATAATACATTTTTAACTCTTCCTCTCCTCTGATGGATCGAACTTCCTTTCTGATTTATGAAATTAGTTGCTGCTAAGCGTACAAATTTCGGCTTCATATAATTCTCTTGTGTGTATTACGTTTTGCTTCAATGTTTATTTGACTGTAT	3.3913	Q15UB5	RecName: Full=Ribosomal RNA large subunit methyltransferase K/L; Includes: RecName: Full=23S rRNA m2G2445 methyltransferase; AltName: Full=rRNA (guanine-N(2)-)-methyltransferase RlmL; Includes: RecName: Full=23S rRNA m7G2069 methyltransferase; AltName: Full=rRNA (guanine-N(7)-)-methyltransferase RlmK
LYa_b1_contig_406412 (131..1008) consensus	-1043.82	0	GTTGCAATTAAAAATAATAACGATGATAGACAGACATATTTGCGAAAGTTAGGTTACTTTTTCTAAACTCAATAGACACAAATTAAACATGTTTACTTACAAAACTCATTTATGCAAATGTACTGTGTTTAATAGATTGTTCTATGAATGTTATTGCATAGGTACAGGCACACAATTGACAAAACAATTTCCGATTTTATATCCATTCACATTTCTTTTATTTTTTAATATGTGATAAAACTCTTTTTCGATTAACTAGTTAAATATTTTTATGTTATTCAATCTGTCTTATGTTGAAAGTTTTAATGGAGGTTCAAATATATATCACGGATAATGAAGGTAGTCCAATAAAAATTTGAAAAGCAGACAAATGTAAAAGATAACTCGGAGTTCATTCTG…	2.50497	Q479I3	RecName: Full=Glutamyl-Q tRNA(Asp) synthetase; Short=Glu-Q-RSs
LYa_b1_contig_429878 (1..1025) consensus	-942.735	0	TGGTGGAGTTGATATGTCTGGTGGTGGAGTTGAAATGGCTGGTGTCGGATAAGATTTGGTTGGTGATGGAGTTGATATGTCTGGTGGTGGAGTTGATATGTCTGGTGGTGGATCAGATGTTTCTTGATGTGAAGTTGATATGTCTGATAGTGGAGTTGATATTTCTGGTGGTGGAGTTGAAATGTCTGGTGATGGAGTTGATATGTATGGTTGTTGAGTTGATATGTCTGGTGGCCGAGTTGATATCTCTTGTGGTGGAATTGATATGCCTGGTGGTGAGGTTGATATGTCTGTTGGTGTAGATGACGTGTCTTGCGGTGGAGTTGACATGTCTAGTGGTGGAGGTAATGTTTCTGGTGATGTATCTGGTGTTGGAGTTGATATGTCTGGTGATTGAGT…	1.15799	B1GT62	RecName: Full=S-layer protein B; AltName: Full=Surface layer small protein; Flags: Precursor
LYa_b1_contig_422234 (106..955) consensus	-939.014	0	GTCAATCTTTCTGGTGTTACATTATACTATGTGACATCTAATTCCGGAGAATTACCTTCCAACTATCTACCTTATCCCTGCTGATTGGAAATGAGGCTAATACAGAAAATTTAGTTTTCTTCTCATCAATAAACGTTGCCAAGGATTCAAATGTTGTATTTACTTTTACGAGACCCGATCTTAAGGCACCAATCCGACTGTCAGTCATCGGCTTTTTCTCTTTATTGTTTCTCTCAACATCCGTTGCAAGTCTTTTCAAATTTCCTATCCCAGCAATAAGGGGCTTCATAGCTTCAGCCAATAAACCGGAATCAACAGGAACTGAGAATCCGTCGAGGTTCACGTAATCATTGCTGTGATCTTCAAGCCAACTCTTTAGAGTTATCATTAGTTTTTGCA…	0.571145	Q72LS5	RecName: Full=Recombination protein RecR >gi|56749658|sp|Q8EY84.1|RECR_LEPIN RecName: Full=Recombination protein RecR
LYa_b1_contig_422283 (383..1054) consensus	-930.757	0	GGTTGAAAGTTAAGTTATTTTTTATTTATTGACTGTTCTGGTGTTGGTATCTTTTATCTCTGACATAAAATTATATTTCTTTTTTTTATTTTTATCTCCAGTCTCCAGGCTGATATTCAAATTCCCTCCAATTGATTAGTCTTTCAGTACTGACTTGTTATCCTAATTATCTTCATTGCGTTTCATCCTCTTGTTTTTCTTAAATTTCTTGTTTCTTGTGCTGCCGATAGTTTCAGAAAATGTGTTTTGTCTTCCTTTATTCTCTCCTTTATATTCTCATCCAAGTTGTCATTTGCATCCCTTTTTTCAGCTTTATCTCTTTATTGCATCTATGCTCCTCGTAGAGGCAGTGTAGCTTCTCCTACTTTGTATCGGTATTTACATTCATCTTCTGCTATA…	0	not available	not available
LYa_b1_contig_391054 (344..803) consensus	-927.023	0	GGAGAGGACATCTTCCGGGAAAATGTCATTTTATATATACTGTATAACGTTAAAATGTTTCGATATCTTGGAGAACCACAATCATAATTTTTTTTTAGCACAAAATGAAAATAAGAGGTTAGATAGAAAGTCTTTAAAACAACAAAAGATTACAACAGTTCAAATGTCCTCGATTATTTGAGTTTAACGGAATGGTTGATTAATAGTCTCTTTGCACCGTGCTTTGGGGATCCATACCATCGATAGAAGCAATAAATGACAAATGCTCCAAAGCCAATATCACTACCATCAGTTAGGCCAAATCCATTACTTGCATATCTTACACCTGGTTTCCTTTGGGTGCCATTCGTTTTTGTTGCCTGACGCATACCATTCACAAGTAGTCTGTTAAATTTTCCA…	0	not available	not available
LYa_b1_contig_106540 (269..1290) consensus	-915.234	0	GGCCAATCAAAACAAATACAATAATCATAACAGAATCAATAGGCAATTCGACGGAGCAGTTAAAAGACAAAATAATACAATTGTTATTCTTGGTCTAATCACATTTAGAATTTACATTGATTAACTTTTCATTTGCATCCTCCGATAGCAAAACCAAACAGAAAAGATTGATCCCCATTTGAAATTTGGCAGGTATTTCCAAATCATCGTTAATTAATCCGTGACAGGGAATCTTCGTGAAAGCTGCACCGATAGGGTATAAAATCTCTTTGTCTGTTGGTTCAAAAGATAACGTGCCAATAGTTCTAGGACTATACTTTGATTCATGCTGATTGTTTATAAAGAAATACAAGCATGCGCCATCACCCTTTTTGTTAGCGTGTTTAATAGCTACTCCAA…	2.31319	Q8MKW7	RecName: Full=Ribonuclease Z, mitochondrial; Short=RNase Z; AltName: Full=Juvenile hormone-inducible protein 1; AltName: Full=dRNAse Z; AltName: Full=tRNA 3 endonuclease; Short=DmeZ; AltName: Full=tRNase Z; Flags: Precursor
LYa_b1_contig_399440 (70..1392) consensus	-894.675	0	TTTTTCGAAAAATAAAATCAAACTGCATTATTTACAGAACAGGAAAACAATATTTCTATGTCTTTACTTCTATAAGACATGCCGCACTAGAACTCAGTCTGATATAAAAACTTTCTGATAGTTATCTGTTTTTACAGCAGACTTAATGATACAGTTTTGGTGTATTCTTCAACACTATCAACCCTAAATAAAGTACCAAGAACATACAAACACTCTTGCTCATCATGTGTAGAATACGCCTCAATTATTCTTGGACGATAAGAAGAATCGTGTGAATTGTTAAAAATAAACAGTGTACCAAGTTCATGGTCATGATTGTTCTTGCGAAATCTTTCAGCTGTTGTTTGGAATCGACTGCAAGAAACCATGGTAGTGAACATTATCTCTTCTCCTTTTTGG…	0.336182	P15261	RecName: Full=Interferon gamma receptor 1; Short=IFN-gamma receptor 1; Short=IFN-gamma-R1; AltName: Full=Interferon gamma receptor alpha-chain; Short=IFN-gamma-R-alpha; AltName: CD_antigen=CD119; Flags: Precursor
LYa_b1_contig_412344 (83..790) consensus	-886.116	0	ATTAATATCACGTTGGCAGATACCTCATTTTTGTCCACTCATTGTATTCTATTGGTTTTAAGATCAAATTGTAAAATGAGAAAGAAAAATAAAGAATATACTTAAAAAAGGAAAACACAAAATCAAAAAAGCAAGCCGATATAACAGTTTAAAATGATAACAAAACATTCTGTATTCAAATGTTAGATTTAGTTAAAACATTTGGAAAACCTTGAATACATTACATTCAAGCAGCAATGTTCCAGGTCCCACCTTCATTTGGTCCTCTTACAACAGTTACAATTCTGCCGTTAGTGCCCAAAGAATACGATGTATCTGCATTTGCATTCTTTATTCTCGTTCTTGTTGCTATTCCATTAGTCAGTGTAAGATCGCAGTTTGCGTCAGCTTCTAGAAGCA…	1.6074	Q55FB9	RecName: Full=JmjC domain-containing protein B; AltName: Full=Jumonji domain-containing protein B
LYa_b1_contig_258697 (39..2033) consensus	-860.631	0	GCACAATAGTATATATTGTTTTTGGCGTAAAATGATACTAAGCAATTTTAAAACCTGTTGCGCAAACATAACATTGTGGAAAAGAAGTTGTGAAGCTAAAGTACGCATTTTTGGCGCAAGCGAATTTCTCCCCTATTATGTCTGAATGTTTTTCACACGTCGTTGTCAATATAATGGAATTTTATTCGACTTTCATACAAGTGAGATGTTAAGCCAGCTGGAAACTAGGTTTAATACACAAGTTTTTACATGTGAAAAAGCATATATTGAGTTAGGAAAATCAGTTGCTATCCAGTTGTTAGATGTGTTTGGGCTTTTGATTTTACTTTTGAGGAGAAACATCAGATATTTCAATTAAGTTGCTGGTTTAAAAGTGAGAAGATGTTGTATAATTGCCAA…	3.467e-09	A5PKB7	RecName: Full=GTPase IMAP family member 6; AltName: Full=Immunity-associated nucleotide 6 protein; Short=IAN-6
LYa_b1_contig_436344 (1..617) consensus	-859.037	0	AGCACAAAGAACACACATTTCACTTTGCCATCCACTTTGCATTCATATTTGCCAGAATCTTCAAGCGCTGCATTTGATTTTTCAAATCCAATATGTGGATCACCTTCTGAGGTTACCTTATTACTGTTAAATGTCCATTCTAGATTTGCAGAGTTCATTTCAACTCTCAGATCTATGATTGATCCTAAATCACACTGATGTAAATCATAAACAATCACCTTAAACGCTTTTATCGTTTTTCCATCCACTTTGCATTCGTATAGTCCAGAATCACTAAACTTTGCTGGATTCCGTTTTATATATGTGTTATAGCAATCATAAGTAATCGTTACAGGTGTATTGTTGCAGTACCATGTTGTCTTACTAGGTGTCACATCAAACCAACTGAAACAGATTGTT…	0.553174	Q60ZN5	RecName: Full=Protein sidekick homolog; AltName: Full=Neuronal IgCAM protein 4; Flags: Precursor
LYa_b1_contig_434477 (1..532) consensus	-853.567	0	TAAATAATTTCTAATATTATAGAGTTGAGTTAACAATATATCAAGAAATGACACTGGTTAGCAATCACGTGGTCAAGTAAGGTTATACAACTGAGATGAAATTCCATTTCACTCCACCTTGCTGCACCCAGGTAACTTGATTGCCATTGACTTCAAGAATTCTAGAATGGCAGCATTTACAACCTTCCTCAGTTATACTCGTGTTACTTCCAATCCCGTTGGTTAATTGGACGCTTGTGTGTTTTGCAGTTATGTCCGCATTAATCCCAACTTGACCTTTCGGTAAAAACTGCATGTATCTTTGAGTTGCAAGATGTAGGAATTTGTACACGTTTTGCCTAGTAGTTGGTATCAATTTCCATGTACAAACTGCGTTGTCTTCTTGGTTTGGTGGGGTCA…	0.175813	P43063	RecName: Full=Cyclin-dependent kinase 1; Short=CDK1; AltName: Full=Cell division control protein 28; AltName: Full=Cell division protein kinase 2
LYa_b1_contig_349531 (1..460) consensus	-825.349	0	GGAAGTTATCCGAATGTCTCGTCCAAAAGAGTTTGCTTTGAAAGATGTTAACAGCACATACTTCCTGCACGTGGACAGTACCGGACACGTTACCTGTGTACCAGGAAGACCATAAGGTACATGTTTCACCCTTCCAGGAGGCCTAGGAAAATCAAAAATTACGAATTTTTCTCTTCAACCTAAAATGACATTGTATGTCGACGCTAATTCATATAACGTCTCTGGAAGAAATGGACTTGAAGGACAGGAGTGGGAATTCCAACAGTAAATGCTGATGGTGATTGATACTGTTTCAACAATTGCAATATCGCTTAACTATAATATTAACTCTTTACAACACAAATTCAAGACTTTTCGCTTTATTTAATCTGACTTTTAGAGACATTATATTTGCTTAAT…	2.89244	P0CS84	RecName: Full=Uncharacterized protein C1348.15 >gi|385178671|sp|P0CS85.1|YP43_SCHPO RecName: Full=Uncharacterized protein CPT2R1.03
LYa_b1_contig_11135 (94..1883) consensus	-821.298	0	ATCAAGATAAAATTATCTGAGTGCAGGACTACAAGATGTCGTATTAGAGTGGGTTCTCCTTGATATAACGATGGTGAGCAGAGTTTTTGCGATACTTCAGACGTTAAAGAAAGCAACAGCGATACCGAGTACCAATGCAGATTTAACGAATTTTTTAATAGTACGATCAACAAAGATTCTAGTTGGTCTACTTGCTATACAGCGCTCAGTACAAGAGGAAAGAGATGCGCTAAAAGAAAAGCAAATTATAATTTTTGGCAAACGGGGATCTGGGGTTGATCTGGTGGGCAAAGCTTTACTTGCAAACTGCCAAAATGATGACGACGGATTAAACAGAAAACCATGCTTGAAAACAAATGGCAAACAAAATATATTGTCATCAGGAATTAAAGAAGTAGA…	2.75818	Q4L654	RecName: Full=Nuclease SbcCD subunit D
LYa_b1_contig_296179 (66..376) consensus	-809.051	0	GAAACGACGAATAAGATAAACACTTGTTGTTGCTCTTGAAAGGTACTACATATAGGAGTATAGAAATAGTATCCAACCTAAGTGAAAATATGTATATTTTGATTGTGTTCGCAGTTATTACGTCGTTCATTGCAGTAGAATGTAACGAAAGCGTAAAGACATACAGGGTTAATGTAAAAGTGCCCGGAGGAAGAATCAACGAGGATATAACTGTCGACTCAAAAGAAAATACTATGACTGTCAATCTCGGAGACGTATCTCATCTTAACAACTCATTTTGTCCGTCGATTAATCTTCATGACTTCGAAATG	0.0923636	Q29TV8	RecName: Full=Gastrokine-2; AltName: Full=Blottin; Flags: Precursor
LYa_b1_contig_380034 (53..474) consensus	-795.535	0	TTTGTTATCGTTCAAATATATTTAGAGATAATACAGAAGCTAAGAATTGCATCAAGTAAAAATTCATAGGTTTTAGTTAAAACAATGACAATAAATTGGAAAAACAGCAGATGTTGTAATAGGTCATTCACATGCGAATTTCGAAAAGTGTTGCATTAAACACTGTTCCTGCTTCTTTTATGGCCGAAATATCTCATATAAGCCACCTGCAATGAATACGTAGGACAATCCATTGGTGCTACTTTTCAAAACTGGTCTTTTCATGATATATCCATCACCTTTGACAAATAGTCCATGCCAATTCATTCTTAACAGCCTGGAACTTAATAATCTGGAACCTAACATCATATCCCCGTTTTAAATAACCTTGTTTACTGGTTTCTTCTTTAGTATGACAAG…	0	not available	not available
LYa_b1_contig_422313 (156..1059) consensus	-783.198	0	ACATTTAATTTTGAAGACGCTCCTCCATTCTATATATGTCAACAATGCTGAATATGTTTTGTTGAATCAATTGCGCAGCCATCGGTTGGTTTCTTTTTCCGAGAATATACCCTGCCAGTGCACCAAGTGATGTGGTTACTCTGACAAGCCCCCGTTTCAAAGTTGCAAGCTGTGCGTATGTGATCTCTTTGTCGTCCGTATTTTGCATTTCAATATCTGTGGCAAGTCTTTGCAAATTTCCTACCGCAGCAAAAAAAGGGAGCAAAATTCTCCATAGTGATCCCTTTTCAAGTTCCAAATCATTTTGCTGCTGTAGATTTTCAACTGGAATTGCAACTATAACTTCTCTGAATCTTGTCATTGCGGTGTTCATATCTGCCAAAACCAAGTCGTAGCTTT…	0.0289442	Q95327	RecName: Full=Beta-mannosidase; AltName: Full=Lysosomal beta A mannosidase; AltName: Full=Mannanase; Short=Mannase; Flags: Precursor
LYa_b1_contig_68825 (1..647) consensus	-716.255	0	ATGATGATATTTCGACAAATCCAACTAAATATGAAATGAAATCTTCGAAATCTATTTTCAACTCTAGTTTAACTATTAAGGGGTTCAACGTTTCTGACGTAAACTGTAAATATACTTGTGCATGTGGATTCGAGAAATTTACACAAATATTAAAGCTAGACGACCTTGATGTCGTGTATGGTGACGTCAAAGATTCGAGTAAGCTTAAAGACGATAGATTTATTGTAGAAGTTGAGATGAAAGTTTATCCAATACCAAACTGTTCCATCGTATACAAGGCCAAGGAATATAATGCATCAGTAAAGAAAGCGGGATCTGTTAAAACTAACAAGAATGTATCTGAACTGTTTACTGTTACAATAACAGCTGCATTAGACGTTGAACAAAGTGAACTCAAGT…	1.42522	B3G515	RecName: Full=G-protein coupled estrogen receptor 1; AltName: Full=G protein-coupled estrogen receptor 1; AltName: Full=G-protein coupled receptor 30
LYa_b1_contig_436201 (37..747) consensus	-709.174	0	ATTGATGCTGGTTACTTGATACAATTTTAAACATTTTTAAAATGGGCGTTGTGTGAACATAATTTAGGTAATGCATTACCGTCTCAAACCTTGTGTCCGGAAGACTTTATATGAAGCACAATTCTCCTACACTTTATGCATGTCCTGCCTTTGTTAATTAAGTAATACTTATTTATTTATTGCATTACACATTGTAATTTATTTTCGTTACACGTTTTTGGGATGCATTTTTTAAAATGAGTAATATGATTTCAGTAATATTCTTCTACTAATTAGTGTAAGACAATGAAATACAATTAAGACAATACTATGATAATGTCTGCACAGCAAAATAAAACATTTGTTTCTTTGAGTCATCCAGTAACATTTATTTCTTAATTTCTCCGCCGACCATTGGTA…	0	not available	not available
LYa_b1_contig_436218 (74..608) consensus	-691.136	0	CAATAATAGTAAGGAAAAGTAAACGATACATTTTGGCGTGAACATATTTTTTTTGTTATTTATAAAGACGTTGTAAAATTAATAGGTTAACGGAAAACTACACATAAACTCAAGCAGTTAAAACGTTTTGGAAAAAAAACCAACTACGATCTTACGTTCCGATATTCACACTCTATTAATGTTCCATACAGTGGAATGGGTTTGATCTGTTGAAATAACCTGTTGTCCTTCAACACCCAAATACAGATGCGGATTTTCTAGATTATTAACAATCTCTGTGGCATTTGCAATTCCATTTGTTAGAAGTAAATTGCAGCTGTTGTCACCAGCATTCGTAACCAAAGTTATTCCTCTTGCCGAAATCTGGAGAAATCTCCGATCAGTTTGGTGTTGTATTTG…	3.43445	E1UV19	RecName: Full=6-carboxyhexanoate--CoA ligase; AltName: Full=Pimeloyl-CoA synthase
LYa_b1_contig_436261 (1..233) consensus	-686.882	0	ACCAAATGACGGCGACGCTAGGCCTACATGGACTTTAACTGCAGATTCGCACCTTAAAAATGTTCATGCGTCTGTATCTACAGAGGGTTTAAGAGTAACCGGAGGTGACTATGAACATATCGATGATAGATACAATCATAACAGATTTAAGCACTCTCACCAAAACACACACGTACATCACGAAAGGGATGGCTCCACCACAGTTAGAGTTACACTCGACAGAAGGAATTAAA	0.208334	B8F713	RecName: Full=Putative 8-amino-7-oxononanoate synthase; Short=AONS; AltName: Full=7-keto-8-amino-pelargonic acid synthase; Short=7-KAP synthase; AltName: Full=8-amino-7-ketopelargonate synthase
LYa_b1_contig_429862 (62..1312) consensus	-680.688	0	GTACTTCATTCAGACAGCTCTTGGATTATCTCCTCTAGTTTCTTATCGTCGGCCATTCCTTGTTTCATTTTACTTATGAATGCAATTCTAGTTAGATAACCGTATTGTTGTTTTTCGTTCTCTAATTCTATTACTTCATTAAAGTACATTTCAACAGAGAAATGCTCCCTCTGCAAAGCAATTTCATTTAAAGATGAAATAAGCTCCTTGACATAATGAAGTATGCTTTGTAGCTCTTGCAGTGATGTTCGCAATTTCTTCTGTTCGCTTTCTACCATACTTTTGTGATCTTTTCGACCCTGTACAGCATCCTTATATTTCTTTTCAAGATCTTCTTTTGTTTTTGTTTCTTTTTCAAATACAGTCTCGTATTCAAAGTTTTGCAATTCATGGTGATCT…	0.002166	P54120	RecName: Full=Immune-associated nucleotide-binding protein 8; Short=AtIAN8; AltName: Full=Protein AIG1
LYa_b1_contig_227268 (6719..9813) consensus	-675.525	0	CTTCGTTCTGAGCTTAATGAATTGTGCAGAGGATTTAGTTTTTCTGGATTAGATCTAGAAAGAGAGCTGCTTGATCAAGAGATCTGCAAAAAGGGAAACTCGAAAGATGACATCATATTAGTTTTAACAAATGACGAACTCAAAACAACAACACTTAAGCAAGAAATAAGCCAGATCGAAAATGAATTAAAATGGTTTATATCCAGTCGTATGAAAAATTATCTAAATAGATCAGACATAGAAGCAGAACTCGACAAATGGAGAGATGGTTTAACTAAGTTTGAGAATGTTGACGTCGAACTTCAGTCACTTGCAGATAGTTTTACAGAGGAGCAACTGATAGGTCTTTGTGATGAAATGGTATCAATTAAAAATAATGGATTTGGTGATCTTATTGTA…	1.95319	Q3ZK65	RecName: Full=Non-structural protein 5; Short=NSP5; AltName: Full=NS26
LYa_b1_contig_82229 (1..2119) consensus	-672.193	0	GGAATATTGCTTGGTAAAAGTCTAGTGTACGGATACCGGGTAATGATTTGCGCATTCCGGTTTTGTGCATCGATTGCGTTGTTTCGATCTGTAATACGCCGTTCAATTTTGACCAATTCTTCTCTGAACTCGTTCAGGATTGTGATTGCAGTTGGATCATCAATGTATTCAACCTCAAAGTTTCCGAGCGGTTTAGTCGTGACTTGACTAAGTATTGTGAAAATTGTCATAATATCGAATGTTTCGTTGACTGATGGTAGACAATCTAGAAGAAATTTCTCATCTACTGGCTCCGTATTCACAGGTGGGTCTTTGTGCAGAATTGTTGTATAATTTGGCGGGAACCCATATTCATCATACTGTGGAAAGTTCGTAGCCGCGTGCATTACTGTACATATA…	2.021e-50	O16025	RecName: Full=Allene oxide synthase-lipoxygenase protein; Includes: RecName: Full=Allene oxide synthase; AltName: Full=Hydroperoxidehydrase; Includes: RecName: Full=Arachidonate 8-lipoxygenase
LYa_b1_contig_95928 (82..702) consensus	-669.268	0	GTTGGTCCAAAATACGAGAATGAAGGAATTACTTCTGAAATAATAAATGATTGTGACTACGGGAAATTAGCTGTCGGAGACCATTTGGCCATATATGGCTCATTTTTGAAAAATAAATACTTTCATCACGGAATTTTGACATCAACAAAGCCGGAAAAAATGGTTATTGATTTTAATGGCAAGGATAAACCATCTGCAAAACTCAGAGAGGTTGAATTAATTGATTTCATAGACGAAAGAAAGCCATTATTTAGAGTAAATCATACCAATCGTAAATCTGGTGAAGAAACTGCCAAACAAGCCAATATTGCTAAAAACAGCAAGACACCGTGGGAAGAGTATAATGTACTGCATAATAATTGCGAACATTTTGCCTTTTTCTGTGTGACAGGTGAAAAA…	0.402761	Q9BGL2	RecName: Full=Lecithin retinol acyltransferase; AltName: Full=Phosphatidylcholine--retinol O-acyltransferase
LYa_b1_contig_135648 (1..551) consensus	-668.873	0	GTGTTCCATTTGCACACGTGCAAGACCCACCATCAGAACATGTATCTTGTCGTTTGTGATGGCAATGACATACTCCATTATGGTCGCAGTGTCCCGGTATTCCATTTGTACAATTGCAAGTTCCACCATCAGTACATGCATCTTGTCGTTTGTGATGACAATGACATGTTCCAGCATGGTCACAGTGTCCTGGTGTTCCATTAGCACAAGTGCATGATCCACCATCCGAGCATGTTGTTTGTCGTTTGTGATGGCAATGACATGTTCCGGCATGGTCACAGTGTCCCGGTGTTCCATTTGCACACGTGCAAGCCCCACCATCAGAACATGTATCTTGTCGTTTGTGATGGCAATGACATGTTCCGGCATGGTCGCAGTGTCCTGGTGTTCCATTTGCAC…	8.626e-10	Q8I335	RecName: Full=Translation factor GUF1 homolog, mitochondrial; AltName: Full=Elongation factor 4 homolog; Short=EF-4; AltName: Full=GTPase GUF1 homolog; AltName: Full=Ribosomal back-translocase; Flags: Precursor
LYa_b1_contig_80175 (57..1734) consensus	-664.004	0	AGTAAACTGCGTCTAACTATCCAATGTGGATTTTTTAGTAATCGGACGATACTAAATGGGCATTTTAAAGATTCGATGTTCATTAACATATAACTGTTTTTGATAAACAAATGGATTTGGCTGAAGTTGAAAGGTTTCAGGAAGAGGCACCTACACAAGGAGAATTAGTACATGAAAAGTTTGTATTCTGTGATCTCTGTCAGTATGATAATGATTATGTTAAAGCAAGCATGTGGTGTTCGGAATGTATGGAACTATACTGTTCTCCTTGCTATAAAACACATAGCAGAAGCAGATCTGGAATTGGGCATAGGACCGAAAGCATCGACAAATATTTGGAAAAACTTGAATTTATAACAAACATATCCACGTCTTGCCAGGAACATTCAAAACGATTAA…	7.914e-07	Q96LD4	RecName: Full=Tripartite motif-containing protein 47; AltName: Full=Gene overexpressed in astrocytoma protein; AltName: Full=RING finger protein 100
LYa_b1_contig_456874 (55..429) consensus	-663.533	0	TTAACTTGTTTTGTGTTCTTTATAAAATACAGATATATCTAAACATCTTTTATGGAAAATCCAATATTATGAGTTAAAAACCCATTTGTATGTTACTGTAGTAATCAGGATAAACTAAAAGTATTAGCCGGCTTCATGAAATTCACGTACGCTCTTTTTACAAGACCACTGATTCCGACGACGGATAGTCCTCCTGCAAACACATCCATACCGTTGTCAGCTGCAGATGAAACAGCTTCGCCATCACTTTTTACGGAATTAGAAAACTTTCTCCGACCACCTTCCCGCATCATTCTCTTTACCACTGAACGAAACATTTGAGAGTTGATAACTGGTTTGTCCAAAATATTATTCTCTCCGGAATGATTGCTAGTG	2.1188	O74372	RecName: Full=DASH complex subunit duo1; AltName: Full=Outer kinetochore protein duo1
LYa_b1_contig_422210 (18..343) consensus	-662.566	0	CACACTTATTCATTAGCGTTCAGATAGAAATTTATTTAAGTAAGAAAGTTGTCTGATTGAAGGTATAAATAGATGAATAATGTTTCCACTTTCAAATATGAACAGTGAAACTATTCAATTATGTAGACTGGTCGTTTTTCTGAAACTGGTCAGCTAAATTGTTCATTTTTGCTCCAGTTAACTTCTGGTACACCAACTTTGACGTGCCGAGCAGCCCAGCAGTGGACACCATACATGACCATAAATGAAGATCCGTCAAAAGCGACAGACCGGTTTCAGCTGCACTAGACATATTTCTTTGACCTCCATTTCGTATGAATCTCACT	5.46955	B9KNB6	RecName: Full=(3S)-malyl-CoA thioesterase; AltName: Full=(3S)-malyl-CoA thiolesterase
LYa_b1_contig_454787 (53..972) consensus	-660.133	0	TAATATATTTTACGTTATTGAAACGGTGTATCAAATACCACAACAGATAAGTTAACAATGAGCATGACGAGCGACGACTTTAAGAAATTTTGGGATAATCTTGATCCCGCCAAAGGTCATGCTGGAAGTAAAGACCCTAATGATCATAGTACAGAAAGTACAGCAGGACCGACTAAGCATGTCAAACGTGTATGGACTCCTTGTGATGAATTCGACAGACGAATTTCGTGCCGAAAACATGGAGATTTTACATAAACATGTAAAAATCACGAACAATACAAAGTTGGTTTTGTTTTGCAAAAAAATTCTTCCAAATGATTAAGCAATTGTCATAATATAACATACATATATACAGATGTATTTTTTTCTTTTCGCACAGTTCTTTTCTTATCTGTCATG…	0	not available	not available
LYa_b1_contig_100280 (557..4052) consensus	-658.952	0	GTGTCTACATCAAAAAGTTATCGTAAGTTTTAACGTGAATGAAAACATTAATGATATCTTAGTAAAGATATTAAAGGAACAAAATATAGCACTACCATGATCTATCATGGATACATTGTGCAACCATACATAATTCATGTTATTACGTTTTCGTATTCTGAGTTACTTCTTGACTGAGTTGCAAGGAAAATGTCGTTATGTGTAGTGGGTTGTTTTGATTGTGCATGCCTAGATGAGTTTGGTAATGAAGCTGCTGAATCTGAAACATACGGCTCTTGTTTGCCACATCTTAATTTTTTACGAAAGCAGAATAATGCAATAGAAATCACCAAAACAACTGAAGTCAACGCTATCAAAATAATAATCAAAGTACTCAGTTTTGATTCCTCGGACGGATCT…	1.216e-15	Q8N2E2	RecName: Full=von Willebrand factor D and EGF domain-containing protein; Flags: Precursor
LYa_b1_contig_422247 (61..704) consensus	-653.182	0	CTTTTTTTGCTTTATAGTTGTAAAGTTATTTCAATGCATATTATTTTACTATCTTTATAAGATAAAAATCGACGACGCATAGGTCTTTGTCTTTGTTGTAAGTTACCTTAGGGTTGCTTCCTTTCTTTGGAACAAATTGGTATTCGTCATTTGTGTACTTTTCAATTATCTTTCTATAACGTTTCCGTCCTTGGAAGTCAGTGGTAAATTCCAATACTGTTCCTTTTGGTCCTACTTTAATTTGTACATCACCTATTAGCTTTCCTTTTCCAACGAAGGTTAACTTTGGATTGTTTACCTTGAGCTCAGTCTTGTCTGTATTATCTTTGCTATCTTTGTTATCCACAAGCATCACACGTGCAGTAATTGGAGTCGTCACGGTGATACCAGCACCAACAT…	8.37015	Q9FIQ1	RecName: Full=Ubiquitin carboxyl-terminal hydrolase 21; AltName: Full=Deubiquitinating enzyme 21; Short=AtUBP21; AltName: Full=Ubiquitin thioesterase 21; AltName: Full=Ubiquitin-specific-processing protease 21
LYa_b1_contig_411879 (1..1294) consensus	-645.993	0	CTCCAGTACATGTACCATTTGCTCTCTTCTGGCTTAAAATTGAGTACTGCAGCATACGCACTACCACACAGTCCTTGTAAATAATGAATTGGTGGTTCTCCGTATTCCTTTGTCACAAAACCTCCATAAAACATATTACCGAATTTCTTCATGTCAACAGCAGCACCATACTTTGGTATGTATACCTCATAAGGTGACAATTCAATCCATTCATTGTAGTCCTTGATTCTTGAATTATCACGAATATGCAGAGCAGCGACCAGCGGTAAAGGAACAGTACCGTCACCCAATTTCTCTCTTTGTCCACTCCATTTCATTTCACATTTCCTTTCAAGAAGTAATTCACCAATTATTTCGCCAAAGGTATTTGTGAGTGTAAAAAACTTCTCATAATCAAAT…	9.013e-48	P49147	RecName: Full=Cytosolic phospholipase A2; Short=cPLA2; AltName: Full=Phospholipase A2 group IVA; Includes: RecName: Full=Phospholipase A2; AltName: Full=Phosphatidylcholine 2-acylhydrolase; Includes: RecName: Full=Lysophospholipase
LYa_b1_contig_382785 (1..362) consensus	-612.353	0	CAGAATCTGTGGCGTCGCAAGCTCCTTCCAAGGCAGGAACAACTGCATCACATCCTCCGTCCTTAGTTACAAAAAAGCCGGTCTTGCATGAGCATGTTGAGGTAGTGCATTCTGCATTTAATATACATTGATCGCCCGGTGAAGCTGTACATGCTTCAGTTAACGCTATTCTAGTTAAGCAAGCGGCACTATCTTTATAATGGGTATCTTTACACCGACATTGTACAGTTGAACCATCATTGTTACATTCCGAGCCGGATATAGAACATTGGTCTGGGTCAGTCTCTGCGACGACGCACGTGTCAGTGTCAAGGGTTGTAACTTGTGCGGCACATGCTTCAGAAGAAGTTAATCGGAAAAAA	0.816956	P23142	RecName: Full=Fibulin-1; Short=FIBL-1; Flags: Precursor
LYa_b1_contig_307480 (1032..1639) consensus	-611.559	0	ATTAAAGAAACTCTAGTATCAAAGATGCTGTTTTATTTTATTCGTATATTCAGGGTAAATGCGTTTGAGGGTTCACAATCAATCAAAGTTCGTTTCATCGGGAAATTTTAGTAATATAATAAAAAAAAAAACACAAGTTTGTTGAATGGTGAATGAGACAAGTATTCACCATAGTGCAAACGACAAAGATACAATGAATTTATCCAGTTAAGAAAAAAAGGCATAGAGGTTAATATAATTTCTTCATATCTGTTATGAATACAATCAAAAAAGTTTACAAGTTAAATCCCGTGTGCACAATTCCCTTTTAATTATTTTTCAAATAGGAGTCTTTTTTGTTTTCTCGAAACGTTTTTGGCAATAGTCCATAATTCCTGCTACACCACTGGTAAGCCCAAA…	0	not available	not available
LYa_b1_contig_93984 (73..804) consensus	-589.428	0	CTTAATTGTCAATGTATTTATGTTTCGTTAAAGCAGAACAAAACAAACAATATATATATATGTAACATGGGTCGACAAAGTTATGGACGCTATTTTGTTTTATTTGACAGAGCGCTGATGACACCGTTCAGTTTTGTGTCAATACCGGAAACAGCTAGGATAACTCGAATAATATCCTCTGTCTTATATCCATTTATATACATAACTACAAGAATGATCATAGCACAAATAAATTCAACCATATGCCATTCATTCTCGCGCAGTAAAGCACGGATTGGCTTTTGTTTTTTCTCTTTGTCATCTTCAGTGATATGAATGATATTGTCTATTCTGGACAAGGCATACATTTTCGGTTCATTTCTGTAATCGTATACTAATCTTGTTCCTCCATTTGAAAAC…	3.9321	Q6FRY3	RecName: Full=Protein transport protein SEC61 subunit alpha
LYa_b1_contig_278857 (1112..2581) consensus	-581.424	0	CACGTCTAATGTTCATACAGAAGTAGTAACTAATCATATACAAAAACGTACAGGATGGCACCATCCTGGTAATGCCAACAAATTATTATGTTTAATTTGTAGACAGTTCAAAGACCTTTAGTTTATGGTTTTGAATTCACAAATGGCCGGGACGAATAACAAGAAAAGCAGAAACGGCCATTCTAACTTCATATCGTTGCATCGGTTTGCTGTTGTTTCGCTTGCCAAATTAACCCTTGAGGTCATTGAACATCTATCATACGAACCATTGTTAGCAACATGACTGAAATATCCTATTACCACACCCCTTTTACTTGCCAAACTTCTCGTGATATTCATTCCACGATAATCAGATTCAAAATAGGCAGTCTCAAATTCAAGAATAAAAGACAGCGAACT…	2.1936	B2DCR8	RecName: Full=SE-cephalotoxin; Short=SE-ctx; Flags: Precursor
LYa_b1_contig_157696 (1..204) consensus	-530.847	0	TGTATTCATTTTGTTTTCCTCCCAGATACCACTGTTTTTGCCACAGTTGGTCATCTATCTTTATTTTGCACATCTGACATTCTGTTATCTTCAGCACTGTTGATAACCAAATCAGGAAAAGTCCCAACATAAGGTTTCTCATCATTAGTGAAATGACCATTTTGTAGCTGACATCCTTTTCGTTAATTTGGACAATATATTAAG	0.630004	Q1LVQ2	RecName: Full=SH3 domain-binding protein 4-A
LYa_b1_contig_35332 (170..2392) consensus	-529.777	0	AAGTTGAATGGATGATCTGGTATACAAAATATAAAATGAATATTGGATCCAAGACGCATACAATAACAATGTCCCTCGGTAGTGTTAAAAGCAATCAAGACGCAAATACAAAAACCAATGTTTATATTTGCGCTTATGGGAATGGCATTAAGGCCAGTTTTCAGCCTTTTGAACTTGACCACGTGCATTCAAATCTTACAACAGATTTTGATACCGTTTCCAATGCTGTACTGCCACTAGATATTTCCACTTTAAGTTTACATAGACCTGATATAAATGGAGAATCTGCATCTGAATGGTTTGTTAAATGGATCGAAATCGATAAAGCAAAAAATCCTCGATTTTCTTTCTATAAATGGATGAAACGAAACAGTTATTATTCAAGGCGAAGTGATACTA…	3.05e-49	O16025	RecName: Full=Allene oxide synthase-lipoxygenase protein; Includes: RecName: Full=Allene oxide synthase; AltName: Full=Hydroperoxidehydrase; Includes: RecName: Full=Arachidonate 8-lipoxygenase
LYa_b1_contig_397653 (1..411) consensus	-522.123	0	TTTGATACCATGGTCATCTTGAAATCTGTACAATCGTCTTTGCATTTGCTTTCATCAACGTTTGAAACTGCACATACTATAATTTCGTGTTTAAAGAAATCAATAATACGTAATATGATCGATATTGGATTACCAAATACGTTTCCAGTGCCAATAACACCATTTGGTTGTTGTTTTGCAACGTCAAAGTCAAGCGCTATCTTTCTGTCCTTCTTGCTATCAACGCACCCGGCCCATGCTCCCTTTAAGTTCGTATTGATATGGTCCATTGTCAATTTGGGCCTCTTTTCCATTATAAAGATGCCGACAGTTGCTCCATGTTTTTCAGACATTCCTACTATTCTACTTCTTTCTGCAGAAATGACTCCCCTAAAATCTGTACATCCACCTTTGCCGTCT…	0.607259	Q5KXU4	RecName: Full=Chorismate synthase; Short=CS; AltName: Full=5-enolpyruvylshikimate-3-phosphate phospholyase
LYa_b1_contig_448793 (50..536) consensus	-521.873	0	GTGCAAGTAGAATAAAACATTGACTTAAAACATTAAGTATTCTAAATTAAACTTTCGTAAAGGTAATTGGACCATTTTTTTTTTGTGGAATCATATCTGTGTTATGTCAGAAAAAGTTTTTGATAAAGAGATTGGTATTATCTCTACAAACAAATTATTTAATAGTATATGGAATGTTTCAAGAGTTCACTTTTTTATTTCTTTACATTTCTCAAGCGTCTTGTACCACATGTTTAGGGTGTAAATCACTCCAACAGTTGAACTTATTGCGGCCCAGGCATACGGATCACCCAAATGTGACACAAAAGGATCGGCTGCACTTGAAATATTTCTGTAACCATTTCGTAAAAATCTCGCTCCAGTTAATCGTGCAATTCGAAGACTCATTACTGCTCTCGA…	4.15415	A7HZI3	RecName: Full=GTPase Der; AltName: Full=GTP-binding protein EngA
LYa_b1_contig_430224 (1..848) consensus	-475.886	0	AGAACTGATGGATCTCTAATTTCTCATTCTTGTTAAAAGTCCACAAGCTTTATCATGTAGAAATGAGTGATATTCAAATGTACTGCTGACATTGATCTAGCTGTTAGGAGCATAAAATATGAATTAGAAAGCAAAATGCTCCCTACTATATTTAGTTACTGCGTAATATCACAATGCAAAGTGTTTAAAACATTTGAGGGTAAAACCTTTACATTTAATACCAAAACACCTTTACAATCGAAACATATGTTACAACTTGTCTAAAACAACAGTTTATTTAGTTGTAAGCAAACTATTCAAATTTAGAACATGACCTCAGTTTTGCTCAGTTGGACAAAAGACCTCAAATCAAAACACAACAGAACTCTATCAATTAAGTTTACCAGTTATAAATATATA…	0	not available	not available
LYa_b1_contig_278857 (28..1107) consensus	-459.758	0	ATCACCTCTGTGTTAAAGAAAAAGAAAAAGAATGGTTATACATAAATTTGGATCATAGAGAAATACTCCTGTCCTGTCACACCACTGTCTTAAATGAGGGGACGGGTTTGGCGGTAGAAAACTTGTTTAATCCCGCCTAATTTTGTACATAAATGTACCACGTCATGAGCCTATAATTCAGTGGTTGTAGTTGGTTGCTGTATATCAGATTCGTTTTTCCTGTATTGTTTTGTACACAAATCAGACCAGCGTATTTCTCTTTTGGTGTGTTTAAATTTGTCATTTCGGGTTTCTTTTAAGGCTTACTATGTCGTATCGGGTTTGGTCAATGTTGACGGATGTACGATGACCTATAGCTATACGTCAATTGATGTCTTGTTGATTTACGTCTTATTAGCA…	0	not available	not available
LYa_b1_contig_123303 (1..1311) consensus	-437.639	0	TAACATGTTACCGAATTCCATGGAAAGATGGTTCTAATATAAAATGTAAGCTATGTGTTATTGATTCACCAGGTTTTGGTGATAGTCGAGGTACGGAATTCGACAAAAGTATACCCGAAAAAGTAAAAAATCTGTTCCAAATTGGAATTCAGAGTCTTGATGCTCTCTGTGTGGTTGTACCTGTATCTTGCAATCGATTACACAAAAATCACAAATACATATTTTCGAGTATTTTGGAACTTTTCGCAAAAGATATCTCTGACAACATTTTCTTTTTCCTAACCTACGACGATGGGGTAACAGGTAGACCAATTGCACTAAACACGCTCAAAGAAGCGGGTATGCCCGTTAAGGAAGATATGTACTTCAGATTTAATAACGCTAATGTTTTCAAGACAG…	1.12393	F4IBJ3	RecName: Full=Expansin-B6; Short=At-EXPB6; Short=AtEXPB6; AltName: Full=Beta-expansin-6; Flags: Precursor
LYa_b1_contig_181191 (1..1883) consensus	-403.012	0	TTTACCCAATCATATTCCTGGAAATATATAGGAGGTAAGATAATGTTACTTACGTGTATTCTTTATGTACGACATATCAATTGTGGTTTTCATGGTAATTAGTAGCCATAAACAACTAAAGTGTTAAATAAAAATTGCAAATTTTGGGGTTCAGATGATCAGGACTAAACACATTGTTTTATATGGGCAACAATATAAACATGACAAATCAAAGTAATATTATTCGACCTTCTGAACAGCCGACAAAGCATATTATCCGATTACATTGCTGAATACACAATAATGGTAATATATTTGACCCAATGATTTTTTTTTAATTTTTATTGGTTTTCTAGATTGATAACTGGTGTTGTGTTACAGTCTTAAAATGAAAGAAATGTAAAGCCTATCTTTAACAAA…	0	not available	not available
LYa_b1_contig_263318 (168..1441) consensus	-391.299	0	CTTAACATTCAAAAATCATTTATCATTTAAATTGGCCGTTTGAACCTTGTCGAACATTTCCTCCTCCATAGAAAAAAACGACTTTTACGTTTAATGACGCATATCTAAGAAAAATCGACTGGTTTCACAGGGATGATAAGTCCCATAAAATTGGTTGTCCAATAGAAATTAATTACCCTTCCTCCAATGACAGGCCATACTTACAGCAACAATTATGTTTAACGTTCGTCATTAACTCTTTTAACGAAAGTAATAGAATATTTATTTATGCTTAAAGTTCAACATTTTTAAAAAGAGTTTGTGTAAAATTTGACATTCTACAAGCCTACATACAAAAACAGCATAGACCAAATCAAACATAAAAAGGCGTACAAACTTATTGTTATATAAACGTAAGTC…	1.947e-23	Q96JN8	RecName: Full=Neuralized-like protein 4
LYa_b1_contig_267947 (1..1709) consensus	-384.145	0	ATATACCTGTGCCTTTGGATTCGAGAGCTTCACGCACATGCTAAAGCTGGACGACCTTGACATAGTGTATGATGATTTAAAAGATTCAAGTAGGTTAGAAGACGATAGATTTATTGTAGACGTTCAAATGAAAGTCTATCCTATACCAAAATGTTCCGTCTTTTACAAGGACAAAGAATATAAGCTATCAGTACAGATGATAAAAGATGTTAAATCGAACAGAAATGTGTCTGAACTGTATACTGTTACATTAAAAACTTTAGTAGATGTTGGACCAATTATTAACTACCACAACATATCTGTCAACGTTAAGTGCCAATCTAATTCATCGGAATACTATAGTATATTGGACATTAACGCATGCAAGGACGTCAAAAATGAAAACAGTTTAAAAGAGAC…	0	not available	not available
LYa_b1_contig_281795 (1..214) consensus	-356.739	0	GCACTTGCAACATGTATTACAGTCCAGCCAAAGGTGTCCAGTTGCACTAGAACTCCATCCAGAGCATCTAGACCATGTAACCCAACAACCACCTTTGGTCTGCTTCATTTCAAAGACAAAAACCAGCAAGCAAAGTGAAAATGCAAATAACTTCATAACGGCTTTCTCCGATAGGCAAGCTCAGAACTGCATGAGTATGTTGAATTGGAATTTG	5.723e-06	B3RFR8	RecName: Full=Hydramacin-1; Short=Hm-1; Flags: Precursor
LYa_b1_contig_344292 (110..742) consensus	-355.938	0	GCAGTCTCTTTATTGCAATATCGGAGGTCTACTTTCGACCACCACACAAAAATCCATGACATGGTACACTGATTGTCAACTCAGTAGTAAAGCACCCGATCATTTTGTTACTTTCCAGTACTTCGACTCTGGCTCTAAAATCACCATTGGCTATGAAACTCCATGCAGGTGGAATCGTTTTTACTGTAACTACTGCCTGCTTGACATTCAGGGAGACAGGATCGAATGGACATGTGCAGGTTAGTCCATTGTCGGTAAAGGCTTGGGGACAGGTGTGGTTATGAGAGAATGTTTGCAAGAATTCACATGGATCATCATAAACACATGTACCAACGCTGTTTTTGCATGGAACCTTGTGCCAGTTGTTAAGAAGTTTCTTATCCATGGTAACGTTTAATC…	4.585e-17	Q8HXX6	RecName: Full=Ganglioside GM2 activator; AltName: Full=Cerebroside sulfate activator protein; AltName: Full=GM2-AP; AltName: Full=Sphingolipid activator protein 3; Short=SAP-3; Flags: Precursor
LYa_b1_contig_349626 (192..1157) consensus	-321.167	0	TTTTTCAAAATTTGCCTACATTGCTAACCGAAATATGTGTCATGTAGATGTCGTATGATTTCCCCCTCTTGATGACTTTATTTACTTGGAAAAAAGATCCAGGAGGATAGAGTGCTTCCTCCTCTTTGGGAGAACATGAAAATTCAGAAATTAGTTTGGGTTGCCATTTTCGGTCGATGTCGCTATTAGTTATTGTATAAGTTGTACCATCGCCATAATTATCTGCTCTCTTTTTGATTAAAGAGGAAGAAGTAAAACCCAGAAAAGTAATAATTTCATTGTTGACTGTAGGTAAAGGGTTGTCTATGCCTCGATAAGTATTTTTTTCTGCTGGCTTTAGAACATCCCAATGCAGAAGGGTAGCTTTCAGGGCAGCAGCATATGGTGCGACACGGCTTT…	0.0671359	P55807	RecName: Full=NAD(P)(+)--arginine ADP-ribosyltransferase 2; AltName: Full=Mono(ADP-ribosyl)transferase 2; Short=AT2; Flags: Precursor
LYa_b1_contig_401761 (116..934) consensus	-312.523	0	GTTGATCCAGGTCAAATATTTATGTACATCTGCATACACACCAGGTAATTCTGGTCGAGCACATCCATATCCCCAGCTTACAATACCTATAAGATCCCAATTGCCCTGAGCGTTCAAACAAGCATATGGTCCACCAGAGTCTCCCTGACAAGCATCTTTTCCACCGGCGTCAAGACCAGCACATAACATTGTGTTTGCATTATAAGCATTACTCAAATAACCTGTACATGCGGCATCGGACAGCACTGGTTTGTATACCTCTTGTAGTCTGTCAGATGTTGAACCACCTTCAGAGGTAGTTCCCCATCCCGTTACGACACATTCTTGATTGAAAAAGTCACTGGTAGGTAATGACGTCACACAAATTGGGCTGACATCATCGTTCTCTGTAACTGTTCC…	1e-45	Q7RTY7	RecName: Full=Ovochymase-1; Flags: Precursor
LYa_b1_contig_236124 (38..360) consensus	-310.685	0	TATTACAATCAGTAAAACAAAACCTTGAAGATGAAACTTGCTTTAGTTTTATTAGTATTGTTACCAGTAGTATTTTCTACACCACAGAAAAGACTGATTTTCGATACGTTATTCCAAACTGATGAACTGAAAACATTAATAGACGGGATAGTAGGTACAGTAGGTACTGATGCAACTGAAAAAGCATGTGAAGCTGAATGCCACACACTCATCCAAGCAGATCATCTCCTACAATTCGGATGCCCACTGATTTGTAAAAGTTTCCAGAGTCTGGCTCACCGATTTGGACATGTAACAGTTCCCCCAACTACTGTTTAGATACA	0.925355	P17517	RecName: Full=Structural polyprotein; Contains: RecName: Full=Spike glycoprotein E2; AltName: Full=E2 envelope glycoprotein
LYa_b1_contig_531 (53..441) consensus	-305.306	0	CACAAACATTTATACAGTAACTTTGCACAAAGGCAACGGATCTATAGTCTTTCTTAGAAAAGCATTTGGTCAAAACAACAATGACAAGAGCAGTACTCGTTACCAGGGGGAAGAGAGTTATGTATCAAAAAAAACCCGGCGGATTTATTAAAAAAAAAGTAAGAGCAAGGAATGGGTGGCTTAAGACGGAAATATCAGTGGATTGTCCAATTTCCATTCCAATCGTTACAGTCGTTGGTGTAACATCTGCAAGAACAATTAACTACTTAAAGAAAAAACCACCAAATGAAGAACAATATGAGAACCTTTCTTTCTTGGGCACCTAAGGGTGCAGCAGGAAAAGAGAAGGGTTTAACGACTTTACGGCACTACATATATCTCAAATATTA	0.319717	Q8A5K3	RecName: Full=UPF0102 protein BT_2236
LYa_b1_contig_381612 (15..597) consensus	-304.724	0	TAACAATCTATTTAATAGAAAATCTTACAACATGAAAGTGAACATTGCTTTAATCAATTGAGATGTTTTGTAGAAGAACAATTCAATAGCAGGAAATATGCGATGTCCCAGCCTTCGTCAGATGTAACGGTCAACATTCTTTGGCTGCAGTCAGTTCTTCCGAATCGAGATTTCCATCCCCGTTTTTATCGAACACAACAAACACTTCTCGAACACCAGTATTTTCTACTTTATTTTGAAGTGCATCTGCAAATTCGTCAATACTAATATTATCGTTGTGGTCGATATCGTAGTTCAAAAGGTCACATGGAACATCAAATGTGAACTTTTGTCTCACTGTCTCAATTGCCCGCTTCCCTTTATTGCCGAACTCTATATGAACATCAATCTTAAATATTC…	0.0364876	Q5JN42	RecName: Full=Phosphatidylserine decarboxylase proenzyme 2; Contains: RecName: Full=Phosphatidylserine decarboxylase 2 beta chain; Contains: RecName: Full=Phosphatidylserine decarboxylase 2 alpha chain
LYa_b1_contig_246244 (1..668) consensus	-282.321	0	AAAGCCCAACCAAAAGCATTCAATTTACCGCCATTATACAACAAAAAACTTGGATAAAATTCATCACAACTCATATCTTTTCTTATGTTGTACCAGTAATGGAGACCCATTGTAGGGAAACATTTCCCCTTTGTCCAGTGAGTAGAAGTTATTCCATTCTGAAGATGTGGTATTTTGATGGAGTCAGCTATCGGATCTGTTCCGTTTTGAATGTATAGATCAGTGCCTACCCCCTGTTGGTGGTATAAGGCTGTAGTTCTTCCAGAGGCGCAAATAATTGCAGGATCAACAAAATATGCAGAAATGTGATGGTGGTTGCCAGACTTGATAAAAGGATGTCCCTTAAGAAAGGCATGTGGCCATCCATTTGCCATATTAGTTGGAACCGCAGCAGAAATT…	3.17749	B4JG34	RecName: Full=Transmembrane emp24 domain-containing protein eca; Flags: Precursor
LYa_b1_contig_418550 (2..313) consensus	-280.311	0	TTTTTTTTTAAATTGTTCACTTGTATTCAACAAATCATGTTAGTCTCCTACTTCAGTAAGTTGAGGACAGTTGTACAGGCTGTTCCGCACATGCTTCCGAGGAATCCGTGGACGAGGTTGTGGCATTCACTTGTGCAGGTATCTTGTGCCATTCCTGAGTGGGCAAAAGCCTCAACTTGTTTCAATACACTGTCAAGTCCAAAAGTATCCAAAATAAATCGTTCGTTGGGGGCACAGAACACAAATGGCAACAAAACCAAAAGAGCAAAGATGTACTTCATTGTTAAGCGGTTTTGTTTTCCTGTCCTAGTG	1.29386	Q10070	RecName: Full=Mitochondrial distribution and morphology protein 31; Flags: Precursor
LYa_b1_contig_81824 (3765..7591) consensus	-267.196	0	TGGAATATTTTCAGAAAAATTACGAATAATTAAACTGGCGAGTAAGGGCAATTGTTCAAGCTTATCTGATGTAGGTACAGCTGCCTTATGTGGAATTTCCAGGTTAACCAAATCTATGAGCCACAAGTCTCTATTAGATCGACTGAACATTGCAACACTTGATTCAGATGAGAATTCATCAAAATTGCATAACATCGCATTTAAAAAGTGTTCAGAAGTGATGGACTTTTTCCCGAAGGATATCACTGTTTTGAAAACTGCAATTGTTCCATTGCAAGGGAAGCCATGGCACATACTAAGTTCTCATATGAAAGTCCAGCAACAATCTACCCATTATATTCCCCAAAAAGAAAAACGGTTACAGAAGCAAGAAATAGCAGAAAAGCGATCAGAACAACT…	3.588e-121	Q80SU7	RecName: Full=Interferon-induced very large GTPase 1; AltName: Full=Very large-inducible GTPase-1; Short=VLIG-1
LYa_b1_contig_329126 (47..983) consensus	-262.168	0	GTAGTCTTTTCGTAATGTTTAAGCTTCTTGTGGTGTTTGTTGTAAACTAGATAACACTTGTGTTCCTAGATTTTTAGCGAACTGTGCTCCAGCTTGGCCAGCAAGGGCAGTTCCGTGTTGTACAACGTTTACTAAATGTGGCTGCATATTTGTCAGGGTCTGGTGTAGAATATCTTTTACAGCATCTTTCAAGGCAGCAAGTGCATTTTGTCCGTGTTGTAATAAGGCTGCTCCGGATGTTTTCAAAGCGTCAACATGAGGTTGGACGGCTGGGCCGACATCTGTTCCTGTTTGTTTAACAACGTTTCCGAGACCATTCACAAGGTTTTTGGCTGCCTCAAGATGAGGTTGGAAAAATTGAGCTAGACCTTGTCCTACTTGTCCGAGTAAATCAGTTAA…	1.88914	Q8NWQ6	RecName: Full=Extracellular matrix-binding protein ebh; AltName: Full=ECM-binding protein homolog; Flags: Precursor
LYa_b1_contig_267976 (14..915) consensus	-258.537	0	TTTTTTTTTTTCGAGGCATTTTGTTTGAAAGCAACATAGTTGAGAAATAACTAAAGTCTGAATCGCTCACTTGTCAATACAATATTAATGTCACTTGTATTGCCGTCATTTGATTATGTTTGTTTGTAAAAAAAAATGTGTTACATTTAACAGGTTGCAGTGTATAATTATTTTTAAGACTGTTATGTAAATGCCAAATATTTGAAAAAAACATTGCTCAGGGATAAAAGTTCTCAAAAGGTGTCGTTTGACAATAACGGTCATTTTGGTTTTTGTGTAAATAATATAGTGTTATAAAGATTTGCCATTTACTTTTTTTTTTATCTTTCACAGTTTCAGAAAATACATCCTAATATGGGTGATCATTAACTTTTACTGGTAATAATTCCTCGAAAGGGT…	0	not available	not available
LYa_b1_contig_231849 (570..2106) consensus	-256.402	0	GCAACACATAACTGATATATTGTTAATAAAAATACAGGAAAAAGCAGGACTCTTGTATGTTAACGACTGCAAAAACAACAACGGTGATTTAAAATGAGATAAGTGTTACAAATGATATATCAAAATGGACAGTACACGGATAGTATCTCCTCGTGTTTATCATCCAAATAATATCTCTGATGTATGTCGATTATCTGATCGACGATTGGCCTGCCTGTTGTGTCATTGCAATGAATAAACTCATAGTTGTCTGTTTGATCCGGCAGCAATATCTCTATTATTCTCTGTACATTTTTGCAAAAGATTTGCACTTCTGAGTTCATCTGGTCCTCAGTTAGTAGTTCGTCTTCTTTCATTTGACGTATCACTGTTAGTGGTCTGGGGTATTCACAATGCCAA…	0.607954	P25300	RecName: Full=Bud site selection protein 5
LYa_b1_contig_106929 (23..1198) consensus	-244.422	0	TACAGGTTCGAGAAGATTTTAACGGCAGATATAATAATCAAGTATACAGAAAATTAATTATCAAGTAAGATTATTTTACGATGGGTAACAAAATTGTAAAAGTAGTAGGAGGAGTGATAAAAGATGTAGCATTTGATGCAGGAAAAGCTGCAGGAAAAGCAACAAAAGACTCTTTAATAAACAAATTGCAAAAACAGGCATCAACCAAGAGAATGTATTCCGGGGTTTATCAAGGAGTACATGAAAAAACCGTTGAAGCAGTGAAAGATATACCACATGACCTACCTAAAGCACAAGGAAATGTGCTTATAACCGCAATTGCAAATGCAGCAACACGAGAATCAGTTAAGGCGTTAACGGATAATATAGATATAACAACAAAAGAGGCCGCAGAAGAAA…	0.950337	P16462	RecName: Full=Leukotoxin; Short=Lkt
LYa_b1_contig_124473 (6..215) consensus	-230.929	0	ATTGAAAACAGAAAAAAACAACAACTTCAAGATGAAACTTGCTTTTGCTCTATTGTTGGTGCTACCAGTTGTATTTTCTATGCCACAGAAAAGACTTGTTTTTGATACTTTATTCCAAGCTGGTGAACTGAAAACTTTAGTAGATGGGATTGTAGGAACATTAGGTACAGATGGCACTGAACAAGCATGTGAAGCCGAATGCCACACACT	2.18871	B1YWB2	RecName: Full=Glycerol kinase; AltName: Full=ATP:glycerol 3-phosphotransferase; AltName: Full=Glycerokinase; Short=GK
LYa_b1_contig_429865 (78..942) consensus	-222.291	0	TAATGTATGTTCATAAATTATGGTAGCAAGTTTCACATTTAACATGTTTATATCATTAATGCGGCTGCTTTTAACACGGAGATATAAATAAACAACAACCAACAGAATAGAAAGATATTAAAGCTCGCTTATCAGAGTCAAATCAAAAACAGTTATTAGGAAAAGCCTTCACACATGAGGTTAATACCAGACGATTAACCACTGTCTAAAAGAATTATTACAATAGTAAAACTATATATCAGCAATTCATCATGTTCATCAAAACTGTGTATTTTGGTATAGGTCAATAAATTTCTAATACATACGATAGATTAATAAGCATATCTTATAAATAATCTGTACAATTCAGGAATGATTCAGTCAGCATATACCTTTTTGTCAAGCGCAGGGTTAAGCTTA…	0.706208	O83444	RecName: Full=V-type ATP synthase subunit I 1; AltName: Full=V-ATPase subunit I 1
LYa_b1_contig_81824 (109..2348) consensus	-216.069	0	GCTGCAGACATCTTTAAAAGCAATATTCGTTAATGTGCGAAGTCGTTAGTATTGGTATGTCGGATATTGGTAATCAGCACGTTATTTCATGAAGTCGGAAGTAAACTGTGAAATCCTCATTGCAAAGCAAATTTACATGAAGTTATGGAAGGAAACAGTTGTACAGAACAGCCTGTAGAAAATGATATTGAAAAGGATGACACAGAAGCACGAGGTTCTGATGAAAGTGAAAATAAAAAGACACTTAATGAAGATCCTCCAAACATCACTAAAAAATCCGAATTGGCAATCAAACTAGATGAGACGGGCTTGACGTCTAGTGTTTGGTTGCCTGTATTTCATACTGAGCTTCAAATAAACTGTTTACAACAGTTGCAGTATTTGAAAGAATCGGATATA…	5.232e-37	Q80SU7	RecName: Full=Interferon-induced very large GTPase 1; AltName: Full=Very large-inducible GTPase-1; Short=VLIG-1
LYa_b1_contig_461556 (63..687) consensus	-213.846	0	TAAAAAAGTCTTTAATGGTTAAAATTTAAGATTCCAATACGTTGTTTGTGTACACCATACTATTTGATAAAAAAATAAAAAAACCAATGCGTAACGTTATATATATTGTTTTAAGCGCTATTATGTTGGTATCATAGACTACCATCGATCATTTGTAACTACTGTCCAACTGGTTCCAAGTTCCAAAATGTTCCTTCTTGTTCTACTTGTACATAGACAACTTCATTTCCGTCGAAAGATAACCAACTTTGAGTCGGATTTGGACAATTGCAACTAACATCCTCAGATATTCTGGTATGGTTTCCAAAAGCATTGGACAATAAGAAACGCATGCGACTCAAATCAGAGTCATTAACCATTGCAACATTACCATCTTCTACAAACTGCAAATAACGGTTA…	8.12468	Q32M02	RecName: Full=Fascin-2; AltName: Full=Retinal fascin
LYa_b1_contig_232116 (291..771) consensus	-213.662	0	TCAGATGTAATTGGATGCGCACGGACTAGTATTTCGTCTTTAATTTCATGTTGGTAGTGTAACCGTTCTATTTTGTTGAACAAACCCACTGAATCGATTTTTGATTCCTTTGTATCTATCACTAGGCAAAGTCCATGATCTATGTTCTTTATTGCAACTTTATGCTTTTCAAAATCATGAAGATTAATGGATGGACAATAAGAGTCATTCAGATGGGCGACGTCCCCGACATTGACGGTCATTAGGTTTTCCTTATTGTCAACAATAACATCCTCATTCACCCTTCCTCCAGGCACCTTAACATTGATTCTGTATGTCTTAATATTGTCGTTACTTTGGACTGCAACAAAAGGCAATATAACTGCAAAAAGTAGTGGCAAAAACATGTTAACTCCTCTA…	4.115e-05	Q9CQS6	RecName: Full=Gastrokine-2; AltName: Full=Blottin; Flags: Precursor
LYa_b1_contig_68099 (1..1441) consensus	-209.662	0	CTGACAGTGTGAACAGTTCATCGATTGTTTACCTGTGTATTGTCGTGTGTATTTTGGGACAGTTATGACATACTTCGATTGTTTCATCAACGCTGTATTTTTATTTGAGTTTGCTACGTCTTGTGCAAGTTCAGACAACTTATTCTTCAAAGCTTCTAGCTGTATTTTCAGAGTAATTCTTGCATTCATGACTTCAGTGCTGGTCTTTACACTCGTTTTTGGCGCTTTTTCTATTTCTTTGAAAAAGTCAGCAAAACTTTCGTTTCTTGCTCTCCAAATGAGTGCATCAAGTTCTGGTTTTATCTTCTTAAATAAGTTTGAGTTATTGAATCTGAAATTTTTATCGCAAGGTATCCCACAAGCCGTTAACAAATGTAAGCATGTAGCATCACCACCGTC…	0.108734	Q2S3A3	RecName: Full=Lipoprotein-releasing system ATP-binding protein LolD
LYa_b1_contig_218252 (405..2229) consensus	-208.363	0	ATCACGAAATGCACTATAGTTGGTGAATTATGACCTGGAAACACATATACCTCTTCACATTTGCCTTCATTCCATTCTTTGCGTATAGTATGTAGTTGTGGGTCTATGTTTGGAAACGGAACATTTCTTTGTTTTGCCCATTTAGCCGCCAATTCCAATTCCCGAAACGGCCACTCCTTGTCTCTACGACGATCCGAAAAATCAAACGAAAGGATAACATCCACCTTTCTTGCAGGATGTAATACAGCTGGATATGGTGAATTAAATGCAAGCCCTGCATCAACTAACATCATATCATTGGCTTTAAAGTCAACTAAGTCTTGATCGTCAACTGGAACGTCATTCAATAGTTTTTTCATTGTTAACCCACGTAGCAAATTTGGTACTTTTCCAATAACT…	2.522e-48	Q50L41	RecName: Full=Cytosolic phospholipase A2 zeta; Short=cPLA2-zeta; AltName: Full=Phospholipase A2 group IVF
LYa_b1_contig_314127 (73..952) consensus	-203.307	0	GAATCAAAACATGTGAAATGATGTGCACAACGCCATTTTCAGCCTCGATATCGGTAACCTGGAGAGTAGCTGCATGGTTCAAGACAGGGTTATTATTGCTATCAACGGTCACACTAATGCTATGTCCCCTGTACATTGTAGACAGTGTTCCTGCATGGTCTAAGCTCTTCTCGTGAATTGTTCCTGGGTGAACATGATAATCAACGATATGTCTAGCATAAATGTAGCTGCTTTTCAATTTTGTGATATAATCAGCATCCAGACTAGCGATAGCAGCATTAGTTGGAACAAACATTGTGTATCTCTGTGAGCTTGTTCTATTGAAGACATCAGTCAATTTTGCTGCCTCTAGAAATTCCATAAATCCACTGATGTTATAATCTGGGTTCTTTATGACAT…	1.525e-24	Q15063	RecName: Full=Periostin; Short=PN; AltName: Full=Osteoblast-specific factor 2; Short=OSF-2; Flags: Precursor
LYa_b1_contig_317387 (48..879) consensus	-190.345	0	CTAGTTTTAACCATGACTACATGCTCCTGGTGTGACAGATACATCGTCAATAGCCAAGTCGCTGTGGTATGAAGTTCCTGTTCTACCTTCAATTTGGAAACTGAATGCATGGGATCCTTTAACGTTAACTTGAGTCTGCACGTGCATCCATCTGTCACCGTGGTCACCGTGGTAAGACCTCATCGCATGTTTCCTTCCTCCGATCAGTAGTTCAAAATAGATATAGCCCATTTCATGACCATACATGTTAAACCATGCTGAGAAACAATAAGTTCCAGGTTGGTACTGTGGTGAAACAAGGATGGCGTTTTTGTTCGTTTGTCCACTGGATTCCAAAAACAAATAATGTCCTCCGCTAGTTCCACTGTGGTCGGCATGTGGACCAGTGTTTCGGCTAGG…	1.782e-23	B3EWZ5	RecName: Full=MAM and LDL-receptor class A domain-containing protein 1; AltName: Full=Skeletal organic matrix MAM and LDL-receptor 1; Short=SOM MAM and LDL-receptor 1
LYa_b1_contig_369215 (54..625) consensus	-183.051	0	TACATGTATTATGTTAGGACACTTCAATAAAATAATTCAAGTTGATTTTCAAAGTAAACACCCATGTGGTCAAAGGTGGTTCAAAGGTTGAAACGTTTACGGCATTATGGCTTTTTTTCCTATATAAGTTAAAGCAGGTGCAACCGAACAAGCAATTTTCACAATATCCTTCCAAAATCCTTTGACTGCCTTTACCACTACTGTGACAGCGGATTTTGCAGCATCTCTGGCTTGAAGTCCCGTACTTGTTTTTACCCAGGTCGGTGTTATGCCTGATTCCGGATGTAAGGTAACCATGACTTGATTGTCGCCTTGGCCAAAAGTATATCTATCACATAGAATACACAGGGTAACCTGCACATCATTTCGGCCTCTGCAGATTGAGGTAATCTGGTCTAA…	0	not available	not available
LYa_b1_contig_107136 (129..967) consensus	-177.018	0	CCTGTGCTTTGGGGTCTGACTTGAGACATATGAAACAAAATGGCAGAAAAATTGCAAAAAAACACATTTAGAATTGCATTAATCGGAAAAACTGGGGCTGGAAAAAGTGCGTTAGGAAATACTTTACTGGGAAAACTTGCATTCAAATCTGTCACTGGCAGTGAATCAGTTACATTTGTCTGCAAGATGGATTCAGCAGAACTTCAAGATGGCGACTTCGTACAAGTTGTAGATACCCCAGGAATAATGGATACATCAAATCGAAACGTTGCACATGACGTTACAAAAGCAATAGCATACTTATCTCCAGGCCCACACGCGTTTTTACTGGTACTGCAACCAAACAGGGCTACAACAGAAGAAATAAATTCGCTAACGGAGTTAACAAATCTGTTTGGT…	5.249e-28	Q8WWP7	RecName: Full=GTPase IMAP family member 1; AltName: Full=Immunity-associated protein 1; Short=hIMAP1
LYa_b1_contig_166106 (9..508) consensus	-167.573	0	ACCTGGTGTTCCAGTTCCGGTTCCGGTCATGGTTCCGCCAGTTCCGGTTCCGGTCATAGTTCCCCCAGTTCCGGTTCCTGTCATGGTACCACCGGTACCAGTTCCTGTCATTGGACGTCCTGTATACATTGATCCTCCTGAACATAAACAGGTTCTTGCACAATTGCCCTTGACCCATCCTGAATATGTGGGATCTGTACATGTTCCACCTCGAGCATAACCGGCACAGTTTGAGAGTTTGTCAACACAAGTTACGGTTCCAGCTCCAATCATTGTTCCAGTTCCGGTTCCAGTTCCGGTCATTGTTCCAGTTCCGGTTCCGGTTCCGATCATTGTTCCAGTACCAGTTCCCATTCCAGTTCCAGTTCCAGTTCCAGTACCAGTTCCTGTCATAGTTCC…	0.546734	Q21388	RecName: Full=Zinc metalloproteinase nas-10; AltName: Full=Nematode astacin 10; Flags: Precursor
LYa_b1_contig_344086 (1..2375) consensus	-163.759	0	AATCTTATTTGCTGTAATAATGATGTCAAAAATAAATGTTACTGGTTGCGAACAAATATTTTATTTATTAGCGCCTCGGAGATTGTACGATCGAAGATCAACCTGGAAAGGCAGGTTCGATTCATATCTTAGTTGGTAAGATTTTTGTCATTTTTCCTATCGAAGGTCGTTGGATTTTTCCTGGTTCTCTGGTTTCCCACACAAATAATTTGTTTTGACAGTTGCATCACACAACAACAGCCAAACAATTAGTCCATCTATTTAACCAGCATATTTGAAAAAAATAACTGATTCGAAGATAAAAATAAAGCTATTCAGTTTCGTTTCTAGTTCGTCCACGCAATCATTGTTAATAGAATTTTAATATAGTTATTTCGTTAGTAAATCTTGTTAATGTAT…	4.432e-34	Q63184	RecName: Full=Interferon-induced, double-stranded RNA-activated protein kinase; AltName: Full=Eukaryotic translation initiation factor 2-alpha kinase 2; Short=eIF-2A protein kinase 2; AltName: Full=Interferon-inducible RNA-dependent protein kinase; AltName: Full=Protein kinase RNA-activated; Short=PKR; Short=Protein kinase R; AltName: Full=Tyrosine-protein kinase EIF2AK2
LYa_b1_contig_329127 (33..983) consensus	-161.956	0	GTTTAAAAAAAATTGTATTCTTTTCATAATGTTTAAGCTTCTTGTGGTGTTTGTTGTAATCCAGATAACACTTGTGTTCCTAGATTTTTAGCAAACTGTGCTCCAGCTTGGCCAGCAAGGGCAGTTCCGTGTTGTACAACATTTACTAAATGTGGCTGCATGTTTGTCAGGGTCTGGTGTAGAATATCTGTTACAGCATCTTTCAAAGCAGCAAGTGCATTTTGTCCGTGTTGTAATAAGGCTGCTCCGGATGTTTTCAAAGCGTTAACGTGAGGTTGAACGGCTGGGCCGACATCTGTTCCTGTTTGTTTTACAACGTTTCCAAGACCATTGATAAGGTTTTTGGCTGCCTCAAGATGAGGTTGGAAAAATTGAGCTAGACCTTGTCCAACTTGTCCG…	0.824866	Q1GYD4	RecName: Full=Aspartyl/glutamyl-tRNA(Asn/Gln) amidotransferase subunit B; Short=Asp/Glu-ADT subunit B
LYa_b1_contig_10135 (98..3697) consensus	-155.885	0	ATCAACATGGGTGATTAGTAATTAACCCATCGGACCATTTACAGTCAATAAACACATTACAATGAGTTATATAGTGTTTTCAGTATCATCTGTCAATTCTGGTGTTTGCTTCTCGTCATCACTGTCATCTGGTGGCAAAGGTTCTGCTGTCTTTGTTAGATCCAGTATGGCATAATTATTTCTGTTTTCAATTCCCCTAATAACGAATCTTCTACCACTTGGGTCAGGTTTTAGGTCTAAGTCTGCATAAATAAGACCATCTTTATTCTTTGTGACCTTGTATCCTTGTCCATTTGTCGAAACATCTCCTGAATTGCCATAAGTGTTTGCGTATTCCTCAGGCGAGTGTGTTTTCATTAGTTTTTCAGAGTTCTCATATACACTACCTAATTCTATGCC…	5.56e-35	Q9R044	RecName: Full=Nephrin; AltName: Full=Renal glomerulus-specific cell adhesion receptor; Flags: Precursor
LYa_b1_contig_381867 (1..1422) consensus	-142.366	0	CTTTGGTCAAAAGATCAAATTGTGAGTTGGAAATTCGTTTCTTCTGCCTTAGATTATTAAGTTTATTTGCATTTTTTCTAATGGTGTAGGTTAGTTTTCCCGGATCGAATTCTGTATCAAAAACATGGCGAACAGTGGATACAGCTGGACTTGCTACCAGATGAACAACTCGAAGGTAGTTTATTTCTTGTTTTGTTATTTTGTCCTCGTCTGTTTGTGTGTATTCAAGTTCTGATAAAACAGCTGTTTCTTTCAAGTCTTCTGTACTTGTATATTTATCTACTGGTTCATTTTTTGTCAGTAACGGAATTTTCTCTTCAATTGATATTTCACTTTTATTCGCAGAACGAACACCAAAATAAATTACTGTACCAATAATCAGTACTATAATAAGCACAG…	1.52146	Q9WU20	RecName: Full=Methylenetetrahydrofolate reductase
LYa_b1_contig_349809 (1..902) consensus	-141.778	0	TTATGTATGACTCATCTCCATTTACAAAGATAAGTATTAAATAGCCAACCAGTCAAATGTTATCCGTGTTTTTCACGGCAAATATGTCGGTAGCTGTAAGTTTCTTGTCTGGATTAAAATTTCCGATGCTAGTAACCGATGGTTCCCTGCTACGGTACGGAGGTGGACTATCATTGTGAGTCTTAGACTGGATATTTACAGATGAAGTTTTACGTTTATATAGAGGTGGACTGATTCCAGTTTTGTTGGTTTTCCCTGGTTGTGGTACATTATTGCTATTTGTGATTTTCCGCCGACTTTTACGACAATATACTGCAAGTAACACGGACAACACTACAACGACGATGATGAATATGACACCCACAACGACAAGTATTTTAACATATTCTTTAGTTTCCT…	6.303e-09	Q862Z3	RecName: Full=Uromodulin; AltName: Full=Tamm-Horsfall urinary glycoprotein; Short=THP; Contains: RecName: Full=Uromodulin, secreted form; Flags: Precursor
LYa_b1_contig_260579 (1..872) consensus	-135.587	0	CTGAAAATTCGAAGGAAAGAATAAGATCAATATTTCTTGCAGGATTCAGTATCAGTGGATATGGTGAATTAAACATGATGCCTGCATCAGTCAACATCATTTTTGGATTTTTGTTGTCCAAGACATCGTTTGTATTCGTTCCACTGGAAATTTCAACTCCACCAATTTGCCTGACTTCATTTAAACCATATAACCAGTTCGGTACTGTAGCTAATATCTCGTCTGGGAACTGTTTATTACTCTTATTGCTGAATTTAGTTAATAACCCATAAGCACTGCCACAAATTCCTTGTATAAACGAAAGTGGTAGTTCCTCATGTTCTGTCGAAACAAAACCGTTTTCAAACTTTCTTCCGAAGTATTTCATATCTATTCCAGTACCGTATTTCGGCATAAATA…	3.483e-33	P49147	RecName: Full=Cytosolic phospholipase A2; Short=cPLA2; AltName: Full=Phospholipase A2 group IVA; Includes: RecName: Full=Phospholipase A2; AltName: Full=Phosphatidylcholine 2-acylhydrolase; Includes: RecName: Full=Lysophospholipase
LYa_b1_contig_271790 (1..1125) consensus	-132.734	0	ATATATAGTAGACAATCGTTACGGTAGATATTTGCCTATTGATCATCATAAAATATACCACAAAGACCATCCTCTGACACCTATTTATGTGTCCTAAAGTTAGGTCGATTCCTACGATTTTTCCTGACTTACGACATGTTTGATAAACCTACTTAGGACTAAGATATGTCCTAAGATAATCTTAGGACATGTACTAGTCTTGAGAGCATTTCGATTAACAGGACCCTGTTGATCTTTCGATTTCCGGTTTCTTTGTGTCGTCACTTCTGATTACAACGTATGCAACAGCTGAAATCTTTTCTTTGCAGGCTCTTCAAATGAGAAAATTTTTAAGCATGCATGAATCATTATATCTTCGAAACAATTGTTTTAATAAAGAAATAGATGACTGTACATGTA…	0	not available	not available
LYa_b1_contig_333934 (13..312) consensus	-130.896	0	CTAAACCTTCAAGTAACTTGTAATTATTTAATTTTCCTAATAGTCGCCTTTGGAACCAATTCCATATCCGACTGGTCCGTATCCGCCGTATCCTCCTCTGATTCCAACTCCGAAACCGCCGCCACCAATTACACGTCCGCCTCCAATACCGCCACCAATTCCACGTCCGCCTCCTACTAGTGCACCGCCACCGATACCTCCTCCTCCTCCTATAACTCCTACTACTTGTGCTCCTCCACCTAATCCGACTCCGCCTCCTGCTCCTCCTCCAATAGGTCCTCCTACTAGGCCACCACCTCC	0	not available	not available
LYa_b1_contig_381851 (111..2002) consensus	-129.297	0	ATTTTTTTTAATTTAGTAACTACTTTCCTTTTTCCATGATGTATTAAATTATACGACAACGTCAAACACGATAAAGAAAAATCAGCAAACAAGACAAAAAAGACAACTTTGCTATAAATGTAATTACGCATGTGTCATTTACAATTATTAGAGAAAGTCTATTTCAACATCGAATTCATCAACATTTTGTATAACGTCCTCTCGAAGATCGGAATTTTCAATCCTTTTCATTAACATTTGATGAGGAGTCATCCTAGCTTTCAAAGATGCTTTGGCTATTTCATGACGCTTGTATTCTTCTTGATAAAGTTTACATAGGTCATGAGTTTTTTTCATCACGAATTCTTCGGCCTTTTCATAAGTTGAACTTGTAAAGTGGTCTTGTCCCATCGTCTTCGC…	1.518e-05	Q9NUV9	RecName: Full=GTPase IMAP family member 4; AltName: Full=Immunity-associated nucleotide 1 protein; Short=IAN-1; Short=hIAN1; AltName: Full=Immunity-associated protein 4
LYa_b1_contig_296676 (77..1279) consensus	-128.112	0	CGGTGCTTCACTGTTAGTAAAGTAATCATTTATAATCATTAATTTGTTCAACGCCGGTATTTTTCAAAGTATGATTGCAAGCTCAACTTGAAACACATGATTCACTATATTAGATGATTATTTGCTATAATTAAATTCGAAAAGCAATAACAAAAAATCAGTCGTGTTTCTTATTACACAGTATCAAAGTCATCTATGTGTGGGTCATCCATATGCATGTTTGAGCATAATTTGGACTTTCTGTGTTTCAAACCAAGACGAAAATGTCGATGATCATCGTCTCCTAATTTTGGATCCTACAGATATGGAATCTGAATGATCGACATATTGTTGAATGTATGAGTAGTTCTATATTTCTGTCGAAATCTTTAAAAGGGATATACAGTACTGTTATATCCC…	6.88509	P51728	RecName: Full=Lysozyme; AltName: Full=Endolysin; AltName: Full=Lysis protein; AltName: Full=Muramidase; Flags: Precursor
LYa_b1_contig_289562 (1..268) consensus	-116.928	0	GTTCCAGTGTATACGTGTCCATCTGGAGTGTAGACCGGAATAAATCCGGTACCACCGTTACTTGATCCTGATAAATATGCACATTTGTTGCATGTTTTGGCACAGTTGTCCTTTACCCAGCCAGCGTATGTTGGATCATTACATGTTTGTTGTCCATAGTCTGCACAGTTCTTCACGTGATCGACACAAAGCACTGTGTACGATCCAGAAATTACAGTGCCTCCTGTTCCTGTACCGGTCATGGGACCTCCTGTACCTGTTCCTCCTG	0.0265564	Q21388	RecName: Full=Zinc metalloproteinase nas-10; AltName: Full=Nematode astacin 10; Flags: Precursor
LYa_b1_contig_349492 (28..636) consensus	-115.173	0	CTGTATTTTATCCTTTTTATTATTGGTGTCGTTTTGTAAAAGAACTATGTTATTTTCAAAAACTGTTGTAATGTATGTGGACGAACGGGATATTGATATTGGATAACCAAAGTCAAAATATTAAGGAAACAACTAATGAGCTTTGGTCCGATATATTGATTATAACGGTTTTCAAAAAAAAATATTGGATAAAAAAAAACACCACCCAAGGATGCATTTTGAGCCTTTTAAATACAGATGAAGCAACGGTAATTCAGAATAAATTATAAAAGTTAAGGATAACGACAGAACACTACGTCAGTAAAACACATTACGCATGTAGTTATGTCATATAAGCAACACAAATGAAGACATGGAACACCAAATATCATTTTGACCAGGAACTGTTCAATAAATCGT…	0.881371	Q8IE95	RecName: Full=Variant-silencing SET domain-containing protein; Short=PfSETvs; AltName: Full=SET domain-containing protein 2; Short=PfSET2
LYa_b1_contig_26815 (1234..4187) consensus	-115.085	0	CTCCGTTAAAGGCACACAAATAAAGAGCAGTGGAACCATCGAATATCTGGGCATTAATATCTGGTTTGTGCTTTAATAAAAGCTGGACAATACTGACGATTCCTCTGGAACTTGAAGCAAGCAGTGGTGAAAATCCGTCTTTGCTACAGATATTAACATTTGCATTTCTTTCTAACAGCATCCTTACTATTTCCGTATGTCCATTACTACTCGCAACATGGACAGGACTAACGTTGTTTTTGTTACATTTGTTAACATTCGGGATCTTTTCTAACAGTCTCTTAACTATATCAATATGTCCACTCTGGCTTGCCACGTACAAAGGACTACGGCCATCATTGTCACAGAGTTCAATATTTGGATTTTTCTCTAACAGCATTTTTACTATATCAGTGTGTC…	5.084e-118	G5E8K5	RecName: Full=Ankyrin-3; Short=ANK-3; AltName: Full=Ankyrin-G
LYa_b1_contig_185897 (1..1852) consensus	-114.182	0	ACTCCGTTTCGTCAAAGGCAGATGACACTTCGTCTGTCTCATAATCTTCATCAATGAGTTGACTTGATTTACAGACGTCTGCCGTTTTTGGTACAAATACGGGCAACTGGATGGATTCATCTGCAGGATATTCGCATAAAATAGCAGATGGTGTAAGTCTAGAATAGATATCTATTTGTTCTTCTGAATCTGTTCTTTCAGCATCAATAGATTGATCATTATCTATTTCTTTGTCACTATACTGCATTCTCTTACCAAATGCCTGAATTCTATTACCAAATGACTGCATTCTTCTACCAAATGACTTATTTTCTTGGCTAAACGTAAATGGTTTATCTTTATTTTCGTCATCAGCATCCAATAAATTACCTACAGGCTCTCTATCCGTATGTGCCAATT…	2.24609	Q796Q6	RecName: Full=Uncharacterized HTH-type transcriptional regulator YisV
LYa_b1_contig_417916 (123..2223) consensus	-110.082	0	CTGGGGGTTATCATTTTTTTTATATGTGTATTACTGCATTCTGGTAAAATAGTATACTTAGTCTAGTAATTGAATAAACATCATTCTATAGTTCAATAAAAAAAAATGAACGTCTACTGTGCATTGTCATTACGGTTGTCGATGGCGATTTGAATACAATCATTAATTCTGTTTTTTTGGTTCATGACATTGAACTCCATCAGTTTGCTGAACCGGTCAAATTCTCGTTCAGAATACTGAAATTTTTCGGTTTTATACTCATCAAATGCTTCAAAATCTGCAAAATCTTTTTCTTTTTGTGTTAGACGACTAACGCCTGGTGCAGAGTTTTTTCGAAAGTCCTTGTTAGTCATCACGAAATGCATTATCGTTGGTGTTTTTATTGGTGCCGTTGTACCT…	2.9e-77	P47713	RecName: Full=Cytosolic phospholipase A2; Short=cPLA2; AltName: Full=Phospholipase A2 group IVA; Includes: RecName: Full=Phospholipase A2; AltName: Full=Phosphatidylcholine 2-acylhydrolase; Includes: RecName: Full=Lysophospholipase
LYa_b1_contig_51805 (15..3714) consensus	-106.4	0	CTAATTTCTGTATCGCGTTTTGATTATATAGATTAAATGAATATTCTTTATATTTCATAATCCAAAACGTTTCTTGAATGTAAGCCAGAGTTACTATTATACACTAATGCTGAGTGTTCTCATGTGGTTCTAACACAATCGAATATGTAAGACGATCCATCGCTGGTAACATATATGGAAACTTTACTTTTTCTGCAACAGTTGAATGGCATTGTCTGGTCAGCGACCACCTCATTGTGTAGAAAGAGCTCTAGCTGTCGTAAGAATGTTTTACTTTATGTCGCATTGTCTTTGCAATTTATTTCGCCTCTATATTTGTGTTGTGTATATCTATTCTTTACGTATTTTGCATTTATAATTTCATCAATGCATATATATTTTCGATCGTTTTTCGTTGCT…	1.61176	Q5ZJJ2	RecName: Full=Replication protein A 70 kDa DNA-binding subunit; Short=RP-A p70; AltName: Full=Replication factor A protein 1; Short=RF-A protein 1
LYa_b1_contig_393526 (38..397) consensus	-104.869	0	CAGAGAACGAAAAACTTATCATTGAAGACAAATCTTTTATCCGAAGATGCTGATTAGTCCACAAGCGGCTACGCATAGTGGGGCCGATAGTCCCATTGTCTCTAGAGCAGTGGCACTAGCACAAACAATTGAGCATGAGGCTCCAGATAATTCCTTTCCATGGCCGAGGATAAAGTCCTTCACTTTGGTGTAAGCTTCATGAACTGACAATCGTTCCTCGTGGGATAACGTGTTGTATGCCTCCTGGTATTGTTTGGCTTCCTGTAAGCTTGCAGACAGGATGAATGGTAGGAGTGCAAGAAAAACGATTGCTACTTTCATGATTGAAGACTTGGTATTACGCTGTAGTGCCTTGGCTCA	1.17347	F7FIH8	RecName: Full=NAD(P)H-hydrate epimerase; AltName: Full=Apolipoprotein A-I-binding protein; Short=AI-BP; AltName: Full=NAD(P)HX epimerase; Flags: Precursor
LYa_b1_contig_176380 (104..2168) consensus	-102.003	0	TGCAGCAAAACAGAACAAAGCATATAATGTACACAGCAATGAACTGTCTGATTATGTTCTCGTTTGTGGTAACTCCGGCGACTTCATAGTTCTCATTTCAAATTCCGACAGCATATTCTTTGCGGATTCACGTGTCCTTGAGATAAAATTCTGAAGTGAATCAATGTAGAGAAGGTCATCTATAGCTCTTTTTCTTAGATCTAAAACTTTTTCGACAGATGTTTCCTCTTCATATATTTCCTGTAGCATCTTGGTTTTTGTTCCTTTTGCACTTTCATTGAATAGATGATTAGTCATCTCATCCATATAGTTCAAGATAGCAGTTTCAACAGTTTTGATATTTTCATTTGTAAAATATCTCATATCATTTCTCTCGGTAATTTCCTTTATTGTAGTGGC…	2.385e-07	Q8NHV1	RecName: Full=GTPase IMAP family member 7; AltName: Full=Immunity-associated nucleotide 7 protein; Short=IAN-7
LYa_b1_contig_257372 (1..979) consensus	-101.278	0	AGATGATAGGTTAACATCGAAAAAGCTAAATCTTCAACTTATGATATGCCTTCTTAGAAACATAGGACCTAAGTTTGACATAACAGATGAACTGCCAGCGCCGACTAGAGTTACAGTAGAGGCTAATTTATCCAGAATCAAATATTACAGAAACACAGTTTTGAATAATCATAATCATGGTACACTTTCCGATGAACTGTTCACTACAGTATGGGGAGGCCTATGTGAGGCTATAACAGGGTTGAATAAAAAAGCATTTGTGAAATACTCTAGTGCAAATGAAGACAATGCAGATGCTACTGATGCCGTCACAAAAGCATTAACAGAAACAATGCAAAACGAAACGAGTCATTCAAAATGGAGAGTAAGGACCATGACGAATGAAGAAAATTACTACTT…	1.38046	A1BDG1	RecName: Full=Aspartate 1-decarboxylase; AltName: Full=Aspartate alpha-decarboxylase; Contains: RecName: Full=Aspartate 1-decarboxylase beta chain; Contains: RecName: Full=Aspartate 1-decarboxylase alpha chain; Flags: Precursor
LYa_b1_contig_300860 (223..1442) consensus	-99.5641	0	CAACTGTCTCTATAGCTGTGAAGTTCTGTTTTAAAGGTATTATGTTAACTTTCCTGGGACCGTACTCAACAATAACACTGACAGTTGAAGATGTCTTACTCCCGTAATTATTTGTCGCCGTACACATATAAGTCCCTGCTTGATTACGATCAATGTTCTGTAGATGAAGTACTGATGAAGCTCCACTACTAATTTTTGGTCCTGTCCATGACATTGAACAGTTAGGATTACATTCAGCTGTGCATGTGATAGGACCAATCTCGCCTGTTGTCTCTGTTACCGTGTATATCAGTGTGTTTGGCTCTATGTTAACCTGTCCTGGTCCGTAATTAACCTTAATATTTACTATAACAGACATCTCACTGCCAATAATATTTGAAGCCTTACACCGGTAATCTC…	1.699e-12	P06731	RecName: Full=Carcinoembryonic antigen-related cell adhesion molecule 5; AltName: Full=Carcinoembryonic antigen; Short=CEA; AltName: Full=Meconium antigen 100; AltName: CD_antigen=CD66e; Flags: Precursor
LYa_b1_contig_90628 (37..608) consensus	-97.6011	0	GCTTAATGTCATGTAAAGAGAAATAGATAGACAGAGAGACAGGAAAAGTAGATGATTAAGAAAACAAATGTCATTGTTTCCATTCAATTGCTTTTTTCCCGACATATTCGATTCCCATAGCGACACCTGCACTTACAACTGCTGTAAGTATTTCTATAGTTTTATTGACGATCGTACTGGCAAAATTCTTGAAGTAATCCTTTGTTTTTTGCCCTAGAGTTTTCTCAGTCCAGTTGTAATCTATATCGCCGTTTGTCTTAAACCGCATTACTAGTTCGTTTTGTCCTTTTCCGTTTGTTATTTCAATAGGATTAATACCATCTAGATAAATAGTGACCTTCAAGTTAGTTATTCCTTGTACGATATCATGAATACCAGTTCGTAAGCTCGATAGTGTTT…	0.386177	Q8C9M2	RecName: Full=Coiled-coil domain-containing protein 15
LYa_b1_contig_436204 (304..665) consensus	-97.5329	0	AAATTCCCTTTCATCGTCAGGCGGCATTAACGCCACTGTTCTTTTCGCAGGACCCGTAGACCCATCTGTACCCATGGCAAATGGTTGCGTTTCCATTTCTGAATTCCAGTCACTATGATGCTGGAAATTATTCGATGCTGATGACCTCCACCAGCTAGGTGGCTGTCTAATACCAAAATATGAGAACAGATTCGATCTTTTCTCGTCCATATTTGATCTTGGACCAATTTCAATTTTACAATTTCTTTATTTTGAGTAAAATCGCTGATATGTCGCACAACAGCAAAATACAACTTTGTTTGTTAAACGAATCGTTTGAGTGTCGCACTTCTCAAGAACACGTCATTCCAGTTTGAGCGATT	5.41931	B7GH22	RecName: Full=3-isopropylmalate dehydratase small subunit; AltName: Full=Alpha-IPM isomerase; Short=IPMI; AltName: Full=Isopropylmalate isomerase
LYa_b1_contig_11011 (1..617) consensus	-96.8451	0	GAAATTCAATTACAGCATTATCATCAATGTCATTGTCTGTTGCCATTATCTTTTTGTCTTCTGGATATACTACAGTAGAGATAGCTTCATTTTCGTTCACTTTAAAGAAATAAGCTGAGCTAACAAATGTCGGCTTGTTATCATTTTCGTCTAGTATATGGACCCTCACTAAGGCAAGATCGCTTTCTGCTGGTGCAGCCTGGTTTGTCACAAGAATAACAAATTCATGAGTGTCGATTGTTTCCCTGTCAACCAGTTTTGATAAGGATACCATACCCGATGTTGAATGTACAACAAACGCCACGTTTGAACTACTCCTATTAATAATCGTATAGTTCAAAGTTACATCAGATGGTCTTGTGACTTTTGATGACACACTTTCTAATTGAAAGTTGATTG…	6.753e-17	Q91ZI0	RecName: Full=Cadherin EGF LAG seven-pass G-type receptor 3; Flags: Precursor
LYa_b1_contig_400037 (150..937) consensus	-91.9455	0	CTTCAATGTTCATTGTGTTATCGATTCACAAAGCTTGATAAAAAACAATGTCAAATGTTGTCCAATGTAAGCACGTCATTGATACGAGAAATAATTTTTTTTCTTTTGAATTCTTGTAACGCTTTCACTGTGCAAAAATTACCAAGAGCTTTCTGAGTGATAAATCCAAGACCCTTTTTTTCATACCACGATGTGGTGTCTGTGTAATAGGGAATACCAATGAAAGTGCTTTCTTCTGTTTTTGTAACTAATGTTGGAGCAATAGTAAAGTTAAGTGTGTATAAGCAGCTAACTGCATCCAATGTACCATTACATCTCGTTATTGCTACCATCCCTAAATGTACCACACCTGAATCCAATTCGTCTCCAAAACTGAACTTGACGATCTTAACGTCTACT…	0.348709	Q6A7M5	RecName: Full=Translation initiation factor IF-2
LYa_b1_contig_297425 (404..1824) consensus	-90.8613	0	AAAAACAAAAACAACGTCTAAGCTAAAACATAAAAGCATAACACTTTCCCAATAATTTTGGATTCACATATATCAGAAGGTTTTACGCAGAGGACGGATGTCATGATCCATAACATCCCAAACCTTCTGGTGGTAGAGCTTGCAAAAGCTACAAATATTCATTTGACAGGTATTACACCAATTCACTGCTCTGTTCCTATTTGTACAGAGCTGACATTTGGTCGTATTGGTAAGTTGAAGATATTTCTCCTTCTTTAATTCTCCATTTGTTTTCATTGAAACTGGCCCAGACGTATCTTGAAGGTTCATTTCAATTGAAGTTTTCCCATTATCACTGCGAGATACGTATCTTTTATACTGTGATTTCAATCCTTGATAAATAGTATGTTTCCAATCCGT…	0.590486	F6QEU4	RecName: Full=E3 ubiquitin-protein ligase TRIM71; AltName: Full=Protein lin-41 homolog; AltName: Full=RING-type E3 ubiquitin transferase TRIM71; AltName: Full=Tripartite motif-containing protein 71
LYa_b1_contig_344701 (27..956) consensus	-90.7929	0	CGCTTTTTGCAAGGGTAGACGAACTAAACAGTATACTGTACAACAGAGTGCATTTTTCAGTAGTGAGTTGTTTCCGGAAAGTCGTTGTGTCAAGATTCTTAACCTTTGTTGAACATTGTCATAAGGAAAGATTGAGAAACTTCAAACATGGATGAAAGAACAAGGTTTGCAAAATGTTTCGTAATTACGGCAGAGAACTGCAAATCTTATGTCCTAACGTTTGTTGAAAATAAAACCAACAAATTAGGTCAGACGCTTGACCAATTTATATTAAATCATCCAGATATTAAAAATGACCGAATGGTAAAACAGGCTTTAAAGAAAAAGACGTCCTCCAAAGAATTAGATATCTCTGTCCTTTGCGTAGTTGTCCGGAAAGGAAAGCTGCTCGAGACAAAG…	0	not available	not available
LYa_b1_contig_290451 (44..339) consensus	-88.8377	0	GGGGCAACTGCTACATGTCCAAATCGGTGAACCAGACTCTGGAAACTTTTACAGATCAATGGACATCCGAATTGAAGAAGATGATCTGCTTTGATGAGTGTGTGGCATTCAGTTTCACATGCCTGTTCAGTTGCATCAGTACCTACTGTACCTACTATCCCGTCTACTAATGTTTTCAGTTCATCAGTTTGGAATAACGTATCAAAAATAAGTCTTTTCTGTGGTGTAGAAAATACTACTGGTAACAACAGCAATACAGCAAAAGCAAGTTTCATCTTCAAGTATTTAGCTGCTTA	3.50441	B7IHI2	RecName: Full=GMP synthase [glutamine-hydrolyzing]; AltName: Full=GMP synthetase; AltName: Full=Glutamine amidotransferase
LYa_b1_contig_436213 (117..967) consensus	-85.9572	0	ATAACTTTAAACGATGTGTTGTGTTTGATGAATTATTGGTACTTGCGAGTAAGCCTTAAAATACATTAGTATGTAACAATGCTGATGAAACGTGTTTCGTTCCTTTTTTGGTTTGTTTTACGATTATTCTCCTCTTTATCCCTTTTCACTATTAATGGTATTCACATATGAATGGAATATCCAACAAGAAAATAAATAGCATTCTTATATTCTGTTTTGCTCTAGTTGCATACTTATTCAAAACAATATTTGTTTTTCATGTTATTACAGAGTCAAATTAGGTTCCTCTAGTTGTATAGTTAAAGCACTGCATTTTCTTTTGAGGTTTTTGAAAGACTAACTGTGATGTAACTTCTATTTTCGTCTTCTTTGTAGAAAATCATAGGGTTGCTTCCCTCA…	0	not available	not available
LYa_b1_contig_296174 (35..305) consensus	-83.8038	0	AATCAGTGTTTGATAGGAGTATAGAAAAATATCCAACCTAAGTGAAAATATGTATATTTTGATTGTGTTCGCAGTTATTACGTCGTTCGTTGCAGTAGAATGTAACGAAAGCGTCCAGACATACAGGGTTAATGTAAAAGTGCCCGGAGGACGAATCAACGAGGATATCACTGTCGACCCAAAAGAAAATACTATGACTGTCAATCTCGGAGACGTATCTCATCTTAACAACTCATTTTGTCCGTCAATTAATCTTCATGACTTCGAAATG	0.108559	Q29TV8	RecName: Full=Gastrokine-2; AltName: Full=Blottin; Flags: Precursor
LYa_b1_contig_5938 (655..1481) consensus	-80.31	0	TCTAAGCTTCTAGGTTACATAGATTATTTTCAATCTGTTTCAGGTAAATGCTTAAAATATGTTGATGAACTTGCCTGTTGCAAACGCATAACTGATGTAAAGAGTTATCTCCCTGAACCAAGGTCTACCCCCTTAATTAGAATTAAAATGGGTAGAGGTATGAAGAAGACATTGATACTTGCCGTTGTGTTTGTTTGTTTATCATTGGTTAATGGTCTAGATGAAGAGGCAGTTAATGAAAATGATATTAAACAATACCAAGATTGTGATGCTGCCAGAAAACTTGGAGGTTACCAAAAGAGTGGTGTATACAAATTATGGATGAATACAACAAAGACCTACTTCAAGATAATCTGTGAGCATACACCCAACAACTCCTTCAATGTGATTCAACGCCGA…	3.336e-33	Q8NI99	RecName: Full=Angiopoietin-related protein 6; AltName: Full=Angiopoietin-like protein 6; AltName: Full=Angiopoietin-related growth factor; AltName: Full=Angiopoietin-related protein 5; Flags: Precursor
LYa_b1_contig_321752 (56..409) consensus	-78.8059	0	GTGACAGATAAAGATGAATGAATGATTGGTAATGATTTTTTTATTCCAGGTCCCAGTAAACTAGAATCTGGTGCATCTGCAAGTACCATCAATGCAATGACGACGGTTCATTGGACAATCCCAGTTAGATACTGCATCACACTGGGCTTTAGTTGTGCAAGTGTTTGCAGTGTTTTGAACACAAGTACACTGTCCACTATTACAGGCCAAATGCCATCCCTGATCACAAGTGAGATGAGAGCACTGGGTGTCCAAGTTATTGTTGCCTGAACATGTCTCTGCGGTAACATATGCAATAAGACAAACAACGAAAAGAATGGCGGTCCTCATGTTTGAGACTTTGCTAACAGTATG	1.218e-06	B9A8D7	RecName: Full=Serine protease inhibitor Cvsi-2; Flags: Precursor
LYa_b1_contig_31532 (167..2360) consensus	-77.0184	0	GTATGTTAATCACGGTCAGTCCAATATGTTTTAACTCTAAAAATCAAGAAACAGTAAAATATGTAAAGACAAACTGAATCGCACGACAAACTGAAGTACTGTCTCTTGGTTATCAAACATTGCATACACTTTTTTCATTAGGACAAAGATCTAAGTAGGAATAATTTGAATGGAATTGGAATAACTTAATTATTTTTCGAAATTGGTTGATTGGTGCTTTCTTCATCATTAAAGCTCTACATCAATCGTACAGCAGTAAGAAAATCCACCAATGACTGTAACATGGCAGCTCCAGACGGGTTCAGAATTCCTGATTTCTCCTGAGCTATAACGAGGTCAACTACACTTGATGGTAGCGGTGTTGCAATTTTAACTGCACGCTTCAGATAGCCAGCTCGG…	0.0009789	A2ASS6	RecName: Full=Titin; AltName: Full=Connectin
LYa_b1_contig_13004 (1..498) consensus	-75.1503	0	ATACAAGATGTCACATTATATCAACGCCGAAATCAATGATTTTCATTTTCATTTGGTTGTAAATAGCAGTGGTGTTATAGCAGTAGATAAAGGCAAGGCAGCGGCTGGTAATAAACAAGCCTTATGGCAATTGGTGTCAAAGGGCGATAACATATTTACAATAAATAATGAAGGAGATGGCAGATTCGTCGAAATTCGGGAAAATGCGATTGGTCTTGCCTTAGCAGCAGGCAACAACTCTCGGCTCAATCTATCTGATGGGATCTCAAAAAGCACAATAATATCGAATTTAAACGAATCCCCACCTATAACGATGATTATTGTGGAAGACCAAATGAAGGTTGATACCCAAATTGGAATCAATGGCCAAAAGTGGAACATTACTCCGCAATGATTAAC…	1.58027	P40617	RecName: Full=ADP-ribosylation factor-like protein 4A
LYa_b1_contig_49608 (949..2617) consensus	-74.9596	0	CTCTATAATTTGAAATTAAACCGACCTAGAAAATTTCAATTGCACGATGTCATTGTCTGTTTATATCTACATTAATGGTTATACCATTTATCGGAAGTATTCGAAGGTCATCTTGATAGTTTACTAGATGGCGTCAAGACTAAAATACTCATAAAACGAGGCTACATATTAACGAGTTGATGCCCTGTAAAGTGTTTATTTTAAACCTTTTTTTAATTTGATTGATTGTTTTGCATTGTTATGAATCAAATAAGATAAATTGAGTCTAATCAGTGAACACGAATCGGACTGCTAGAGCCCCTTACACGTAAAAGTAAAGGTAGATTACAACAATTCGTATATGTTGTTAGCGAATACTACGAAAACAACCATGTTTTGTTTGCAATATGAATATGTAAA…	0.18178	Q9LJW7	RecName: Full=Receptor-like protein 43; Short=AtRLP43; Flags: Precursor
LYa_b1_contig_259477 (1..938) consensus	-73.4062	0	CAATAGTGTATATATTCATCAACCAACGTATAACGCTCATAGGCATTGAGTCGTCCACATATTAAATGATTTAATAATTTAACGATGGAGACAACGTTGACATTTGATATCTTCTTAATTGCATCAATTATTATTTCAAATTTTTTTGGTGATGCAACTACAATCGGATGTGATAAAGTGTGTTGGACGGTTGAACAGAAGACTTTAGTATTTGGAACAGATGTAACATTGGTAGGCAAAACAACAGATGATACAGATTTGTGTACAAACTGTACAAAAATATGGACTGGAGGTCATGATCAGTCACTACTGTCCCTTAATGGATATCCATCAAAGGAATCTTCGAAGTATTGGCCGACAATAGGAAAGGATGAATTTGTAATAACTATCAAAAAATTC…	1.90683	Q1KKX5	RecName: Full=Homeobox protein Hox-B1a
LYa_b1_contig_296978 (22..1359) consensus	-70.6401	0	CAGTGTTAAATAAACTATTACAGGTAATGATGAAAAGACAGATCAATCCTGTAATATGGTTAAAATGAAATGAAAGACAGGGCAATCTAGCTTGAAGCATAGATATCAAAGAACGGAACATTCAATCATCAAACATGCATTTTACTATGATTTTAAGAATGCTGTTATGGCTTGTCAGTGTACAATTAAAAGATGCATCGTTACCCCAAGATCATGTTTGTTTATCTTGGGAAATACAAAATAGCAAGATTGTATTAACCTGCAAAACTGATAACCTATTTTATGCAGTGACGTTTTACAACCCAGAGAATAAAGAAGTAGCCTTTTGTACTCTGACAACATGTCGTTCACATATGACCAAATTGAATATGACTATTTCACAAAACAACAGAACACAAC…	2.94849	B8GX12	RecName: Full=Lon protease; AltName: Full=ATP-dependent protease La >gi|239977153|sp|P0CAW0.1|LON_CAUVC RecName: Full=Lon protease; AltName: Full=ATP-dependent protease La
LYa_b1_contig_134296 (3388..4833) consensus	-69.6454	0	CTTCAATGTCAATGTTAATGTTTTTGTTTTCAATTGGTAATCTTCATGTCACATCATGGGGGACAAGAGAAAAAAAAGCAGAACAAAAAGATGACGAAAAATCAAAGAGAATAAATGAAAAAGAAGAAACAGGATATTTTTGTTCGCTGGGGAAGTTTATCAGTTGTTTATTATGCCCCTCCAATGATTACACGAAAGATGAGTTCCTGTACAAGAACTTGGTCAATGAGATGAAACGCATTGTTCATAAAGAGGATGACACAGAATCTAGACCAGAAACAATAATCAACATAATTGAAGAAAGTCACGTAACGCAATCAGAAGAAACACCAAACACAAATAATTCTGCAGAAAAAAATGATGTACGATTAGAACATGAAGAATCATTAAACCCGAATA…	8.647e-05	Q8T5G8	RecName: Full=Chitin synthase; AltName: Full=Chitin-UDP acetyl-glucosaminyl transferase
LYa_b1_contig_33668 (1..334) consensus	-69.5155	0	TAAAGACGACTGCAAATCAACTACTGAAAAGATGCCTAGTTGACAATCAACCACTAACCAAATCCAAACTAGAGAACTCAAGATGGTATATGGTGTTTCAACTGGTGATGCAACCAACCAACCAACCAAACAGACACGTGGAAATGGTAGATGCAGGATGGATACCTTTGGTGACTATGAACCAACTGATGAACCACACCTGATGAACCAATTAGTAACCAGACAACAAACAGATACAGTGTGTGATGTGTGAGGGGACTGTGACCAAGACCAAATTCCAGAAGAGAATGTGGTGAAGCAAAAATTTAACAATTTGTAAAGGCAGCATGAATTG	3.58103	Q9NJN5	RecName: Full=DNA-directed RNA polymerase subunit beta; AltName: Full=PEP; AltName: Full=Plastid-encoded RNA polymerase subunit beta; Short=RNA polymerase subunit beta
LYa_b1_contig_298948 (161..1995) consensus	-65.3915	0	AGCACATAAAAATACTTCCGAAAACGTAAAACCCCGGAAGTCAACAGGTAAAAACAAGAGCATTTGTTTGTTTTGAAATGATACCATGTCGATCCTAAATTTTGTATTTCAGTGCAACAATTTTATCATCTTCGTCATCTCCGTGTATGACTTGAATGTACATTTTCGATTTTGCTTGACTGTATGCAATGTAACGTGGTGACATTATATCTCCATGTGATGCTAAAGCGAAACCGTAACCATTCGCTGCGTTTATTTGATAGACTCTATTACGCCTTTTGCTTGCAAGAAATAATTTACCATGTCCTTGTATAAACGAGATACCCCTTGGACTGGTAAACTGTTGAGTCCATATTTGTTTCCCCTCAAAATCTAAGCATGTAACTGCCTTTTTACTCA…	0.650035	F6QEU4	RecName: Full=E3 ubiquitin-protein ligase TRIM71; AltName: Full=Protein lin-41 homolog; AltName: Full=RING-type E3 ubiquitin transferase TRIM71; AltName: Full=Tripartite motif-containing protein 71
LYa_b1_contig_16501 (432..5149) consensus	-63.5653	0	CCAATTTCTGATATAGATTATGGGTGGGTGTATACTTTTATAAGCAACAAATGATTTGAAAGGATAGAGCATCTGCCCAAGGTATTATACTCCAAATTCAAATGAGTATAGCTTTACATTGTGTCAAACACACTGGTTCAATTTTGTTTTTGACTTTACATTATATCCTCTTTGTTAAGCTATTCTTTCATTCTGTATAAAGTTTTCATAAAACGACTATGCATTTTCTTTCAGTACACACAATATGGAAAATTCCCATGCAGATGTAACATTTGGAAATTTGTCTGTTTCCGTTTGAAATTTACAGGCTCGTTCGATTATGATATCACGAGTGTAGCATGTACGCGAAATAGCCTCATAAATGTAGAGTGGTTCTTTCGGGTTCTTTAAATTATATAT…	0.748061	Q0A7F4	RecName: Full=Putative phosphoenolpyruvate synthase regulatory protein; Short=PEP synthase regulatory protein; Short=PSRP; AltName: Full=Pyruvate, water dikinase regulatory protein
LYa_b1_contig_233077 (70..3243) consensus	-62.8067	0	CACATAAATACGTAGGATAATATAGTCAACATAATCTATGTATATGTTGATAAGCTTCTTTTCACTGTTCCTCAGTGGTGTGTTTTGCTTTATCATCATCGCTGTCACTTTCAGATGGCAATGGCTCTGCTGTCTTGGTAAGGTCAATAACTGCATAGTTGTTTCGGTTTTCCAACCCTCTTATAACAAACCGGTTTCCACTCACCGCAGACACCAGATCAAGATCTGCGTATATCAATCCATCCTTATTTTTTGTAGGTGTGTACACCTGTTTTTCGTTATCTTTCACTTCAGAATTTGCATATACGTCTTCCGTCTGTCGTTGATTGATATCTTCAGAGTTTTGATAAACACATCCCATTTCTATTTCCTTATTCTTCTTATCTTTCTTTTTATTCT…	1.914e-20	D3YXG0	RecName: Full=Hemicentin-1; AltName: Full=Fibulin-6; Short=FIBL-6; Flags: Precursor
LYa_b1_contig_387172 (1..430) consensus	-62.6947	0	TGATATAATAAATGTCACTCTCCCTACCTATTCGATTGATAAGAAAACCATTATGCTCGGACTGGATGTAGGAGCCTTGATTTCAGCTGTCTGGATTGTTGTCACAGGAGTTCTCCCAGGTTATATGGCAAGACATGCAGACTACAGCTTGATAAAAACTAAAGTGTATTTCATGGTTTTTAGCATTATGGCAGCATCCTTCTTCGTGCCCTTGATTTTTAGTGCAGCATTAACTAACTTTATACTGCGTGATAGCCACAGGGAATTGCTTATCATAACAGGCCTTTTATCCCTTCTAGAATTCATTGTGTCCTTTGCGGCGTCAGTACACTGCTGTGCATCACCATGGGCTGCATGCAAACTAGAGAAGAAAGACAAACAAGTGAGAAGTGAGCAATA…	2.0474	Q9Z2A9	RecName: Full=Glutathione hydrolase 5 proenzyme; AltName: Full=Gamma-glutamyl leukotrienase; Short=GGL; AltName: Full=Gamma-glutamyltransferase 5; Short=GGT 5; AltName: Full=Gamma-glutamyltransferase-like activity 1; AltName: Full=Gamma-glutamyltranspeptidase 5; AltName: Full=Leukotriene-C4 hydrolase; Contains: RecName: Full=Glutathione hydrolase 5 heavy chain; Contains: RecName: Full=Glutathione…
LYa_b1_contig_236125 (1..281) consensus	-62.2182	0	ACCTTGAAGATGAAACTTGCTTTTGCTTTATTGCTGTTGTTACCAGTAGTGTTTTCTACACCACAGAAAAGACTTATTTTTGATACGTTATTCCAAACTGATGAACTGAAAACATTAGTAGACGGGATAGTAGGTACAGTAGGTACTAATGCAACTGAACAGGCATGTGAAACTGAATGCCACACACTCATCAAAGCAGATCATCTCCTTCAATTCGGATGTCCATTGGTTTGTAAAAGTTTCCAAAGTCTGGTTCACCGATTTGGACATGTAGCAGTTGC	2.76735	F4I718	RecName: Full=Protein CELLULOSE SYNTHASE INTERACTIVE 3
LYa_b1_contig_367140 (1..238) consensus	-58.2375	0	GTGAAGTTATGAATGCTAAAAAAATACCATTTTCTAATATAAATGGGTATTTAGATTATTTGCAAGGTGCATATGAAGGAATCGATGACGAAGTTCGGAAGGACATTAAATTCCAAATTGTTCGAAGAAAAATCATGGGAATTCAAAATGGTAGACTGGAATTTTAAAACCCCTGATGACTCAGGGATAAGATACGGAATAGTGGCGTTCGGAAGATCTAAAGACCAGCAATTTGTCG	0.745106	Q8XIY6	RecName: Full=Putative pyrophosphatase PpaX
LYa_b1_contig_192571 (410..612) consensus	-57.2829	0	CTAGCTCTTCATTCCCGTTTGTGTCAATTTGAGGTATGGCTAAGTTGAATATTTGTCTCCATCGACTCCGGCTGTAGTCCAGTCCAGGTATGTGTGCATTTGCATAATATGAGGCATACTCATTACCAGTAATGTGTCCATCCCTATTTGTATCAATCCTCCTGAAAGCCATGGCAACGGCATCTCTCTTTACAGTGTCTCTC	0.0225732	P06495	RecName: Full=Calerythrin; AltName: Full=Calcium-binding protein
LYa_b1_contig_6935 (2339..4426) consensus	-56.9304	0	ATACAAATAACGATATTGACAATATGACATGCTCTATAACCAGAACGGTTACATTTGGGTTTTTGTTTACAGCTGATATGGACAAGGCTACCATCCGGTGTAGTGTTACTAATGATTTCGATACCGAAGATCCGTTTGTTTACTCAAACAATGATACAGTTTCCCTTATTCCAATTGATTTTTGCAAGAATCAAACTGATGCACAAAGTTACCATCCACATCCAACGAATTGTCATAGTTTTGTTCAGTGTGAATTAGACGTAACATATGGCATACCTTGTCCATCGGATCAGTGTTTTGGAGTCACGGAAACAAATGGATGTAACTACTGCTATCTGGCTACGTGTCCGGCAGATGTAACTACAACACCACAACCTGATAGCAGTACATCGACATCTG…	0.222873	P29030	RecName: Full=Endochitinase; AltName: Full=MF1 antigen; Flags: Precursor
LYa_b1_contig_14512 (1..241) consensus	-55.4976	0	TATTCAAAAATTCCGCTGCTGAACCACCGATACTGAATGTCACTCTACTATTTTCTCCAGAGTCTTCATCAGTTACTTTAAAGACCTCAATAACACGTTCCGCTGCTGATGATAAATATCTGATAGTAATTGTAGGTGGAGGAGATTTGAAGATTGGAGCGTTGTCGTTGACATCTTTTATATTGATGGTAACATTCTGTGTTGAACTTAATGGAGAAGAACCATTATCTTGAGCTTTAAC	1.803e-09	Q9HC56	RecName: Full=Protocadherin-9; Flags: Precursor
LYa_b1_contig_1188 (14..713) consensus	-53.4454	0	GGAGAACTGAAATGGGGTTTTATATAAACAAAAATCTATATCATTTTAAATCGTAAAGCGTTGAGTCTACCATAATACGATGTTTGCCTTTTTGACCTTCTTCGCCATTACAATTTCACTGGTATGGACCTACCAGTGGACAATGGAGGATACTATATGCAGTTTGTGTAGTAAGCGTCAAGTGCCCAACGGTCATCCTGACCTAACAGCGCTGAGAGAAGCTGTAAAAGCCAATAGAAAAGACATTGAAGTACAAAAGAAAGAAATGCAAGATTTGAAAGAGAAGCATAGTCACGTAGCCTTCTTTGCTTACATGAGCAATAACTGGAAACAACTTTCTAAACACAAAAGACTTGTTTACAATGTAGTAGATTTGAATAATGGAAACGGATATAACCA…	0.0002541	P83425	RecName: Full=Heavy metal-binding protein HIP
LYa_b1_contig_357953 (41..356) consensus	-52.9891	0	TCCTTTTAAAATTTCTAAATCATAAATCACAAACATATTTTCAAAATATAAATTCGTATACGTTACAAAAACATGTTGGTGCTAAATGCAATGTTAACAAATGATAATGTCTTACAATTGTTGAAAATAGTCCTATCATGGCATATATATTTCACATTGCTGTTTACATGTTAATGATATGAACTGTTCTTCTGATTGAATCAATTACTATTCCTCAAGAAGTTCATCCACCATAATTCCATTTGTAACCGCAAAGGGTGACACATGTTGTTCTGCAGTGCTTCATTTTCTTACAATATGAACAGCTGCCAAATGT	0	not available	not available
LYa_b1_contig_260615 (11..1208) consensus	-50.8231	0	GATCGTATTCCTCGCTGCCTTGGCTGTTGTTTTTGTACAGAGGTCAGAATGTGCTATCAAAACATGGCCTAATGGAGTTGTTCCAGTTGCCTTTGATGATAGCGTCGATGGCTTCGCCAAGGAAAAGCTGTTGGCATCAATGAACGAAATCCAGATCAGCACAGACAACTGCATCCAGTTCGTTCCACGGGAAGCCGAGACCGACTATGTTGAATTTTCAACAGTTAACGGTCTGACTGAAATCCCAGTACCCGGTGTAAACAATGGAAAACAATTTGTTAAAATTGCAGACAATCTGGAAAAAGCCGATATGATGCAACTCTTAGTATACAGCTTAGGAATGTACAACACATTCAGACGACCAGACAGAGACAGCTTTGTCAATGTGATGTACGACAA…	5.836e-22	Q16819	RecName: Full=Meprin A subunit alpha; AltName: Full=Endopeptidase-2; AltName: Full=N-benzoyl-L-tyrosyl-P-amino-benzoic acid hydrolase subunit alpha; AltName: Full=PABA peptide hydrolase; AltName: Full=PPH alpha; Flags: Precursor
LYa_b1_contig_35196 (35..924) consensus	-50.7347	0	AAACTTGTATCTTTTATAACACCTGTCACAAGTATACAGCCTCTTACATAATGGAAATATTAACTGGTGTAATACTTGATCTGTCAGATTCCGTTAGACAAAACCTCGGTAGAGAAGGAGATGTAAAAGAGGGTGAATGGGCTCGTTCCATTTTTGAAGTAATCGATAATTTCGTTAAACATGACGTTTCTGCTGATAATCATATTTTTGCAGTTGGTGTTGGTGCCAAATATGGCAATGGTATTTTTGATGTTATCAAAACAATCGAACCATTCCAGACTTCTAGCACGCAGAAAATACAGCTTAGTTACGATGCAATTTTGGAGGAGTTTTATAATCTGGTTGGAGAACACGGTGCAAGTACAACAAGACATTGGGCGTCTAAAGATGTAATAAAAA…	1.88178	O58394	RecName: Full=Endonuclease V; AltName: Full=Deoxyinosine 3'endonuclease; AltName: Full=Deoxyribonuclease V; Short=DNase V
LYa_b1_contig_400254 (1..248) consensus	-50.6682	0	TTTTGATCCAAACTTTCTCTCCGACACTTCTTTATCTGTGGTCGTCCACGAAAAGAGACCCCATAAAAAGGAATGTTTTTTTTCTACAATATCGGTTTTTTTGGCTACTTTGAAATCCATGTTATACAGTACATACATGCAGTCATAGTATTTTTTATCGGGCGATTTTCCAAAAGCTATCAATCCATACTTAGCTCCCGAATCTTTTCCAGTATTGAACTTATATTCTAAAATTTTGAATTCCCAAG	0.864873	P32600	RecName: Full=Serine/threonine-protein kinase TOR2; AltName: Full=Dominant rapamycin resistance protein 2; AltName: Full=Phosphatidylinositol 4-kinase TOR2; Short=PI4-kinase TOR2; Short=PI4K TOR2; Short=PtdIns-4-kinase TOR2; AltName: Full=Target of rapamycin kinase 2; AltName: Full=Temperature-sensitive CSG2 suppressor protein 14
LYa_b1_contig_349591 (1..3356) consensus	-49.7088	0	TCCTAAAATAGCCGCTATATTATTCGATTCTGTGTTTTCATTTTTTGGAGTACTGATATTGCTGGCTTCCGTTTTGTATTCAGATGACATTGATTCCGTTGACATTAGAGTTGTAGAACTTCTTGTAGTGGATGTTGATTCTCTTGGTGTAATTGATGTTTCAGAATTAAATGTTTTGGATTTAGCTGTAGTGCTTGTAGTTGTAACTGGGGGAACATTTGTAGATACATATTCTGTCGTAGATTCAGTTGTTGTTTCTATGGGACATGTATCCAGTTCAATGCATGTATTGTTTTCCATATAACAGGAAAAACACTCTAGGTCGTAAATCATAATTTTCACGTTGTCGCCAAAGTTATTTCCGTCAGTAGACAAACTGATTTCATAACCATCAGCTAT…	6.855e-16	Q6DFV8	RecName: Full=von Willebrand factor D and EGF domain-containing protein; Flags: Precursor
LYa_b1_contig_296251 (476..1247) consensus	-49.594	0	TATAAAAATAAGCAAACACGTCAATAATAGCAGCAGTATTCTGAGTTATACATAAAGGATAAATATAAGATTAACGTAGAACAATGTCATAACTCAGCATTAACATCTTGGGACTACGCTTCATTAATGGCTTTGACTACTCTTGCAGCTTCTTCAAATTCCTTTGTCACCAGATAGCGAATGAAATCTTCAAGCTCCTTGATAACAGCAGTAGAAATCCTTTTAGCTTCACCGCCTTCACCTTGCTTGGTACTTGTGAAGATACCAAACAGTATTTCTCTGCGTATTTCGGCAGCCTTTTCTTTATATAACACGAAATCAATTGTACAACCAACATAACTGAAGTTATACTTTCTATCCTTTAGCTCAATTGCAATCATCAAATATATTGCGTCGTTG…	2.11421	Q9CQS3	RecName: Full=Fin bud initiation factor homolog; Flags: Precursor
LYa_b1_contig_164247 (1..2164) consensus	-49.4716	0	AAGACCAGAAGAAAGATGGACAATCAGTACTTCACTAAAGAAGCTTATTCTCTTGAACAAATGAAAGCGGAAGAGTTGCGGACAAGTTTTCAACGCGCCTACAGCTCTTCAGAGAGTCATAGAAGCACATTTGCCAGTTCTAGTAAATTCACATTTAAGACTGGACCATCCCCATTGGAAGACCGACTGTTTGAATTAAACACTCGTACTTTATCCATAGTAATAAAAAAGATTGTGAAATTTGAGGGAGAAATATGGAAAAAACTTGAAAGTGACTGCACGAAATACGGTATTGCTTTAGATAATCTCAAAAGTGAATATGAGGAGGATTTGAAGAAGGCAGATACGCTGGGTGTTGAAGTTATCACTCTACAAAATAACAACAAAAAATTACAAGAA…	5.35635	Q9BV73	RecName: Full=Centrosome-associated protein CEP250; AltName: Full=250 kDa centrosomal protein; Short=Cep250; AltName: Full=Centrosomal Nek2-associated protein 1; Short=C-Nap1; AltName: Full=Centrosomal protein 2
LYa_b1_contig_55418 (1..282) consensus	-48.8812	0	CCTTTATATATTGTTCACCGTTTCTTGTTTTCTGAGCCCATGCCTCAGGATTGTCACCATATTTAGGATACACATTAGGTGGTCCTATGACTTTAGATGCCGACCATTTTTTTGCAGTGTACTGAGAGGAGTATGATATGACCTTGGATACCCACTGTTCAGTTCTTTTCGGCTTACTTGAACGTAAGCAACTCTGTTTCTTTCCAGTAATTTTTATTGCATCAATTTCCACATATGATTTTGACGCAGTACAATCCACGTCAATCCTCAAAACCTTACATG	2.94536	P0CN87	RecName: Full=Multifunctional tryptophan biosynthesis protein; Includes: RecName: Full=Anthranilate synthase component 2; Short=AS; AltName: Full=Anthranilate synthase, glutamine amidotransferase component; Includes: RecName: Full=Indole-3-glycerol phosphate synthase; Short=IGPS; Includes: RecName: Full=N-(5'-phosphoribosyl)anthranilate isomerase; Short=PRAI
LYa_b1_contig_161109 (1..1985) consensus	-48.7979	0	ACGGGGTTTGATTCGGGCAACAGTGATCCACCTACTGGCAAAGCCTTACTCACACATAATGTATGTTCTAAGAGATTTTGAATTGACCTGTCTCCTGGCTTTTATTACTGTCTTTTGTGAAACAACAATAAAATGGGACATCAAAGGAAAATATTTGATATATGGACAGAATGCAACGCTGACTTGTAATGGAAACTCTTGTCCATCGAAGGCCATAAGGAAATGGCTTGGTGGACCAAACTACAATCTTTTATGCTTTGATAACTATTCTACAGAACCAAGAAAATATGAAATGATGTCAAATAATACCAGACCAGAATTTGAACTAATGATTAAAGAGTTCGATTTCGATGATGCCAGTTGTGAATACACGTGCTCTTGTGGATTCTTGCAATACAC…	6.31728	Q7MRK6	RecName: Full=Outer-membrane lipoprotein carrier protein; Flags: Precursor
LYa_b1_contig_381212 (70..319) consensus	-46.8092	0	GGCTGCTTGTTGACAAACGTGTTCCTCGAATGAAAAGGATAATGGCTGAAAAAAAGGAAAAGGAAAAGGACAAACTTGAAAAGTGTGAAGATGTTCAGAATGGAAAAGCTGATGATAATTCTACGGCAAATGCTTTGCAAAAATGCTTTCATTCCGTCAAAGTGTCAAAACACGATGCTACGGAAGTACAGCGTGGAATAGAGGGAGAAATATTTGACAAATGGTCAGAAGGATGTGAAGTTATGAATGC	3.96332	B2IVX7	RecName: Full=UPF0176 protein Npun_F6152
LYa_b1_contig_168801 (13..472) consensus	-46.2003	0	GTTTCGTGGCAGCTAGTGCAATATGCAATTACCCATGTTTCCGCTTTGATGTAGGAACTTGGGTTAATGACAAAGATACATTTGCCTTCTCGTGTTCAAATATGTCAATGTTAACAGTAAATGGTGTGGACGAAAAGATGTGTTTCGAAAGACGTGGACCATTTCTTGTATCAAGATCGGGAAATACATACACCTGCATGAAATATATTGTTGATACAAGTACAGCCAAAATATCCCTTGTCTATGCTACAAAAGCAAATACATATTCTCATGAACCATCCATTTGTGAAGTTTGTTCAGGAAGATATTCACCATACATTTTAGTCGCAAAAGGTCAAAGTCACGAGCGTGCAAGACAAACGATCTCGGCACCATTAGGATGCAACAGACCATATCTGT…	0.352972	Q7VQX1	RecName: Full=ATP phosphoribosyltransferase; Short=ATP-PRT; Short=ATP-PRTase
LYa_b1_contig_239743 (1..327) consensus	-45.4144	0	GGTATTCAGTGTACAACAACTAAATAAAATTGGTAATCACAACTGTTGATTACGCAAACGACGAACAATGTTCTTAAAGCTTATATTACTGTACGAGATACATACACCTTATCGCTAATCCCGGCTGACCCGAGAATCTTCCGCTTGAACTTTTGACATCATACAACAATCACTTTTCCATTGTGACATCAAATATTTTGTATTATGACGTCAAACTTTACGGGATCATGTGTGATGACCAGTAATGGCGGACAAATAGCGATAATGTGTATTAAGCAAACGTACTTTCATTTAAGTGTTTAGCAACTCTGTTAGTTTAAAATAATT	0	not available	not available
LYa_b1_contig_89849 (31..1967) consensus	-45.1656	0	AAACACATGTACACCTTATAATCATTCAATACACTAAATATAGTTGGCCTATTGCTTGTAGTTTCTAAGAACCAGACAGACTTAACTAAAAATAATAAACATTGACCAATCGATTATGAAAATGAGGTATAAGTAAGATGAAACATACCAGGCAGAAATGTATAGCTTTTAATCATTCCATACACCAAATATAGTAGACCTTATACACACAGTATAAGAAAAACAAAGCAAAACACAAGAACTTAATTATAACCACTGAACCATAAAAATGAGATCCGGGTCAGATTACACCTGCCAGTTGGACATGTAAACCTTATAATCATTCAATACATTAAATAATAGTAGACCTATTTCATAAATGATAAAATGAAAAACAGACCAAATCACAAAACTTAATTA…	0	not available	not available
LYa_b1_contig_187284 (14..2019) consensus	-44.9983	0	GTGTTCGTATTTGGTATGGCACAGTACAGTTTTGTACATATGGAGGAATAATCTTGGTTGTAGAAGTACCTACACAAATGTGAACCTGTACCACGTTTTTGTACACACAGCTGATCAGCGTCTGTTGTAGGCTGAACTGTTGTAGTTGTTGCTATTGTTGTTGTAGTAGGAGCAGCTGTTGATGTCGTAGTAGGGGAAGTTGTTGTCTTTACAGGAGTTGTTGTTGTCGTTGCAGGAGTTGTTATTGTCGTTGTTCTTATAGATGCACATGAAGCACAGCATGCATTCGCATGATCTGCACACCATTGTGGTGCTTCCCTGACCATATCTGCACAAGTCCAACCATTGGTAAAATATGTACCTTTGCGATCTCCATAAAGACAGGTCTCATCTCCCGCA…	2.514e-22	Q20930	RecName: Full=Metalloprotease mig-17; AltName: Full=Abnormal cell migration protein 17; Flags: Precursor
LYa_b1_contig_335748 (56..594) consensus	-44.2001	0	CTATCCAGAAGCCGTTGTTGTAACGGGAGTGTTTCCTCCTTGTAATTGAATAACAAACAGTAAAGTCATCACTTCTGTGAAATACTTCGTGAATTCTGACTGATTTACATTGTTGCTATGATCAGTATCCATTCTTTGATAAAACAGATCAAGGTCATGATGAGTTATAGTGTCATCTCTGTTGACATCAAATGTAAGAAACAGACCCTGTGCTATGGTATTCATCTCTGGTTGATTGTGAGCAAATCTTCCAATGAATTCTGCTTTCGTAATTACACTATCGTTGTCATGATCGTAGTCAGTGAAAATTACATCCATATCTGAGGCAGTAAATTTCCCATCTTTATTTGTGTCAGCACTTTGCCACAAAACAGCAACTTCCTGTTTCACAATTTGTTG…	0.615379	O95267	RecName: Full=RAS guanyl-releasing protein 1; AltName: Full=Calcium and DAG-regulated guanine nucleotide exchange factor II; Short=CalDAG-GEFII; AltName: Full=Ras guanyl-releasing protein
LYa_b1_contig_399727 (1..714) consensus	-43.7029	0	GGAAGAGGTAGGAATCATGACGAACGTTAACCTTCGGCCATCTCAAATTTATTTTCCACAAGATTCGATTGCAAGCTCATTTTCTAAAGGTGGGACTTATGAAGGTAAAAATATCGGAATTGTGTTAGACGACATTGTTGACAATAGAATATCCATGAAAAACTTCATCGAAGGAATTACTGTTAGTAGAACAAATCTATATATCGAGGAGAAAAACCAATACGAAATCCGATGGGCTACACAGAATAATCGGTCTTTATGGGTTGCAAAAGAGCTGGAGCTGATTCGTTTTTTTCCAGATCCATTAAATTTCAAAATCGGGGGTCAAATTCCTAATCAGATGAATACAACGCGGAATGGCGGGGAGACGATTTTCGTTCGAAACCATCGCCTCATAGA…	1.4183	Q9PLZ2	RecName: Full=DNA topoisomerase 1; AltName: Full=DNA topoisomerase I; AltName: Full=Omega-protein; AltName: Full=Relaxing enzyme; AltName: Full=Swivelase; AltName: Full=Untwisting enzyme
LYa_b1_contig_35196 (967..1842) consensus	-42.658	0	AATGTTACGATAGTAGGTTGTTTGATTAATGAAGGTAATATTGAACCACAAAAATTATTCTGCGAAGAAAAGCCGGAATGGAGTAATGGTGCAAAATTTCTGTACAAATTGAGTTCAACCCTTTCATCACAGTTACTACCCCGAACAATTCTAATAAAAAACGGATGGAACATCGAAACAACGAACAACGAAACAAAGTTATTCTTACAGATTAACCATCCCGACAACATTAGCAACGCATGTAAATTAGCAAAAAACGTGGTTTGCTGTCAGGACTCATTAACAGATCTTCTGGCGTCTGTCTCCATTGATATGATTATCAATCAGAGCGCATCCAGTTTTTCAGCGAAGAAGCAAAAAGGATCAACCTGTTATGCAAACGCAATTGCGGCAGTCTTT…	0.102384	Q5UQE9	RecName: Full=Uncharacterized peptidase C1-like protein L477
LYa_b1_contig_382149 (60..1032) consensus	-41.7219	0	TCATCATATATGTCATATAATCCAATAGAACTGGAAGCAGATCCAACAGCAAATGCCATTGGTTGACCTGATGGGGACATAGTCTCATCCATATACCCAACATCAGTAATCAAAGCATCACCAGCTTGGTTACTGCTGTATAAGTTGTTCCAAGTTTGACTGGTACCTCCTCTACGATGTACTGACTGGAATGACAAAGCTGTGCCCACAACATTGTACACATATATAAATCCAGATCGTGATGCTGTTACCATTACTGGGGCGCCATTAAATGAACCGATATCAAGAGCAGTTGGTTCAACACCATAGTCATCTGATCTTAGATCCATTTCTCCGGATGGGGACAAGTTTACATTATTAGTCTCCCCATTGAAGGTAATTGGATATTTGTTCATAGCT…	1.213e-21	P08472	RecName: Full=Mesenchyme-specific cell surface glycoprotein; AltName: Full=MSP130; Flags: Precursor
LYa_b1_contig_49043 (1114..1996) consensus	-41.5694	0	ACAATACTTCTTTTATATGTGTGAATAATGTGGTTTGGACACTTGTCCATTCAATTAAGAATATATACATGATATAAATGTATTCCGATTTTTATTGTTTGTATTTTTGTTTTTCCATTCAATTACTTGTCCATCTTCTGGCGTTCTGCTTAAACTACTTCAAACCAAGGGGAACCTTTGTTATAGAGATACGTCACACAGGTCCTCTACTAACCTGTCACCCTATATGGAATTTTTTGGGGATTAATTTTTTTAAGGTAAGTTCCTTCTTTTAAAAGTTGATATACAAACAATGTCGCATTGCTTCACACAAATGTTGTATTTTGACAAGTATGTATACGCATCGTCGTACTATTTTTGGCCTTTTTACTTTGTTACGAGTATTACTAATGGGTCTAT…	4.27947	C8VBH4	RecName: Full=Histone acetyltransferase esa1
LYa_b1_contig_368801 (1..1176) consensus	-39.6419	0	CATTATCGTATGTATTTGTCTTCGTTGAAAATTCTGAATATTTGTAGAACTAGGTGTAGAACTTCTGCTGAATTCATTGTCTGCTAAAATCAACGCTTCTCTCGCTGATCCATTTGATGGTACATCATCTCTTCTAATCGCATTGCGCATCCCGGCAATAACACTATTCACTTCTCTGTACAACACAAATTCATTTCGAAATGCAGAATCTTTAACACTCACATTAAGCTTTAAAACTGGCGATAGGTTTTCATTTAGATAGTCAAAGTCACTTTTCTTCTCATCATCTTCAACTAAATAGTCAGATTCTGCCAATACTACTGTATAAATTTGGCCCTGTTTAAATGGAATTGATGCAGCTAGGAAAAACTCATGTAAGAATGATTGTACTGTTTGAAG…	0.102101	Q86Y13	RecName: Full=E3 ubiquitin-protein ligase DZIP3; AltName: Full=DAZ-interacting protein 3; AltName: Full=RING-type E3 ubiquitin transferase DZIP3; AltName: Full=RNA-binding ubiquitin ligase of 138 kDa; Short=hRUL138
LYa_b1_contig_168289 (1..384) consensus	-39.192	0	ATCGCTGGTATTGATTTTTCTCCAAATGTTTTACCGCTCACTGATGGTACTCTGTTTTTGTCAAATTGACTTCCTTCTACATGTCTGTTTGAAGCTGAAGCAATTTTAGTGTTTGACGCTGATGAAATCGACTTCTCATGTAGTGAATTGCCCGATCTAGATTGGAAAGCCCTACCTGATGCTAGAGTAGGAGCCAACTTGGCGAAATTAACAGTTTCCCGATGACTAGCAAGGTTGACTTTTCTAACTGCTTGTCTTTTTTTATGTACTGTTTTTCGTCCTCTGCGTTGCTGACGGGGGTGAAATTGTGATCCTTTATTCTGTTCTGCGATTAATACCCTCAAGCCATAAAACCTGGGTAGTTTATTGTTAAACATATTGTTC	4.09848	B2BNE1	RecName: Full=Major inner capsid protein VP3; AltName: Full=ATP-dependent DNA helicase VP3
LYa_b1_contig_94782 (1..1864) consensus	-37.9603	0	TTTTTTCGTCATATATACTTGTATATGGTTACATTATCACACAATTAACAACACATCATTACACATTTTTCTAGTCATTGGTGTTGACTCTGTATTAAAAAACAACACTATTCCCGCTGTATTTTATATCTCTCCTGAAAATTTCCAAATCTAAGACTGGAAGGAAGCTGATGTGCAAATGGCTTGCAAATAGCGATGCGATCACCTGTTTTTATGTTGGTCAATTTTCCTTCCTTTCGGCGTTTTTCTCGATAGGTATTGTCAACATCAAAATGGTGACGTTTTAGCAAATTTTCGATTTCGGAAGCGTTTATTTCTTTTGGTAGACTTTTAAATCTAATAGTTGTCATCACTGAAGTATAAAATCTGTATTGGTCAATATCAATTTGTTCGGGTAAA…	0.315431	P16703	RecName: Full=Cysteine synthase B; Short=CSase B; AltName: Full=O-acetylserine (thiol)-lyase B; Short=OAS-TL B; AltName: Full=O-acetylserine sulfhydrylase B
LYa_b1_contig_352537 (1..201) consensus	-37.5182	0	ATTCCCAAGTATCATCAACAAACAGTACACCTTCCATCTTTTTTCGAATACTGTCGTTGATACCTTCGTAAGCTTCGCTCATATGGTCTAAAAACTTTATTATGTTTTCCGCAGGAATTTTCGTAGCCTTCATTACTTCACATTTTTCGTCCCATTTATCAAACAATTCGCCTTGTAATTCACGTTCCAATTTATCCGCCT	0.305867	B3CTD7	RecName: Full=DNA repair protein RecO; AltName: Full=Recombination protein O
LYa_b1_contig_284812 (201..3192) consensus	-35.7441	0	GTTGAACTGTTGTTGTTGCTTGTTCATTTGATGTATCTTGAACAGAAGTTATCGTTTGTTCATTTGATGTAGGCTGAACAGTAGTTGTCGTTTGTTCATTTGTTGTAGGCTGAATAGTAGTTGTCGCTTGTTCATTTGTTGTAGGTTGAACTGTTGTTGTTGCTTGTTCATTTGATGTATGTTGAACAGAAGTTGTCGTTTTTTCATTTGTTGTAGGCTGAACAGTAGTTGTCGTTTGTTCATTTGTTGTAGGTTGAACTGTAGTTGTCTTTGGCTGAACTGTAGATGTATTTTTTTCAGTTGTGATAGGTTGAATTATATTTGTCGTTTCTTCAGTTGTTGCAGTGCTTGTTTCTTCAATTGTAGGACTTACTGTAGCTGGTTCTTCAGCTGTTGAAG…	0.123602	Q9UKP4	RecName: Full=A disintegrin and metalloproteinase with thrombospondin motifs 7; Short=ADAM-TS 7; Short=ADAM-TS7; Short=ADAMTS-7; AltName: Full=COMPase; Flags: Precursor
LYa_b1_contig_28698 (420..1448) consensus	-35.5866	0	ATATATAAAAGGGAAAATTCATTTTACAAATAAGAGTTCTGTAAACATATTCCTGGAATGGTAGAATATGAACCCGCAATTTTCTATCCTCGAGTTGTTTGTCTAATAAGTTCTAACCATTTTACTCTTTATGTCTATCATTTAAGTTTGATTTTATATCATATTAAATTTATTTACCAACTCATCAATGACAACTTTATAAATACAGTCATCATTCGTGTTTGGCAATGTTGACAATATTACCAATATATCCTTAATTTTTACAACATCAAGATGTGTGCACAAATTCAAATCACGGAATTTTCCACCGAAGTGCATTTATAGTATTATCCTTGGTGAGTCCTTAATGTAGATATTAGGGTTTACGGCATTAACTGCACCATCTCGTTTTCTCGCTTT…	0	not available	not available
LYa_b1_contig_285654 (650..1512) consensus	-35.3132	0	AGGTAAAGGAACGTCCGAGCTTTTTAAGTGTCTTGTCGGTTATGCTGAATTCAAGCCGCATTTATTTAAGGAAGTGAAGAGATTACAACAGGAAGAGCACATCATAATATTTGGTAAACAGGGATATGGGATCGATCTAGTACGTAAGGCTATACTTGGAAAAGATAATGAGAAGAAGGCTGAAACAAGCAATAATGGTCACACACATGGAACTACACGGACAGAAAATACACCCTCTTCAAAAAATCTAGAGTTCCACGGTTCAAAAGACAAATACGGAAGACATGTAAAATTAACATTTTTGGACGCAAACGACAAGGAATCGTTATCGTCACTAACGATTTCAGAAGAATACTCTGTATTGTTTTGTATTCCTGTTTCATTCCGCTTTACAACTGA…	0.764855	Q9NUV9	RecName: Full=GTPase IMAP family member 4; AltName: Full=Immunity-associated nucleotide 1 protein; Short=IAN-1; Short=hIAN1; AltName: Full=Immunity-associated protein 4
LYa_b1_contig_207618 (12..640) consensus	-35.1272	0	TTTTTTTTTCAGTTTTTGTTAAATATTTTATCCAAACATATCAACTAGTAATGTTCATTCACCGTCGCTGTCAACGAATAAACGTTTAATCATCAATCTTGTTATCGAAAAGACAGGGAGTAGTTTTGATTAAATGTGATGGAATTCGTTGTTTTGCAATTAGAAAAAAACACACAGCTTATTATTATCCGAAAATGGAGAGAAAAAAATCAAACTATTTGTGTATATGTTTTGATGATTACACTGTTTATTCATTGAAGGAAGTGCTTTCGACTATGTCTTTTTCTTGCTCTTGTTGTCATGGATACACAAATGCCGCTATGATGGCGGCAGCCCCCAAAGTGACTGACGCACCAGCTGTCCATGCATGAGGATCTTTATAAAGCGGATCATTAGTCT…	0.0332342	C0M899	RecName: Full=Protein SprT-like
LYa_b1_contig_95684 (222..1106) consensus	-35.0512	0	AATAAATTTAATGTATTGAATTTTATTGTAATTTTTCAATTTTATTACCATGGGTTTTTTCTGTACCCAATAAATTCGAGATGTACATGCTTAAAAGGTAAGGGGTGGATGCCATGAAAATACTTTCAAATTGCAGGGGCAGATCCAGCCATTTTTAAAAAGGGGGTCCCAACCCAGGAAAGGGGGGTAACTATGATGTCCCCATTCAAATGCATTGATCGGCCAAAAAAAAGGGGGGTTCCAAACCCCGGACCCCCTCCCCTTTGCCCCCTGGATCCGCCAATAAATTGATGCAGTAAATAATGATTGAAAATGGAACAGCCGCTGAATTAATGTTGTCAGGGAAAAAAAAATAATATTTTTTCTATTAATACTAGTGCAAAAGTTCATTTTATTTTT…	0	not available	not available
LYa_b1_contig_99211 (293..2855) consensus	-34.5751	0	TAGACAATATAAATCATGTTGACACGATATCGTGTTAACATCCTTTACTTCGCGATTTATCGATGATAATAATATCTTTATAACATTGTGTACACCGCAATGTTAACGATGTCAACGATGTAAACAATATGTAGGAATTTAGACAATGAAAGCGATGTTGACACGATATTGTGTTAACATTGTTGACATCGCGATGTGAACGATGTCAATGATGTAAACAATGTATAAGAGTTCAGACAATGTAAACGATGCTGACACAATATCGTGTTTCCATTGTGAATATAGCGATATACACGATGTTAACACGATATCTTTCCAATTTGTATACGCCACGATGTAAGAGTTCATACATTATAAACGATGTTATCTAATTGACATTGTAAATATCGCGATGTCGAC…	5.408e-13	O43916	RecName: Full=Carbohydrate sulfotransferase 1; AltName: Full=Galactose/N-acetylglucosamine/N-acetylglucosamine 6-O-sulfotransferase 1; Short=GST-1; AltName: Full=Keratan sulfate Gal-6 sulfotransferase; Short=KS6ST; Short=KSGal6ST; Short=KSST
LYa_b1_contig_269918 (1..538) consensus	-33.739	0	TCGTTTGTGATGGCAATGACATACTCCATTATGGTCGCAGTGTCCTGATATTCCATTTGCACACGTGCAAGTTCCGCCATCTGTACATGTATCTTGTCGTTTGTGATGACAATGACATACTCCAGCATGGTCACAGTGTCCTGGTGTTCCATTTGCACACGTGCAAGACCCACCATCCGAGCATGTTGTCTGTCGTTTGTGATGGCAATGACACACTCCATTATGGTCACAGTGTCCTGATGTTCCATTTGCACAAGAGCAAGTTCCACCATCAGTACATGTATCTTGACGTTTGTGATGACAATGACATACTCCGTTATGGTCGCAGTGTCCCGGTGTTCCATTTGCACAAGTGCAAGTTCCGCCATCAGTACATGTATCTTGTCGTTTGTGATGGCA…	8.392e-07	Q8I335	RecName: Full=Translation factor GUF1 homolog, mitochondrial; AltName: Full=Elongation factor 4 homolog; Short=EF-4; AltName: Full=GTPase GUF1 homolog; AltName: Full=Ribosomal back-translocase; Flags: Precursor
LYa_b1_contig_168402 (1..421) consensus	-33.5243	0	AACATTGATGATGCATTATTCACTTGCAGCAAGGGAATAATTCGACCTCATTGAATCCGTATTCATGTGACCTTTAATTCAACCCCTAATCTAGAGATTGATTACGCATAAATTATGAGTGTTCAGTTATTAAAAGGAAAAAAAATGCCAACATTGCAAGTGAAACAAAGGTAAATCATTTGATTGACTGATTTGATCAACAAAACCTCATTTTTATACAGGTACAAATAATGATTTACATATATTGTTAACCTATAATATGAAATTAAACAATCGTAGAAAAAGCCAATGGCACGAAAATACAAACAAAACGATTATACATATTATTGAGCCCATGCTTTGTTAATTGTTTATTTTAGACTTCTTACAATTTGGATATACGTTTAAGTATGTTATAAA…	0	not available	not available
LYa_b1_contig_349962 (1..748) consensus	-33.4013	0	ACTAGTAACAGAGAGTTTTAATCTAGCACCAGTACCAACTGTACCAGATGATGCACACTCGTAAATCCCTGCATCTTCCTTCTGGACATCAGTTATACACAGATCACCTTTTTCTGTGATTTTAAATTTGGATTCTGAATCTTGTGTTATCCCTTTTGTGACTTCATGTTTATTTCTAAACCAAGTGATTTTATCTTTGTCGAAATCAGAAGGGAGTGGACACGGTAATGTTACTAATTTGTCTCCCACATTTGCTTTTATTATTCTTTTGCCTCGATAGACAGCACAAAACAATATTAGGAAAAAAATCCCTATTCCGCCAAAACTGAGCAACCCGATCAAAAGTAAATCTTCCTCTGTATCTAAAGGACGCCAGAACACACCAAGTAAAATGAAGGA…	0.002704	Q92626	RecName: Full=Peroxidasin homolog; AltName: Full=Melanoma-associated antigen MG50; AltName: Full=Vascular peroxidase 1; AltName: Full=p53-responsive gene 2 protein; Flags: Precursor
LYa_b1_contig_15402 (1..599) consensus	-32.0698	0	ATATTATATTTTAATATCCAATTTACAGTTTTTAGTAACAATTTAAACAATCATTGTACATACATATGATAAACAAACAAATAAAAAAAAAAGTAATGTAAGAAGATATTTACAATCATCGTCAATACGAATAAAGGGTTAATCTCCTTTCTCTTCCGGGTAAAGTATACAGTCCATATTGCGACATGCTTTAGAAGTATGCATTAATATGGGGTATATGTTGGTCGGATATAATTGTCAGATCTAGTAAAAGATCGTTTAATGTTTAAGAAATAATGTCATGAATAAAACTATAAAGGACTTGTCTAGCTATATTAATTTTTTTTCTTTCTATGCCATAATATAGTTCTTGCTATCAATAATAAGCAAAATATGATAGAAAAAATTGTGATTCAATGT…	0	not available	not available
LYa_b1_contig_351857 (93..2153) consensus	-31.4195	0	GTTGAATTTATTACGAAGATGATTATCCAGTTATTGTACTAAAATTCTTTACCTCGAAATTTCATTTTTTCATGCAAATATAAATGTTCGTATACTTGTATTCTTTAGAAGATGTATGTTTTCGCAGCCTTACGTGCACTCTTTGGTGATCCAAAATTATCCATTACATTAAAAGAGCTTGTTACTCGTGCTGTGCAGTAGGTTATACGCAGTATCCAAGTGGTTAAAATGAACACTCTTATCATACTTCTTGACATAAAGCTAATTGATAATTTATTGTTCAGATACCGTAACAAATAGTTTGACATATTCGTTTTTGTTACCATTTTGTAGAGCATTTCCTCAACATCATTTCCCCCCGCGCGGACATTATTGTCAGCCCTTTTATTTGGCAAAGAT…	0.0486244	Q56R14	RecName: Full=E3 ubiquitin-protein ligase TRIM33; AltName: Full=Ectodermin; AltName: Full=RING-type E3 ubiquitin transferase TRIM33; AltName: Full=Transcription intermediary factor 1-gamma; Short=TIF1-gamma; AltName: Full=Tripartite motif-containing protein 33
LYa_b1_contig_105912 (1..460) consensus	-31.3757	0	TCATCATCGTAGCATCCAGTCCATTGTCCTGTAAGTTTTGTATTGATATGGTGCAAGGTCAATACAGGCCTCTTTTCCATTGTAAATGTGCCCACAGTTTTTCCGTTTTTTTCATAAGTTCCTACTATTTTACTACCTTCTGCAGATATTACTCCCCTAAAATCTTTACATCCTGCATGGCAGTCTTTGTTCTTTTTGTCAGTAGTCACGCAGAATATGAGATGACGCAGATCAACATTACAGTCATTAAGTCTGGTGTAAACAGTGTGTCCATTTACATCAGACCCTTCAAGTTCTGAAACCATTTTTTCTTGATCCAAGTGAAGAACAAAGTTGTTATCCTTGTCATCATTGTAGTGTCCTATCCATCTTCCAGATATATAAACTTCCCTGCCTACA…	3.59878	Q96SQ9	RecName: Full=Cytochrome P450 2S1; AltName: Full=CYPIIS1
LYa_b1_contig_59848 (557..1355) consensus	-29.1588	0	ATACGGTATATATAATGTCAAAGCTTAAATAGTATGAATATTTTGTCCCCTAGTTGGATATAATCAGCATACAATTAATAATATATATTTTTTTTGTTTTGTTCGAGTCACGATATTCCATCATTTCTCTATATGTTATTATGAAGATTCTTCAATTCCACCAATCCAGGAAAGTACCAGTATGTACCACTTGTATTTGTCGACATCAGAAATAACATATCGCCTGTTTCTTGTGTCATAGCTTCAAACATTTCTTCAAAAACCTGAATATTGTTAGCGTATGCAAGGAAGAATAATCCTGTCCGACCGCTTCCTTCAGTGTATGGAAGAGACTGTCTAACTATCTGCTGATTTCGCTCTTGGACTTTTCTCATAAGATTAACGTGAGATGTACGTTGC…	3.922e-24	P76536	RecName: Full=Probable deferrochelatase/peroxidase YfeX
LYa_b1_contig_411194 (63..415) consensus	-29.1217	0	TAAAAGATGACTGGAAGCATAAAATATTCATTTTCTTACAAAACTCAAATTTTTATTTTAGCAACCACAAGAAGACGCAATGAGGTATACGGAGTTGATGGTGTTCATTCTAATTATAATTACAGATATTGTATGTTCTCAACAATCATGTGTATGCATACAGGTTTTTGATCCAGTGTGTTCTATATTCGGTGAGACGTTCAGTAATGAGTGTACTTTGAATTGTGCTGGTCAAATACTTGCGTGCCGTAGGGAATGTCCATGTTAGTTTTAACAACAAAAAGACAAGGCATGTCCAGCTCCAAATGATACTGAAACATATATGAAAGAAATTAAAAAAATAAAAATAAAAA	7.729e-05	P86987	RecName: Full=Insoluble matrix shell protein 6; Short=IMSP6; Flags: Precursor [Ruditapes philippinarum]
LYa_b1_contig_152648 (11..1724) consensus	-29.1178	0	ATATTATCACCTTTAGAAGCTTGAATATTATTTGACCATTGGAGTACTAAGGGAATATCTTTGACATTAAGTTGTAGTTGTGTATCGCTGGTAGCCGATACAGACCCGTACGATGTTTCACAGGTGTAATTTCCAGCAAGATACCTGGTTACCTTTGGGATCGTCAAATGTGGATTGTTCACTGTACTTCCGCTGTATTCCAAGCTGCCCGTTGTAGTTATCTCCTCATCGTTTCTCCGCCATGTTACGCGATTTCCACCAGAGGCATAACATGGTAGAATAACACTATCATTTGCTTTTGGGCTTAATTGTAATGGCGGATAAACTTGTACAAAAAGAACTTTCAATACAACGGTATCCTCCGAATGTCCAAACGTGCTTTCAAGTTTGCATGTGTAA…	7.15e-25	D3YXG0	RecName: Full=Hemicentin-1; AltName: Full=Fibulin-6; Short=FIBL-6; Flags: Precursor
LYa_b1_contig_12378 (1..600) consensus	-29.1057	0	TTTCGTCTCTCTGTTTTGCATTTTCTGACAACTGCTTACAAAATGCTTGTTTGGACTGATCAAGTCTATTTTCTAATGTTCTGACAGTTTTCTGCATCTGTACAGTGTGTTGAGAACTCATGTGAACACCTCCCATATTCTTATGTTGATCTTTTATCTTTTTCTCCCATTTTCTGATTTCAGCATCTAACTCTATATGCATTTTCTTTTCTTCATCGATATCAGTTTCATTCTCATCTTTAACCTCAGCTAATGTGACGAGAGTATCTGTATTAACATCATCTTTATCCTGGTTACTCCTACTTTCAGCAAGACGTAACTCCTTCAGTAATTCTTGTTTTTCTGATTCTAGTTGACCAATTGAGGCTTTTTGTTTTCTTATTAGATTCTGTGATTCTT…	4.335e-07	B1H228	RecName: Full=Coiled-coil domain-containing protein 114
LYa_b1_contig_269115 (66..2573) consensus	-28.1566	0	CAACCTTTCAGATCGTCACAACTGCAATTGCATTTACTTTTCCAAATACTGGTGGCCCTATTGGAAGCTCGTGTGTGCCATCTTTGTTAATTTTCATGACACCATCTTTGTTCCAATCTGAGAAATATATATATGTACCATCTACATCTATACCATAGAAATGTGCACCAGCGTCTTCAAACACGACCTTCCTTTGTGATCCGTCGGTGTTCATTGATTCTATTTTGTTTGTTCCAGCATCACAGAAAATGAGTTTTCCCGTTGAAGTATCGAGCACAATTCCATTTGGATATTTCAATGTTTCATTGGCAAGAACCATCCTGCCAGTACCGTCATAGTTCACTTTTTCAATCTTAGGACTAGAGCCCCAATCAGTCCAATAAATCACCTGGTTTTGTG…	1.531e-70	Q91VN0	RecName: Full=Low-density lipoprotein receptor-related protein 5; Short=LRP-5; AltName: Full=Low-density lipoprotein receptor-related protein 7; Short=LRP-7; AltName: Full=Lr3; Flags: Precursor
LYa_b1_contig_417139 (6..495) consensus	-27.5802	0	TTTTTTTTCAAATGAAAATTTATTATTACAAGCAAGCTCATCTAGTCTTTTTATAATATGAATATACAAAAAATAAATCAAAATTACATTAAAAGTTCAAAGAAGTCCCTGCTGTTTTCTCTCTTATTTCCCTGATACACAAAAGTTCATTAAATTCCATCATTGGTACGAAGTTGACAACGCGATCCCTAATTACTGATGTATTAATTCTCATACGTTTAGTCCCTGTATTAGTCTTGCCGACAATAACCAATAATTTATTAAACAATTCTGAATATTCAATTGCTTTTGGTTGTAATTAAGTCTATATTCTTTTATACTTGATTCATACTTAACAGTAGCGTGTAAAATTTTAGGCGTTTATGTAGTCTATATTCTACTCTATTTGCTATACATATG…	1.22136	Q97C14	RecName: Full=Probable glycine cleavage system H protein
LYa_b1_contig_350463 (76..4329) consensus	-27.3887	0	TCCAAATAAATTTGACTAAATAGTGTAGTACAATTAACAGATTCCAAACAGACAATGTCAATAATGATTGTACTGGAACAGTTTACTCGTTTGTATATTCTATTTCGCTAAACGAAATTCGAACTTTTAAAGTTGTTCTATCCGTGTCTGACTTGCACGTAGGTCATTTATAGTAAATAACTATGATACTTTAAATGTACTATCTTAATATGATTTAAGTAATACGCCACAATGTAGCCTTTTTACCCCTATCATGTTTATAAGCATCGAATTTGTTGTTGCTAACTAAAGTTTCAATTATTTTTGTAATATCATCGTGCGGTTCCGATCTCTTTGCCCAGATTAGAGCGGTTGAACCTTCGATTTTGTCCTTTGCATCAATATTTGCTTTATTTTGTA…	3.152e-28	Q5UPF8	RecName: Full=Putative ankyrin repeat protein L88
LYa_b1_contig_7576 (1..2006) consensus	-27.1273	0	TTCTAATGGAGCGAAACCGTTACGTGATAGTCAATTCAACGGAAGTTCTTACGTCAATCCGGTAAATGAATTCGACGAGAATCATATCTACAGAATCAATCCTGCCGAATCGATATGTAAAAATTCCGATTGTGATGCCTTGCAAATTATATTTATTGTAAAATCATATGTTTTAAACTTTGGTCAAAGAATAGCTATACGCCAGACATGGGGAGGCATGACAACTCTTCGATCAAGAACTGTATTTATTGTTGGATACCTTGACGGCATTGATCATTTGGTTCAACTGGAGTCACGAATTTATAAAGATATTGTACAACTTAACCTACCAGATCAGTATGGAAATATAGTCTATAAAACTATATATTCATTATTATGGTTATTCCACCACAATATAGA…	3.222e-22	Q24157	RecName: Full=Beta-1,3-galactosyltransferase brn; AltName: Full=Brainiac protein; AltName: Full=Neurogenic secreted-signaling protein brn
LYa_b1_contig_20039 (911..1411) consensus	-26.9942	0	CTGGTATTTTATGCACAGCTGATGTGAACTCTTCTTTTGAAATTACATCGTCATTATTTCTATCCATGGCGTCGAACAACTGGTTTGCTACTGTTTGTGGATTTATTTCGTTCGCAGAGGACCCAAATAGGTCGTTGTAAGCCCGTAGAAGATCTCTGACTTCAACTCGGTCTATAGATCCACTTTTATCCGAATCGAATAATGAAAATGCAATGTTGATTTTATCTTCGACCTTATCACTGTCCATCATACAAATTCCTATCACAAATTCAGTAAAATCTACAGTTCCACTGCCGTCTGTATCAAAGCAGTCAAACATTTTATCTGCAAACTTAGTGGCGTTCCCAGGAAAACGTCCACTATAGACACGTCGAAATTCCTTTTTAGATAATTCACTTT…	4.045e-25	Q6DCM9	RecName: Full=Hippocalcin-like protein 1
LYa_b1_contig_132745 (274..1408) consensus	-26.9748	0	CACAAATACCGAAATCACATTTTGATTCCATAACTTGACAGTCTCACTCGATTAAATTTAATGTACAAAAAATGCTAACATAATCGCTGATACATTTTATGTGTAGATTCGCATGGTTCCATGTCTGAATTTTTATTAAAATTCAAATAATCACAACATAATCATTCCGACAACTAAGCAAATATACAGACAAAGTACACAAACAAATAACTCCTCTGCTTTAGCCATACTCTATGTACTTTCAAAGATTTTCCACAAACTATAAAGCTGTAGTTATGTGACAGACAGATGAAACATTGTCTACTTATCGGCAAAACATGTCCCAGATATCAGCACGGCAATTTGCCTCCTCGATGTTCTCTCTTTAACATGGTTGTTTTTCATGGCATCATTAATATG…	3.3614	O18477	RecName: Full=Translationally-controlled tumor protein homolog; Short=TCTP
LYa_b1_contig_349595 (1..725) consensus	-26.9331	0	TGGTCCACTGTTCGATTTGTTTGTAGTTTCCATCAAACAATGTGATGGTTTTGGTTTTATTTTCACATTTAAGATAAAACGCTTGGTATTGGATAGCGTTTCCATGATTTGAATCGTTTGAATCATTCATGTTGTCAATAAAACATAAAGGTAATACTTTTTTAAGCTGACGTATTTTAGGTTTAGAACCATCGTGATGTTCTTCCATATTCTCGATTATATATAGAGTAATGGATGCATAAATGGCTTTGACTTTGAAGTAAATACAGATGTTGTTGTCCTTTTTTGGTTTCATACCATGAGCTGACAGTTTTATACTCTCCTTCTTTTTCTTGAATTTTATATGTATGAAATCTTTGTCGCCAAAAAAACCCAGTATTAACATATATATCAAAACGC…	0	not available	not available
LYa_b1_contig_51746 (263..2939) consensus	-26.8746	0	GCCATTTTAATTTTTGATTAGTATTTGATTCAGTATAATTGTATTTTGAAATATTCAGCAGCCCATTGGACACATTCTGTTCTGCGGATATACCAGTTATTATCTATGCTAGAAGCACCGTCTATATCTGGGAGATTTCTGCGTGAACTATGTGCAGTCATCGGTACAAATAGCGGTTTCAAATGTGTTTCTTTGAAAATTAAAGCATTCATTGATATATCTTCGCAAAACCGTTTATCATTCCAATCTACCAATGCTTTATCTTGCATATATTTTTGTAGATACTTGCGGTGAAAAAGCATTGTTTTACCTATAACCAAGGATGGTTCTTTACCTTTGACTAAATATTCATTTTTTGAATTAACAAAGCGCATGTCACTGCTAATACCAACTAGTCTA…	4.059e-07	O01705	RecName: Full=Exostosin-2 homolog; AltName: Full=Glucuronyl-galactosyl-proteoglycan 4-alpha-N- acetylglucosaminyltransferase; Short=GlcNAc transferase I; Short=GlcNAcT-I; AltName: Full=Glucuronyl-galactosyl-proteoglycan/Glucuronosyl-N-acetylglucosaminyl-proteoglycan 4-alpha-N-acetylglucosaminyltransferase; Short=GlcAT-II; Short=GlcNAc transferase II; Short=GlcNAcT-II; Short=Glucuronyl transferase…
LYa_b1_contig_349712 (57..441) consensus	-26.5899	0	AAAATTATCAATTTTATAAAAATCATTAAAGCGTGGTCTTAAATAAAATCCAAGTTTACATATTTAGTGTAGCATCTGTGTGTGTCTGAATTTTCTTCAATTTGCAGCTATTTTTTGGGTACTAAAGTGATTTTAACGTAGGGATTTTTGGAGAAGTCTGATCCCTTCATGGTAAACGCCACATTGTTATAATCAGCGTTGTCATATTTGTAGAAATTTCCATCCCCTCCTTTAAAACTTGCCATATGAAGTCCGTCTTTATCTTGAGTCACAGTAGGATTTTCACCTCTCCATTTGTTTTCGCCAATTTCTAATGACAGTTCAGTTCCTGCCATGGTTGCCGTAGGCTTCAGTGGGTGTGTCATTTTGATAAACTCTTGATTCA	0.138434	B4USZ0	RecName: Full=Cadherin-2; AltName: Full=Neural cadherin; Short=N-cadherin; AltName: CD_antigen=CD325; Flags: Precursor
LYa_b1_contig_110329 (1..2225) consensus	-26.2608	0	AGCCACATGTAAAACTATATTTTCGAAGGTAAATAGAAAACGGCCGGTAACAAAAAGCATATTGCACGGGTTTTTTTTTAGAATATCAAAAATCCATATACTTCGTAAATTGTACGGACGCCACCACGAGTTGGTTGACCGTTATGGAATATCCGTTTCATAGATGGTATCGATTATGTTCATTACGTCGTAACTAAAATTTTGTTCCCTTTTCACAAATGTGACTACCGAATTCGACTATTTACCGGGTTTGTTATAACATGATCAATACGACGGATGCCATATGTGGAGCAGTATGCTTACACGTCCGGAGAACCTGAGATAACCCCCAGTGTTTGGTGGGGTTCGTGTTGCTTAGTCTTTAGTTATCTATGCTGTGTTTAATGTACTTATATTTGC…	0.164631	Q3V6T2	RecName: Full=Girdin; AltName: Full=Akt phosphorylation enhancer; Short=APE; AltName: Full=Coiled-coil domain-containing protein 88A; AltName: Full=G alpha-interacting vesicle-associated protein; Short=GIV; AltName: Full=Girders of actin filament; AltName: Full=Hook-related protein 1; Short=HkRP1
LYa_b1_contig_1236 (499..718) consensus	-26.1405	0	AGGCTGGGCGCTGAAGGTTAACAAATTGTGCATGGAGGACGTATGTGAGGAATGCGGATGGTGCGAAGAGGAGCGTAAAAGATCCTTCCCATCAGTCAAAAAATCTCCTGCTAAACAAATCTCAAGCCTTAGTCTCTCCGCCAAGAAACGCTTCTTGTCACATTTGAACTTTTAAATATACATCGAGCAGACCATTTAAAGGACATTTCATGAACTGAAC	1.28575	Q9YIC2	RecName: Full=Congerin-2; AltName: Full=Beta-galactoside-binding lectin 2; AltName: Full=Congerin II
LYa_b1_contig_303413 (89..2394) consensus	-26.0616	0	ATCAAATGTATTGCATATTACGCATTGTTAGATGCATGCAGATGCATGAAACTTGCTTACTATCATCATTTTCTTAAATGCATATGAATCTTTTCCACAGTGAAATATCCAACTAAAGCCTTAACGAGAATTGTAACGACTATATTGTCACAGATCAGATATATCGTCATGTAGTTCACTAAAGGAGCTTCTTTTTTTTCTCATTCTTATATTTTCTTAACAATGCATCGTCCAATTTTGTATCTGCATCATTATAGTAAACAAACTCATAGTGTTCTGTTTTCTCTGGCAGCAATATCTTCATTATTTTATCTACCGTTGTGTAAAATGTTTCCACCTCCGACTTCATTTGATTTTTATCCAGTAGTCCATACTTTTCCATTTGGCGTATCACTTCTA…	0.0002426	A8E5V9	RecName: Full=Stimulator of interferon genes protein; Short=STING; AltName: Full=Transmembrane protein 173
LYa_b1_contig_36518 (107..1557) consensus	-25.9938	0	ATTCTAACAGAAAAATTATTTTCATCAAAGTCTTTCAGTGTAAGTTGCGCACAACCAAAAGACGAATGTCAGTTATGAATTCTAACCTTCAAAAAGAATAGATTTGAAGGCCGCGGGAACATTTCTTACGCATACATGTATTTGAAATTTCACCAACATATGAATCAGAATGATAATTAATTCATTGCATGAAATTGAACAGAAAAATAAGATTTTAAGCTAAGCAAAGTTCTAACCAGTGTTAATAATAAAATGTACTAGGACGCGTAAATGTAGTAATATTATATAGTTCATGTTGTAATTGGTGCCATATTCATTTTTGCTTGAATTCTGTAACAAAGCCATAGTATTGCACTCCGTGGAAAGTACCTTTTTCTGACCATTTTTTCTCTCCTTGGT…	3.865e-25	P46058	RecName: Full=Epidermal differentiation-specific protein
LYa_b1_contig_34160 (358..1573) consensus	-25.9496	0	CAGATACCATATACTTTGAGATCTAAGTACAGCAGGAAAGTATTTCTATTCGACGTATTAATTTTGATATTTCATATGTAACTGAAAACTGTCAATCTATGTGTTTGTCAAGAATATGTTTTAACAATTAAAACTTTGAGCCATGTTGCAACTGTTCATTAAAAAGCTTGTCCAATCATATCGACTATAATTTAAATATCACTACAATGTAAACATGTCAAAATGTTATATGTAACAATGCTGTTAGCACATGACTTTACTTCTGGAATGTACCATTAAGATTTATAAAATGCCGAACTTCAAATCATATACAACATATATTGTATTGGACGAACAAACGTCAAATTTCCGCCAAAAATTGAAAGGCTAAGAATATAAATAAGCAGTGCAATATTTGAC…	0	not available	not available
LYa_b1_contig_18575 (1..1199) consensus	-25.4401	0	TCTTCTAGTATTTGAATGGCTGGTGGATCCGTAAATCCCAGTTCCTCAAAATCACCAAGTTTCTGTGTTACCTTCTCACTCAGTAGTTTCGTAATTGCCATTAACTTGAGAAGTTCTTCTTTTGTAGCAATAGTTTGCAAAATGGTTTCCATCGACACTTCACCCTTTTCCTTAGGAGGAACTCCATGCATAATAAATGGGTAATTGAATGGATCTCCATACTCGTCATATTGTTGGTAGTTGGCTGCAGCATGTCCAACGCTACATGTATACATGATTGGTGTCAATGTCATAACTAGCTGGTCAGTTGTTTCAAATCTCCCTCCATTTTGTACTCCCTTAATTCCAGCACCACCATCATCAACTGACTTAACAATTTCTGCACCCCAAGCCTGTATT…	8.727e-66	O75342	RecName: Full=Arachidonate 12-lipoxygenase, 12R-type; Short=12R-LOX; Short=12R-lipoxygenase; AltName: Full=Epidermis-type lipoxygenase 12
LYa_b1_contig_188661 (426..1928) consensus	-25.2799	0	AAAAATTTGCTGATGAAACTAGATTCTTCGACAGGTCGTCCGAGTGACAAAAACCGTGGGCAGACAGAAGAGCTAACGCTAATAACAGCTTATTTCAACATCGGAGCGTTCCAAAAAACCCCAAATGTTATGTTTTCTTCCACAACATATTATCTTTGGATGAAAAAATTTGAATTTGTGAACAATAGTGTGATCCTTTTTACGGACGAAAATGATTTCGCAATGAAGTTTAAATCAAACCGTAAACATTTCCCAACATATATGACACAGATAATTTTTGTGAATCAAACAAATCTTTGGGCTTTTCAATTAAAACAAAGAATAGAAGAAATATATAATCAAAAAGGATACAAAAAATACTATCCAGATGTAGTTATACCTGCATACACATGTGCCATG…	7.701e-06	P25666	RecName: Full=Protein HtrL
LYa_b1_contig_58633 (1..1013) consensus	-25.2234	0	ATTGGAGGTTTGAAAATGTCATCTTTGTGCTCACATAATTCCCCAAGACCATCAATGGTAGCATTATGTTTTGACTTGATATAGTCGTAATTTGCACAGATTGTATTAGCCTTTGCATCTGTAATTATTGGCTTGATCCCGAAATGCAAAATCACAGCCATTAATAGGACTTGTATTGAGAACAGAATAAAAAATGTTGGAAAATTGACACATGGAGACGGTTTTGGTGGAAGTGGAACTGGCTTGGCACCTTCCTCTGATTCTTTACACTCCTCTTTGGGTTGATATGAGTAAATTGGACGTTCATCAGGATTGGCAACTGCTACAAATCTGCCAAAAACCTGAGTCATCAGTTCTAGGATAGCAACATCTATCTTCGGTATGAGCGAAAACCGATAT…	1.00704	Q1CW45	RecName: Full=CRISPR-associated endonuclease Cas6
LYa_b1_contig_357954 (1..212) consensus	-23.2119	0	TACAATATGAACAGCTGCCAAATGTGCTGTTTTGACATAATCCGCAAAATCTATACCCATAGCCACACATCCTGCATTTATTGCATCGTTTAAACATCGAGTTCGGTAGAAAGCTCGACAAAGATTGAGAAAGCACACCACAACTGCTTATCAATAGGAGGCATATAATAATAACCTTCATGTTTCTGCTAAACAATGTGCTCGAATATTTG	0.314811	B4G2G5	RecName: Full=Lateral signaling target protein 2 homolog
LYa_b1_contig_134296 (10..981) consensus	-22.9268	0	ATTTACACTATAACACGAATGCAAAGAACGAGTTGAATGGAACAATGGAAGAAACTCCATCGACGTCACAAGACAACCAGCCGGATGCTGCGACACAGGGTGGACATGATTCGGATTCAATTTTGAAATTGTTTAGACCAAAGGAGGATCGTCCGTCTACGTCACAAGGCAACACAAATAATGCGTCAAAAAAGTGTGGAAATAACACTGGTAAAAAAGTGGGAAAACAGAATTTGAGAAAAAATATCAAAGTAAAGGACTCAAAATGCATGAATCCTGAACAGATTCTTAAAATTGCTTTTGCAATTTTTCTTTTTATTATTGCTTTCACAAGTGGATTTATTGGACGAATTTTAAAGCATATAATCATTTGGCATGTCAACCCACCGATAATTTCCG…	1.963e-07	G5EBQ8	RecName: Full=Chitin synthase chs-2; AltName: Full=Chitin-UDP acetyl-glucosaminyl transferase chs-2
LYa_b1_contig_163785 (1..270) consensus	-22.9086	0	CTGTTTTCATTTCATATCAGTACCTAAGTACTCTGGTGGGATGTAATCCTCAAGATCCTTTCGTATTGTTCGCAGTCTCTCTGCACCTCTTCTCTTGTCTCCTGATCTAACACTAGGTGTTAGAGGTCTTCTGGTTGGATCATCTGTAAAGCTTCTGTCATTTTCTGATATCTTGTGTTGTGAGGCCAGTACTAGTTGCATTTCCTCTTTACTTACACCTGCTACGTCACCAGGTTTCTGATTAAAGTCCGATGGATGAGATGTTCTTCC	5.03439	P62286	RecName: Full=Abnormal spindle-like microcephaly-associated protein homolog
LYa_b1_contig_94254 (403..1851) consensus	-22.7208	0	GGTATGAAAAGCTCCGAAAAAAAAGCATGAAGGTCTATCTAGAAGCAGAATACAAGAAGAAGGTAGACACTGGTCTTTGTGTAATGGTTTGTTTTAGTAAAATTCTTGATCAACATAAAGCCCATCAGAAAATAACAAATTTTATTGAGTTTCTTTGGCATACACTGTATACTATTGAACATGTAGAGACTTTTTCTGAACACACACCACAAGAAAGTCGACGTGCGCTTTCGATACTACAACCATTGATTTATACGTGCTTGGCTAGTAACATTTCTGCGGTGTGTATCCAGCAACCAAATCCTCATGTTCGAGATTTTCTTTTATATGGATGTTACTTATTTTTCATGAGAGGGGATTTACCTGGACGCCTTAAATTTATATCCGTACTGTATGCTA…	0.009208	E1C5V0	RecName: Full=N-lysine methyltransferase SMYD2; AltName: Full=Histone methyltransferase SMYD2; AltName: Full=SET and MYND domain-containing protein 2
LYa_b1_contig_169045 (1..290) consensus	-22.6373	0	TAAAGTAACAAAGTTATCGACCATTTCCGCCATGTCTGCAGTGACAACGTCCGTCGATACAGTGAGAATCTCTGTCGTGACATTCCACATGGCAGTCTTGGGCTGTCGCGCATGTAGATCCAGATGAAGTCGTGCATGTACATTCACCACGGATACACATAATACTGGCGCCTGTAGAGCACAGTGTTACCTTGCAGTCCCTTGTCTGTTGACATCTTTCAGCCATAACAACTGCACAGAGAGCCAAGCACACAATGAGAACCTTCATCTTAATATTCAATAGTGAGAAG	4.64823	O43497	RecName: Full=Voltage-dependent T-type calcium channel subunit alpha-1G; AltName: Full=Cav3.1c; AltName: Full=NBR13; AltName: Full=Voltage-gated calcium channel subunit alpha Cav3.1
LYa_b1_contig_106537 (2026..4150) consensus	-22.4267	0	AAAAACTTCAATGTAGACGTTTTGTACTCATTTATTTGGGCCATTACATTATGTTTGTCTTTATATCGTTTGTCCATCTTTAAGAATACATTGGTTGAGTGCATTGCAATATGTACTGCCATTTTTACTCGAAGGGCTGCTGTAATTGTATAATTAGTTAAATTGTTGATTCCAGCATTATGCTCATCTATGCTATCTTTTAGTTTCATGAAAACTGTTGTTGCATATGCTTTTTCAAATACAATATCCTCCGACAGCAAATTAGTTAGATATGCATCAATTGTTGCAAAAATTGTATTCATTAAATGAAAAGCCTGTTTCTTGCATTTGTTGATTTCTGTCTTCGGCCAAAATATTTTCCCAATGAGGCTTAGATCTGATGATATGCTGACGTGATTT…	1.09e-116	Q80SU7	RecName: Full=Interferon-induced very large GTPase 1; AltName: Full=Very large-inducible GTPase-1; Short=VLIG-1
LYa_b1_contig_7030 (1..369) consensus	-22.3633	0	ATGAGTGGATCAAGAGACTGGTCCCTTGTTACGTTTGATAATGAAGAGTCCAGTATGGATCGGATATCACGGATTTCATCACCGGTACGGGCACTACGTGAAATGTATAGTTGACGTTTCTTCATCTCTGTGGACAGTTGGTCTTTCAATGTGGCAATTGTTTCTTCAAGACCCTTGATTTTAGTTCTATTTGATCTCTCTCTTGTTTCTAACATTCTTTCAGCTTGCATCTGAGCTGTTCGGAGTCTCTCTGTCTCCATCTCTGTTTCAGCTCTATGTCTTGTTGTAACATCAATCAATCTCTGAGCATGTTGTTGCTCAGCCTCTGCTAACTGTGCCTGGAGCTGTTGTACTTGTTTATTGAGATCA	1.886e-09	Q8CJ40	RecName: Full=Rootletin; AltName: Full=Ciliary rootlet coiled-coil protein
LYa_b1_contig_104854 (1..538) consensus	-22.193	0	ACAATGGAGCTAATTTGTACAGTGACAGGGACAACATGCTGCTCTTCATTGAGAAGTTGGAATGGAGGATCGTCATTTTCCACTCTTATGAACAATGGTGTACCAAGTAATGCTTCCAAATACCATGAAGTTATTAACACTAACTCGTTTAGCCTGTTTATTTACAACATGGATAGATCCGACTTCTTATATGATTATAGATGTTCGTATGGTTTTGATGAATCACCGAGAAGTTTATTGTCTCCTCCAGATAATGCACGATATGTACCAATTCAAAGTGAGATAGATTTGCTATCATCGTCAACAGGAGGAGGCTTCCTGAATTTTGTGGTTAATGTAACAACAGTTTTTCCGGCACCAAGTTGTACTGCAACATTTGAGAATGCAGATTTAACGTCA…	0.401009	B7KEG3	RecName: Full=4-hydroxy-3-methylbut-2-enyl diphosphate reductase; Short=HMBPP reductase
LYa_b1_contig_311977 (5..750) consensus	-22.1915	0	TTTTTTTTTTTTCATTTAAAATGAATTTTATTATATAATCTTATTCATTGAGGGAGGAGAACTTCAAAGGCAGTCTATCTACTAGATTATTGCACATGATCCGCTCCTATTCCTTCTTGGAACGTACGCATTTCTTGTAGGAGCAGGTATATCCTCCACAGCAGTCATTGCTTCGTTTACAAGTTCTTTCCTGACATGACTTGCAGTTCCCGTAGACACAGCTCGATCCATAACAACAGTCTCTCGTCTTTTTGCACTTTCTTGGGAGACATGACTTGCAGTTTCCTGAAACGCAGCTAGAGTCATCACAGCAGTCACGGGTCTTTTTGCATTTTCTTGGGTTACATGACTTGCAGGATCCGTACACACAACTATAACCAATACAACATTTATTTGACA…	0	not available	not available
LYa_b1_contig_297308 (1254..3105) consensus	-22.1603	0	TTTTTGTGTGACATTAACAGACGTTGCATTGTTGTCAAAAGTCCATAGAATATAGGGTTTAGGGTATGCAATTATTGGGACCGTTATATTTAACGGCTCTTGGTCTTTGACTGCAATTAATTCTGATACATTATATTCGATTGAATTTAGCCTTGGAGTACATCTTACATCAATGCCGATCTTTTTCGTATCTTTACCAATAATGTTGCTAGCAGCACAGGTATATGTCCCCATTAATAAGCATCCAATGTGACTGATATTCAGTGTATTAATTTGGACTTTCGTGTTTGGTTCCCGCATATCATGAACAAAAATCATATCAGTTTTTCTAAGGATCTGTTCTCCAAAGAACCATGTTATGTTCGAAGTTGGTACACTCTCCACATTGCATGAAAATAC…	3.704e-23	Q96RW7	RecName: Full=Hemicentin-1; AltName: Full=Fibulin-6; Short=FIBL-6; Flags: Precursor
LYa_b1_contig_451843 (1..423) consensus	-22.1569	0	TTAAACGTGTGTTGAAAAATTCCTCAACAACTGGTGTTTGAGCTCCATGTGCATAATCTGGTGTCATAAATCCAACGAATGATTCAATTTGAGTATGTCCTATTCTAAATACGGCTGCAGCAAATACATTTCTGGTAGATCCATCAACTTTTGGATCGTAAACATTATTATATCCTCTAGCTGTACTTCTGATTCCAAATTTAGTAACTATTTCCTCTCCAAGAATGGCGGGTAAATATTCGTTGTATATTATATGTTGATACATACCATCTAATATTTTTTTCGTTTCCTGATAAATTTTTTCGTCTCCCCAATGTGGATTGATTTTTTGGAGTCCTCGGGCTATCCTGTTATGTTCTCTCAGAAATAGAACGTGAATAACGTTTAATGTTGGTGCGT…	5.319e-31	P82600	RecName: Full=Chorion peroxidase; Flags: Precursor
LYa_b1_contig_340454 (1..904) consensus	-22.1086	0	CTTTGTGTAAGTTCTGTCCAATAGGCAAACTTTTACACTTTTTCAGTTCCATCGTTGTCCTTGCTGATTGAACAACTGATTGTCGATTGACCTTTTGTTTGGGAATTCTATCAGATCTGGATTATAATAAGGTAGAACTCAAAGATGATGACTCAATTACTTGAGTTGCATTGGCCGGAACAGCTGACCCTTCAGTGTCTTGGCTACATAGTTCACTTGTTCTAATTGAATCTGCTGCATTCTCTCTATAAATGAACTGACGACATGACTCTGTCACGTATGACATTGCTGCCAATGCTTCGTCGTGGGAGAAAATCGATTGGGAGTCTGTCTTTTCTGCTTTATTTTCTTTTTGTGACTCATTGTGGTTTATTTTAGGCATTTTACAATCTTGGTGTA…	2.63755	C7Z527	RecName: Full=Lipoyl synthase, mitochondrial; AltName: Full=Lipoate synthase; Short=LS; Short=Lip-syn; AltName: Full=Lipoic acid synthase; Flags: Precursor
LYa_b1_contig_381915 (1..612) consensus	-21.9959	0	GCAATTTTTGATCGAAATTCAGACATCTTTTTTGAGGTATGCTTTCTTGTTTTCAAATCCATATCAAATGTGCCTTTACATGGCTTATTTCCATGTTTTAGAAAATCATACAAAGAGTTATGGACCTTTTCACACTTTCCACATATTAACTTGTCCTCCTTTGTGAATGTACTGACATCATTTCCTTGTACCATTGTAATGGACAGACTTATTCTGATAGGTTCTGTATCTTCTTGTGAATTATTTGCCAAGAGGTTGGTTAGTAATTGGTCAATGCCTTCCAAGAAATTATCTGTGCTTTCAAATAATATTGGAGCTAGTTCAATCCATAAAATAAGTGATCCTGTTTTAGCACAAAGAGTTTCTATGTTCTTAGTACTTCCATCGTTAGAACGCTGA…	0.103978	Q6BV94	RecName: Full=ATP-dependent RNA helicase MRH4, mitochondrial; Flags: Precursor
LYa_b1_contig_108118 (3..639) consensus	-21.8727	0	AATTTGTTTCAACCACATACAATTATATAATTCTAGTATTTTGAGACACCGCAGATCCCATGTTGTTATCTTTATCACTTAAATATGCCCTATTTAGTCAATCACATGCAACTTGGTTGCAAATTGTGGGTTTACCCACCATTGCTAATACACGCAAATATTCATATCACAAAATTTGCCGATTTCTTCCATTAAATGGAAAAATATGTTTGAATTATTTTTTTTAGCTTAACATATTTCAATTGTCAAAAATTATTGTTTATGCTTAGTTTTGAAAGATAGACAAGGGCATCTTAGCCAATTCCAAAAACACACTTATCAAATAGAAAATAAACTTAGCCAAATCCGAAAACAAGCATATCAAATAGAAAGAAAAACAAATGATTTTTAAAAAAATAT…	0	not available	not available
LYa_b1_contig_350112 (1..623) consensus	-21.4537	0	TAACTCGTGTATTGCAATGTTTCTCCATTAGAGTTAGATTTTTACTATTTAAACAGCTTTGCAAGCCTTGTGGGTGGCTAGACATCATTGAAATTCAAAGATCTGGTAAATTCAATCTGGTTTGACTAAAAAACTCTTTTATCAAATTGTTTATGGTTCTTTTGGTTCCATGAAATCAACTGTTAGCTGTAGATTCACTGTATTTATACTATAGTATCCGAAAGGTTCAAGAAATTGTCAAAGTTGTCTGCATTGTTGGGTACCCAGTCTGACATGCATCTCTGTTGATATATCATTAGTTAAAAAATTTAAGTTAAATGTTCAGCTGTTGAAATTGAGAAAAATAACCAAACTGTTTGTACCATTCATCATAAGCATGGTATGTCTGGTTCAGATAGA…	1.163e-11	A8XAC6	RecName: Full=Barrier-to-autointegration factor 1
LYa_b1_contig_43793 (1..1801) consensus	-21.4438	0	ACAATGACCCTAAAAGGGATACGACATGTCGTTGTGACTATACTAAAGGATATGATTTTGTCCAACCACCACTGAACAATTGTTTTTGCATTCCATCCCAGGAAGATTGTTCTTGTTACGTTAAAGCCTGCATGAACATGTCACATGTGCTTGATCCAGGATACAACTGTGTGGATGAAAACAACATATCATCATATGAGAACAACACACGCTGTATGCCGATTCAATTGAGAAAAGGAGCGTCTACGAACATAAATATCATAACGATAAACCAAACGATGTATCGGAATGGCGTATCAGGTTATTTTATTCACAAAGAAACCGCAGCCAAAGTTATAGTGGGCATCATTCTTTTTGCAGCTGTCGTTTTATGTTTGCTTTCGACAACACCACTGAACG…	0.0645787	P68874	RecName: Full=Gametocyte surface protein P230; Flags: Precursor >gi|57014116|sp|P68875.1|P230_PLAFO RecName: Full=Gametocyte surface protein P230; Flags: Precursor
LYa_b1_contig_28624 (1..714) consensus	-20.9115	0	AAGTACTGTCGCGTTCTAATTTGTCTATATTACCACTCTTAGCTTCTCTAGATTCACTGTCCTTTTGAATGTCGCTTGCGTTAAGGAAAGAAATATTTGCGTCCCTTACGCCCGATATGATACCGGATGTTCTTGTTGACAGAGCACTACGCTCATTTTGTTCGTGTGGTTCAACGTCCATTTCCTGAGTAGAAGTCGCTTCTGCCATGTTTGATTGGAAAGTAGACTGTAGTCCTATATCAATTGTTGTTTTAGTTGGTTGTGTTGGTTGCGTAAAACCGGTGCGCGAATCATCTAATCCACGTAAAGCACTGTCACTTTCTTGCGTATTAGTAACATTGTCAAATTGACTAGGCACTGTAATTTCTTTAAGTTTTAATTCCTCTTCCTCGGATTCTG…	0.79941	Q8VEW6	RecName: Full=Olfactory receptor 510; AltName: Full=Olfactory receptor 204-34
LYa_b1_contig_349534 (1..1418) consensus	-20.8669	0	AATTTGCTATGCCATTATTACATATACCATACAACGCATTCACTTGATAAGGTTTTGTTTTATGTCTGTAAAGAATATATTCCCCTGGTTTGTAATCGTCCCATCTGTATCTATCAGATGTATAAAAGTGAGGGTCGTTAAACGATTCGCACACTCTTCCAGACATCTGATGTTCATCGTCGGTGACTATAATCTTAATTTCAGGTATCTGTACATCATCCCAAGCAAAAATATCTTTATCAACATAATAATTATTTTCTTGCGATAAAACTTTTAAATACGTTGTTCTATCAACGTAGTCGTACTGTCCATTGACATATCCAGTTACTTTTAAGATAAGAGGTTGATCCCACGTTGCAGATGTGATGTTGTAGGAGCAATCAGCACGTTCAAATGACA…	2.016e-13	Q6V0K7	RecName: Full=Oncoprotein-induced transcript 3 protein; AltName: Full=Liver-specific zona pellucida domain-containing protein; Flags: Precursor
LYa_b1_contig_69029 (1..416) consensus	-20.6438	0	TTTGAACTTCATTTCTATATGAAAAATCTCCTTTTACATATATGTAATTCCATCAGTCAACCAATGAAATTGGTTGCTTATAGACACATTTTTGACTTCTTCAATTTTACAAAATTCACATTTTTAAAATTTATCAATTTGCAGGGACTTTTCTGTAGTACTACTGACAATTAAGATCATTTATATCAGTGTTTCTGTAGTGTTGTTGACAACTTTTAAGCTCAGTTTGAACAATGAAAGCATTACAATGGCTCTTGTTTTGAAAATCAAACTGTATAGTGAGGTAGGCATATCTGTTCAGCCCTAGAAGCAACTGGCTACCATTTTGGAGAAAGATCATATGAAATCAGACTAATAGGCAGAGTTAATAAAGGAAAAGCATTACTTGCACTAATTATT…	0	not available	not available
LYa_b1_contig_188345 (130..952) consensus	-19.4789	0	CATTGATTTTGAAGTTCTGGTAGCACTGCTAAACTAACATAGCAATCGAAATAATTGACGCCTTAATCTTGAAATGGTTAATAATTATTGGATAATTGCTTTAACTTTCTTAAGCGTGGTTCAGCTATGTTTCTCCGAAAAACTTGAGAAAGGAAAATATGACAGGTTATTGTCAGATAATCCTAGTGGGAAGAAAAGGGGTGACGAGTTTAACTTGTTCAATTCACAGAAAGAGATGTGTGAAATGAAAACGGCTCAATTAGAAGATAAACTGCGACAGCAAGAAGTAAAAATGAAGAATCATGAATCGAAAATCGACGACCTTAAATCTTTGGTAAAAAACCTTCAAGTTGTGATCTCGTCTAAAAAGATAAAGCGAATCACAAAGAATCAAGACCG…	1.226e-14	P83425	RecName: Full=Heavy metal-binding protein HIP
LYa_b1_contig_149231 (1..1159) consensus	-19.4659	0	TTGGCATGACATGTGTAGGGAAGTCGACTTTCATCAATGCTATTCGTAATTTAAATGAAAACGATGAAGGATTTGCAGAGGTCGGACTAGGAGATACAACATTATCACCTACATCTTACTACCATCCAGAGAATCGAAATATTTCATTTATTGACCTTCCAGGTGTAGGCACAGCCAAGTTTAAGAAAGAAAATTATATTAAAGACATGAAAATAAGTGAATGCGATTATCTTTTCGTTTTCTTTGGTACCGTATTGCAGGAAGACGATATCTGGATAGTTAACCAATTACAGAAATTAAAGAAACCATTTTCTTTAGTAAGATCGAAAGTAGACAAAAATGTCAAATTAGGATTGAAACATAACAAATCGATGAAAGAAGTCTTAATTGGACTCCGGG…	1.833e-26	Q62293	RecName: Full=T-cell-specific guanine nucleotide triphosphate-binding protein 1; AltName: Full=Interferon-gamma-inducible GTPase Ifggb5 >gi|1100165084|sp|Q3T9E4.2|TGTP2_MOUSE RecName: Full=T-cell-specific guanine nucleotide triphosphate-binding protein 2; AltName: Full=Interferon-gamma-inducible GTPase Ifggb6 protein; AltName: Full=T-cell-specific guanine nucleotide triphosphate-binding protein
LYa_b1_contig_39967 (1..249) consensus	-19.3184	0	TTACACCTGTGTCGGTACCTGTACAGTATACAATGTCTGGAAGGTTGTTATTCTGGGGCTCTGGTAGTATTCCTTGTTGGAAACCAATGCTTGTACTGGCAGAAAAAGGCATCGACTATGAATCAAAACAAATCAGTTTCAGTGAGAAAGGACACAAAGGACCAGAAGTAATGGCCCTCAACCCCCGTGGACAGGTGCCAACATTTAAGGATGGAGAAACAGTAATCTGTGAATCTAATGCTATCTGCT	6.746e-20	P30568	RecName: Full=Glutathione S-transferase A; Short=GST-A; AltName: Full=GST class-theta
LYa_b1_contig_366505 (123..3227) consensus	-19.0483	0	CTCTCTTTATATGCTAACCAAACACCCCTTAAGGCAACATTATCTAACAAGCACTCTTATCAAAACTCTGTTAACGGTAGTAATTGGCTCTGTAAAGCATGCGATTCTTGTTGAAATTTTCTTAGAGTAACTATTGATACGCTTGATAATTTCATGCTGAGCATACGAACCACACTATAAAGTGTTTTGCTTCCATCCAGTTTTAGATAATTTTCTTTGACAGTTGTTTTTTTACAATTTTATTGGGATAGTTCTCTGAAGCCCTATCATGGTCTATTTAATTCTGCTACGGTTATTAGTATTTAAAACTAAGTAGCAAAAGCCGAATAGTTCCATTTTGTGAGCAAACAACTAAACATTTTTCCGGTTCATCAAAGAAGACATTAGAGAACGGTGATA…	3.191e-14	A2ASS6	RecName: Full=Titin; AltName: Full=Connectin
LYa_b1_contig_133564 (1..271) consensus	-18.8422	0	TAACAGATGACCCGACAATGCTACTTAGTGCTGGTGTGGTTGGTGTATTTTGGATAACATGAGACATAGATTGGGGTGAGACTGATGTTGTCATAACAGGTGCATGGCTATTTAGTACCAAAGGAGATCCATTAATGCTGCTTAATGCTATTGTTGTTGGTGTAGTTAGGATAACATGAGACATAGATTGCGGTGGTACTGATGTTGTCAAAGCAGGTGCCTGGCTATTGCTTATTACAGACGATCCAATAATGCTACTGAATGCTGGAGT	4.10657	P70375	RecName: Full=Coagulation factor VII; AltName: Full=Serum prothrombin conversion accelerator; Contains: RecName: Full=Factor VII light chain; Contains: RecName: Full=Factor VII heavy chain; Flags: Precursor
LYa_b1_contig_2778 (12..8441) consensus	-18.5615	0	GAGGAGACATCATTAACATATTGACCCAGTCTTGTTCCTGGTTTCCTGTTGACACAAAGGAGCCAGGGGCACCAGCACCACTAGGTCCACCTGGAGTAGAGTCAGAGCTGCCACCTACTGGAGGCAATCTACTTGTGAGGTCATCTTCTGCTTGTAATCTGGCTAAATCTTCACGATGTTCAGCATCCATGTCTAACAATGATTCTTTCTCTAACTTTGCCTTATTGGAGTCAATACGATTTTTCTTCCTGGCATCCAATCGAGCTTGGAGGTTAGCTTTGCTGCGAGCCTGTTCTTCCTCCATATTAGATTTCATTTTGTTGATATGTTCTTGATGTTCCCTTAGCAACCGTTCCTTCTCATCTCCATTGACATTCATCTTTTTGATCTCATCTTGTT…	1.27912	A6BM72	RecName: Full=Multiple epidermal growth factor-like domains protein 11; Short=Multiple EGF-like domains protein 11; Flags: Precursor
LYa_b1_contig_9580 (25..690) consensus	-18.0617	0	TTTTTGTAACTAAGGACGGAGGATGTGATGCAGTTGTTCCTGCCTTGGATGGAGCTTGCGACGCCACAGATTCTGCTACAGATCAATGTGCTATAACTGACTCGGAATGCAGAGTTGATGGAACTGCCAAATGCCTCTGTAAAGCCACCCACTATGTAGATGGATCCGCATGTACAATCAGAAAGGCTCCAGAAGACACTTGTAGTGGAGATGTATGTGTAACCCATGCTACTTGTGACACCACATGCAAATGTGATGCAGGTTATACTGCAAGTCCATCCACCAATCCTACCATGTGCAGTGGAGTTGTCAAATTCGCATCTTTGTCATACATGTACGTGGTACCCATCCTTGTGTCCCTGATGTTTCTTGTACGATGAATATTTATTCTAGATCATT…	1.31796	Q15375	RecName: Full=Ephrin type-A receptor 7; AltName: Full=EPH homology kinase 3; Short=EHK-3; AltName: Full=EPH-like kinase 11; Short=EK11; Short=hEK11; Flags: Precursor
LYa_b1_contig_33842 (6..2128) consensus	-17.9289	0	GTGAACAGTTGAGCATACAGAAGTTTAATGCCAGATCATATACCGAGGAAATATGACAAAAGAGCAAGACAATTTTTTAAGGATTTGTTTGCTGGTCTTTGAAAATGCAACACAAGTATTAATACAATTTCTGGACAAATGTTTATTAAGAAGGAAGCTGAATTTTCATTTGTTTTTGAATAACAATCATCATGATATTTATCATATGTGTTTTCCGAAAACATGTTGCAAATGTTCGAAAACTAGAAATAAGGTGTCCAAAAGATTTTTTTCTGTTGAACAATTAAAAGTGCTCTTTGATGGTTCTAATCCACCACCAGCAAATCACACCGAGTATTGTTGTTCTACTGTAAAACCTGGGATATCGACCAAAGATCTTGATATCTCCTTAATCAACAG…	1.33866	Q5WFG1	RecName: Full=Ribosomal RNA small subunit methyltransferase H; AltName: Full=16S rRNA m(4)C1402 methyltransferase; AltName: Full=rRNA (cytosine-N(4)-)-methyltransferase RsmH
LYa_b1_contig_351155 (1..769) consensus	-17.7238	0	ATCCATTCATTTTCTGTAAGATTTGTACTTCCAATATTGCTGTATGTTTTTCCTGTATGTAAGATAAAACTTTGACCATTGATGGACCATTGTACATCATAAACAAATTTAACTCCGTCATCTCCGTATACTTCGGCAAATTCACACTTAAACGCTGTTACCAAACTGTTTCCATAGAGTGGAAAGATCACAGGACCAGGAACTAAATCTACAATAACTTCTGCTGTTCCTACAGTTTTTTGTGGGAATATCATAGTACAACCGGGGTAAAATCCAGTGTTTGAAGAATATCCATATGGACATTGAACAAGTTTTGATCCGATGCAATATGCTGAATTTTCTGTACTACTGCTAATTAGGTCATAAACATAGAAACCGCTACAGTTCTTAATCCTAATG…	1.047e-16	Q8R4V5	RecName: Full=Oncoprotein-induced transcript 3 protein; AltName: Full=Liver-specific zona pellucida domain-containing protein; Flags: Precursor
LYa_b1_contig_298735 (1..423) consensus	-17.4745	0	CATTATCTCGATCAAAAGTAGTGAACTTGTGCCCATTCTGTCTTGTGAAAGAATCACCCGCAGTTCCATCATATTTACTGACCATCAACTGATAACCATTAACCTCAGAAGACACATAGAACGAGAGATATTCTGCAAACTTGGTTACCCCACTAAAATCTGTCATTAGTATCATCAATGCATGGTTTGAAGCCGCTGTCAGCTCATGTATATTGTCATTTCCTAACCAATATTCTTCGTTAGCTTGTCCAAATCCCGTTTTGTATGCTTGCCAGTTTCTATAAAAGTTGACTGCTCCATCTATTCGTCGTTGAATAACTGTCCATGAATGCAAACTTGAATCAACATAGCAATATACAGATACAGGTTGTTTCAATCGACCATAGGGGTAAATAGTAT…	1.693e-36	Q9WTS8	RecName: Full=Ficolin-1; AltName: Full=Collagen/fibrinogen domain-containing protein 1; AltName: Full=Ficolin-A; AltName: Full=Ficolin-alpha; AltName: Full=M-ficolin; Flags: Precursor
LYa_b1_contig_301659 (88..706) consensus	-16.9018	0	CAAGAAACACATGTATAGATTGGATTTATAGAAAGAACACATATCAATCAAGTTATTTTGTAGAAAATCAAAGGCTCATATATATTGCTATGGATTTTTGTTTTTTCAGCCAATGGATTTTGTTCTTGACATTTTCAGCCCGTAAAATGCAATTGTCAGTTAAATGTGATTGCTTTTTGGAAAATTCCACGAGCGGATTCTATAATTACATCTCGTGCAGTACTTGCCACTTTTACTGCTAAATCGCGAAAAAAATCCTTTGATTTATTGACGAGGGTTTTCTCAACCCACCTGTAATCTATGCCATTAGCATCAAAGCGAATAACCAACTTGTTATAACACTCGCCATTCTGTACAACAATGGGTGTATCTCCATCGTCTATATAAATGAAGACCTCC…	4.91704	Q98UF9	RecName: Full=Zinc metalloproteinase-disintegrin-like HF3; AltName: Full=Snake venom metalloproteinase; Short=SVMP; Flags: Precursor
LYa_b1_contig_301597 (109..904) consensus	-16.7504	0	CATAAGATAAGAATTTTGCTTCATGTACAAAGACAATAGTATTTTAAGCATAACACACGTATTGATAATTAAAACAAAAGCTTTCTTTGTCAGAGCATTCATTACTTGTGTCCAAGACCACCACAGTTCGTACACCGCTCCAAATTATCTACTAGCCCCGTCCCTCTGCATGCTCTGCAAGCGTCAGGAGGTGCTAGCTTGTTGACAAGTTGCTTCGTACCTCCTCCTAATACTACCCCACCTACAACAACACCAACAACTGCTCCTACTGGTCCACCGGCAAGAAATCCAAGAACGCCCCCTGATAGAGCACCATATACTCCAACACCAGCTCCTGCTAAATTTGAACCGAGAGTTAGATCCTTGACAGAATAGTAGGGGGCGACGGTATTTATATTG…	0.63441	A7NS65	RecName: Full=Chaperone protein DnaJ
LYa_b1_contig_39307 (1..535) consensus	-16.4963	0	CTTATACGTTTACTGACAGTGTTTAGGAACCACTTCCTGTTACGGATTTTAGGGCTTGTCAATCCTTCAGAGTGAAACACTGCACCATTTGTCTTCATGGACAACGAAACACAAGAATCTTCTGGTTTCTGGATATCATTTGAAGTTGTATCTTTCATTGGCTCCATCATATATTTCTTTGCACTATCAAAACCCATTATAACATCTTTTGGACTACTGTTTCCTTGTAGTCTTATGTCCTCATCTCTGATTATATGTAGAGTTATGCCTCTATTTAACAGGATATTTTTCAGATAGTTGTAATTAACATTCTCTGAAGCAGAACATTCCCCACAGTGGAGAAGGACAATGGTCTTTGAAACCCCTGTTCTGAATGGCATGTCAGCTGCAGTCATGATA…	0.389805	Q8HEC4	RecName: Full=NADH-ubiquinone oxidoreductase chain 1; AltName: Full=NADH dehydrogenase subunit 1
LYa_b1_contig_144394 (76..1631) consensus	-16.3923	0	GGCATCTAAACTAAATTCAGTTAAAGATGAATGTTATCGTTTTGTGACTGGTAAAATTGATCAAAATAACAATATGCGAGACATTTTTCTATCGAAATCAGGTTTAAGCGTATACCCTGGTAGGATTCAAACATCAGAAGAATACTGTCATAGAAAGGACATCGTAGAAAATCAATTAAACACTATTCAATTGAGGTTTAGAGAGCTTTATAAACTGAAGGAACTATCCGACTTGGCTTTGGATGAAGAGAATTCAAAAGTTGTTGAAAAGTTAGAACAATTTCAGCAAAAAATTAATAGAGAGATTAATGGGCATATAAAACGAATCAGCGAAAAATGTAACACTGCTGTAAACCTCTTCAAAAGGAAATCAACCATTAATTGGAAGTTTCGAAAAGA…	0.426208	O51055	RecName: Full=Uncharacterized protein BB_0024
LYa_b1_contig_177424 (4..2177) consensus	-16.3884	0	AAACAGTTGACAATTGTCTTCTCTAAAGAGCCTGTATAATGGGTTTGTACAGAGATCTGCATCATACTCATTACAGTTAGATATTTTGTTGACGCATGGTGGTGGTGGTGTATTGACAATGCAAATACCACAATACGCCTTGCATCTAACATTTGCCCATGGAAAATAACTACTATTGGTTGGGCAAATCCTTTCTTTTGGATACGGGCGACAGTTGATTAAATCTCTACAATCTCTACCTGTATGATTATAATCTGTGAAATTGTCTGGTGTTAATGTGTCAGGTGTTAATCCTCCAGATGTGGCAGTTACCGGAATGCTAGTAGATCCAGAACCTGCTGTACTTCCGCCATTTGAAGGACCATTTGAAGGACCACCACCGGTTCCAGTACCAGTTCC…	1.594e-29	Q60847	RecName: Full=Collagen alpha-1(XII) chain; Flags: Precursor
LYa_b1_contig_61514 (149..680) consensus	-16.2326	0	TCCCTATGGCTACCCTATGGGCTCTCCCCCATCCGCTTCCTGCACTTTCATTCTCGCAATATTTCACGAACTCAAAAAGATGTGTAGGAATGCGACAAACGTCACTTAGTGCACGATATGCAGCATTTTTTGTTTTTAGATCGTTTGATCTTGCGCAAACTGATAAGGCGTAGATAGTGGTATTCTGTTTGCAAGCCCTGCCATTGACGCTGACGTCACGAATGAAGTCTACAACCTTTTCGCCCTGATCAGTCATTATCAGCCTGTCTATACTTTGAACATTTTCTCGTTTGAGTTCTTTCTCGGAACTGTAATATGTTCCTCCTTCAGCCCCTAGTATCAGAAATCTCAAAAGACGAGTAAAATCGTCAACTTCATACGAAAAACCTCCTGCTTTAT…	1.133e-36	P42700	RecName: Full=60 kDa SS-A/Ro ribonucleoprotein; Short=60 kDa Ro protein; Short=60 kDa ribonucleoprotein Ro; Short=RoRNP; AltName: Full=TROVE domain family member 2
LYa_b1_contig_350399 (605..1963) consensus	-16.1342	0	GCTTATAAATATTACATTCATTTAAAATATGAATGGTTTAATAAAATTTTGATACTGCTTTAAGTAAGAGATTAACAAATATTCATTGTTGATTATATTCAACGGAAAAAAGTTCAACAGGTGTTCTCGGTCTTGATATGTTGTCGGTTTCAAGATTGACAGAAACATTTCCTATTGAATTGGTACTTTTTTCTCTGTTATATTTGTCTGGAAATTGAGGCTTCATGGCAGTTTGATTCGGCGGAACTTGGAACTGATATACCAAATTGTCTTCCATATGTCCATTTTTCTTAACTTTCATTTTGTAGTAAATCATCCCGCTAAGAATAATAATTATGAGCACCACAACTCCTGTAAGGCCCCCTAATATGGCAGCAATTTCATTCGATTCTATATTTT…	1.98377	O67295	RecName: Full=Sec translocon accessory complex subunit YajC
LYa_b1_contig_349805 (1..841) consensus	-16.0637	0	GTTGAATTTTACAACTAGTGGTCAACAGAATATTGTGACGAATGATCTATCGGTTCTTATTCTTATTGTAATTTTTATTATACATGTAGTACTTTTAACAAAAAAAAGATTTTGGGAGGAGGAGAATAGGCTTTTAAAATATTTTTGTTACCAGTCTTATTTGGTCCTTATATGATTTAAATAATACATGCTACTGTTCAATTGCTTTTCGTCGTTCATACTTATCGCAATGTCGGATTTGAAGAAATTGGAGCCATACGATTTAGGTTCCTCAAGTTGTTCTGTGAAAAATAATGTACCCCTTCAACTTGTTGAGACTTTCTTTTAAGGCAGTTGGATAAAACATTTTTTTGTAAAACCAGTACGGATACTATACGGTTGTATACAAATTTCCTTTAC…	0	not available	not available
LYa_b1_contig_184054 (9..1150) consensus	-16.0548	0	GGATATGCTTTCTCCTCAAGAGATGATTTTCAAAAGGACCCTCTAAAAATTGTTGCCAATCAAGCTTGGAATGCTGGGAGTCAACGACACTTATCTCTCAAGACACCAACGTGTATACTCCTTGATGATAAAGAAGAGCTTGTATCCTTTGGATATGAAGCAGAAAATAAGTATGCCGACGTTGTTCTTGAAGGACAACAAAGTGAATACTTCTATTTCCAACGTTTCAAGATGCAGCTATACAAAAACGAGGATATCAAAGGGGAAATGATAATAGAAGATGTCACTGGAAAACCACTCTCGGCTATGAAGGTTTTTGCAAGTTCCATTAAGGCTCTGATGCAGCATTTGTTTGATATTTTTGATCAACGAGGAATAGATATAAAAAAGAATGAAATT…	1.591e-66	Q96MM6	RecName: Full=Heat shock 70 kDa protein 12B
LYa_b1_contig_350906 (3..735) consensus	-15.9475	0	TTTTTTTTTCCAATCGTTATATTTTTTAATCATGCAATTGACTTTTAGTTACAGGTAAGTGATAACTATTAACTCAAATAAAACATAATCATGTCTCCAGCAGACGGATGACGGATTGTGCTTAATCTTTCGCTGCGCCTATTTATAGTTCATCGCTGTCCTGACTTATTCGATCTGAATACGTTCCATCCTCTTCATTGTCCAAGCCATGCGATATGTCTGTTCCTGTGTTATTTGAATCGTACTTACTATGCTGGAGCTCGATATCATGTGATAAAACCAAATATTTCGCTTCAGTTAAATCTACTTTACAGTTGAAGCCTGTAACCAAACTACCATTAAAAGAAATCAGAGTATGTTTATCATTTTCAGGCTGGATACTCAATTCCAATGGATTTT…	0.0361088	O54891	RecName: Full=Galectin-6; Short=Gal-6
LYa_b1_contig_26864 (1..452) consensus	-15.6972	0	CCACAAGGAAAACCACCACCAATGGAATTTACAGATTTAGCCAACTTGGATGAAGCAGCATGTAAATCAGCTATGATTGAACATGTCAACCAAAACTGTTGCTATGGCAAGAAACCAGCCAATGAAATGAATCTTTCTAAAGCCATAGGATTAACGGCTTTACATTATACACTTGAGACCTTCTGTGAAGGAAGGGACACGGGGTATGTCAATGAACCATATAGAGGTGGACCTGTGGATGGACCCCAGAATGGTCCACCACCGCCACCATGGGCAATTCCATGCCAACCAAACGGAATGTTTGAAACCCATACAAAGGAAATGGAAGTTCCACATACAGCTACAGTCAGGCCTTGTCATGACTGTGATGCCCGGGGATACCACCGATGTTGGAGGTGT…	2.51e-16	Q8C3L1	RecName: Full=Protein SSUH2 homolog; AltName: Full=Protein ssu-2 homolog
LYa_b1_contig_349535 (676..2126) consensus	-15.5677	0	GTTCCTTCATCTTCCGTCTCCCCACAAATACAATATTGCTGAAGGTGAATTTCTTGACGCAGTACTAGGGGTTTGTCTACAAAGAATCTTTCAGCATCAAGTACCCTCCAGTTTTCTGCAAACGTTTCCCAATTAGCATGTGAAGTTGCTATTGTGGTCCCATCTCTTAATGTGAAATCATCACTTGTATCCATTGAACCACCACTAACGTATCCACATAGTCCTTCTGAATTTTCAACATCTAATAGTGATGGCTTAACATGTATATAACCAATGTACTGGTCGTGTCCCCATCCCGATGACGTCGAAAATTTTACTTCGGTCCCTATTGGCAAAGTCACCGTATAAGTTCCTCCATTTTCCTTAATGATCATCGATGAATCATCACAACTTCTCATT…	2.222e-12	Q6DFV8	RecName: Full=von Willebrand factor D and EGF domain-containing protein; Flags: Precursor
LYa_b1_contig_102952 (70..625) consensus	-15.5058	0	GGCCCGCAATAGCAGTATCCTTTACCAGTTCGTTCCATTCTTATCCAAACTTTGTCATTTTTCTTCAAAGAAAGAACACCCGACTGTGTCGATGATTTTTCCTGTTTACTATCTGCATTCCAACCATGATTTGCGAACCCAGTATAATTGCCATTCTTCACAAGTTCAGTAGGACAGGTTCCACCACCGTTGGTATACAGTGTCCAGGAAAAGTAAAATGTACCATCACGTGGGCTGGTGAAGACGCCGGTTGTTTTATCATAGTTAACCCCTATGTTTGTTCTAACGATGCCAAATATGATTTTTGTATGCTTTGGCAACTTCGACAGATGTTTGTGTAAATTGGCCGAGAAAGCTGACTTTACACAATCGCTTGTTACACACCCGCATTCATCAGGA…	9.667e-10	Q9BXJ4	RecName: Full=Complement C1q tumor necrosis factor-related protein 3; AltName: Full=Collagenous repeat-containing sequence 26 kDa protein; Short=CORS26; AltName: Full=Secretory protein CORS26; Flags: Precursor
LYa_b1_contig_349701 (1..674) consensus	-15.2928	0	CATCATTGCTATTTGTGATTTTCCGTCGACTTTTACGACAATATACTGCAAGTAACACGGACAATACAACAACGACTATGATCAAATTGACACCCACAATGACAAATATTTTAACATAATCTGTAGTTTGCTTTTCCAAAGTATTTTCCGTATTCGCATTTGGGGATGAAGTATCATCTTCTTTTACTGCACATACATCTAAAGTACCAAAGCAGTATCCGGAAGATGCTATTTTGCTATTCAGTAAATTGTATACAAAAAAGTCTCCAGCGCACAGCTTTATGTCTACATTCCACGAATATAAGCATGTCTGTGTGAAGCTCTGCAGGCACACTGTTTGTTGTACCTGTTGTCCCGGGGTTGTTGGTAACTGTCCATTTAACCAAATTGGATACCATG…	7.518e-09	Q862Z3	RecName: Full=Uromodulin; AltName: Full=Tamm-Horsfall urinary glycoprotein; Short=THP; Contains: RecName: Full=Uromodulin, secreted form; Flags: Precursor
LYa_b1_contig_350106 (12..1926) consensus	-15.2746	0	GCCAAATAAATTTCAGTGAATGTGTTGGGTACCACCTTAAATGTAATTGAGATAAATATATGTAGCAGTTTTTAAAAAATCCTGAAACTTTGATAAATTGTATTTCCAAAGAATTGTTATACAAATTTAGAGCAAATCCGCTAGCACGGGACAAACGAACTATCGAACGGATGGTCGAACGGACAAACAATTTAATGACTGAACAAACAGACAAATAAACATAACACTGCTGTATCGTAGTCATGATATAAGTACTAATATTTTGAAATTTTCGCAAATTATACTAAACCATATTAAAGAAAAAAGATAAGAGTAAGGAACCCCTATGAAAGGCGTTCTTTTTTCTTTGACCTATAATACTTGAGTATAAGACTGGTTCTCTGTACTTTATCTGTTTGG…	1.548e-11	P27590	RecName: Full=Uromodulin; AltName: Full=Tamm-Horsfall urinary glycoprotein; Short=THP; Contains: RecName: Full=Uromodulin, secreted form; Flags: Precursor
LYa_b1_contig_4610 (1..1006) consensus	-14.861	0	CATCGTTAATAGCTGTTTATGTAAAATTTACTGAAGGAGTATGCAGTGGATATTTCTATAGTACTTGTAGCGCATACAACTATTATCAGATAAGATATGACACATCTTGTGGAAAATGGGGCGTTTATAGATGTACTAGATACAGACAAAGCGCGAGAACAGAATACACCAAATGTATACAGAAATGTCCAACAGTGCATGGTGGATGGAGTTCCTATAGTAATTGGGAAACATGGGGTAGTTGTTCAAAGACATGTGGAAGTGGTACACAGTCTACACGGAGACGGAGGTACTGTAATAATCCTACGCCCATGAATGGTGGAAACGGTTGTTCTGGATCTAACAGTTTAACAAATAGCAGATCATGTAATACCAACAATTGTCCTATAAATGGGCAAT…	1.121e-51	Q96RW7	RecName: Full=Hemicentin-1; AltName: Full=Fibulin-6; Short=FIBL-6; Flags: Precursor
LYa_b1_contig_7546 (1..716) consensus	-14.5152	0	CCAGGTAAACCATATCTTAATGAAAAATAAAACTCAAACAAATCACTACATTTGTTTTCAAGTGTGTATGTGACCGGTTTGAAATGGTCTTTCTCTTAGGTTTCAGAGTACATTGACCTTGCACATAATTCGAATAAATCAGCAAGCGAGCGATTTTAATTTGTTAACTCTTGCAGTTTGTTTAGCACTCTCCTCACAAACTACACTGAACATTGGCCTAGTAAAAGCTCAATGCTATATTTTACGTGTAAAGAATTAAGAGGTAATCTTGAGTAAATATATTTCACTACACTGTTGTCAATATAACGGAATTTGCTGCGACTGTAATACAAATGAGGGGTTTAACTAGCTATAAAAACCAGTTTTAATCCAGCATTTTCTACATGAGTACCAAGTCAG…	0	not available	not available
LYa_b1_contig_57433 (1..633) consensus	-14.4432	0	AATAATATTTCGTTTTTACCCAATAGCATAATCACAATACATATACAGACAGACATAATAATAATTCTTCAGACTGTAATTATATATATTCTCAGTTTGATACGTGATACTCAATGAAAAAAATGGTTTTGACAGATCCAAGCAGGCAATAAAATTTTACTCAAAATACCCAAGTAAAGAGAAAGTACGTCAGGAATCCTTTTGATATCTGACAATTTACAATATAGAACATCCCCAACAGCATTGTTGGGGGTAGTCGGGTGCATGGACTTTTCTTTCTAGTCCATAGACCCAGAATCTTGAACTAAAGTCTTCCCAGGTGTAGTTAGCTTCTGTTACTGGCACAGCACGCAATCTTTGTCTCTGCTGAAGCTGTCTTTCATTTGGAAATGCACTTCT…	2.32e-18	Q9Y2M2	RecName: Full=Protein SSUH2 homolog; AltName: Full=Protein ssu-2 homolog
LYa_b1_contig_73103 (1..3861) consensus	-14.1734	0	AATTGTATGCGACTGACATACAAGTGAGAGGTTTAGCTTGATATAATATTTAATATTCATTTTCTACATAAGAAAATGCCTGTACCAAGTCAGAAATATGACAGTTGTTACCCATTCGTATGATGTGTTTGATCTTTTGATTCTGGCATTTTATTTACGACTTTCCGTTTTGAATTTTTCTCGGAGTTCGCTATTTTTTATCTTTTATTTTTTAAACAAAGACCAAGGCATTATTTGGTAAAAATGGGTGTTTATTGGGTTTTTTTTTTCTCGAGTAAACGACACATTTCTTTAATAGCACTTGTTTGGCTTCTGAACCCCAATCACTGATTACATATAAAAAAAAAGAAAATGTGGTATGATTGTCAATGAGACAACTCTCCACAAGAGACCAAAAGG…	1.88866	Q6BWC0	RecName: Full=Nuclear transport factor 2; Short=NTF-2
LYa_b1_contig_176881 (1..2062) consensus	-13.6245	0	GTTTAGAGTCTGATTCGGATAGCATCGCATGTCATGAAGGAATTAAAGTAGTAGAGTCTATATCAATAACTGACATAAAACGACCTATATTGCTTATAGTTAGAGAACCAAACACACCAGCTGGGTATGTTAAACTGCAACTTGTAGCATGGTGTGTACCAATCATGTTGAAACATTGGCCTGCTATATGTGTTCCTTGTCCCAGTATCAAACCTTTCTTTACAACTGATAAATTTGATCGAATAGTTGTGACTGGTATACTAACTGAAGCGTTGGATAAATGTCCTTTATTTGCTAGAGCTAAGAACAAACCGGCAGCAAAATTGGAAAATTATCCTGCTATCAATCTTGATCTAGTGCAATGTTATCGATGCAAAACGTTGCCTACAATGGCAAACG…	8.303e-08	Q8UUZ1	RecName: Full=Protein mab-21-like 2
LYa_b1_contig_250430 (1..850) consensus	-13.0634	0	CACTATGGTCTGGCATATCTTCCAACGAATAGCGGTGTACCTGTTTCGTCATCCTGAATCAAAAACAGGAAAGGATGATCGGCTACAAATTGGAATGGCTGTGGCTTAGGGTCTTGTACTGAAGTAACGCCAAAAGTTATTGTAGTAACAGCTGCCGCCTCGGTTCCCTCTTCGTTCACTTCGATATAAGCTTTGTGACGAGCATCAGTCACGCTGACGGGTGTTTGATTTGATTCGAATATTTCACTAAAGTCTGCAATTTTGTCGTCAAAAATTTCTGTAATTCCTAAAGCTGTACAAACTGGCTTTAAATTGTACTCGCTTGTCATTGTAAATTTTGGAATTCTTATGAGTGTCTTTTGTGTCTTCAGACCTTTTACAAGTGAATCGACATTATCT…	2.569e-56	P50453	RecName: Full=Serpin B9; AltName: Full=Cytoplasmic antiproteinase 3; Short=CAP-3; Short=CAP3; AltName: Full=Peptidase inhibitor 9; Short=PI-9
LYa_b1_contig_72662 (499..1534) consensus	-12.5466	0	CAGTACCAAGATCATATCAAAGAACTGTTGCTTAGCTTGTTAGCAGACATGCTTACTTTGCTTTCAACACAAGAGATAAATAAAGCTTTCTATCTATCTCTTAAAAAATCATGTGTGTTAAATCCCAATATCATGTTAGAACTTGCAAAGACTTTTCTTGATATTAGCATTAACCCTAAAATTTCCCAAGAAAAAAAATTAATTATTGGAAGCAAAATACAACAAACATTAATTACCCGTGATACAAGTAAAACAGCATTGCCACCAAGTGATGAATTTGCTGATTCCACAGAGATAAAATTGGACCATAAGAGAATAATCAATATTTGTATTAATATTGTTAAAACTGAAAGTAAAGACATTAACATCCCAATGTATGAAGGATTTTTTTGTACAGAA…	0.656266	Q1AS60	RecName: Full=Glutamate--tRNA ligase 2; AltName: Full=Glutamyl-tRNA synthetase 2; Short=GluRS 2
LYa_b1_contig_118921 (1..1201) consensus	-12.34	0	TGTATTTTCAACAACAACAAAAAACACTATTCTCGCTGTATTTTATATTTCTCCGGAAGAACTCCGAATGCAAGACTGGGTGGAAGCTGATGTGAAAATGGCTTGCAAATTGCGATGCGATCACCTGTTTTTATGTTGGTCAACTTTCCTTCCTTTCTTCGTTTTTCTCGATAGGTATTGTCGACATCATAATGATGTTGTCTAAGCAGATTTTCAATTTCCGAAGCGTTTATTTGTTCTGTTAGATTTTTAAATCTAATGGTTGTCATCACTGAAGTATCACATACGTATTGGTCTATATGAATCGTTTGAGGTAAAGTGTTTTCCATTGAAGAACACACTGCTATATAATCAATTAATTTGCCTCCTGTGGCTTGTTTCATTTCCGGAAACAGTTCT…	0.103696	P16703	RecName: Full=Cysteine synthase B; Short=CSase B; AltName: Full=O-acetylserine (thiol)-lyase B; Short=OAS-TL B; AltName: Full=O-acetylserine sulfhydrylase B
LYa_b1_contig_32160 (191..2092) consensus	-12.124	0	TTAGTTTTATTATGTGTTCAGAGAATAATGGGTTATAAGTTTTAAAATATAATATTGTAACAATAAGTGCTGTCTACATGTTGCTTATTACAGTTTTAAATATAAAAGTTAACAGACAACCGAAGACGAATTTAAAGTCATGACCGTCACTTTCGGTAGCCGTTCAGGTCGAATGCAGCTAATTGTTTAAAACTATAACAAGCAAATATTACAAAATATGCGTGATTAGTTTGATTTGATACATTATGTGCTAAATAAAGCAATTAAATAAAAATAAAGTCACTACTTGTAAGACAAAATCAATAATTCTTGACGAGTTAAGCGTCCGATTTACTTGCCCATTATAGGCTGATTACAATTTGTTATAAGCTAATTCTTTAAAAGATTCTCATATTCATG…	1.723e-26	P46058	RecName: Full=Epidermal differentiation-specific protein
LYa_b1_contig_63212 (1..906) consensus	-11.9286	0	TGAAGATATTGAATCAGATGAGCCAATATCACTTGTTGGGGAGACTTGCATGTGAAAATCAGGATTTTGAGAGTCTTTTGTAGCACTGCTGATGTCATTTGAATTGGTAGTGGATTGATTAGGAGTACATAATATTGGGCCTGGTTGCCCAGAAATAGCAATATCTTGGTTCAATTGCCTGATTTGGTTTGTTGAAGAGGTTGGTTTGTCAAAATGAATTGTTGAACATACAGCAGTTTCATGAGATGACATGTCATGTTGATGCTTGACGTCACCTTCCAAAATTTTCTGTCTGATAGGATAAAGATCATAAGGTAAACCTGAATTCAAAGCTATCATTTCATCTGGAGGAATGATGATTAAATTGATTTGATTGTCTGCAGAACATGCATCTGGTTT…	0	not available	not available
LYa_b1_contig_267812 (1..657) consensus	-11.6686	0	ATATCTGTTTCGTTACCAGTACAAAATACGCCATACAGACCCCTACGATCGTATGACCAATCACGTGACAAATACTTGGCTCTTCCCCACATTCCAAGTCCCAAATTTTTGCAAAGAACGCTAGCATCAATATCGTCCCATTCGAATGAACAAATCGATTCAGTAGTTCCATTTTCGATGTATAAAACTCTACCATCAGAAGAAATGTCTATTGCCACCTTTTGATCATTATTGCACTCAACAGCAGCGTCTTCCATGTTATCACACCCTCCAAACGTAGTATCATATCTGTCCATCATACAATCATTGAAATTCACCTCATTGCCAGTGCAGTACAACCCAAACACTTCCCGGTGGTATGTCCAATCACGTGTTAGGGACTTTGCCTGTCCGGACTTA…	1.613e-12	E1C3U7	RecName: Full=Lysyl oxidase homolog 2; AltName: Full=Lysyl oxidase-like protein 2; Flags: Precursor
LYa_b1_contig_298635 (90..1150) consensus	-11.356	0	GAAGGATTTGATTTATGAGTCTTATTTATAAAATCTTTTAAATCGACGTTTACATTGAATCGTTGTCATTTTATTCATATAGGAAGCTGTAAGGTTTTCAAAGCAATGGGGTACAGCTGCATCCATCAATGGCATATTCTTGTACTGATTATAAAATTCTTGATCAATACGAGTAAGATCACGGAATATACGATGTGCCCAAAAATATCCATGGATATCAGATGGATACGGTTTAGAAGACCATTTTTTTCGAATCTGATTTCTCCACTTAGATATTATGTAAGATGAATTCGTTGTTGCTATGAACCAGCTTGAAATATGTGGCCTCATGCTGTCGGAAACTGCAGAGTCCTTCCTTTCATACACCAAAAAATTAGTTGATTCAGTTGCACTATCGAT…	0.001969	Q5UQW4	RecName: Full=Uncharacterized glycosyltransferase L373
LYa_b1_contig_52844 (37..2335) consensus	-11.1296	0	TGACTTCCCAGCACCAGTTCTGCCAACTATACCAATCTTTTCATTTGGTTGTATTGTACACGTTATTCCCTTCAGCACCAAGTCTAGACCTTCTCTGTATCTTACGCCATAATCTTGGAATTCTATGCATCCTATCTCTGGCCAGCTTGAACTAGGTTCCTTCTCTGGGATTTCCCATGCAGCCTCGGTTGGATTTTCTGTATATTCCTGGATCTTTTCAATCGAAACTGTGTTACTTTCTAAATCAGAAATTACTCTAACAACCCATTGCAAACATCCGGTTATTTCTAAAGCATATGTTATTATAAGTCCAACTATTCCTGCAGACAATGTAGCTTTTCCAAGCACAGCAAATATACACACAAACAATAAAATCAGAGCTCCCATAAACTGAAGTCG…	0	Q6UR05	RecName: Full=Multidrug resistance-associated protein 1; AltName: Full=ATP-binding cassette sub-family C member 1; AltName: Full=Leukotriene C(4) transporter; Short=LTC4 transporter
LYa_b1_contig_393773 (208..2377) consensus	-11.0588	0	TACCGAAGCAACCAGCAGGTCCTAGAACAGTTTTTTTTAGGATGGCATTGCTGTGGTGGTTATTATGCTTGGTGTCGACTGTTTGTGGGCATGGACCCAGTAATTTCATAGGAGATTATGAAACATCAGCCATAATGGAGGCAGTAAATACGGTTGATGGTCATCATCATCAGATGATGGTATTTGGACAACCACGAACAAGGGCTGGGACAATCATCAATGGTAAACGAATGAACGAAGCAATGACCAATCTATATCTGTTCAGTAGACATATGTCCGGTCCAGAATATACAGACACCATGACGAGATCTGCAAAAATTTCTTGTATGGCAACACAAATAATGTTGACAAGAGGTGATGTACCCAATGATGGAGCGTTTCAACAAAAAATGGCACCAT…	9.13e-100	H2A0M7	RecName: Full=Peroxidase-like protein; Flags: Precursor
LYa_b1_contig_453600 (3..244) consensus	-10.9756	0	CCGCCATTTCCATTTCCATTTCCAGCGCCATTCCCATTTCCATTTCCACCGCCATTTCCATTTCCATTTACACCGCCATTTCCATTTCCATTTCCATTGCCATATCCATTTCCATTTTCATTTCCACCCCCATTTCCATTTCCACTGCCATTTCCATTTCCATATACAGCGCCATTTCCATTTCCATTTCCACCGCCATTTCCATTTCCATTTCCAGCGCCATATCCATTTCCATTTACACC	0	not available	not available
LYa_b1_contig_109164 (20..2357) consensus	-10.9653	0	CACGGGTTCAAACTAATAAACAGATTTTAAATAATTGTATGCTCGGGAAGCGATCTCAATTTTTAACGGGGAGTTTCTTGTTAAATAACATTGGAATACATTTTTGTCTTGTTATTGATGAAGGATGAAATGCTTCCTGTAAATTCTGTGTATAAATATGCTAACAAATTGATTATATTTTATCAAATAATTTTACGCGACTCTTATATAAGATATGTAACAAGATGAAACTGATAATGAAACTTTTGCTGCTTCATTGTTTGATTTGCACATTAAAAATACCCTCAAGCCTTTAGTTGTGTTCCAGGCTTTGGCCATATGCACTGATTAAATATATTTAAAAATGTGTATTTTCTTTTTTCGCAACCCTATGACACACAAACATCGTATAAAGGAGCA…	1.90232	F6QEU4	RecName: Full=E3 ubiquitin-protein ligase TRIM71; AltName: Full=Protein lin-41 homolog; AltName: Full=RING-type E3 ubiquitin transferase TRIM71; AltName: Full=Tripartite motif-containing protein 71
LYa_b1_contig_65795 (1..464) consensus	-10.9422	0	TAGAGGTCAGTGTAGGCTGGATTGATGGAGCTCCATTTACACTGCTTGATGCGGGTGTAGTCGGTGTATTTGTAGAGGTCAGTGTAGGCTGGATTGATGGAGCTCCATTTACACTGCTTGATGCGGGTGTAGTTGGTGTATTTGTAGAGGTCAGTGTAGGCTTGATTGACGGAACTCCATTTACACTGCTTGATGCGGGTGTAGTCGGTGTATTTGTAGAGGTCAGTGTAGGCTGAATTGATGGAGCTCCATTTACACTGCTCGATGCGGGTGTAGTCGGTGTATTTTGGATGTGTTGAGTGGTTTGAGGAGGTACAGAAGCACTAACTATAGATGACTGCGTTGTTTGAATGAAAGAAGGTCCGTTTACACTGTTCGATGTAGGTGTAATCGGTGTAT…	7.85469	O42874	RecName: Full=Protein peg1
LYa_b1_contig_60434 (1..413) consensus	-10.7652	0	CACAGCTGCGACTGATAAACATCTTTATGTTTGTCATGCTGAGCTCAACGCCATTGCAAACAAAATACAAGCGGATATACGAAATTGTAAACTGTTCGTGACTCGTTTTCCTTGTAACGAATGCGCTAAATTGATAATACAGTCTGGTATTACGGAGGTGATTTATTATGCATCAAAAACACCAGGTTTAATAACTAGAAAAGACGAACAAGCCACAATTCTAATGTTCAAGCATGCCAATGTTAAATCCAAAAAGTACGAAGGCGACAGGAAAATTGAATTTAAAATTGGGGAAGAAGATTCTATAATTTGGTGAAAAAGTCAATGACATCATCTATAAAACGAAAAGCTTGAGGATGACTGATAGATTTAAGAAAATATAGTGATATTACTTTAATT…	2.201e-20	Q5M9G0	RecName: Full=Deoxycytidylate deaminase; AltName: Full=dCMP deaminase >gi|62286567|sp|Q8K2D6.1|DCTD_MOUSE RecName: Full=Deoxycytidylate deaminase; AltName: Full=dCMP deaminase
LYa_b1_contig_18182 (1..1188) consensus	-10.4694	0	CTATAGACTTTGGTACAACTTATTCTGGTTATGCATTCTCAATGAGACATGAATTTAAAACAGATCCTCTAAAAATACATGCAAATCAAGCTTGGAATTCTGGTGGAAGGGCTCTTCTGTCTCTCAAAACACCAACATGCCTTCTGTTGAACGACAAAAAGGAGCTGGACTCATTTGGATATGAAGCTGAAAACAAGTATGCTGACATTGTGATGGATGATGAACAGGACAACTACTACTACTTTCATCGGTTTAAAATGAATTTACACAATAACAAGAAAATTACAAGTCATATGGTTCTAGAAGATATCAGAGGAAAATCTGTTCCTGCTATAGAGGTGTTTGGTTTGTCAATAAAAGCACTTGTAACTCATCTCACAGATATATTAGATAAACAAG…	1.273e-75	O43301	RecName: Full=Heat shock 70 kDa protein 12A
LYa_b1_contig_33769 (1..315) consensus	-10.2624	0	TCTCGTTGACATAACAATCGAAGGCATCCGTTTCGTTACCCATGCAAAAGACGCCATAGGCATTAGCCCGATTATATGACCAGTCGCGTGGCAGATATTTGGCTCCTCCTGACATTCCAAGCCCAAGATGTCTACACAAAACTCCAGCATCGATATCATCCCATTCGTATGAACAGATTGTTTCAGTAGTTCCATTTTCAGTGTACAAGACCCTTCCATCGGCATTGACAGCCAGTGTACCATTTTTGTCATTCCAAAATTGGTTCATCGGCATTGGATAAGGGTAACAATCAACTGCTGCATCATCCATCTGAT	4.025e-06	Q4G0T1	RecName: Full=Scavenger receptor cysteine-rich domain-containing protein SCART1; Flags: Precursor
LYa_b1_contig_33378 (6..1950) consensus	-10.124	0	GCACTCTTTGCTGTTTTAACAAATTACTTAATGTACAGCATTCCATCAAGTATCCCTGTTACATACAATTATAACTGATATCCAGGGAGAATATACAGTAAAACTTATCTTACTTTATACATAGCCTATACATAGCAGTTTCAAAATAATAAAAAAAAATCCCGTACAAATCCATTCAAATAGGTATAACGAGACATTAGTTGTAAATATATAGGATTTATGTATGTGGATGTCGAAATTTGTCGGTTGGTAGTCACAGCACGAACAACTTTGACTAGTCAGCACTGCGAACTAGACAAACGATTAGAGTGTTGTCAAGTAGCGAACATTTTGTAAACATGTATCCAAATAAATGTTCATATATAGATTAGACATTTGATTTCCCCGTTTGAATGGTTT…	2.915e-37	Q91XQ5	RecName: Full=Carbohydrate sulfotransferase 15; AltName: Full=B-cell RAG-associated gene protein; AltName: Full=N-acetylgalactosamine 4-sulfate 6-O-sulfotransferase; Short=GalNAc4S-6ST
LYa_b1_contig_349639 (591..1357) consensus	-10.0832	0	TCTATATGTTTTGTTTCCACAGCAGAGAGTTCGCTATCAGGAGCTATATACATTTCTCTATTGTCAATGATGTCATCACTATCTGTTAAGCTTTTTGTTATGATATGATGACGACCAGCAGAACGCCTTCTTCTGGATGATGAACATGTTGTATGAAAATTTCCAGCATCCGCTGTTTGCGCTAAGCAACTTTTAAGTGGACCTTCCAAACCACACTTATATGCAAATTCATTTAATGGTGTTCCACTGTCTTCCTCCGTTTCACAAATACAATATTGTTGTAGATTTATTGCTTGACTCAGTGCTATTGGATGGTCTACAAAGAATCTTTCAGCATCACTTACCCTCCAGTTTTCTGCAAACGCTTCCCAATTAGCTGATGTAGTTGCTAAAATGGTC…	0.0001431	F7A4A7	RecName: Full=Otogelin-like protein; Flags: Precursor
LYa_b1_contig_261682 (1..579) consensus	-10.0318	0	TTGCAGAACGTGAAAGATTGTAATATTGTTGGAGATAGTAAATCTATTCAAGTTTATCCTGAAAATGAACAGAGTACAATTGACCTTGAGGGACACATAAGGACTATAAAAAATTCTTCAAACACAACTGAGACTACCAGCTCCTCTAAAGACCAGAACTTATCAAATGTTAAAACTTTGAAAAATAAAACAAATACAGGATCGAAACACGTGAAATCCGAACATCGTCATAGTGGACAGGAGGATACTTCTTTCCAGAAACAAACTTTACAATGGGTCTCGGCAACCAAGGTCCGACAAAGTGGAAGTGAACAAAACATGCTTTCTCAGCCAACCTTTTGATGCATTTACCATAATGTTTCGAGTATGTTTATCCTTTGCTGTTGAATTTTTATGTTA…	3.90786	P75590	RecName: Full=Translation initiation factor IF-2
LYa_b1_contig_13899 (1..1212) consensus	-9.89793	0	TGTGTCCACACTTGTATAAGTTGTCAAATATCCACACTGACCTGTGTCCACACTTGTATTAAGGCAGTAATACAAGTAAATGACAAGTCGAAAATAAAACTTTATTTATTTCAGTTTGATTCAAAAACAAATAAATGTAACAAATCTGTGTCAAAAATAAACCTGTTTATTTTGTATGTTATATTGAATGTTATGAAGGTATGTTTGTCCGAAAACTATTGAAAGAGGAATTATTCTTTAAGTTCAATCTGCAAAACATAGCAATTAAATGTTAATTAGCTTACGGAAGAACAAAATTATAATTTGAACATAGATCTTTGAATCTCATTTTGACAGATCCATTTATACCTTTACCAAAGATGCCAACCCTAGGATAAGGAAAGTTCCCTAAATCCATAT…	1.14275	P65036	RecName: Full=Uncharacterized protein Mb2666c >gi|614094706|sp|P9WL58.1|Y2633_MYCTO RecName: Full=Uncharacterized protein MT2709 >gi|614094711|sp|P9WL59.1|Y2633_MYCTU RecName: Full=Uncharacterized protein Rv2633c
LYa_b1_contig_1153 (269..838) consensus	-9.76598	0	AGGCATCAGTTGTTAATAAAGAGCTGTTGCAAAAATAATGGTTGATTGTATTTTACCAATGAACCTTCAAGAAATATATACAATGTTTTCAATTAGACAATGTTAAAACTGGTGACTTAAGGAAAATACCCATGATGCAACATGCAATCATGAGCACAAAAACTATCAAATAAATCTTTTAGTTAAGCATTTCTATGGATTAGTAATAGAAACAAGACTTGAATATTGTAGAATTTATTTCTTTTATTCAATAAACCAAATTGTCATGTTAAAATCTAAGTTTTATTTTTCTTTCAGAATTTGTTAGCACTGCAAGAAACCTTTTATAAATAGCTGTGTCCATTACCAATGATGTGCCTTGATTTTTGGGTTTCAATATCTTGCAGATTATTTCTTTGT…	0.33209	Q5BK57	RecName: Full=HAUS augmin-like complex subunit 8; AltName: Full=HEC1/NDC80-interacting centrosome-associated protein 1; AltName: Full=Sarcoma antigen NY-SAR-48 homolog
LYa_b1_contig_456560 (1..202) consensus	-9.75321	0	ATTTACACCGCCATTTCCATTTCCATTTACACCGCCATTTCCATTTCCATTTCCACCGCCATTTCCATTTCCATTTACACCGCCATTTCCATTTCCATTTCCATTTCCATTTCCATTTCCAACGCCATTTCCATTTCCATTTCCACCGCCATTTCCATTTCCATTTCCAGCGCCATTTCCATTTCCATTTACACCGCCATTT	0	not available	not available
LYa_b1_contig_423505 (1..226) consensus	-9.66088	0	AAACAATGGCGGGAAACCTGGATAAATTTTAGGTTGTGGTATCTTAGGTTGTTTCAAACTCATAATTTGGTTAAATGTCGTCATGAAATCCGTCATAAATTTATTCCTATTGAATGCATTGTATGACGGCTGGCCAAAGAAAGCGAAATGTTTTGCATTTACGACCTGAATGATCACAATAAGGATAATCCCTTTCAACATTTTGTAACTTGTATATCTTTCTGAA	2.917e-20	P86859	RecName: Full=Mytilin-3; AltName: Full=Mytilus uncharacterized protein 3; Short=MUSP-3; Flags: Precursor
LYa_b1_contig_182914 (10..519) consensus	-9.63266	0	GAGTGTCTTGTATCATATACACGTGGGTTTATATAAAATTACCGCAACTGTTAACAATTTGTTAGTCAAATTTGAAGGCGAAAATGCAAATTTTGTAAAATCAAAACTATAAACAACTCAACAAAGCTGTCCATTACAACAATTACGGAATCGCGAGTCGTAAGCTCTTGTTCCACAGCACGACAATCCACTACCACTATTCAACACTCTCTGACAACAAGTAACAAAACGAGTGTCATATGATCTAGTGCCGCAACAGGATAATCCACTACCATTATTCAACACCCTCTGGCAACATGTAGCGAAACGACTGTCATATGATCTAGTGCCGCAACATGATAATCCACTTCCTGCATGTAAAGCGCCTTCACAACATGTAGCGAAACGTGTATCATACAT…	4.282e-07	D9IQ16	RecName: Full=Galaxin; Flags: Precursor [Acropora millepora]
LYa_b1_contig_455056 (1..302) consensus	-9.41815	0	AAATGGCGCTGGAAATGGAAATGGAAATGGCGGTGGAAATGGAAATGGAAATGGCGGTGGAAATGGAAATGGAAATGGCGGTGTAAATGGAAATGGAAATGGCGGTGGAAATGGAAATGGAAATGGCGGTGGAAATGGAAATGGAAATGGCGATGGAAATGGCGGTGTAAATGGAAATGGATATGGCGCTGGAAATGGAAATGGAAATGGAAATGGAAATGGCAGTGGAAATGGAAATGGGGGTGGAAATGGAAATGGAAATGGATATGGCAATGGAAATGGAAATGGAAATGGCGGTGTAA	0	not available	not available
LYa_b1_contig_103619 (1..901) consensus	-9.25731	0	GATCGCTCTTTTTGAATAAAGTTGAGCTTTTTAAAGATAAAGCTATCATGAATCCAGTTGGTAAATATGAGATCACTAGGTTCATTTCTAGATCTATTGGCACCATAACCATTTAGTAATTGATCAACACAACTGTTCTTCTCTTTAATTCCCATGTACGGTTCATAGCTCATATCAACAACGAATGGTCTACCAAATATCATAGATTGTGCTAGTTTAGAATCCGTTTGATGAACCATGGTTTGTCTTAAGATCTTTAAATGAATAGTATTTCTCTTAATTGGATTATACAATAGATCTCCCATCATAATTTTTTTTTCTGCGTCATGTATCTCCATCTTTTTCTCATTTTCCACTTTCTTCTTTGCTCTTGCTAACTTTGCATTTTCCTTTTTTTGA…	1.248e-10	Q7L0Y3	RecName: Full=tRNA methyltransferase 10 homolog C; AltName: Full=HBV pre-S2 trans-regulated protein 2; AltName: Full=Mitochondrial ribonuclease P protein 1; Short=Mitochondrial RNase P protein 1; AltName: Full=RNA (guanine-9-)-methyltransferase domain-containing protein 1; AltName: Full=Renal carcinoma antigen NY-REN-49; AltName: Full=mRNA methyladenosine-N(1)-methyltransferase; AltName: Full=tRN…
LYa_b1_contig_438735 (1..387) consensus	-9.11511	0	ATTTCCACTGCCACCTCCATTTACAGCACCACCTCCATTTCCATATCCGCTTCCATTTCCATTTACGGCTCCATTTCCATTTCCGCCTCCATTTCGATTTACGGCTCCATTTCCATTTACGACTCCATTTCCATAGCCACCTCCATTTCCATTACCGCCTCCATTTCCATTTCCGCCTCCATTTCCATTTACGGCTCCATTTCCATTTATAGCTCCATTTCCATTTCCACCTCCATTTCCATATCCGCCTCCATTTCCATTGCCACCTCCATTTCCATTTCCGCCTCCATTTCCATTTCCGCCTCCATTTCCATTTACGGCTCCATTTCCATTTATAGCTCCATTTCCATTTACGCCTCCATTTCCATTTACGGCTCCATTTCCATT	0	not available	not available
LYa_b1_contig_31612 (146..1332) consensus	-9.0943	0	CTGTATTTCAATTTAAAGTGGTGTGAAATAATCAGTCGATTGTCTGGCACAAACTGGATTTTGTCTTGTTTTTTGATAAAGACTTTTGTAGAAAGTACGATTTAAAGCACCCCCTCCCCTAATTTTTTCAAGAACGGGTTCATCAAAATTTGCTGCGCCAGTCTCGCGGCTTAATGTTCTATTGAGATTACCACCAGTCCGCTGTTTTTCGAAGCCTCTTATTTTGTGTGTAAGTTCTCGATCATCCTGAATTTCGTCTAGAAAATGTTTGAACATAGGTTTAGTTGTACCAAACTTTTTTGCTTGTTCCCAATCAGTTCTTGATGTGGATGAATGATTTTTTCTGTATATTAATACGCTGCCCTTTGAAGGTGGTTTTGTACCTTCGTCATAGTTTGC…	2.038e-10	Q8T5G8	RecName: Full=Chitin synthase; AltName: Full=Chitin-UDP acetyl-glucosaminyl transferase
LYa_b1_contig_56281 (1..2268) consensus	-9.06243	0	ATACCTTCGTCAACAATCTGTTCACCCTCAAATGGAATACCTTCGTCAACAATCTGTTCATCGTCGAATGGGATGCCTTCGTCAACCATACCACAGCGAATAAAGAACAGCATTGCTCTTTGAAGAGCAAACGAGAAGCTTTTTACTGTCCTTCTCGACATCGATCGCAGTAGGAAAGTACTCCTCTTTCAGAATTTCATTACATTTCGTGCCATCAGGTGACATAACTACAACGTTGTTTGACTTAGTTCCTGTTACATAAAGATTGCCGTCTTTGTCTACGCTAACACCGTTTGGACTTCTGATAACAGATTCGTTTTTGTACATCCAAATTTTATTTCCAGAAAAATTTCGACAGTGTACTTCATTTTTCTCCCACTCAGCAAAGTATATCTTGTT…	0.0124162	Q80VI1	RecName: Full=E3 ubiquitin-protein ligase TRIM56; AltName: Full=RING-type E3 ubiquitin transferase TRIM56; AltName: Full=Tripartite motif-containing protein 56
LYa_b1_contig_33768 (1..2287) consensus	-8.92792	0	TTTGGATAACATGAGACATAGTGTGTGGAGGTATCGATGTTGTCAAAACAGTTGCCTGGCTATTGCTCATTACAGACGATCTTATAATGCTACTGAATGCTGGAGTGGTTGGTGTATGTTGAATAACTTGAGACATAGATTGCAGTGGTACTGCTGATGTTGTAAAAGCAGGTGCCTGACTATTGTGCACCAGAGGAGACCCATTAATGCTGCTAAATGCTCTTGATGTTGGTGTATTTTGGATAACCTGAGACATAGTCTGTGGAGGTACTGATGACGTCAAAACAGGTGCCTGGCTATTTGGTACCAGAGGAGATCCATTAATGCTGCTAAATGCTATTGATGTTGGTGTGCTTTGAATAACCTGAGACACAGTCTGTGAAGGTACTGATGACGTCA…	1.25493	P23253	RecName: Full=Sialidase; AltName: Full=Major surface antigen; AltName: Full=Neuraminidase; Short=NA
LYa_b1_contig_60040 (119..2682) consensus	-8.91914	0	TACAAGAACCGGTACACAATGTTATATCATCAATTGCAATATCACCGATATTACCAGCTTTTCCTTTCGAAGCCTCGATATCAATAACAATGCCTGACTGTATATTACCAGTAATATTCACACAAGCTTTTATCCATTGATTTCCTTGATTTCCGGACCGAGTCCAATTATTAGACCACCAGCCCGAGTTGCTTGTTTGTGAGTACACTGTTAGATATCCGATATGTTGGCCATACATGTGATAATAAAAACTGAGGCAAAACGAAGAAGAGAAAAGGTTTGTATTCTTTGTGCTCAAAAATGCCACAAAGTCCTGTCCTTGACCATTTACCTCAATATAGGCATATTGGTTACCACTATGTGCAGCCGAAGGACCAGTGTTTGTGGTAGATGTTGATC…	1.346e-28	P98068	RecName: Full=Protein SpAN; Flags: Precursor
LYa_b1_contig_452629 (1..400) consensus	-8.73525	0	CCATTTCCATTTCCATTTCCATTTCCATTTCCATTTCCACCGCCATTTCCATTTCCATTTCCACCGCCATTTCCATTTCCATTTACACCGCCATTTCCATTTCCATTTCCATTTCCATTTCCACCGCCATTTCCATATCCATTTCCACCGCCATTTCCATTTCCATTTCCATTTACAACCCCATTTCCATTTCCACCGCCATTTCCATTTCCATTTCCATTTCCATTTCCATTTCCATTTCCATTTACAACCCCATTTCCATTTCCACCGCCATTTCCATTTCCATTTCCATTTCCATTTCCATTTCCATTTCCATTTCCAACCCCATTTCCATTTCCACCGCCATTTCCATTTCCATTTCCATTTCCATTTCCATTTCCATTTCCACCGCCATTTCCAT	0	not available	not available
LYa_b1_contig_86515 (486..720) consensus	-8.72498	0	ATTTTATAATTTAATGTAATCTCTACCACGATTTTTAACTCTATAAAATAACTCTCTTTCATTCGGGAAAATTAAATACTTAAATTTATCTTGAAAAACCCTTATGCAAAAGGTACTAAACTTCATTTATACTAACCTTGCTTAAACCCACTTTTTACAAAACATTTAGGGGTATCTTTTGTAGCTAATGCTTTATAAAAAGCCTGAATAAAAGGTATCTAGAACTGACAATTCT	6.31303	P29704	RecName: Full=Squalene synthase; Short=SQS; Short=SS; AltName: Full=FPP:FPP farnesyltransferase; AltName: Full=Farnesyl-diphosphate farnesyltransferase
LYa_b1_contig_359385 (1..377) consensus	-8.60934	0	GCACATTCATTTGCTAAATAACTACAAATCTTGTTTAGTATGAACTTCCTTTTTTGCCGCCATATCCAGATCCACCTCCATATCCAGATCCGCCTCCATATCCAGATCCACCTCCATACCCAGATCCACCTCCATATCCAGATCCACTTCCATATTCAGATCCGCCTCCATAACCAAATCCTCCACGAAATCCAGATCCTCCACCAGCTCCAGATCCAACAACAATAACAGTACCACCACCGATACCAGCACCGCCGCCGAATCCAGCACCACCTCCTCCTCCGTAACTACGGTTAGTTACACTTCCTGGTAACACCTTACAGCATGTAGTCCATTTCCCTGGGAATAAGGGTGTTAGTCTGCAATACTTGTCCAAA	0	not available	not available
LYa_b1_contig_4610 (1035..2927) consensus	-8.55299	0	ATATTGAGTGTCCTGTTTCTGTCGTCGTCATTAATAAGGCGGCAAGTCAAACTTCAGAGCTTCCTTATACACGTACCATAGAATTTGCAACAAAAGACTACAAGATTCGTCTTCTTCCGGACAAAGTGGTTTTGGTTAATGGTACCAAGGTCAGTTTACCATACAATACGAAAGACAATTCAGTTAATTTATTTGTAAGTGGACGTTATGTACGGGTACAAACCAACTGTGACGTTATTTTAGAATGGGATGGGTCAAAGAATCTTGAACTTGCAGCACTTGACACCTTTGCAAAACACATGACAGGTATATGTGGAGACTGTGATGGAATCAGAAATGAATTTAATGCAAATAACGACAGTACCCCTACAGATGACCAGATACAAATCGGAAGGATAG…	7.456e-60	P06867	RecName: Full=Plasminogen; Contains: RecName: Full=Plasmin heavy chain A; Contains: RecName: Full=Activation peptide; Contains: RecName: Full=Plasmin heavy chain A, short form; Contains: RecName: Full=Plasmin light chain B; Flags: Precursor
LYa_b1_contig_37066 (97..1237) consensus	-8.34037	0	CAAGGATTTGTATAGTAAGACAAATCCTTGGTTTATACACCTTTAGAAATTAATCGCTGTATGGTCTGAATCAGACGTTGGTAATGCATGGCATTACCAGCAGAAAGTTGACCAGATTCAAATATTTCCCATTTGCCTTGAGCGTTTCTTGACATTGAACACATTATTACGGCCTGTGAGTTTCTTGCATGATTGAACGTAGTCTTGCAAAGATCTTTTCCGGGTTTTGAAGCATCATAAAATTTTAGACTTGGATTTGGATACTGAGCGATATTCGGAGAACTCCAAGCGCTCAATGTGAAAAACAAATGTGTGATATTTGATGGAATTTTCTGCAGTGAAACATTAATTGTATGATGGCCAATTCGTCGTCTACTATCCATCATGTCTCCGGAATGA…	2.904e-06	Q52353	RecName: Full=Tellurium resistance protein TerZ
LYa_b1_contig_69061 (593..2168) consensus	-8.08407	0	GCCTGGACGTAGTGATTTACGATGTGAGGCAATGCATTCAAATTCCAGCTAAGCATTCCAAATAAAGACATCGCCACAAAAGCTTTTTCAGCAGTCAGCACATTCTCAGGGTCGATCAAAACATACATGGCAAATGTCCCCAATGAAACCAAAAATGGCGTCAAACACCATGCCAAATGCATACAAGTACCAACAAGTGCTTGGTTTCTGATGACACCCATTTCTTTGTCACGTATCGTTGATATTTGTTTCTCAAAAGAATCCTCCCAGGCATAAAGTTTCAATACCTTAATACCATTCAAAACTTCATTCATCATTTTAACTCTGTTGTCTTTCAAATCCATAACCTCTAAATGCAAATCTTTTCCTTTTTTAACCAAATACGAGTTGAATGGAATG…	1.291e-77	Q864R9	RecName: Full=Multidrug resistance-associated protein 1; AltName: Full=ATP-binding cassette sub-family C member 1; AltName: Full=Leukotriene C(4) transporter; Short=LTC4 transporter
LYa_b1_contig_30565 (540..2808) consensus	-8.01159	0	TGACATTATTATAAGTAAATATTGAAATATGTTTTGAAAATTGTCCTATTGTGAATCAAATTTAGGTTCATAATTCTTAAAAGAAAATTAATACAAAGTCAATAATACATAGCTGAATTGGTAGTAGAACTAGTTGTAATCACTGGAAATAATTGTCAACTTGAATCCATCTATTACATCACCTCTCAGGTATGCATTATTTATGTCCCATCAATAGGCAAAAACATGAATATGCAAATGTATTTAGAGGAAATACTTGAACAAAAAAGAAGGTTCACATTTTTCATTGTCCTTTTTTGCTATACAAATACACTGTGTCTTAACTACCCTGATCTAGATTAACAAACACATAAGTAAACAGACAGGTCTAAATGATGAACTGTGTAAACCATGCTCCGA…	1.575e-40	O16025	RecName: Full=Allene oxide synthase-lipoxygenase protein; Includes: RecName: Full=Allene oxide synthase; AltName: Full=Hydroperoxidehydrase; Includes: RecName: Full=Arachidonate 8-lipoxygenase
LYa_b1_contig_193179 (1..400) consensus	-7.90571	0	AGGGTAATAAGGCACTTAGATGGATGTTTCTATGGGGAGATATATTATTCTTTTCTGAATTCCATTCAAATAAAAGGGGTTATGGGTAGAAGGCACTGCTATAAATCTTCATGCATACAATTTTAATGAATAATTCTTTGAATGGGTAATTCTTGTTAATGCTGTCTTTCAAAAAGTAAAATTTTGATAAAAGTGCCTCTTGACCCCCTATAAAATACCTTCAAGAAGATAAAGAAATATGTTATTTAAAATATGAAAATTATGATCTCATACAACATTGTACAAGGGTCTTACCATATATTAATGGAACATTCCTACATAAAAGGAAAACAAATGATGCAAAAATAAAATAATATATTTATGTAAAATAATATTTCTGGTAAATCATAGTCTCAAATTG	9.04178	E9PTA2	RecName: Full=Transient receptor potential cation channel subfamily M member 2
LYa_b1_contig_326162 (5..442) consensus	-7.77152	0	GGTATTTATGGTTTTTAGCATTATGGCCACATCATTGTTCGTACCCATTATTATTGGTGCAGCAACAGCTAACTATATACTGCGTGATAGCCACAGGGAATTGCTTGTCATAACTGGCCTTATATGCCTTCTAGAATTCCTTGTGTCCTTTGCTGCGTCACTTTATTGCTGTGCATCACCATGGGCTCCATGTAAACTAGCGAAGAAAGACAGAGAACTTAGACGTGAGCAATTCGTTGACAACGAGAAGCAAATGACAAAGCTAGAACTTCCAGAATATAAACCATAACCAGCTATCTCCAATGAACTATACCATGACTGCAAAACCCACCATGATCTTTTATTACCCAAAACACTGCTTTTGTATTGCTTAGTTTACTATTCTATTCTGTCTAAAAG…	2.87895	P09870	RecName: Full=Clostripain; AltName: Full=Clostridiopeptidase B; Contains: RecName: Full=Clostripain light chain; Contains: RecName: Full=Clostripain heavy chain; Flags: Precursor
LYa_b1_contig_8154 (1004..2827) consensus	-7.66533	0	ATTCTTCTAGAATAGATTTTGTATAAACATTTATAAACTTCATAGAAAGGAATACACAGACATGTGAGAACTTGCATTAACATGCTGAAATAAGAAGACAGGATGACATAGCAATGAATCCTAGAGAATCAGTGTGTTTTATGGCATGTCTGCAGAATGATAACATAAATGTCATAAAGCAAACATTAAGGTCCTTGATTTTCCATACATTTATTAGTTGGTGTGACTGCATATGAAGATAAGGAATATCATTGTTCTAGTCCACTGCCCTTGATAGCAAAACTTCATTGAGAATAACAGACATAAAAATATGATTTAATAACTCTACAGATGTTTCATTCAAAAGGCTTAGTCAGGAGTGATGCGAAATAAGTTAATTCATCACAAGGCATGTGACTT…	4.41818	O13642	RecName: Full=Lipoyl synthase, mitochondrial; AltName: Full=Lipoate synthase; Short=LS; Short=Lip-syn; AltName: Full=Lipoic acid synthase
LYa_b1_contig_425468 (1..422) consensus	-7.57755	0	AAAATCAATATCAATGATAAAAAAAAATACATATACAAATGGAAAATAAATCAAAGTTGCAGTAAGAAGTCTGGTTATAAACTGTTAAGGTAAAACATTTCTTCCTATTAAAACAAATAAAGAATAATACCCATGGTTATAAATACTAGATGTATATGTCCCGATATCATCCCGAACCTCTCAAGTCAGACCAAGGCGTGGCTGCTGAGGTCTAAAATGGGAATGAGTATATGAATAATGTTCTAATTTTTCGACGAAATATTACTATTCATCATACATTACTTATTCTGTTTTTGTGTAAATGAAGATGATTCTCCCTTTAACATTTTTCAAGTCTTTTATAGAAGTATTGATAGTTTTTAAAGTTTAAAACAACACGCTCGTATTTAAGTTTTACTT…	0.523976	A4IIE8	RecName: Full=Rab11 family-interacting protein 4; Short=FIP4-Rab11; Short=Rab11-FIP4
LYa_b1_contig_68234 (1..451) consensus	-7.42336	0	TAAGTGTTTCAATATGCGTACTTAAGGATGTTCGCTACTCTGTTAAAAAATAACAAGCTTTTTAACAGACTATTATGAATTGATAGTATATAAATAATGACCAAGCTCAAAAAGCACTTTATGCTCTTTACAAGAAGATACAAAATATCTCACTCCCGATTGATTTACAGTTAAAATTATTTGATGCATTGGTGGTTCCTATTTTGACCTATTCCACGGAAATATGGGGGTTTGAAAATAAAAATAATATTGAAAAATTACATTTACAGTTTTGTAAGCGCATTTTGGGGGTGCGATCCTCTACGCCAAGTTTTATGGTGTATGGAGAACTTGGAAGATTTCCACTTGAACTGCAGATCAAGTTAAAAATGGTATGTTTTTGGCACAAGCTTGCAACAA…	0.0570039	Q10126	PUTATIVE PSEUDOGENE: RecName: Full=Putative uncharacterized transposon-derived protein F52C9.6
LYa_b1_contig_31150 (1..362) consensus	-7.37169	0	GGCTTAAATATATTGTGTAACACCACTTAATAATGTCATGTTAAGCATTCTTAGAATGCAGATCTTTGTCATTAAAATGCTTTACTTCCAGGACGTAACCATGAATCATCTTGGAGTGTCTGGCCGGACGGAGGTCTGTTATATCTTTGTTTTGCCATAAATCTGTCTAAGATATCGTCAGGATCAGCTATCGAAACATCATCAGTGTTCATCTGATGTAATCTCCGTAACCTAGCATCATTTTTCTTCTGTATCCTGTCAACATCTAAACTTGTTGTAGATCCCATAGGATTTAATGATATGCTTTCAGGCCTTGGGCTGAGAGGAAGTCTTTCTCTTCTTCTCATTCTTGCTGAGTCATT	0.002029	Q1MSJ5	RecName: Full=Centrosome and spindle pole-associated protein 1
LYa_b1_contig_3665 (339..1078) consensus	-7.33344	0	GGAATGCCTGGCGATACTGCTAGAAGGTGGGCGCCAATGTCCGGGCGATATGCTACTCGTGTTGTCGCCAACATGGGTTGTGAAGGAGAAATCTAATAAAGGTGAAGGTCTGCATTCGCTGTTGGTCAAGAAAGCAATCGTATTTGATCGGTCCGGAACAACCTATGTCGATGTCTTTCCGACCCCTAGACGGTGTTCCTATTTTGTAAATTTCTTCACAAAGGCGATCACCGATGGCCAAAGAAATGATGGTGTGGAACTTGAGCAGGACTTGGACTGTCCAATGTCAAGTTCTGTTGAGCTGTGCAAGTATGTAGACGATAAACTACTGTCACGTATATGGATGGCGGAAGCGGGAGTAAATTACCCAGAAACCCTAGCTATTGCATACAAACCATC…	2.737e-24	A5YM72	RecName: Full=Carnosine synthase 1; AltName: Full=ATP-grasp domain-containing protein 1
LYa_b1_contig_425252 (3..622) consensus	-7.18594	0	TTTTTTTTGGTTTTGATCTGCTATTTATTTTTAAACGTTCTCAATGCATGATATTAAAAGCGGAAGTATTTGGTGTTGTCGCATAACGCTTGCTGAATGTTGTACTTGGCACGCAATTATTTCTTTTGGCATCTCTTGTAAGCGCATTTATAACCATTACAGCAGTCATTGTTTCCTTTACATGTCCTTCCTCGACATTGCTTGCAGGATCCGTAAATACAGCCCCAATTAGTACAGCATTGACGATTGTTTCTGCATGATCTTTTACAACTTTGAGGCCTGCATCTCCCTTTAACACAGTTAAAGTTACTACAACATTTTGTATACTGGCAGTTATCTCCATTGCTCCCGCATGGTGCAGCTCGTTTCACAAGGTTGCGGGTCAGTTCATTTTCCTCC…	1.35396	Q7Z090	RecName: Full=Iota-conotoxin-like R11.3; Flags: Precursor
LYa_b1_contig_264396 (1..211) consensus	-7.1461	0	CTCCATTTCCATATCCGCCTCCATTTCCATTTACGGCTCCATTTCCATTTACGGCTCCATTTCCATTTACGGCTCCATTTCCATTTACGGCTCCATTTCCATTTACGGCTCCATTTCCATTGCCACCTCCATTTCCATATCCGCCTCCATTTCCATTTACGGCTCCATTTCCATTTACGGCTCCATTTCCATTTACGGCTCCATTTCCATT	0	not available	not available
LYa_b1_contig_61840 (1..1522) consensus	-7.12681	0	AAGCCATTGTAGCTTAGTATTTTTTGTAATAGCAAATGGTAGTTGAAAAATCTTTTTCCAGTTTTGATTTTCTAAAACTAAAATTGCTTCCCATCTTTTTACTCCTGTAGGAACAGTGTTGTTTAGCACCATATACATATCTTTAGATCCCTTTTTGCTTTTGAGAATGGTCTTTATAACTGATGGCATGAAAGGAGATACTAATTTATAATCTCCCCTATTAATTTTTTTGGAAGTCTTAGTTAGCATAGAAGTTATGCTATTATATTTCATGATGTCTATATCCATCTGAAATTGAAAAAATTCAGAAAGGTACCATTCTCCCCAACAATATCATTTACATGTAGAATACCCTTACTATGCCAGTCTTTGAAAAACACTGGTTTGTTGTCAATTTGG…	6.17173	A1L0T0	RecName: Full=Acetolactate synthase-like protein; AltName: Full=IlvB-like protein
LYa_b1_contig_224395 (15..702) consensus	-6.77878	0	TGGTGGCAGAGGGTTTGGATTAGGTGGTGTTGGTGGAGTTTTTATATTAGGTGGAGGAGGAGGTGGTGGAAAAGGAGGATATGGGTCAGGATATGGTGGTGGAAGCGGCGGAGGTTATAGTGTTGGGTATGGCGGCGGTGGTGGGGGAGGATTTGGATCTGGTATTGGTGGTGGTGGACTATTGGTATTAAGTGGAGGAGGAGGAGGAGGAGGAGGTGGCGGAGGAAAAAAAGGTGGTCAAGTATGGTGTACCTGTCGTAAAGGACAATGTCTTAAAGGAGAATTTGTTTTGGACAAGTATTGCAGACTGACACCCTTATTCCCAGGGAAGTGGACTACATGTTGTAAGGTGTTACCAGGAAGTGTAACTAGCCGTAGTTATGGTGGAGGTGGTGGAGC…	0	not available	not available
LYa_b1_contig_114642 (45..861) consensus	-6.75557	0	AACTTTTCCTTTTAGCAATTTGGGCTGGTCGTTTTCCTGGACCATTCAATTTAAGCATGTCACATATTGTTGCGGCTAAGGGACCACAATCCTCCCAAAAGGTAACGCATCCATCGACATCTATTCCTTCGTCTTTAAGAATTTTAATAATGGCTGTAGCATGTTCTTCGTCTTGTTTATGGTCGAGAAAATTGTACTGAATGAATTTTGTGCACCTTGATGCACCAAAGCATGACTGATTCGGTTCAACAAGAACAACATTAATACCAAATGATTTATAGCTTTCCCATATAAACTTTTTGCTGAAACCTCCAGCTCCGACTACAACGACCGTTTTGTCTTGCATGGCAAATAGCTGTGAACGTCTTATCATGGTCTCCACTAGTGGTTTCACTGCTT…	2.353e-46	A5YM72	RecName: Full=Carnosine synthase 1; AltName: Full=ATP-grasp domain-containing protein 1
LYa_b1_contig_352074 (1..948) consensus	-6.73085	0	TTTTAAGCCCTCTGTTAATCTGAGGTTGGTGATGAACAGTCTATCTTCAGAAATCATGTCGCCGATTTCAGCTTTCATTATCTGTTTTAATCGATTTTCATCAATAGTCATCGTTTTCTCTAATAAATCTTTGCTGACCACTCGCTCTATTAATGACCAGTTGCACTGGTTCAGTCTCTGCTGAGCGAAATGCATATCATTGTCCCAGTGGTCCATGCCTGCTGGTCTTTTGAAATACAGTCTGTAAGCTTTATTCATTTTGGCAAATGAAGGCCACCTCTCTGGAGATCTCATTTTAAGGATTGCTGCAGATACGGTCATTTTAATTTCAGGAAAAACCAGATTTGTCAAATAATAGTACCACGAAAATTCTTCTTTTGGCAATTTTGTAATCATAAC…	1.367e-05	O16025	RecName: Full=Allene oxide synthase-lipoxygenase protein; Includes: RecName: Full=Allene oxide synthase; AltName: Full=Hydroperoxidehydrase; Includes: RecName: Full=Arachidonate 8-lipoxygenase
LYa_b1_contig_62441 (1..442) consensus	-6.72981	0	TTGGGAGGATTGTGGTCCCTTAGCCGCAACAATATGTGACATGCTTAAATTGAATGGTCCAGGAAAACGACCAGCCCAAATTGCTAAAAGGAAAAGTTGGACACAAAACGTGTTACGGTCAAGAACCGGCGATATACCTCATTTCCCGAGATCTCATCTGTATTCCAGTATCTGCTGTTCTATCAAAAGTGAAGAAGACGTCGACAAGGCTTTGGAAAAGATTAGACTACCTGCTGTATTAAAATTGGAATATGGATCAAGTGGCGTTGGGGTCAAACCTGTCGCAGACCGTGTTGAGTGTATTAATATATGGCAACAATTATCATCAATTCTCCAGAACGACGAAGATCACCCTGGTGTTGGGCTCGGTCACGGTAACGACATTATGCTGATGGAGAG…	3.42e-33	A5YM72	RecName: Full=Carnosine synthase 1; AltName: Full=ATP-grasp domain-containing protein 1
LYa_b1_contig_85270 (2..2461) consensus	-6.69606	0	GTACAATAGAAACCAAGTGAGGATGTGGGCTCTCTGATGCAACAGATAATGAAAATAGTTCATTGTCGAAGTCATTTCCTAATAAGTACCGTGATATATTCTTACAGGTTTGTGGTAGTTTTGACTCATCTACAATTCTACAAATTGCAGTTGTCATTCTGTGTTCTTGGTCAGTAAGTTCCTTCAAACATTTTTGCATATAAAATCGTTTGGATAATATTCCAAGGAATGTTGTAACAACTGTTCTTTCATTCTCTAATAGATCATGCAATTTGTTTTCTTTTTCCAAAACTGAATCGATTTGTTGCATTAGTTTGTTTGCCAATTCAAAATCAATGTGTGCAGCCAGCGGATTCAGTACAACAGACGATTCAATATAATTCATATTCCAATCAATAC…	2.98233	Q9C9G7	RecName: Full=Transcription factor MYB62; AltName: Full=Myb-related protein 62; Short=AtMYB62
LYa_b1_contig_91647 (36..856) consensus	-6.60947	0	GTCCAACTTTTCCTTTTAGCAATTTGGGCTGGTTGTTTTCCTGGACCATTCAATTTAAGCATGTCACATATTGTTGCGGCTAAGGGACCACAATCCTCCCAAAAGGTAACGCACCCATCGACATCTATTCCTTTGTCTTTAAGAATTTTAATAATGGCTGTAGCATGTTCTTCGTCTTGTTTATGGTCGAGAAAATCGTACTGAATGAATTTTGTGCACCTCGATGCACCAAAGCATGACTGATTCGGTTCAACAAGAACAACATTAATACCAAATGATTTATAGCTTTCCCATATAAACTTCTTGCTGAAACCTCCAGCTCCGACTACAACGACAGTTTTGTCTTGCATGGCAAACAGCTGTGAACGTCTTATCATGGTCTCAACTAGTGGTTTCACT…	3.751e-48	A5YM72	RecName: Full=Carnosine synthase 1; AltName: Full=ATP-grasp domain-containing protein 1
LYa_b1_contig_255149 (1..1292) consensus	-6.51982	0	AGATAGGGAAAGCATCACCAAACGCTCCCTCTGCCAAGCCGGACTTCTTAGCCATTAAATCAGCAATTAGTATGCCTTCCATTGCATTAGTATGTGGTGCTGCTGCACGTGAGACACAAACACCTCTGTAATTGTCACAATATTTATCTTTACTTCCGTGGCAGACTGGACATTGGGACAATGGTTGATATTGGACTTGGAGGGCTAATTTGTGGGACTGTCCATAGCGGTTAATAAAGCCATTAATTTTGGACAAATCGCCTGGAGATTGACCCTTCTGGCCAGTCTTGACAAAATCTGTAGCCGGGTCGATACCAGCTTTTACTTGCTGCCTTCGGAATATCTCGTAGACATTATCAATCATTGAATGAAGACAAAAGAATACTGGATCGTAGGCAC…	7.036e-34	H2A0L0	RecName: Full=Tyrosinase-like protein 1; AltName: Full=Tyrosinase 1; Flags: Precursor [Pinctada margaritifera]
LYa_b1_contig_271680 (1759..2545) consensus	-6.23976	0	GAACCTCCAGAACCTCCTAGCCAATTCCACCATCCAGCACCTCCACCTCCGCCTGAAGCGGCTGCTGCGGCTGCAGCGGCTGCTGCAGCTGCTGCTCCTCCAGCTCCTGATCCTGCTCCAGCACCAGCACCAGCTCCAGCTCCAGCTCCTGCTCCTGCTCCTGCTCCAGCACTTGCACTTGCACTTGCACTGGCGAATGCACTGACCAATTGTGATCCAAGATTTACTAATACTGAGAGAAGTCCTTTGAGATCGTCATCATCATCATCACCTCCGTCACTACTATCACTGCTTCCACCACTACTGTCTGAGCCATCACTTCCGTTACTGTCTGATGAGCCATTGCTATCGGAACTATCATCGCTGCTGTCAGAACTGTCAGAACTGTCTGAACTGTCT…	0	not available	not available
LYa_b1_contig_21208 (22..293) consensus	-6.03892	0	GGAGGATTAGGCGGTGGATTAGGCGGAGGATTAGGCGGAGGATTAGGCGGTGGATATGGCGGAGGATATGGCGGAGGAAAAAAGTCATATTAATCTGAATGATGTACAGAAAAAAAAATGAGAAACAATACTACATTGCATAGGATGGAATAAGAATTTGCAATTAAAATATATTTGTTTACATTACTATTTTTTGTGTTCATTTCACTTCTACGATACATTAAAAAACATTTTTAGCAACTGTTCATCTTTCATCAATAAAGTGGTAGGCC	6.80616	Q9UN88	RecName: Full=Gamma-aminobutyric acid receptor subunit theta; AltName: Full=GABA(A) receptor subunit theta; Flags: Precursor
LYa_b1_contig_62440 (1..590) consensus	-5.65761	0	TGATCAGTTTAGCTTTGGCTGTTTCTAAGTTCTTGTCCATGACAGCAATGTTTGCAAATGGTTCCTCATCATTTTCACTACCACATTCGTCTAATGACGGCTCCATCTGGTTATATCTGACAATATTTCCAGAAACCAACGCATTTAAGAATTTCAAACTGTTTGGATTTTTTAATTGTTGTTTGTGTACGGACGACAGACACATCATTCCCATCAGAGTGCATTTAGGTTGCACATTTGAGATTACTGGTCTGATACCCAAAGAAACCATGAAAGCGTAGAGTAAAAGATCATGCCCGTAGCAAGTCTTGATCCAGTCCCGGAGATAGAAACCTCCCATTCTAGCATTGATCTCAATTAACTTTGGTCCTGTTTTTGTCATTTTCATTTCAACGTTGA…	3.032e-50	A5YM72	RecName: Full=Carnosine synthase 1; AltName: Full=ATP-grasp domain-containing protein 1
LYa_b1_contig_309091 (1..433) consensus	-5.58849	0	TTTTAAAAAGACAAATACAATATAAACTTCAATTGTTACTGTCTGCCTAGGTCGCTGCAGGTTACAAGCACAAAAACCAATCTTTGTCTCATACATGTTAAAATCGACATGGACAAGGACCAAAGCAACCCAAATATTGCATAGGAGTACTGCATCTTAAGAAACATATATTTAGGAAAGTCACACCAGACCTTGAACAAACTGGATCTTCTATTGTTGGATTACAACCACACATTGGGAACGCACATTATCTGTGGCTATGACAAGAAATACCAGCATCAATAATGCGAACTTCATTTTAATTTCCTTTATCTGCGTCAGTAAAACTGTAGTTCCTTTCCGGAGAAACTGAGATAATCCCCGGTGTTTTGGTCGGGTTCTTGTTACTGATTCTTATTC…	1.70475	Q9NPD5	RecName: Full=Solute carrier organic anion transporter family member 1B3; AltName: Full=Liver-specific organic anion transporter 2; Short=LST-2; AltName: Full=Organic anion transporter 8; AltName: Full=Organic anion-transporting polypeptide 8; Short=OATP-8; AltName: Full=Solute carrier family 21 member 8
LYa_b1_contig_20898 (9..781) consensus	-5.58105	0	AAAAAAATGTATTTAAGGATGTTTGCTCCTCCATTTTTTGACTTTTTGCCAAATTTCCGGAATCCTCTGGTTTTATCCATGTATTGTCATCAAAACATTTTGCCCACTAATCCCTACTTTTCTTTTTATAATTTTATTACATAAAGTTTAAAAAGCCATATTTTAAAATTTTATGAAATTTTTGTTATTTTTTCATAGTGTTAGAAACAAATAAGGTGCCAATGTGAAATATATGGAAAATCTAGAGAGAATAATTTCCCGCTAAATTTTCAATGGCTTATATCTCTAAAACGAGCACACGGACCCTCCATTTTTTTCTACTTTTTTAGTTTCATAGTTTCATAGTTTATTAAAGAAAACTCAGCCGCAGAAGACTGCGTAACAGGAGCATATTATGCA…	4.20786	Q92H19	RecName: Full=Isoleucine--tRNA ligase; AltName: Full=Isoleucyl-tRNA synthetase; Short=IleRS
LYa_b1_contig_411195 (1..269) consensus	-5.51083	0	GGAGTTGATGGTGTTCATTCTAATTATAATTACAGATATTGTATGTTCTCAACAATCATGTATATGCATACAGGTTTTTGATCCAGTGTGTTCTATATTCGGTGAGACGTTCAGTAATGAGTGTTTTTTGAATTGTGCTGGTCAAATACTTGCGTGCCGTAGGGAATGTCCATGTTAGTTTTAACAACAAAAAGACAAGGCATGTCCAGCTCCAAATGACACTGAAACATATATGAAAGAAATTAAAAAAATAAAAATAAAAACTGTTT	1.383e-05	P86987	RecName: Full=Insoluble matrix shell protein 6; Short=IMSP6; Flags: Precursor [Ruditapes philippinarum]
LYa_b1_contig_102932 (26..1631) consensus	-5.45688	0	GTGACGCATAGACCAAAATAAATAATAAACCAAACAAGTACAAATTTAAGTTGAAAAGTATTGAGGACCCTGAAAATCCCGAAGTTGTGCCAAATAAGGCTGAGGTAATCTATGCCCGAGATGAGAAAATCCTTAGTATTTCGTAGAATTCATATAAACGTCTACTATATCAAATATATTTATGTAGTTCGAAATGTATATACAAAAATTGTAAGTAAATTAGATTGCAATCGTAATCTTTGGGCCAGGACATATTTGTTTCCCTCGCTACACAAACAAAGTAGATACTATGGATTCATTATTATTCGTGGGATACCACTTTTCGTTGATTTCGTTAGTACAGGTGAACCACGAAATTAAAAATTCAACGAAAAAAAAATGATTCCACTAAATTGTTAG…	6.555e-45	Q9JLB5	RecName: Full=Neuronal acetylcholine receptor subunit alpha-10; AltName: Full=Nicotinic acetylcholine receptor subunit alpha-10; Short=NACHR alpha-10; Flags: Precursor
LYa_b1_contig_18885 (1..2418) consensus	-5.45045	0	GAACGTATCCCGGAAGGTAAATCTAGATGTAGTGAACACAAAGAAGAATTATCTTTTATGTGTAATACGTGCAATGTCCTTGTATGTGCCAGTTGTGTTACAGGAAAACACAATGGTCATAACTTTTCAAAATTGGTAGATGTAATTGCACAGTTGCGAGACGAAAACCAGACGCTAATTCAAGGTAAGACCAATGAAGAAATTACAAATACGAGGAAGATTGAGGAAAGCTTGAAATCGTTTGATCAAGCTGTTGAGTCTGTTATCAAAGCCATCACTGACGAGGGCAGTGAGATTAAACGAATGCTTGACAAAACCGTAGCTCAGATGATTGCTTCAGTGAAAGAACAATCCCAGACGGAGAAAGACAAGCTGATAAATATGTTATCTGATGCTAAA…	6.824e-08	Q1PRL4	RecName: Full=E3 ubiquitin-protein ligase TRIM71; AltName: Full=Protein lin-41 homolog; AltName: Full=RING-type E3 ubiquitin transferase TRIM71; AltName: Full=Tripartite motif-containing protein 71
LYa_b1_contig_19884 (1..301) consensus	-5.42227	0	TTTTCTCTTAATAGTTGGAAGCATAACTCCTTTATTTCGCTTTCTGGAATGCTTTTTCCTGGTAATCCTGGCATGCCTGGCATACCATTTTGACCCCTTAATCCTGTAGGTCCATTTTGACCGGGTGGTCCAGAAAGACCAGGTACACCCGGAGCTCCCTGTCCTCCCGCTGGTCCACGGCTTCCTCCTGGACCTCTCACACCTGGCACACCTGGAGCTCCGGCTTGACCAGATGGACCAGGAGGTCCTAGTGGTCCACGGAACCCGACATCTTTATCCGCATGACTAATAAAAGCAGTCC	0.0175218	P32017	RecName: Full=Collagen alpha-3(IX) chain; Flags: Precursor
LYa_b1_contig_52682 (1..443) consensus	-5.31879	0	ACAATTATATGTACACATGTTCTCGGTGAGTTATTACGAATTTGCATATTATAACCGTTTACTCTCCGCTATCTGATCACGGTTTAACTTCATGGACGTGTAATCCAGTGTGACCCTCATGTTTAGCACCACCTTCTTGAGCATCAATGTTTAAACTGTGTAGGTGATGGTGAGTTGGATCTGCAAGTACTATGACACAACACGCAACCTTAGGTCCAGCATTACCTCCCTTTAAACTTCCAGCATCACCTCCCAATCCTAAGTCATCAGGTCCTTCATGAATCGCAATACTTCTACCAATCAGAGAATTTTCCCCATGAAGGCTGATCGTCTCATCTGTCATTTTATAGTCAATATTTCCATTCATATCACAGTCAATATTACCAAGGTCGCCTACAT…	1.704e-12	P28758	RecName: Full=Superoxide dismutase [Cu-Zn]
LYa_b1_contig_62439 (1..445) consensus	-5.27196	0	TAAGAATTTCAAACTGTTTGGATTTGTTAATTGTTGTTTGTGTACGGACGACAGACACATCATTCCCATCAGAGTGCATTTAGGTTGCACACTTGAGATCACTGGTCTGATACCCAAAGAAACCATGAAAGCATAAAGTAACAGATCGTGCCCGTAGCAAGTCTTGATCCAGTCCCGGAGATAGAAACCTCCCATTCTAGCATTGATCTCAATCAACTTTGGTCCTGTTTTTGTCATTTTCATTTCCACGTTGAACACCCCAGTAACGAGTCCGATTTCCGTACAACACTGATATGCAGAAGTTATAAGCTGTCCTCTCCTGTCTAATGGTAGACATGTTGGCAGCAAGGCTGCTGTTTCTGTGTAAGACCCTTTCCTACATGGTCCATTATCCGAGAC…	5.743e-45	A5YM72	RecName: Full=Carnosine synthase 1; AltName: Full=ATP-grasp domain-containing protein 1
LYa_b1_contig_1793 (1..906) consensus	-5.25229	0	TCAGTTACATTTTGCTATGGTTACAAAGTTATTTGTATGTATTTCAATTTTAATTGAATCAGTTATCCATAAGCCTTTAAATGTTGTACCATACTTTATTAAATTTTCCACCAACGTATAATATGGCTTCTTGTAAAAAAGTAAATTACAAATGTATTGTTGTAAATCAGACAAAAGGTTCTTTTACCTTAACAGATGTCAAAAAGTAAATGTATACAAATAAGGTTTTGGTACTGCTTTCAGATCAGATTTTGAGCTTTACTAAACAAAGTTTAAATGCTGCTTGGAAATAAATATTATTGTACACTGTTTGCAAAAATCTGATATAATTATAAAGGTAAATCTTAAAAGAATGATTTAAATCTATAAATAGAGCATTTCAATCTGTTATTCCCCAAA…	0	not available	not available
LYa_b1_contig_455161 (310..512) consensus	-5.02294	0	TCCTGACATCTGTTCAAATCACACATAATCTTTTTGACTTATCCAGTATTTTTAACTGATATACAACCAGGAAATTATCATAACAAAATATTATATACTAGTAGAACATTATCTTACCTTTCTTAGAACCACCATATCCACCGTATCCGTATCCACCTCCGTTTCCACCATATCCACCGTATCCGTATCCACCACCGTTTCCA	0	not available	not available
LYa_b1_contig_35054 (1..363) consensus	-4.94376	0	ATCCTGGTCTACTCTCTATTTTTGCTGATCCGGCCGTTCCAGGTCGTTGCTCTGTTTTTTTATCTGTATCTTCATCTTCCTCATCTCCTTCACCTCGTACTATTTTACCGTTAACTTCGTCTAAAGCTTTTTTAATGGCTTGTTCTGCTACATTGTCTTCTAAATCTTTAGCGATTTGTAACGATTCTTCAAATGATGAGGCTGCTGCTTGTAATTCACCATTTTTAACTTCAGATTGTGCTACTAAAACTGAGGCGTGTAATTTCCATGTGTCATCTTCTGCCTCTTTGGCTGCCTCTAGAGCTTTCCTTCCGTTGTCCCTAGCATCTACATATTGGTTTAATTCTAGATGACATCGTCCTA	3.125e-15	Q7ZU45	RecName: Full=Tetratricopeptide repeat protein 25; Short=TPR repeat protein 25
LYa_b1_contig_390473 (1..375) consensus	-4.88862	0	TTACAATATAATTTATTGTCTGTTTTGTAATTTCGAGAAAAGAACATCTTAGTATTTCTTCCCCCCACCATATCCTGCGCCATATCCTCCGCCATATCCACCTAATCCATATCCACCTAATCCATAACCGCCATAGCTGACTAAACCACCTAATCCACCATAGCCCAAACCTCCTAATCCACCATATCCTCCGAAACCGCCTAACCCACCATATCCTCCGCCATACCCTTTGCCATAACCATATCCTCCACCATAACCATCAAATCCTCCGCCATAACCGCCATAGCTGACTAAACCGCCTAATCCACCATAGCCCAAACCTCCTAATCCACCATAGCCGCCTAAATCTCCTAATCCACCATATCCGCCATCATA	0	not available	not available
LYa_b1_contig_354933 (1..960) consensus	-4.81272	0	ACAACAAGATATTTTCAAGATGATTTTATTCCACACCATATTTCTATTGATGACAGTTGCCGCAGTGGCACCAATGGCACCTAAAGAATATTCCCCAAAGACAAAAAGTGGAACTTGTCCAAAAGAAACACATGCCGAACTAGCAGTTTGCAAGGAAGAATGTAAAAATGACCAAGGATGTCCAGGCGTCGAGCTTTGCTGCCGACTAAGCGCCTGTTCAACTTACTGCCGAAGTCCAGTTGGTCATCAAGGCGGGAAACGCACATCACTCGTACTGACTGATGCTGGTAGCCATTTGGGAGCAAGTGGCATTGGATCGTCCCGTGGTATGAATGATAATTTAGCAGCACACTCATCTTCTTCTGGAACTGGTGCAACAGGAAGAGGGCACTCATCGTC…	0.001273	P14730	RecName: Full=WAP four-disulfide core domain protein 18; AltName: Full=Extracellular peptidase inhibitor; AltName: Full=Protein WDNM1; Flags: Precursor
LYa_b1_contig_329992 (1..556) consensus	-4.79042	0	CGCAGCAAAAGACACAAGGAATTCTAGAAGGCATATGAGGCCAGTTATGACAAGCAATTCCCGGTGGCTATCACGCAGTATATAGTTAGCTGTTGCTGCACCAATAATAATGGGTACGAACAATGATGTCGCCATAATGCTAAATACCATGAATACCACTTTAGTTCTTATCAAGCTGTAGTCTGCATTTCTTGCCATATAAGCTGGGACAATTCCTGTGACAACAACCCAAATAGCAGACACCACGGATCCTCCATCTAGTCCGAGCATAATGGTTTTCTTATCAAACGTGAAGGTAGGTATAGTGGCATTTGTAATAACAACTTCTTTCTTCCCTAAATTGTCACAAAATTTCTTGTCGATTCCTATTGAAACGAATGCCATGATTAAACAGCCTAG…	2.15693	A8FCU5	RecName: Full=Heme A synthase; Short=HAS; AltName: Full=Cytochrome aa3-controlling protein
LYa_b1_contig_236769 (1..480) consensus	-4.71685	0	CTGGCAGCTGTCTGCACCAATGCCTCATACCTCAAATGTTGGGGTAAAGGCTGTGGTGGATACGGTGGTGGATACGGTGGTGGATATGGAGGTGGATATGGAGGCCTAGGTGGCTGGGGAGGTGGATATGGAGGCATTGGTGGCTGGGGAGGAGGATGGGGCAAAGGAGGAGGATATGGCCTAGGAGGTGGATACGGAGGATGGGGTCTAGGAGGTGGATACGGAGGATGGGGTAAAGGAGGTGGATGGGGTATCGGAGGTGGATATGGAGGATGGGGTCTAGGAGGTGGATATGGAGGATGGGGCAAAGGAGGTGGATGGGGTATCGGAGGTGGATATGGAGGATGGGGTCTAGGAGGTGGATATGGAGGAATCGGAGGTGGATACGGAGGAATCGGA…	0	not available	not available
LYa_b1_contig_234417 (1224..2030) consensus	-4.704	0	CATTGAATCCTTGTGGTACTCTTGGAACAAATTCTCTGACTTCATGGTGACGTGGTCTGTTCTGGACAATTACGTTTGGTGTTTCATATGGAACATGTTCAACATGAGTTCTGTGTCTGGTCAATTTGACTGGTCTTGGTCTTGGTACATTAACGTGGACGTCGTAATGTTGAACAACTTCTCTTGTGAATGGTACTGGCCTTGGTTTGTCAATTGTGGCGATCAATGGAACAGGTTGGAAGTGTGGTACCTCAACTTTTCTGTCGTAAACCTTTGTGATTTTCTTGAGGAAGTCGACAGCAACTGGTTTGATTACTGTGAATGGTTTTGGAACAAATTTCTTCCTTTCAACTTCGAATGGTGCATCAATATGCTCAACCTGTACAACATGATTGTCGT…	7.651e-07	H2A0K6	RecName: Full=Valine-rich protein; AltName: Full=Alveoline-like protein; Flags: Precursor [Pinctada margaritifera]
LYa_b1_contig_123956 (1..332) consensus	-4.56715	0	TATTCTGTATGATCGCCCATTTATCAAATCATTGTTAAGTTGTACTGTACAGTCTTCCTTTGAGTATGTGATATCTTTGTCCTGACAGCAACGAATGTTCTCACCATATCCAATAGTATACTCAAAGCCACTCATAAAGCCTTTTGCTGGACATTCAAAATATCCTTTCAAATTATAAAATATAGTTTGACATTTTACATTCCTTCCTGGTCCTGGTTTACAGGTGTATCTGATGGGATTAGATAATAACTTGTCATGAACTTCTCCGTCCGGACAGAACATCACATATTTGAACGGATTTTTCGAATACTTTCCACCTTCTGTGACGCAGA	1.28695	Q10980	RecName: Full=Galactoside 2-alpha-L-fucosyltransferase 1; AltName: Full=Alpha 1,2-fucosyltransferase A; AltName: Full=Alpha(1,2)FT 1; AltName: Full=Fucosyltransferase 1; AltName: Full=GDP-L-fucose:beta-D-galactoside 2-alpha-L-fucosyltransferase 1
LYa_b1_contig_7654 (1..2174) consensus	-4.52813	0	AAAATATTTCCCGAAGGAGATGTCAACAAGACTGAAACATCAGACAAATGCATCCCAAACATGTTTAAATATTACATTAACACAATTATAGTTAGCTTCACTATAAGTTATATGGTTCGCTACTGACCCCCTACGGATCCATAGAGGGTTAGTTAAATCCATAGGGGGTGAGGCCGGACCTATAGATTTTATTCACCCTCTGCCGTGATGGATCCGTAGGAGGTTAGTAGTTAACGGTATAACGAATTTATCGCACGCTGGACTTTCCTGCTGAATTTTGTTGAAAAATAAACGATGAAACAGAACAAAATTAATAGATGAGGATCATGACGTCACCATTAACGCGTCATGAACCCCCTATGAAATTTACTAACCCCCTACGGTCTCATAGGGGGTCAC…	1.356e-26	Q9Y259	RecName: Full=Choline/ethanolamine kinase; AltName: Full=Choline kinase beta; Short=CK; Short=CKB; AltName: Full=Choline kinase-like protein; AltName: Full=Ethanolamine kinase; Short=EK; AltName: Full=Ethanolamine kinase beta; Short=EKB; AltName: Full=choline/ethanolamine kinase beta; Short=CKEKB
LYa_b1_contig_7877 (1..748) consensus	-4.18108	0	CCGGAAGTCCTGGAGTACCTTGATCACCCTTTTCTCCTTCCATTCCTGGCACACCTGGTTCACCAATATTTCCTATAGCTCCAGGTAAACCACGTTCTCCGGGATCACCCATTGGTCCTCGTTCACCTTCAAGTCCCGGTGGTCCTTCTCTGCCAGCTTCACCATTAGCACCTGGATGTCCTGGTTCCCCGGGTCTTCCATCAGCTCCTGCGGGTCCAGATTGACCTGGTGATCCAGATTCTCCTTTAGTTCCCGGTTCTCCAGAAGGTCCTGATGGCCCTGGTGATCCTCGCGAATCTCTTTGTGTTCTATAAAATGAAGTAGCCGGGCCAGGTGGACCTGCAGGACCCATTGGACCAGAATCTCCTTTCTGTCCTGGCTGTCCATCTCTACCCGGAA…	0.0233069	Q8CQD9	RecName: Full=Accumulation-associated protein; Flags: Precursor
LYa_b1_contig_20003 (152..433) consensus	-4.15772	0	CCAATGCAATGACTTAGATTGTTAATATATACAAAGTTCCTAGCTCTACAAGTCCGCTATTCTTGAAATGTACAATTGATGAATGATTTATATGAATGATACAAGCGGTAATCGCTAAGCAATGATAAATGGTTTTTATGAATGATTGTAGCGATAATCGCTGAGCACACCTACCACTAACCGTCATTATTTGAAATGACTCAACAGATAGTTGTAGTCATAGTTATTTGTATTCAAACCAAGAGCATTGCCGATATTGATCAGTTTAGCTTTGGCTGTTTC	3.85768	C1DLQ8	RecName: Full=Adenylosuccinate synthetase; Short=AMPSase; Short=AdSS; AltName: Full=IMP--aspartate ligase
